# Supplementary material for: Copper and electrocatalytic synergy for the construction of fused quinazolinones with 2-aminobenzaldehydes and cyclic amines
Source: Royal Society of Chemistry journal article supplement (doi:10.1039/d4ra06539e), 2024-01-01

## Supporting Informations

### **Copper and electrocatalytic synergy for the construction of fused quinazolinones with 2-Aminobenzaldehydes and cyclic amines**

Yujie Shi <sup>a</sup>, Ganpeng Li <sup>a</sup>, Wang Ruirui <sup>b,\*</sup>, Xiao-Jing Zhao <sup>a,\*</sup>, Yonghui He <sup>a,\*</sup>

<sup>a</sup> Key Laboratory of Chemistry in Ethnic Medicinal Resources, State Ethnic Affairs Commission & Ministry of Education, Key Laboratory of Natural Products Synthetic Biology of Ethnic Medicinal Endophytes, State Ethnic Affairs Commission, School of Ethnic Medicine, Yunnan Minzu University Kunming, 650500, China;

<sup>b</sup> College of Chinese Materia Medica, Yunnan University of Chinese Medicine, Kunming 650000, P. R. China.

E-mail: wangruiyucm@126.com; zhaoxj@ymu.edu.cn; heyonghui@ymu.edu.cn.

## Table of Contents

|                                             |     |
|---------------------------------------------|-----|
| 1. General information .....                | S1  |
| 2. Typical experimental procedure .....     | S2  |
| 3. Antibacterial Activity Experiments ..... | S3  |
| 4. Cyclic voltammetry experiments .....     | S4  |
| 5. Analytical data .....                    | S5  |
| 6. Copies of NMR spectra.....               | S19 |

## 1. General information

All glassware was oven dried at 110 °C for several hours and cooled down under vacuum. Unless otherwise noted, materials were obtained from commercial suppliers and used without further purification. **The instrument for electrolysis** was dual display potentiostat (DJS-292B) (made in China). Anode electrode is carbon rod and cathodic electrode is aluminum rod.

Thin-layer chromatography was performed with EMD silica gel 60 F254 plates eluting with solvents indicated, visualized by a 254 nm UV lamp and stained with phosphomolybdic acid (PMA). Flash chromatography columns were packed with 200- 300 mesh silica gel in petroleum (bp. 60-90 °C). **<sup>1</sup>H NMR, <sup>13</sup>C NMR** and spectra were obtained on Bruker Advance III (400 MHz). Chemical shifts were denoted in ppm ( $\delta$ ), and calibrated by using residual undeuterated solvent CDCl<sub>3</sub> (7.26 ppm), tetramethylsilane (0.00 ppm) as internal reference for <sup>1</sup>H NMR and the deuterated solvent CDCl<sub>3</sub> (77.00 ppm) tetramethylsilane (0.00 ppm) as internal standard for <sup>13</sup>C NMR, multiplicities are as indicated: s = singlet, d = doublet, t = triplet, q = quartet, m = multiplet. **High-resolution mass spectral analysis (HRMS) data** was measured on a Waters Acquity UPLC I-Class plus Xevo G2-XS (Q-TOF) mass spectrum by means of the ESI technique.

## 2 Typical experimental procedure

A 15-mL oven-dried undivided three-necked bottle was equipped with a aluminum rod cathode and a carbon rod anode which were connected to a DC regulated power supply (Figure S1). 2-aminobenzaldehyde **1a** (0.2 mmol) or 2-aminoacetophenone **2a** (0.2 mmol), tetrahydroisoquinoline **3a** (0.3 mmol), NH<sub>4</sub>I (0.5 mmol), Cu(CH<sub>3</sub>COO)<sub>2</sub> (0.003 mmol) and <sup>n</sup>Bu<sub>4</sub>NBF<sub>4</sub> (0.5 mmol) dissolved in 10 mL CH<sub>3</sub>OH, 30 °C, under O<sub>2</sub> atmosphere were added to the cell and electrolyzed at a constant current of 5 mA. The electrolysis was terminated when the starting materials were consumed as determined by TLC. After electrolysis, the reaction mixture was diluted in 40 mL ethyl acetate, washed with a saturated solution of brine (3 × 15 mL), dried (Na<sub>2</sub>SO<sub>4</sub>) and concentrated in vacuum, and the resulting residue was purified by silica gel column chromatography (petroleum/ethyl acetate) to afford the products desired product **4a**.

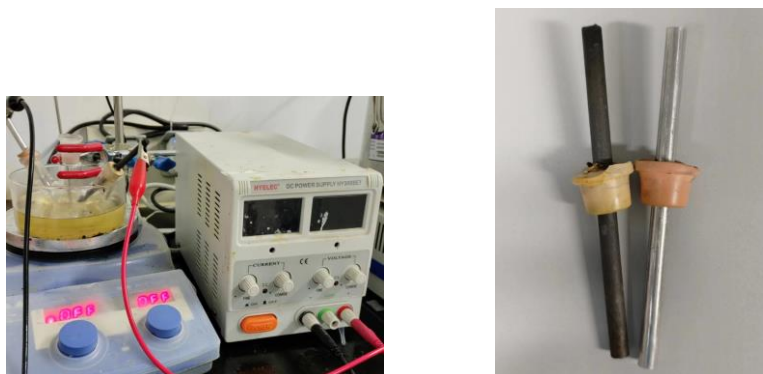

Figure S1 Electrolysis setup

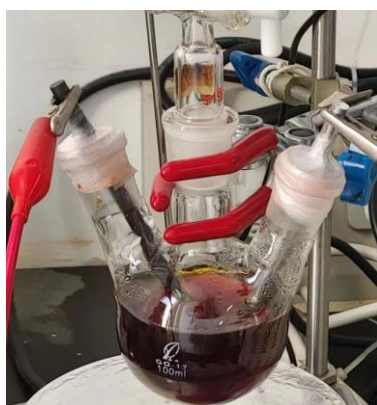

Figure S2 Gram-scale amplification Electrolysis setup

### 3 Antibacterial Activity Experiments

**Table S1** Summary of antibacterial activity of test samples and fluconazole against *Candida albicans*<sup>a</sup>

| Compound | MIC <sub>50</sub> (ug/mL)                              |                                                                | FICI                                                   |                                                                |
|----------|--------------------------------------------------------|----------------------------------------------------------------|--------------------------------------------------------|----------------------------------------------------------------|
|          | Candida albicans fluconazole sensitive strain (SC5314) | Fluconazole resistant strains of Candida albicans (ATCC 14053) | Candida albicans fluconazole sensitive strain (SC5314) | Fluconazole resistant strains of Candida albicans (ATCC 14053) |
| FLC      | 1.53                                                   | >200                                                           | --                                                     | --                                                             |
| 4a       | >200                                                   | >200                                                           | --                                                     | --                                                             |
| 4r       | >200                                                   | >200                                                           | --                                                     | --                                                             |
| 4t       | >200                                                   | >200                                                           | --                                                     | --                                                             |
| 4o       | >200                                                   | >200                                                           | --                                                     | --                                                             |
| 4v       | >200                                                   | >200                                                           | --                                                     | --                                                             |
| 4i       | >200                                                   | >200                                                           | --                                                     | --                                                             |
| 4b       | >200                                                   | >200                                                           | --                                                     | --                                                             |
| 4f       | >200                                                   | >200                                                           | --                                                     | --                                                             |
| 4j       | >200                                                   | >200                                                           | --                                                     | --                                                             |
| 4k       | >200                                                   | >200                                                           | --                                                     | --                                                             |
| 4c       | >200                                                   | >200                                                           | --                                                     | --                                                             |
| 4h       | >200                                                   | >200                                                           | --                                                     | --                                                             |
| 4l       | >200                                                   | >200                                                           | --                                                     | --                                                             |
| 4n       | >200                                                   | >200                                                           | --                                                     | --                                                             |
| 4e       | >200                                                   | >200                                                           | --                                                     | --                                                             |
| 4m       | >200                                                   | >200                                                           | --                                                     | --                                                             |
| 4d       | >200                                                   | >200                                                           | --                                                     | --                                                             |
| 4y       | >200                                                   | >200                                                           | --                                                     | --                                                             |
| 4g       | >200                                                   | >200                                                           | --                                                     | --                                                             |
| 4a+FLC   | 1.81                                                   | 12.11                                                          | 1.19                                                   | 0.061                                                          |
| 4r+FLC   | 1.31                                                   | 2.54                                                           | 0.86                                                   | 0.013                                                          |
| 4t+FLC   | 1.06                                                   | 1.41                                                           | 0.70                                                   | 0.007                                                          |
| 4o+FLC   | 2.16                                                   | 11.02                                                          | 1.42                                                   | 0.055                                                          |
| 4v+FLC   | 1.56                                                   | 73.49                                                          | 1.03                                                   | 0.367                                                          |
| 4i+FLC   | 1.99                                                   | 28.28                                                          | 1.30                                                   | 0.049                                                          |
| 4b+FLC   | 1.26                                                   | 38.92                                                          | 0.83                                                   | 0.062                                                          |
| 4f+FLC   | 1.40                                                   | 4.14                                                           | 0.92                                                   | 0.021                                                          |
| 4j+FLC   | 1.61                                                   | 72.53                                                          | 1.06                                                   | 0.363                                                          |
| 4k+FLC   | 1.37                                                   | 21.23                                                          | 0.90                                                   | 0.106                                                          |
| 4c+FLC   | 1.03                                                   | 1.37                                                           | 0.67                                                   | 0.007                                                          |
| 4h+FLC   | 1.61                                                   | 14.48                                                          | 1.05                                                   | 0.072                                                          |
| 4l+FLC   | 0.79                                                   | 1.39                                                           | 0.52                                                   | 0.007                                                          |
| 4n+FLC   | 1.40                                                   | >200                                                           | 0.92                                                   | --                                                             |
| 4e+FLC   | 1.75                                                   | 1.81                                                           | 1.15                                                   | 0.009                                                          |
| 4m+FLC   | 2.63                                                   | 3.25                                                           | 1.73                                                   | 0.016                                                          |

|        |      |       |      |       |
|--------|------|-------|------|-------|
| 4d+FLC | 1.56 | 14.47 | 1.02 | 0.072 |
| 4y+FLC | 1.20 | 2.82  | 0.79 | 0.014 |
| 4g+FLC | 1.33 | 12.15 | 0.87 | 0.061 |

<sup>a</sup> Take a 96 well culture plate, dilute the sample and fluconazole to an initial concentration of 200  $\mu$ g/mL, with 100  $\mu$  L per well, and perform 5-fold dilution. There are 6 concentration gradients, with 3 replicate wells for each concentration gradient. After activating the strain twice, prepare a fungal suspension. Add 100  $\mu$  L of fungal suspension to each well of a 96 well plate to achieve a final concentration of  $1 \times 10^5$  CFU/mL. Incubate in a 37  $^{\circ}$ C constant temperature incubator for 24 hours. Measure the OD value at 625nm using an enzyme-linked immunosorbent assay (ELISA) reader. Simultaneously set up blank control of culture medium, bacterial solution control, and fluconazole positive drug control in the experiment.

#### 4 Cyclic voltammetry experiments

Cyclic voltammetry was performed in a three-electrode cell connected to a schlenk line under nitrogen at room temperature. The working electrode was a steady glassy carbon disk electrode ( $\approx 5.0 \text{ mm}^2$ ), the counter electrode a platinum wire. The reference was an Ag/AgNO<sub>3</sub> electrode submerged in 0.1 M nBu<sub>4</sub>NClO<sub>4</sub> and 0.01 M AgNO<sub>3</sub> in CH<sub>3</sub>CN. 10 mL of CH<sub>3</sub>OH were poured into the electrochemical cell in all experiments. The redox potential of ferrocene/ferrocenium (Fc/Fc<sup>+</sup>) was measured (same experimental conditions) and used to provide an internal reference. The potential values were then adjusted relative to Fc/Fc<sup>+</sup>. The scan rate is 0.1 V/s, ranging from -0.2 V to 1.0 V.

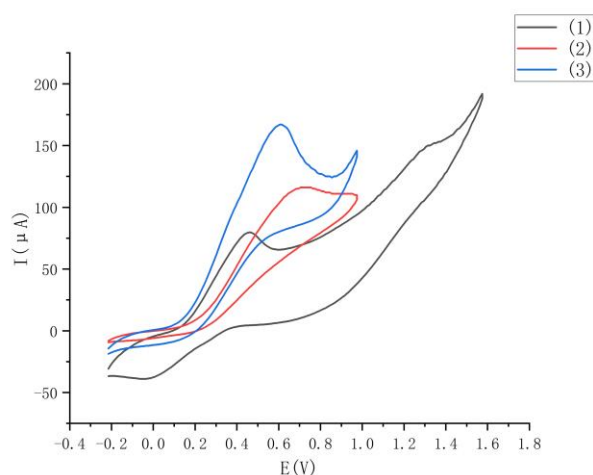

Figure S3 CV plotting convention (IUPAC)

In the Figure S3, cyclic voltammograms of in 10 mL of CH<sub>3</sub>OH solution containing different compounds: (1) nBu<sub>4</sub>NBF<sub>4</sub> (0.05 mmol), NH<sub>4</sub>I (0.05 mmol); (2) nBu<sub>4</sub>NBF<sub>4</sub> (0.05 mmol), NH<sub>4</sub>I (0.05 mmol), tetrahydroisoquinoline (0.03 mmol); (3)

$n\text{Bu}_4\text{NBF}_4$  (0.05 mmol),  $\text{NH}_4\text{I}$  (0.05 mmol), 2-aminobenzaldehyde (0.02 mmol); with a GC disk working electrode ( $\approx 5.0 \text{ mm}^2$ ), Pt counter electrode, and Ag/AgNO<sub>3</sub> reference electrode (internal solution, 0.1 M  $n\text{Bu}_4\text{NClO}_4$  and 0.01 M AgNO<sub>3</sub> in CH<sub>3</sub>CN) at 0.1 V/s scan rate.

## 5 Analytical data

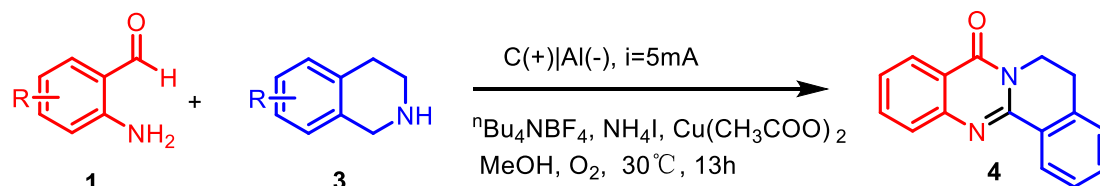

General procedure for the preparation of **4a**: A 10-mL oven-dried undivided three-necked bottle was equipped with a aluminum rod cathode and a carbon rod anode, constant current = 5 mA, **1a** (0.2mmol), **3a** (0.3 mmol),  $n\text{Bu}_4\text{NBF}_4$  (0.5 mmol),  $\text{NH}_4\text{I}$  (0.5 mmol),  $\text{Cu}(\text{CH}_3\text{COO})_2$  (0.003 mmol), CH<sub>3</sub>OH (10 mL), 30°C, under O<sub>2</sub> atmosphere, undivided cell. Then stirred for 13 h. The resulting brown mixture was concentrated under a vacuum, the crude product was purified by flash column chromatography using petroleum ether/ethyl acetate (30:1) to give the title compounds **4a**.

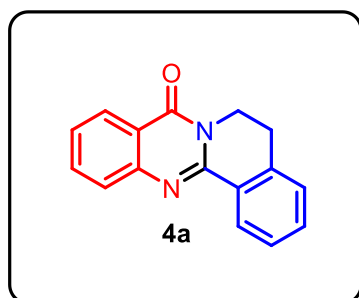

**5,6-dihydro-8H-isoquinolino[1,2-b]quinazolin-8-one (4a)**: According to the general procedure, **4a** was obtained using 2-aminobenzaldehyde **1** (24.2 mg, 0.2 mmol) and tetrahydroisoquinoline **3** (40.0 mg, 0.3 mmol) in 94% yield (46.6 mg) and as a yellow solid (silica gel flash chromatography: petroleum ether/ethyl acetate = 15:1).

<sup>1</sup>H NMR (400 MHz, DMSO-*d*<sub>6</sub>)  $\delta$  8.37 (d,  $J = 6.4 \text{ Hz}$ , 1H), 8.18 – 8.15 (m, 1H), 7.85 – 7.81 (m, 1H), 7.74 (d,  $J = 6.8 \text{ Hz}$ , 1H), 7.57 – 7.50 (m, 2H), 7.47 (t,  $J = 3.6 \text{ Hz}$ , 1H), 7.41 (d,  $J = 7.6 \text{ Hz}$ , 1H), 4.31 – 4.28 (t, 2H), 3.13 – 3.10 (t, 2H).

<sup>13</sup>C NMR (100 MHz, DMSO-*d*<sub>6</sub>)  $\delta$  160.6, 149.3, 147.3, 137.7, 134.4, 131.8, 129.1, 127.8, 127.4, 127.3, 127.2, 126.5, 126.3, 120.4, 39.2, 26.4.

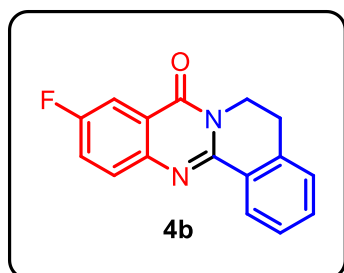

**10-fluoro-5,6-dihydro-8H-isoquinolino[1,2-b]quinazolin-8-one(4b)**: According to the general procedure, **4b** was obtained using 2-Amino-5-fluorobenzaldehyde (27.8 mg, 0.2 mmol) and

tetrahydroisoquinoline **3** (40.0 mg, 0.3 mmol) in 69% yield (36.7 mg) and as a yellow solid (silica gel flash chromatography: petroleum ether/ethyl acetate = 30:1).

$^1\text{H NMR}$  (400 MHz,  $\text{DMSO-}d_6$ )  $\delta$  8.33 (d,  $J = 7.6$  Hz, 1H), 7.83 – 7.79 (m, 2H), 7.74 – 7.69 (m, 1H), 7.54 (t,  $J = 7.6$  Hz, 1H), 7.45 (t,  $J = 8.0$  Hz, 1H), 7.40 (d,  $J = 7.6$  Hz, 1H), 4.30 – 4.27 (t, 2H), 3.13 – 3.09 (t, 2H).

$^{13}\text{C NMR}$  (100 MHz,  $\text{CDCl}_3$ )  $\delta$  160.8, 160.5 (d,  $J = 244.0$  Hz), 148.6, 144.3, 136.8, 131.6, 129.9, 129.1, 127.7, 127.4, 122.7 (d,  $J = 24.0$  Hz), 121.7, 111.4 (d,  $J = 23.0$  Hz), 39.6, 27.2.

$^{19}\text{F NMR}$  (376 MHz,  $\text{CDCl}_3$ )  $\delta$  -113.2.

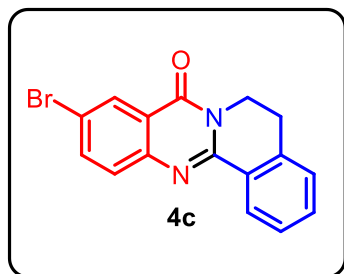

**10-bromo-5,6-dihydro-8H-isoquinolino[1,2-b]quinazolin-8-one(4c):** According to the general procedure, **4c** was obtained using 2-Amino-5-bromobenzaldehyde (40.0 mg, 0.2 mmol) and tetrahydroisoquinoline **3** (40.0 mg, 0.3 mmol) in 81% yield (52.8 mg) and as a yellow solid (silica gel flash chromatography: petroleum ether/ethyl acetate = 25:1).

$^1\text{H NMR}$  (400 MHz,  $\text{DMSO-}d_6$ )  $\delta$  8.35 (d,  $J = 7.6$  Hz, 1H), 8.23 (d,  $J = 2.4$  Hz, 1H), 7.98 – 7.96 (m, 1H), 7.69 (d,  $J = 8.4$  Hz, 1H), 7.58 – 7.54 (m, 1H), 7.48 – 7.40 (m, 2H), 4.29 – 4.27 (t, 2H), 3.13 – 3.10 (t, 2H).

$^{13}\text{C NMR}$  (100 MHz,  $\text{CDCl}_3$ )  $\delta$  160.7, 149.8, 146.7, 137.5, 137.1, 132.1, 129.5, 129.5, 129.3, 128.1, 127.8, 127.7, 122.1, 120.0, 39.9, 27.4.

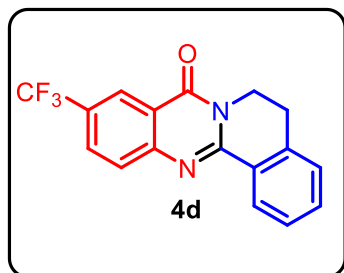

**10-trifluoromethyl-5,6-dihydro-8H-isoquinolino[1,2-b]quinazolin-8-one(4d):** According to the general procedure, **4d** was obtained using 2-Amino-5-trifluoromethylbenzaldehyde (37.8 mg, 0.2 mmol) and tetrahydroisoquinoline **3** (40.0 mg, 0.3 mmol) in 70% yield (44.3 mg) and as a yellow solid (silica gel flash chromatography: petroleum ether/ethyl acetate = 25:1).

$^1\text{H NMR}$  (400 MHz,  $\text{CDCl}_3$ )  $\delta$  8.46 (d,  $J = 6.4$  Hz, 1H), 7.70 – 7.64 (m, 1H), 7.56 (d,  $J = 8.4$  Hz, 1H), 7.52 – 7.48 (m, 1H), 7.44 (t,  $J = 7.6$  Hz, 1H), 7.30 (d,  $J = 7.6$  Hz, 1H), 7.12 – 7.07 (m, 1H), 4.40 – 4.37 (t, 2H), 3.12 – 3.09 (t, 2H).

$^{13}\text{C NMR}$  (100 MHz,  $\text{CDCl}_3$ )  $\delta$  161.5 (d,  $J = 264.0$  Hz), 159.0 (d,  $J = 4.0$  Hz), 150.4 (d,  $J = 1.0$  Hz), 150.0, 137.4, 134.6 (d,  $J = 10.0$  Hz), 132.2, 129.2, 128.3, 127.8, 127.7, 123.7 (d,  $J = 4.0$  Hz), 113.1 (d,  $J = 21.0$  Hz), 110.6 (d,  $J = 7.0$  Hz), 39.4, 27.5.

$^{19}\text{F NMR}$  (376 MHz,  $\text{CDCl}_3$ )  $\delta$  -111.8.



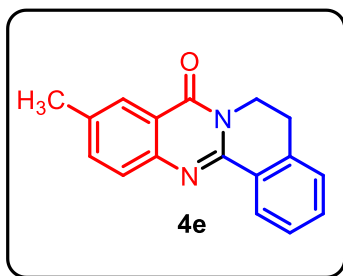

**10-methyl-5,6-dihydro-8H-isoquinolino[1,2-b]quinazolin-8-one(4e):** According to the general procedure, **4e** was obtained using 2-Amino-5-methylbenzaldehyde (27.0 mg, 0.2 mmol) and tetrahydroisoquinoline **3** (40.0 mg, 0.3 mmol) in 85% yield (44.6 mg) and as a yellow solid (silica gel flash chromatography: petroleum ether/ethyl acetate = 30:1).

**<sup>1</sup>H NMR** (400 MHz, CDCl<sub>3</sub>) δ 8.55 – 8.52 (m, 1H), 8.16 (d, *J* = 8.0 Hz, 1H), 7.60 (d, *J* = 7.2 Hz, 1H), 7.49 – 7.41 (m, 2H), 7.34 (t, *J* = 7.6 Hz, 1H), 7.28 (d, *J* = 5.6 Hz, 1H), 4.43 – 4.40 (t, 2H), 3.12 – 3.08 (t, 2H), 2.71 (s, 3H).

**<sup>13</sup>C NMR** (100 MHz, CDCl<sub>3</sub>) δ 162.2, 148.1, 146.4, 137.1, 136.3, 134.9, 131.7, 130.1, 128.2, 127.7, 127.6, 126.3, 124.7, 120.8, 39.7, 27.6, 17.4.

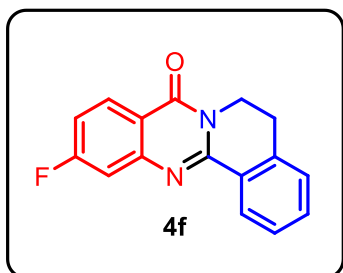

**11-fluoro-5,6-dihydro-8H-isoquinolino[1,2-b]quinazolin-8-one(4f):** According to the general procedure, **4f** was obtained using 2-Amino-4-fluorobenzaldehyde (27.8 mg, 0.2 mmol) and tetrahydroisoquinoline **3** (40.0 mg, 0.3 mmol) in 71% yield (37.8 mg) and as a yellow solid (silica gel flash chromatography: petroleum ether/ethyl acetate = 30:1).

**<sup>1</sup>H NMR** (400 MHz, CDCl<sub>3</sub>) δ 8.46 (d, *J* = 8.0 Hz, 1H), 8.32 – 8.29 (m, 1H), 7.51 – 7.43 (m, 2H), 7.41 – 7.38 (m, 1H), 7.29 (d, *J* = 7.6 Hz, 1H), 7.19 – 7.14 (m, 1H), 4.41 – 4.38 (t, 2H), 3.12 – 3.08 (t, 2H).

**<sup>13</sup>C NMR** (100 MHz, CDCl<sub>3</sub>) δ 166.6 (d, *J* = 252.0 Hz), 161.2, 150.7, 150.1 (d, *J* = 13.0 Hz), 137.3, 132.2, 129.7 (d, *J* = 11.0 Hz), 129.4, 128.3, 127.8, 127.7, 117.6 (d, *J* = 2.0 Hz), 115.4 (d, *J* = 23.0 Hz), 112.8 (d, *J* = 22.0 Hz), 39.7, 27.5.

**<sup>19</sup>F NMR** (376 MHz, CDCl<sub>3</sub>) δ -103.9.

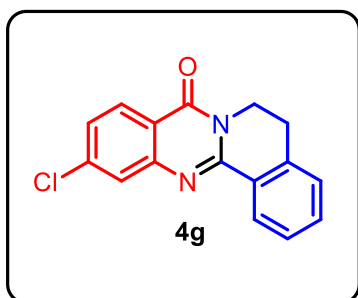

**11-chloro-5,6-dihydro-8H-isoquinolino[1,2-b]quinazolin-8-one(4g):** According to the general

l procedure, **4g** was obtained using 2-Amino-4-chlorobenzaldehyde (31.1 mg, 0.2 mmol) and tetrahydroisoquinoline **3** (40.0 mg, 0.3 mmol) in 95% yield (53.6 mg) and as a yellow solid (silica gel flash chromatography: petroleum ether/ethyl acetate = 30:1).

**<sup>1</sup>H NMR** (400 MHz, CDCl<sub>3</sub>) δ 8.46 – 8.43 (m, 1H), 8.22 (d, *J* = 8.4 Hz, 1H), 7.75 (d, *J* = 2.0 Hz, 1H), 7.51 – 7.43 (m, 2H), 7.40 – 7.38 (m, 1H), 7.29 (d, *J* = 7.6 Hz, 1H), 4.40 – 4.37 (t, 2H), 3.12 – 3.08 (t, 2H).

**<sup>13</sup>C NMR** (100 MHz, CDCl<sub>3</sub>) δ 160.3, 150.7, 148.9, 140.5, 137.2, 132.2, 129.3, 128.5, 128.3, 127.8, 127.7, 127.2, 127.2, 119.3, 39.7, 27.5.

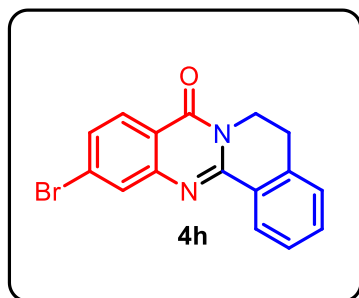

**11-bromo-5,6-dihydro-8H-isoquinolino[1,2-b]quinazolin-8-one(4h):** According to the general procedure, **4h** was obtained using 2-Amino-4-bromobenzaldehyde (40.0 mg, 0.2 mmol) and tetrahydroisoquinoline **3** (40.0 mg, 0.3 mmol) in 90% yield (58.7 mg) and as a yellow solid (silica gel flash chromatography: petroleum ether/ethyl acetate = 25:1).

**<sup>1</sup>H NMR** (400 MHz, CDCl<sub>3</sub>) δ 8.36 – 8.34 (m, 1H), 8.05 (d, *J* = 8.8 Hz, 1H), 7.84 (d, *J* = 2.0 Hz, 1H), 7.46 – 7.32 (m, 3H), 7.20 (d, *J* = 8.0 Hz, 1H), 4.31 – 4.28 (t, 2H), 3.03 – 3.00 (t, 2H).

**<sup>13</sup>C NMR** (100 MHz, CDCl<sub>3</sub>) δ 161.4, 150.6, 148.9, 137.2, 132.2, 130.3, 129.9, 129.3, 129.0, 128.4, 128.3, 127.8, 127.7, 119.6, 39.7, 27.4.

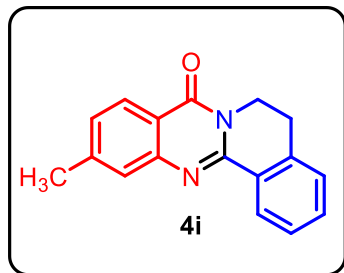

**11-methyl-5,6-dihydro-8H-isoquinolino[1,2-b]quinazolin-8-one(4i):** According to the general procedure, **4i** was obtained using 2-Amino-4-methylbenzaldehyde (27.0 mg, 0.2 mmol) and tetrahydroisoquinoline **3** (40.0 mg, 0.3 mmol) in 87% yield (45.6 mg) and as a yellow solid (silica gel flash chromatography: petroleum ether/ethyl acetate = 30:1).

**<sup>1</sup>H NMR** (400 MHz, CDCl<sub>3</sub>) δ 8.48 – 8.46 (m, 1H), 8.19 (d, *J* = 8.0 Hz, 1H), 7.57 (s, 1H), 7.49 – 7.40 (m, 2H), 7.28 (d, *J* = 6.8 Hz, 2H), 4.41 – 4.38 (t, 2H), 3.11 – 3.07 (t, 2H), 2.51 (s, 3H).

**<sup>13</sup>C NMR** (100 MHz, CDCl<sub>3</sub>) δ 161.8, 149.6, 148.0, 145.3, 137.2, 131.8, 129.8, 128.3, 128.1, 127.7, 127.6, 127.4, 126.8, 118.5, 39.6, 27.6, 22.0.

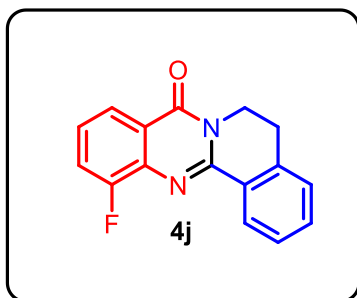

**12-fluoro-5,6-dihydro-8H-isoquinolino[1,2-b]quinazolin-8-one(4j):** According to the general procedure, **4j** was obtained using 2-Amino-3-fluorobenzaldehyde (27.8 mg, 0.2 mmol) and tetrahydroisoquinoline **3** (40.0 mg, 0.3 mmol) in 67% yield (35.7 mg) and as a yellow solid (silica gel flash chromatography: petroleum ether/ethyl acetate = 30:1).

**<sup>1</sup>H NMR** (400 MHz, CDCl<sub>3</sub>) δ 8.56 – 8.53 (m, 1H), 8.10 – 8.08 (m, 1H), 7.51 – 7.44 (m, 3H), 7.41 – 7.36 (m, 1H), 7.29 (d, *J* = 7.2 Hz, 1H), 4.44 – 4.41 (t, 2H), 3.13 – 3.10 (t, 2H).

**<sup>13</sup>C NMR** (100 MHz, CDCl<sub>3</sub>) δ 161.0 (d, *J* = 3.0 Hz), 157.4 (d, *J* = 255.0 Hz), 150.0, 137.6 (d, *J* = 12.0 Hz), 137.1, 132.2, 129.5, 128.6, 127.9, 127.6, 126.5 (d, *J* = 8.0 Hz), 122.8 (d, *J* = 1.0 Hz), 122.5 (d, *J* = 4.0 Hz), 119.7 (d, *J* = 19.0 Hz), 39.9, 27.5 .

**<sup>19</sup>F NMR** (376 MHz, CDCl<sub>3</sub>) δ -125.6.

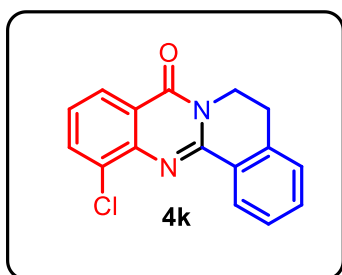

**12-chloro-5,6-dihydro-8H-isoquinolino[1,2-b]quinazolin-8-one(4k):** According to the general procedure, **4k** was obtained using 2-Amino-3-chlorobenzaldehyde (31.1 mg, 0.2 mmol) and tetrahydroisoquinoline **3** (40.0 mg, 0.3 mmol) in 81% yield (45.7 mg) and as a yellow solid (silica gel flash chromatography: petroleum ether/ethyl acetate = 30:1).

**<sup>1</sup>H NMR** (400 MHz, CDCl<sub>3</sub>) δ 8.44 (d, *J* = 4.0 Hz, 1H), 8.25 (d, *J* = 2.4 Hz, 1H), 7.70 – 7.64 (m, 2H), 7.50 – 7.40 (m, 2H), 7.28 (d, *J* = 7.2 Hz, 1H), 4.41 – 4.38 (t, 2H), 3.11 – 3.08 (t, 2H).

**<sup>13</sup>C NMR** (100 MHz, CDCl<sub>3</sub>) δ 160.9, 149.7, 146.5, 137.1, 134.8, 132.3, 132.1, 129.4, 128.2, 127.8, 127.7, 126.3, 121.8, 39.9, 27.5.

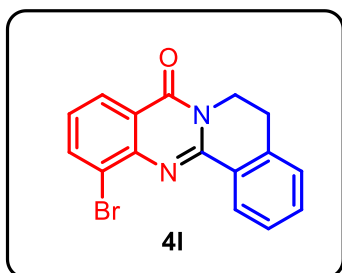

**12-bromo-5,6-dihydro-8H-isoquinolino[1,2-b]quinazolin-8-one(4l):** According to the general procedure, **4l** was obtained using 2-Amino-3-bromobenzaldehyde (40.0 mg, 0.2 mmol) and

tetrahydroisoquinoline **3** (40.0 mg, 0.3 mmol) in 77% yield (50.2 mg) and as a yellow solid (silica gel flash chromatography: petroleum ether/ethyl acetate = 25:1).

$^1\text{H NMR}$  (400 MHz,  $\text{CDCl}_3$ )  $\delta$  8.34 – 8.32 (m, 1H), 8.30 (d,  $J = 2.4$  Hz, 1H), 7.71 – 7.68 (m, 1H), 7.50 (d,  $J = 8.8$  Hz, 1H), 7.40 – 7.36 (m, 1H), 7.34 – 7.30 (m, 1H), 7.17 (d,  $J = 7.2$  Hz, 1H), 4.30 – 4.27 (t, 2H), 3.01 – 2.98 (t, 2H).

$^{13}\text{C NMR}$  (100 MHz,  $\text{CDCl}_3$ )  $\delta$  160.6, 149.8, 146.7, 137.4, 137.1, 132.0, 129.5, 129.5, 129.3, 128.1, 127.8, 127.6, 122.1, 120.0, 39.8, 27.4.

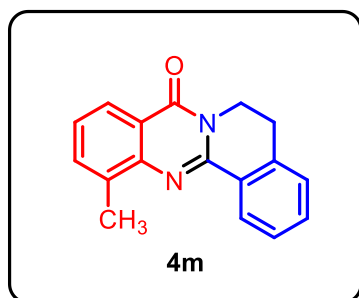

**12-methyl-5,6-dihydro-8H-isoquinolino[1,2-b]quinazolin-8-one(4m):** According to the general procedure, **4m** was obtained using 2-Amino-3-methylbenzaldehyde (27.0 mg, 0.2 mmol) and tetrahydroisoquinoline **3** (40.0 mg, 0.3 mmol) in 91% yield (47.7 mg) and as a yellow solid (silica gel flash chromatography: petroleum ether/ethyl acetate = 30:1).

$^1\text{H NMR}$  (400 MHz,  $\text{CDCl}_3$ )  $\delta$  8.41 – 8.39 (m, 1H), 8.03 (d,  $J = 8.0$  Hz, 1H), 7.46 (d,  $J = 6.8$  Hz, 1H), 7.35 – 7.28 (m, 2H), 7.21 (t,  $J = 7.6$  Hz, 1H), 7.14 (t,  $J = 5.6$  Hz, 1H), 4.29 – 4.26 (t, 2H), 2.98 – 2.95 (t, 2H), 2.59 (s, 3H).

$^{13}\text{C NMR}$  (100 MHz,  $\text{CDCl}_3$ )  $\delta$  162.1, 148.0, 146.3, 137.0, 136.1, 134.7, 131.6, 130.0, 128.1, 127.6, 127.5, 126.1, 124.6, 120.7, 39.6, 27.5, 17.4.

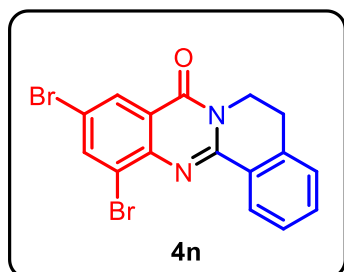

**10,12-dibromo-5,6-dihydro-8H-isoquinolino[1,2-b]quinazolin-8-one(4n):** According to the general procedure, **4n** was obtained using 2-Amino-3,5-Dibromobenzaldehyde (55.8 mg, 0.2 mmol) and tetrahydroisoquinoline **3** (40.0 mg, 0.3 mmol) in 63% yield (50.9 mg) and as a yellow solid (silica gel flash chromatography: petroleum ether/ethyl acetate = 20:1).

$^1\text{H NMR}$  (400 MHz,  $\text{CDCl}_3$ )  $\delta$  8.60 – 8.57 (m, 1H), 8.39 (d,  $J = 2.0$  Hz, 1H), 8.13 (d,  $J = 2.0$  Hz, 1H), 7.54 – 7.49 (m, 1H), 7.49 – 7.44 (m, 1H), 7.29 (d,  $J = 8.0$  Hz, 1H), 4.42 – 4.38 (t, 2H), 3.13 – 3.10 (t, 2H).

$^{13}\text{C NMR}$  (100 MHz,  $\text{CDCl}_3$ )  $\delta$  160.3, 150.5, 144.7, 140.4, 137.1, 132.6, 129.6, 129.2, 128.8, 128.1, 127.7, 124.1, 123.0, 119.6, 40.1, 27.3.

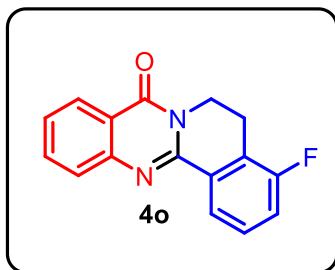

**4-fluoro-5,6-dihydro-8H-isoquinolino[1,2-b]quinazolin-8-one(4o):** According to the general procedure, **4o** was obtained using 2-aminobenzaldehyde **1** (24.2 mg, 0.2 mmol) and 5-Fluoro-1,2,3,4-tetrahydroisoquinoline hydrochloride (56.3 mg, 0.3 mmol) in 53% yield (28.2 mg) and as a yellow solid (silica gel flash chromatography: petroleum ether/ethyl acetate = 30:1).

**<sup>1</sup>H NMR** (400 MHz, CDCl<sub>3</sub>) δ 8.53 – 8.49 (m, 1H), 8.31 (d, *J* = 8.0 Hz, 1H), 8.76 – 8.74 (m, 2H), 7.48 – 7.44 (m, 1H), 7.15 – 7.10 (m, 1H), 7.01 – 6.98 (m, 1H), 4.44 – 4.41 (t, 2H), 3.12 – 3.08 (t, 2H).

**<sup>13</sup>C NMR** (100 MHz, CDCl<sub>3</sub>) δ 164.9 (d, *J* = 252.0 Hz), 161.8, 148.8, 147.9, 139.8 (d, *J* = 9.0 Hz), 134.5, 130.9 (d, *J* = 10.0 Hz), 127.7, 127.1, 126.7, 126.0 (dd, *J* = 8.0, 5.0 Hz), 120.8, 115.3 (d, *J* = 21.0 Hz), 114.4 (d, *J* = 22.0 Hz), 39.6, 27.7.

**<sup>19</sup>F NMR** (376 MHz, CDCl<sub>3</sub>) δ -107.6.

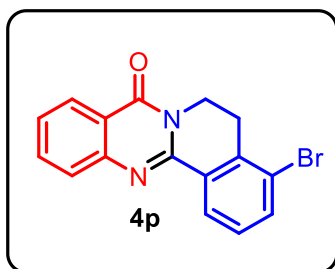

**4-bromo-5,6-dihydro-8H-isoquinolino[1,2-b]quinazolin-8-one(4p):** According to the general procedure, **4p** was obtained using 2-aminobenzaldehyde **1** (24.2 mg, 0.2 mmol) and 5-bromo-1,2,3,4-tetrahydroisoquinoline hydrochloride (74.6 mg, 0.3 mmol) in 51% yield (33.3 mg) and as a yellow solid (silica gel flash chromatography: petroleum ether/ethyl acetate = 30:1).

**<sup>1</sup>H NMR** (400 MHz, CDCl<sub>3</sub>) δ 8.51 (d, *J* = 8.0 Hz, 1H), 8.32 (d, *J* = 8.0 Hz, 1H), 7.80 – 7.72 (m, 3H), 7.51 – 7.47 (m, 1H), 7.32 (t, *J* = 8.0 Hz, 1H), 4.44 – 4.40 (t, 2H), 3.24 – 3.21 (t, 2H).

**<sup>13</sup>C NMR** (100 MHz, CDCl<sub>3</sub>) δ 161.7, 147.8, 136.9, 136.6, 134.5, 131.9, 128.2, 127.9, 127.5, 127.1, 127.1, 123.5, 120.9, 39.2, 27.6.

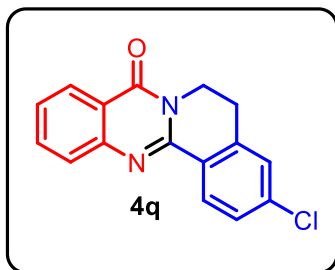

**3-chloro-5,6-dihydro-8H-isoquinolino[1,2-b]quinazolin-8-one(4q):** According to the general procedure, **4q** was obtained using 2-aminobenzaldehyde **1** (24.2 mg, 0.2 mmol) and 6-Chloro-1,2,3,4-tetrahydroisoquinoline hydrochloride (61.2 mg, 0.3 mmol) in 50% yield (28.2 mg) and as a yellow solid (silica gel flash chromatography: petroleum ether/ethyl acetate = 25:1).

<sup>1</sup>H NMR (400 MHz, DMSO-*d*<sub>6</sub>) δ 8.35 (d, *J* = 8.4 Hz, 1H), 8.18 – 8.15 (m, 1H), 7.86 – 7.82 (m, 1H), 7.74 (d, *J* = 8.4 Hz, 1H), 7.55 – 7.51(m, 3H), 4.31 – 4.28 (t, 2H), 3.14 – 3.11 (t, 2H).

<sup>13</sup>C NMR (100 MHz, CDCl<sub>3</sub>) δ 161.7, 148.7, 147.7, 138.7, 138.0, 134.5, 129.7, 128.2, 128.1, 127.7, 127.7, 127.1, 126.9, 120.8, 39.5, 27.4.

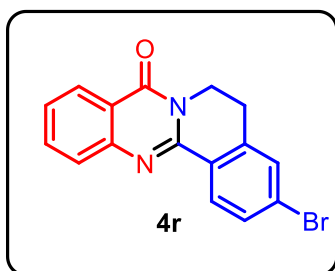

**3-bromo-5,6-dihydro-8H-isoquinolino[1,2-b]quinazolin-8-one(4r):** According to the general procedure, **4r** was obtained using 2-aminobenzaldehyde **1** (24.2 mg, 0.2 mmol) and 6-bromo-1,2,3,4-tetrahydroisoquinoline hydrochloride (74.6 mg, 0.3 mmol) in 51% yield (33.3 mg) and as a yellow solid (silica gel flash chromatography: petroleum ether/ethyl acetate = 30:1).

<sup>1</sup>H NMR (400 MHz, CDCl<sub>3</sub>) δ 8.36 (d, *J* = 8.4 Hz, 1H), 8.30 (d, *J* = 8.0 Hz, 1H), 7.76 – 7.75 (m, 2H), 7.58 – 7.55 (m, 1H), 7.49 – 7.45 (m, 2H), 4.42 – 4.39 (t, 2H), 3.10 – 3.07 (t, 2H).

<sup>13</sup>C NMR (100 MHz, CDCl<sub>3</sub>) δ 161.7, 148.8, 147.8, 138.9, 134.5, 131.1, 130.7, 129.9, 128.7, 127.8, 127.1, 126.9, 126.6, 120.9, 39.6, 27.4.

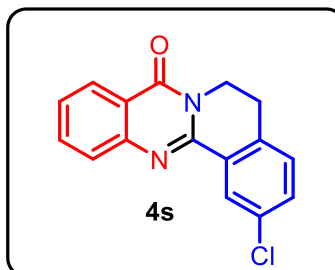

**2-chloro-5,6-dihydro-8H-isoquinolino[1,2-b]quinazolin-8-one(4s):** According to the general procedure, **4s** was obtained using 2-aminobenzaldehyde **1** (24.2 mg, 0.2 mmol) and 7-Chloro-1,2,3,4-tetrahydroisoquinoline hydrochloride (61.2 mg, 0.3 mmol) in 52% yield (29.3 mg)

and as a yellow solid (silica gel flash chromatography: petroleum ether/ethyl acetate = 25:1).

$^1\text{H NMR}$  (400 MHz,  $\text{DMSO-}d_6$ )  $\delta$  8.31 (d,  $J = 2.4$  Hz, 1H), 8.18 – 8.15 (m, 1H), 7.87 – 7.83 (m, 1H), 7.78 (d,  $J = 8.0$  Hz, 1H), 7.62 – 7.59 (m, 1H), 7.56 – 7.52 (m, 1H), 7.46 (d,  $J = 8.0$  Hz, 1H), 4.30 – 4.27 (t, 2H), 3.13 – 3.10 (t, 2H).

$^{13}\text{C NMR}$  (100 MHz,  $\text{CDCl}_3$ )  $\delta$  161.7, 148.3, 147.6, 135.4, 134.5, 133.8, 131.8, 131.2, 129.1, 128.0, 127.8, 127.1, 127.0, 121.0, 39.6, 27.1.

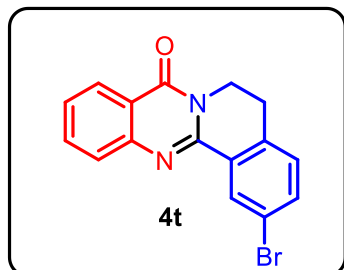

**2-bromo-5,6-dihydro-8H-isoquinolino[1,2-b]quinazolin-8-one(4t):** According to the general procedure, **4t** was obtained using 2-aminobenzaldehyde **1** (24.2 mg, 0.2 mmol) and 7-bromo-o-1,2,3,4-tetrahydroisoquinoline hydrochloride (74.6 mg, 0.3 mmol) in 86% yield (56.1 mg) and as a yellow solid (silica gel flash chromatography: petroleum ether/ethyl acetate = 30:1).

$^1\text{H NMR}$  (400 MHz,  $\text{CDCl}_3$ )  $\delta$  8.63 (d,  $J = 2.0$  Hz, 1H), 8.31 (d,  $J = 8.0$  Hz, 1H), 7.78 – 7.77 (d, 2H), 7.60 – 7.57 (m, 1H), 7.50 – 7.46 (m, 1H), 7.18 (d,  $J = 8.0$  Hz, 1H), 4.42 – 4.39 (t, 2H), 3.08 – 3.05 (t, 2H).

$^{13}\text{C NMR}$  (100 MHz,  $\text{CDCl}_3$ )  $\delta$  161.7, 148.1, 147.7, 135.9, 134.7, 134.6, 131.5, 130.9, 129.3, 127.9, 127.1, 127.1, 121.6, 121.0, 39.6, 27.2.

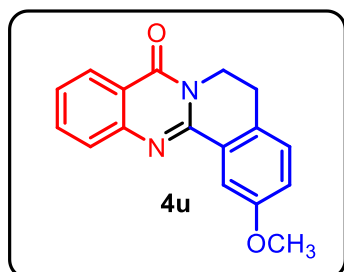

**2-methoxy-5,6-dihydro-8H-isoquinolino[1,2-b]quinazolin-8-one(4u):** According to the general procedure, **4u** was obtained using 2-aminobenzaldehyde **1** (24.2 mg, 0.2 mmol) and 7-methoxy-1,2,3,4-tetrahydroisoquinoline hydrochloride (48.9 mg, 0.3 mmol) in 57% yield (31.7 mg) and as a yellow solid (silica gel flash chromatography: petroleum ether/ethyl acetate = 15:1).

$^1\text{H NMR}$  (400 MHz,  $\text{CDCl}_3$ )  $\delta$  8.32 (d,  $J = 7.6$  Hz, 1H), 8.01 (d,  $J = 2.8$  Hz, 1H), 7.80 – 7.74 (m, 2H), 7.47 (t,  $J = 1.6$  Hz, 1H), 7.20 (d,  $J = 8.4$  Hz, 1H), 7.06 – 7.04 (m, 1H), 4.42 – 4.38 (t, 2H), 3.94 (s, 3H), 3.06 – 3.02 (t, 2H).

$^{13}\text{C NMR}$  (100 MHz,  $\text{CDCl}_3$ )  $\delta$  161.9, 159.2, 149.5, 147.8, 134.4, 130.6, 129.6, 128.8, 127.7, 127.0, 126.7, 120.9, 119.4, 111.4, 55.8, 30.0, 26.8.

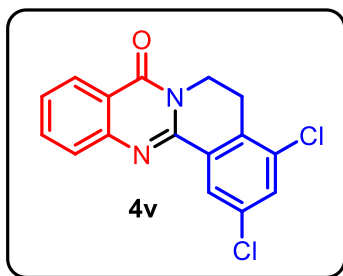

**2,4-dichloro-5,6-dihydro-8H-isoquinolino[1,2-b]quinazolin-8-one(4v):** According to the general procedure, **4v** was obtained using 2-aminobenzaldehyde **1** (24.2 mg, 0.2 mmol) and 5,7-Chloro-1,2,3,4-tetrahydroisoquinoline hydrochloride (60.3 mg, 0.3 mmol) in 43% yield (31.0 mg) and as a yellow solid (silica gel flash chromatography: petroleum ether/ethyl acetate = 20:1).

<sup>1</sup>H NMR (400 MHz, CDCl<sub>3</sub>) δ 8.46 (d, *J* = 2.0 Hz, 1H), 8.33 – 8.31 (m, 1H), 7.79 – 7.78 (m, 2H), 7.78 (d, *J* = 8.0 Hz, 1H), 7.53 – 7.49 (m, 1H), 4.41 – 4.40 (t, 2H), 3.20 – 3.17 (t, 2H).

<sup>13</sup>C NMR (100 MHz, CDCl<sub>3</sub>) δ 160.4, 146.3, 133.5, 132.8, 132.7, 132.4, 131.5, 130.7, 126.8, 126.3, 125.9, 125.6, 119.8, 37.8, 23.2.

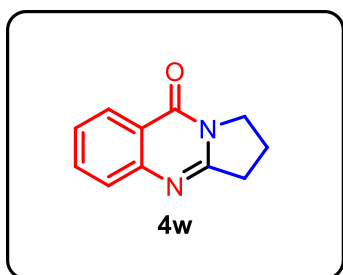

**2,3-dihydropyrrolo[2,1-b]quinazolin-9(1H)-one(4w):** According to the general procedure, **4w** was obtained using 2-aminobenzaldehyde **1** (24.2 mg, 0.2 mmol) and Pyrrolidine (21.3 mg, 0.3 mmol) in 26% yield (9.7 mg) and as a yellow solid (silica gel flash chromatography: petroleum ether/ethyl acetate = 10:1).

<sup>1</sup>H NMR (400 MHz, CDCl<sub>3</sub>) δ 7.67 – 7.65 (m, 1H), 7.54 – 7.47 (m, 2H), 7.32 – 7.28 (m, 1H), 1.33 – 1.25 (t, 6H).

<sup>13</sup>C NMR (100 MHz, CDCl<sub>3</sub>) δ 144.6, 134.9, 134.3, 129.2, 124.5, 120.5, 31.6, 30.3, 29.9.

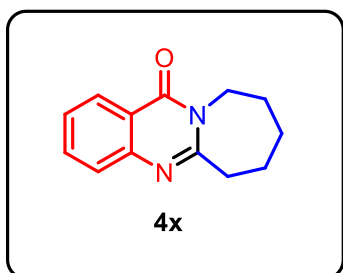

**7,8,9,10-tetrahydroazepino[2,1-b]quinazolin-12(6H)-one(4x):** According to the general procedure, **4x** was obtained using 2-aminobenzaldehyde **1** (24.2 mg, 0.2 mmol) and Hexamethyleneimine (29.8 mg, 0.3 mmol) in 35% yield (15.0 mg) and as a yellow oil (silica gel flash chromatography: petroleum ether/ethyl acetate = 10:1).



**<sup>1</sup>H NMR** (400 MHz, CDCl<sub>3</sub>) δ 8.27 – 8.24 (m, 1H), 7.73 – 7.69 (m, 1H), 7.61 (d, *J* = 8.0 Hz, 1H), 7.46 – 7.42 (m, 1H), 4.41– 4.38 (t, 2H), 3.09 – 3.06 (t, 2H), 1.89 – 1.81 (m, 6H),.

**<sup>13</sup>C NMR** (100 MHz, CDCl<sub>3</sub>) δ 162.1, 160.0, 134.4, 127.2, 126.8, 126.6, 120.3, 43.1, 37.8, 29.7, 28.2, 25.6.

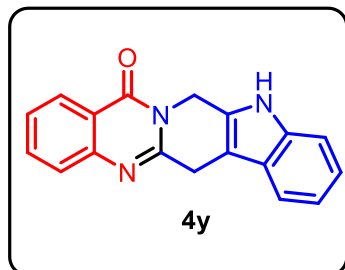

**6,14-dihydroindolo [3',2':4,5] pyrido[2,1-b] quinazolin-8(5H)-one(4y):** According to the general procedure, **4y** was obtained using 2-aminobenzaldehyde **1** (24.2 mg, 0.2 mmol) and 1,2,3,4-Tetrahydro-9H-Pyrido [3,4-B] Indole (51.7 mg, 0.3 mmol) in 22% yield (12.6 mg) and as a yellow solid (silica gel flash chromatography: petroleum ether/ethyl acetate = 10:1).

**<sup>1</sup>H NMR** (400 MHz, CDCl<sub>3</sub>) δ 9.59 (s, 1H), 8.34 – 8.31 (m, 1H), 7.72 – 7.68 (m, 1H), 7.65 – 7.62 (t, 2H), 7.44 – 7.40 (m, 1H), 7.36 (d, *J* = 8.0 Hz, 1H), 7.31 (t, *J* = 8.0 Hz, 1H), 7.17 (t, *J* = 7.6 Hz, 1H), 4.61– 4.57 (t, 2H), 3.25 – 3.22 (t, 2H).

**<sup>13</sup>C NMR** (100 MHz, CDCl<sub>3</sub>) δ 161.7, 147.5, 145.3, 138.5, 134.5, 127.4, 127.2, 126.6, 126.4, 125.7, 125.7, 121.3, 120.7, 120.2, 118.6, 112.3, 41.3, 19.8.

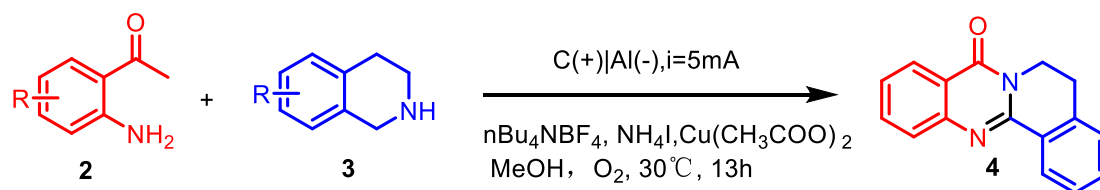

General procedure for the preparation of **4a**: A 10-mL oven-dried undivided three-necked bottle was equipped with a aluminum rod cathode and a carbon rod anode, constant current = 5 mA, **2a** (0.2mmol), **3a** (0.3 mmol), <sup>n</sup>Bu<sub>4</sub>NBF<sub>4</sub> (0.5 mmol), NH<sub>4</sub>I (0.5 mmol), Cu(CH<sub>3</sub>COO)<sub>2</sub> (0.003 mmol), CH<sub>3</sub>OH (10 mL), 30°C, under O<sub>2</sub> atmosphere, undivided cell. Then stirred for 15 h. The resulting brown mixture was concentrated under a vacuum, the crude product was purified by flash column chromatography using petroleum ether/ethyl acetate (30:1) to give the title compounds **4a**.

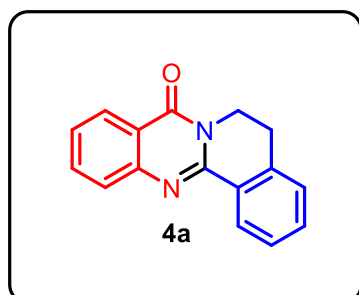

**5,6-dihydro-8H-isoquinolino[1,2-b] quinazolin-8-one (4a):** According to the general procedure, **4a** was obtained using 2-Aminoacetophenone **2** (27.0 mg, 0.2 mmol) and tetrahydroisquinoline **3** (40.0 mg, 0.3 mmol) in 60% yield (29.8 mg) and as a yellow solid (silica gel flash chromatography: petroleum ether/ethyl acetate = 30:1).

**<sup>1</sup>H NMR** (400 MHz, CDCl<sub>3</sub>) δ 8.38 (d, *J* = 7.6 Hz, 1H), 8.21 (d, *J* = 7.6 Hz, 1H), 7.67 – 7.64 (m, 2H), 7.38 – 7.33 (m, 3H), 7.19 – 7.17 (m, 1H), 4.33 – 4.29 (t, 2H), 3.01 – 2.98 (t, 2H).

**<sup>13</sup>C NMR** (100 MHz, CDCl<sub>3</sub>) δ 160.6, 149.3, 146.7, 136.0, 133.2, 130.7, 128.5, 126.9, 126.6, 126.5, 126.5, 125.8, 125.5, 119.7, 39.2, 26.4.

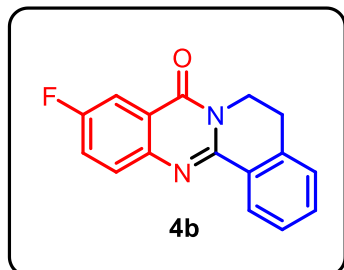

**10-fluoro-5,6-dihydro-8H-isoquinolino[1,2-b]quinazolin-8-one(4b):** According to the general procedure, **4b** was obtained using 1-(2-Amino-5-fluorophenyl)ethanone (30.6 mg, 0.2 mmol) and tetrahydroisoquinoline **3** (40.0 mg, 0.3 mmol) in 49% yield (26.1 mg) and as a yellow solid (silica gel flash chromatography: petroleum ether/ethyl acetate = 30:1).

**<sup>1</sup>H NMR** (400 MHz, CDCl<sub>3</sub>) δ 8.35 (d, *J* = 7.6 Hz, 1H), 7.83 (d, *J* = 8.4 Hz, 1H), 7.66 (s, 1H), 7.39 – 7.34 (m, 3H), 7.19 (d, *J* = 6.8 Hz, 1H), 4.33 – 4.29 (t, 2H), 3.03 – 2.99 (t, 2H).

**<sup>13</sup>C NMR** (100 MHz, CDCl<sub>3</sub>) δ 161.1 (d, *J* = 4.0 Hz), 160.8 (d, *J* = 247.0 Hz), 148.9, 144.6, 137.0, 131.9, 130.1 (d, *J* = 8.0 Hz), 129.4, 128.0, 127.8, 127.6, 123.0 (d, *J* = 24.0 Hz), 122.0 (d, *J* = 8.0 Hz), 111.7 (d, *J* = 23.0 Hz), 39.9, 27.5.

**<sup>19</sup>F NMR** (376 MHz, CDCl<sub>3</sub>) δ -113.0.

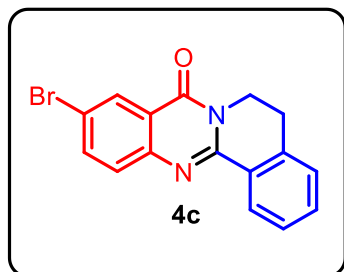

**10-bromo-5,6-dihydro-8H-isoquinolino[1,2-b]quinazolin-8-one(4c):** According to the general procedure, **4c** was obtained using 1-(2-Amino-5-bromophenyl)ethanone (42.8 mg, 0.2 mmol) and tetrahydroisoquinoline **3** (40.0 mg, 0.3 mmol) in 70.6% yield (46.0 mg) and as a yellow solid (silica gel flash chromatography: petroleum ether/ethyl acetate = 25:1).

**<sup>1</sup>H NMR** (400 MHz, CDCl<sub>3</sub>) δ 8.47 – 8.44 (m, 2H), 7.84 – 7.81 (m, 1H), 7.64 (d, *J* = 8.8 Hz, 1H), 7.50 (d, *J* = 7.2 Hz, 1H), 7.44 (d, *J* = 7.6 Hz, 1H), 7.30 (d, *J* = 7.2 Hz, 1H), 4.43 – 4.39 (t, 2H), 3.13 – 3.09 (t, 2H).

**<sup>13</sup>C NMR** (100 MHz, CDCl<sub>3</sub>) δ 160.8, 149.9, 146.8, 137.6, 137.2, 132.2, 129.6, 129.4, 128.2, 127.9, 127.7, 122.2, 120.1, 39.9, 27.5.

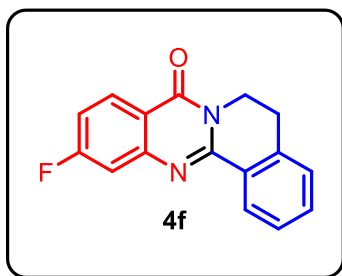

**11-fluoro-5,6-dihydro-8H-isoquinolino[1,2-b]quinazolin-8-one(4f):** According to the general procedure, **4f** was obtained using 1-(2-Amino-4-fluorophenyl)ethanone (30.6 mg, 0.2 mmol) and tetrahydroisoquinoline **3** (40.0 mg, 0.3 mmol) in 40% yield (21.3 mg) and as a yellow solid (silica gel flash chromatography: petroleum ether/ethyl acetate = 30:1).

**<sup>1</sup>H NMR** (400 MHz, CDCl<sub>3</sub>) δ 8.47– 8.44 (m, 1H), 8.32– 8.29 (m, 1H), 7.51 – 7.43 (m, 2H), 7.41 – 7.38 (m, 1H), 7.29 (d, *J* = 7.6 Hz, 1H), 7.19 – 7.14 (m, 1H), 4.41 – 4.38 (t, 2H), 3.12 – 3.08 (t, 2H).

**<sup>13</sup>C NMR** (100 MHz, CDCl<sub>3</sub>) δ 166.6 (d, *J* = 252.0 Hz), 161.2, 150.7, 150.1 (d, *J* = 14.0 Hz), 137.3, 132.2, 129.7 (d, *J* = 11.0 Hz), 129.4, 128.3, 127.8, 127.7, 117.6 (d, *J* = 2.0 Hz), 115.4 (d, *J* = 23.0 Hz), 112.8 (d, *J* = 21.0 Hz), 39.7, 27.5.

**<sup>19</sup>F NMR** (376 MHz, CDCl<sub>3</sub>) δ -103.9.

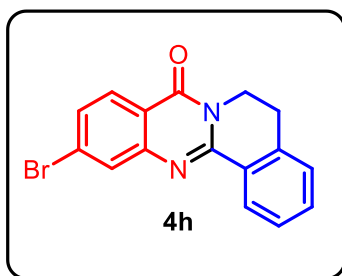

**11-bromo-5,6-dihydro-8H-isoquinolino[1,2-b]quinazolin-8-one(4h):** According to the general procedure, **4h** was obtained using 1-(2-Amino-4-bromophenyl)ethanone (42.8 mg, 0.2 mmol) and tetrahydroisoquinoline **3** (40.0 mg, 0.3 mmol) in 78% yield (50.9 mg) and as a yellow solid (silica gel flash chromatography: petroleum ether/ethyl acetate = 25:1).

**<sup>1</sup>H NMR** (400 MHz, CDCl<sub>3</sub>) δ 8.46 – 8.44 (m, 1H), 8.15 (d, *J* = 8.8 Hz, 1H), 7.95 (d, *J* = 2.0 Hz, 1H), 7.56 – 7.54 (m, 1H), 7.52 – 7.48 (m, 1H), 7.46 – 7.42 (m, 1H), 7.29 (d, *J* = 7.2 Hz, 1H), 4.41 – 4.38 (t, 2H), 3.12 – 3.09 (t, 2H).

**<sup>13</sup>C NMR** (100 MHz, CDCl<sub>3</sub>) δ 161.4, 150.6, 149.0, 137.3, 132.2, 130.4, 130.0, 129.4, 129.0, 128.5, 128.3, 127.9, 127.7, 119.7, 39.8, 27.5.

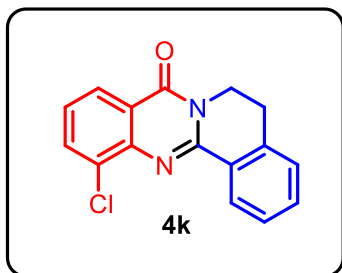

**12-chloro-5,6-dihydro-8H-isoquinolino[1,2-b]quinazolin-8-one(4k):** According to the general procedure, **4k** was obtained using 1-(2-Amino-3-chlorophenyl)ethanone (33.9 mg, 0.2 mmol) and tetrahydroisoquinoline **3** (40.0 mg, 0.3 mmol) in 59% yield (33.9 mg) and as a yellow solid (silica gel flash chromatography: petroleum ether/ethyl acetate = 30:1).

ellow solid (silica gel flash chromatography: petroleum ether/ethyl acetate = 30:1).

**<sup>1</sup>H NMR** (400 MHz, CDCl<sub>3</sub>) δ 8.45 (d, *J* = 7.6 Hz, 1H), 8.26 (d, *J* = 2.4 Hz, 1H), 7.71 – 7.65 (m, 2H), 7.51 – 7.41 (m, 2H), 7.29 (d, *J* = 11.2 Hz, 1H), 4.42 – 4.39 (t, 2H), 3.12 – 3.09 (t, 2H).

**<sup>13</sup>C NMR** (100 MHz, CDCl<sub>3</sub>) δ 161.4, 150.1, 144.6, 137.1, 134.6, 132.3, 132.2, 129.5, 128.7, 128.0, 127.6, 126.6, 125.9, 122.4, 39.9, 27.4.

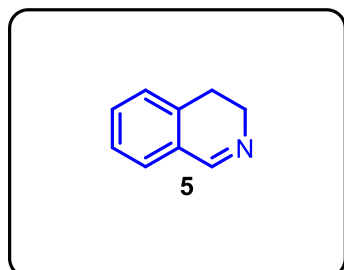

**3,4-dihydroisoquinoline(5):** 48% yield (12.6 mg) and as a yellow solid (silica gel flash chromatography: petroleum ether/ethyl acetate = 30:1).

**<sup>1</sup>H NMR** (400 MHz, CDCl<sub>3</sub>) δ 8.25 (s, 1H), 7.30 – 7.26 (m, 1H), 7.24 – 7.18 (m, 2H), 7.08 (d, *J* = 7.6 Hz, 1H), 4.71 – 4.67 (m, 2H), 2.69 – 2.65 (t, 2H).

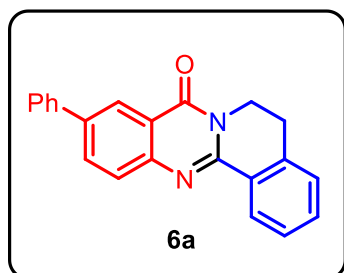

**10-phenyl-5,6-dihydro-8H-isoquinolino[1,2-b]quinazolin-8-one(6a):** 80% yield (13.0 mg) and as a yellow solid (silica gel flash chromatography: petroleum ether/ethyl acetate = 30:1).

**<sup>1</sup>H NMR** (400 MHz, CDCl<sub>3</sub>) δ 8.57 (s, 1H), 8.51 (d, *J* = 7.6 Hz, 1H), 8.02 (d, *J* = 8.8 Hz, 1H), 7.85 (d, *J* = 7.2 Hz, 1H), 7.74 – 7.72 (d, 2H), 7.51 – 7.45 (m, 4H), 7.44 – 7.37 (m, 1H), 7.31 (d, *J* = 7.2 Hz, 1H), 4.47 – 4.44 (t, 2H), 3.15 – 3.11 (t, 2H).

**<sup>13</sup>C NMR** (100 MHz, CDCl<sub>3</sub>) δ 162.0, 149.5, 147.2, 139.9, 139.5, 137.2, 133.3, 131.9, 129.8, 129.1, 128.3, 128.2, 127.9, 127.8, 127.7, 127.3, 124.9, 121.1, 39.9, 27.6.



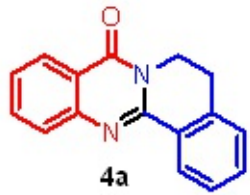

$^1\text{H}$  NMR (400 MHz,  $\text{DMSO-}d_6$ )

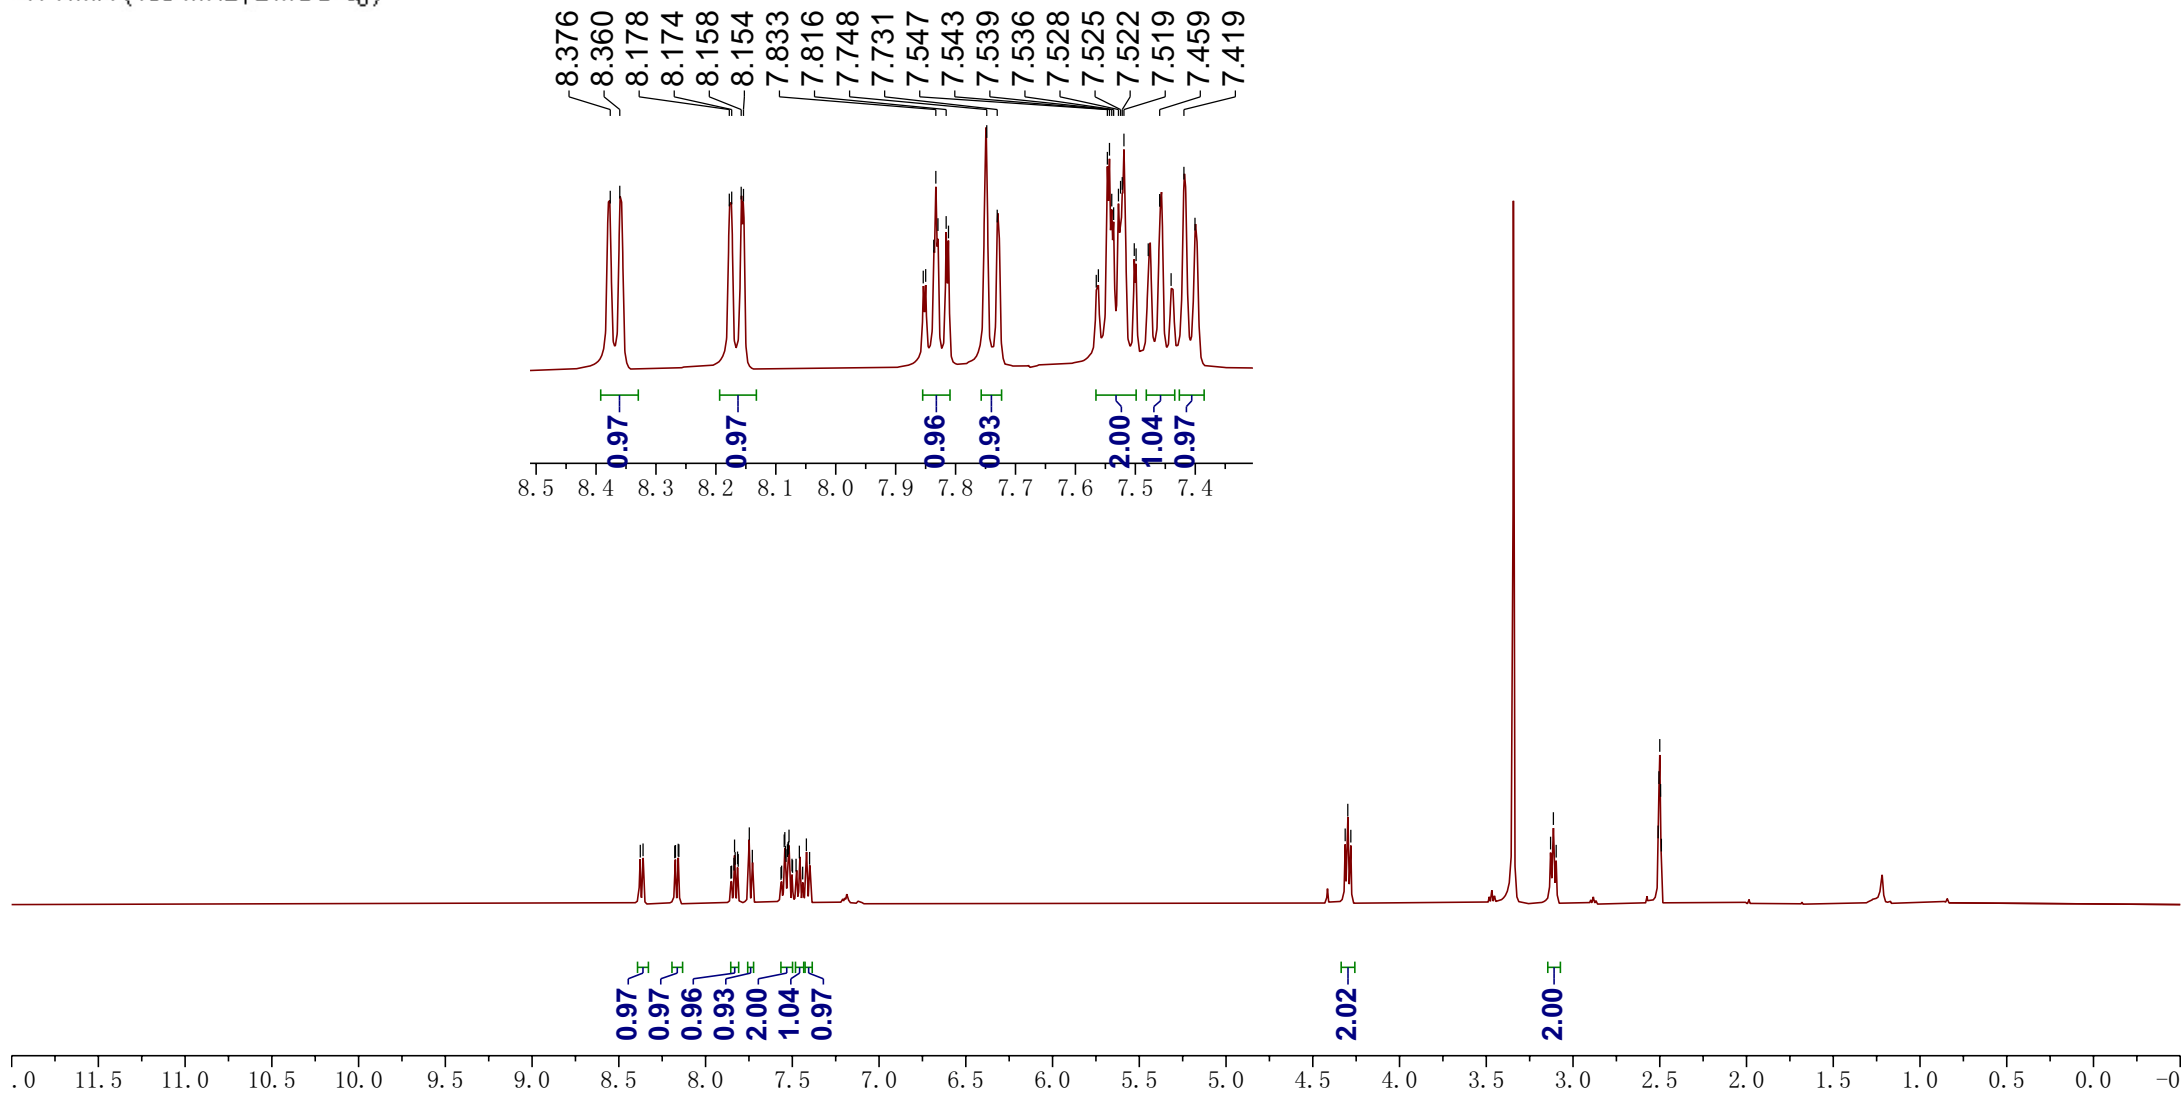

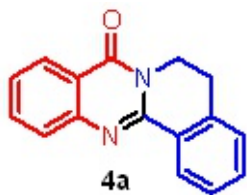

$^{13}\text{C}$  NMR (100 MHz,  $\text{DMSO-}d_6$ )

- 160.61
- 149.30
- 147.29
- 137.74
- 134.39
- 131.77
- 129.07
- 127.79
- 127.38
- 127.30
- 127.20
- 126.53
- 126.30
- 120.38

- 40.15
- 39.94
- 39.73
- 39.52
- 39.31
- 39.24
- 39.10
- 38.89
- 26.40

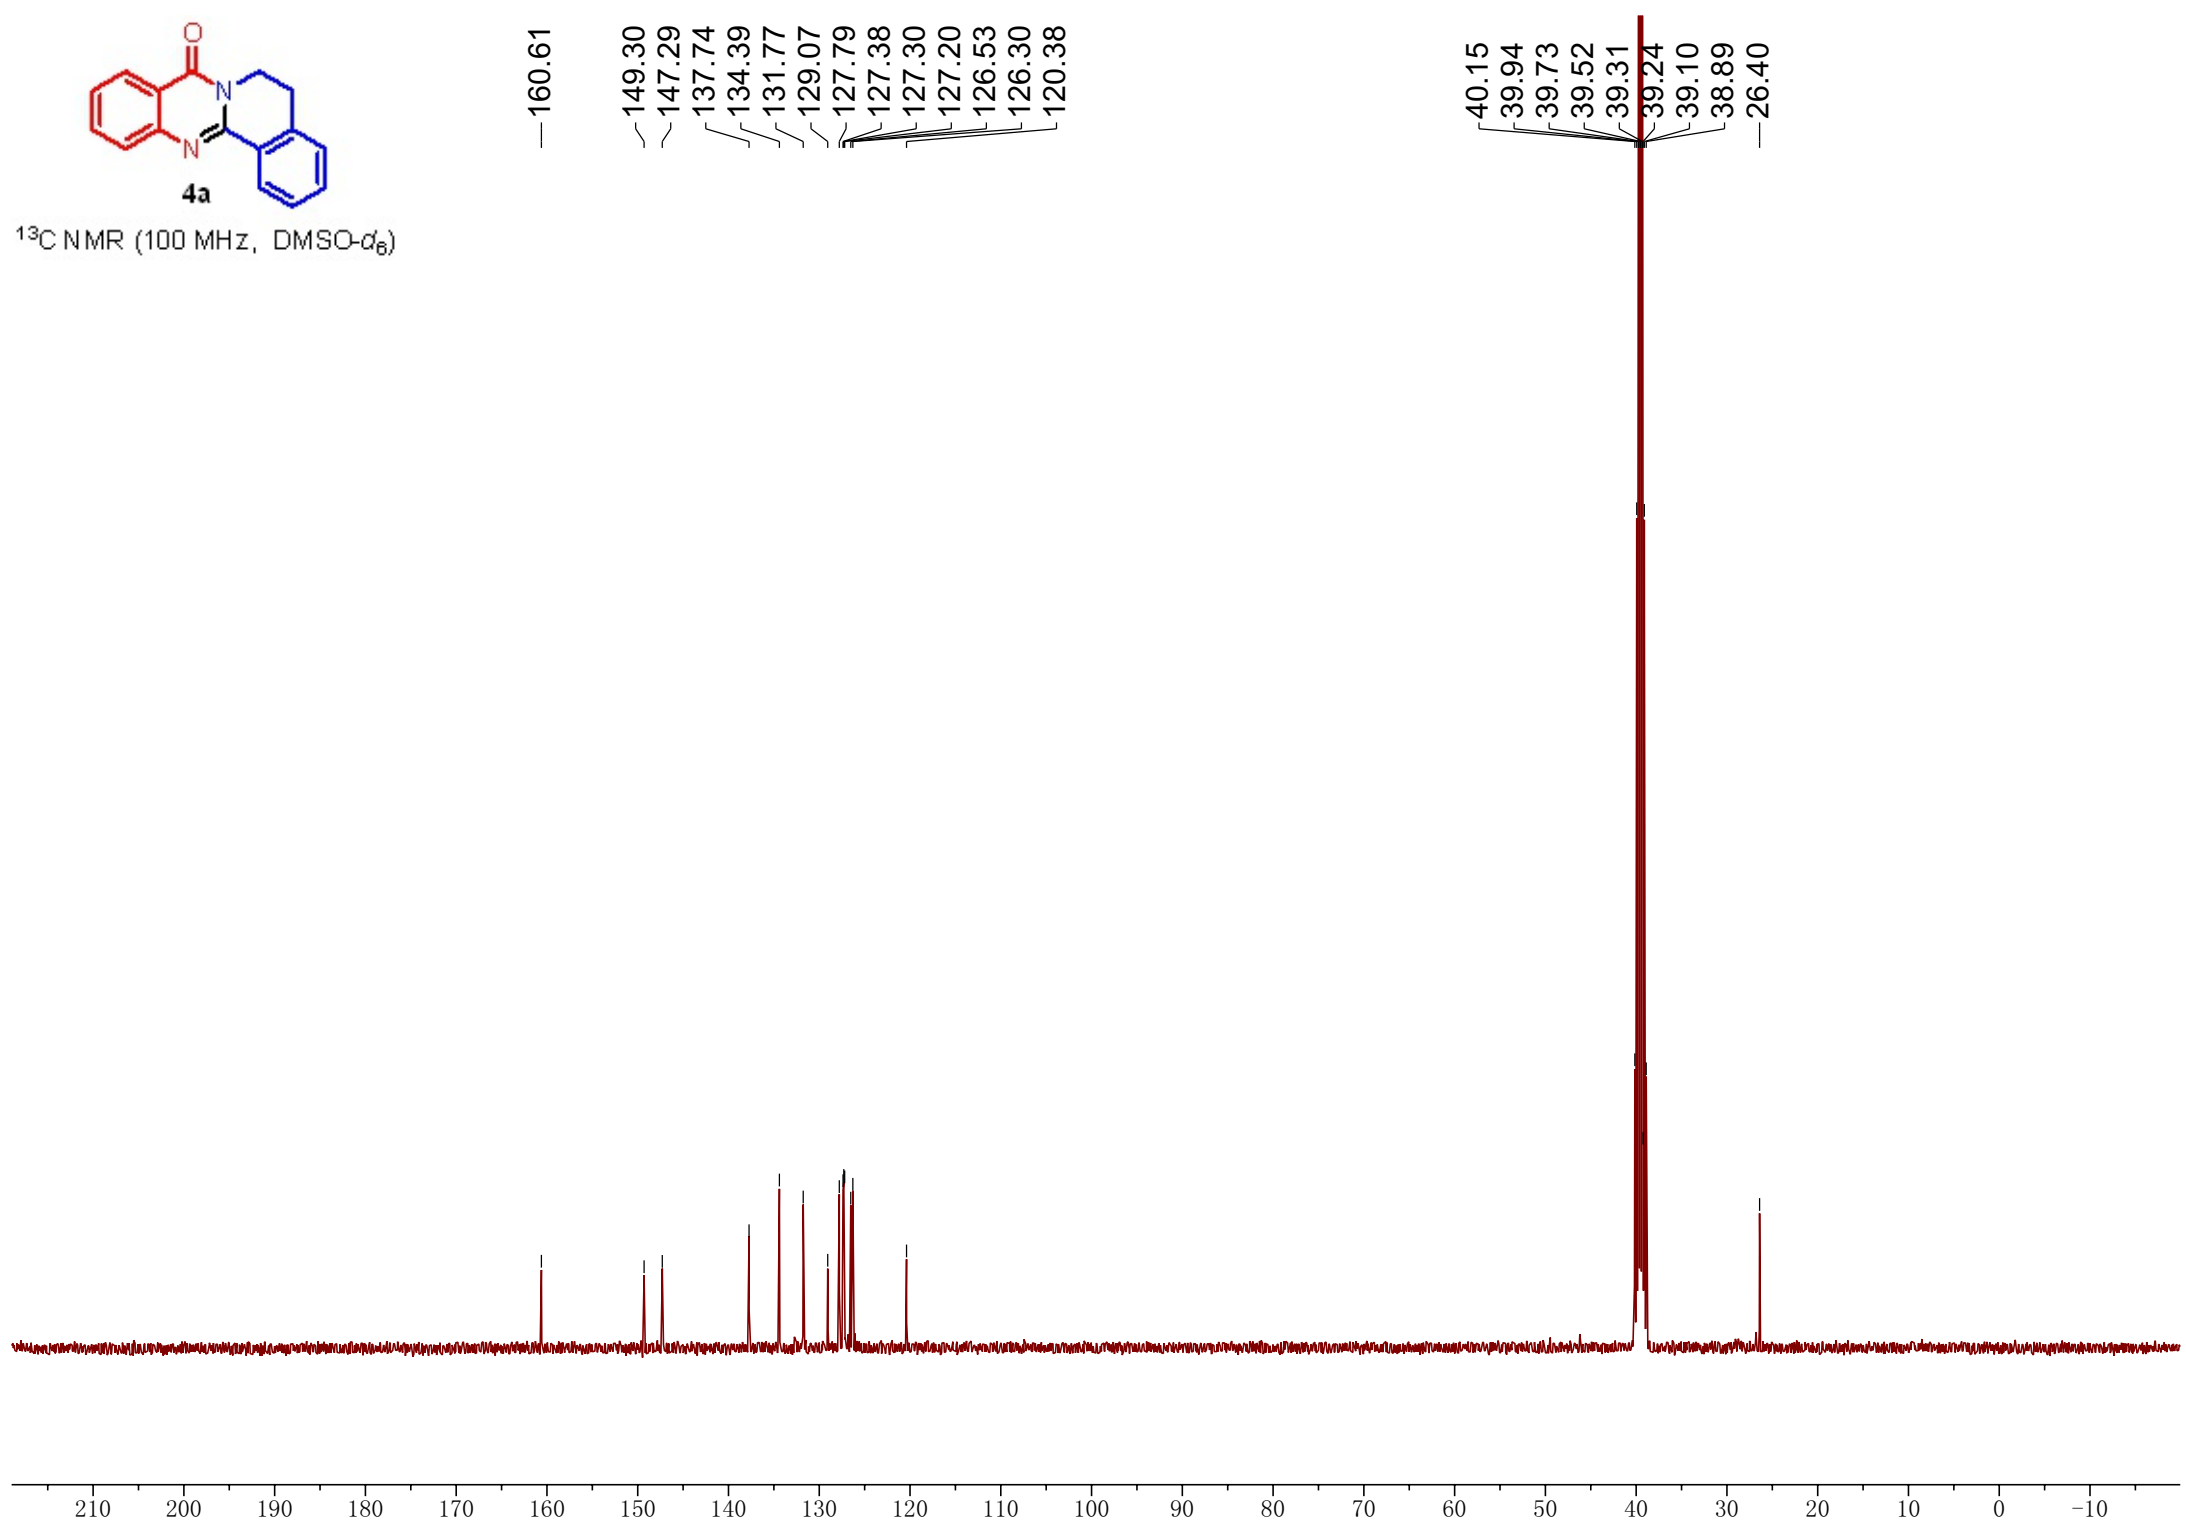

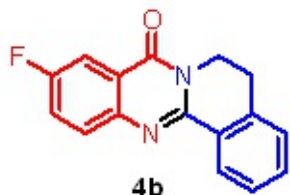

<sup>1</sup>H NMR (400 MHz, DMSO-*d*<sub>6</sub>)

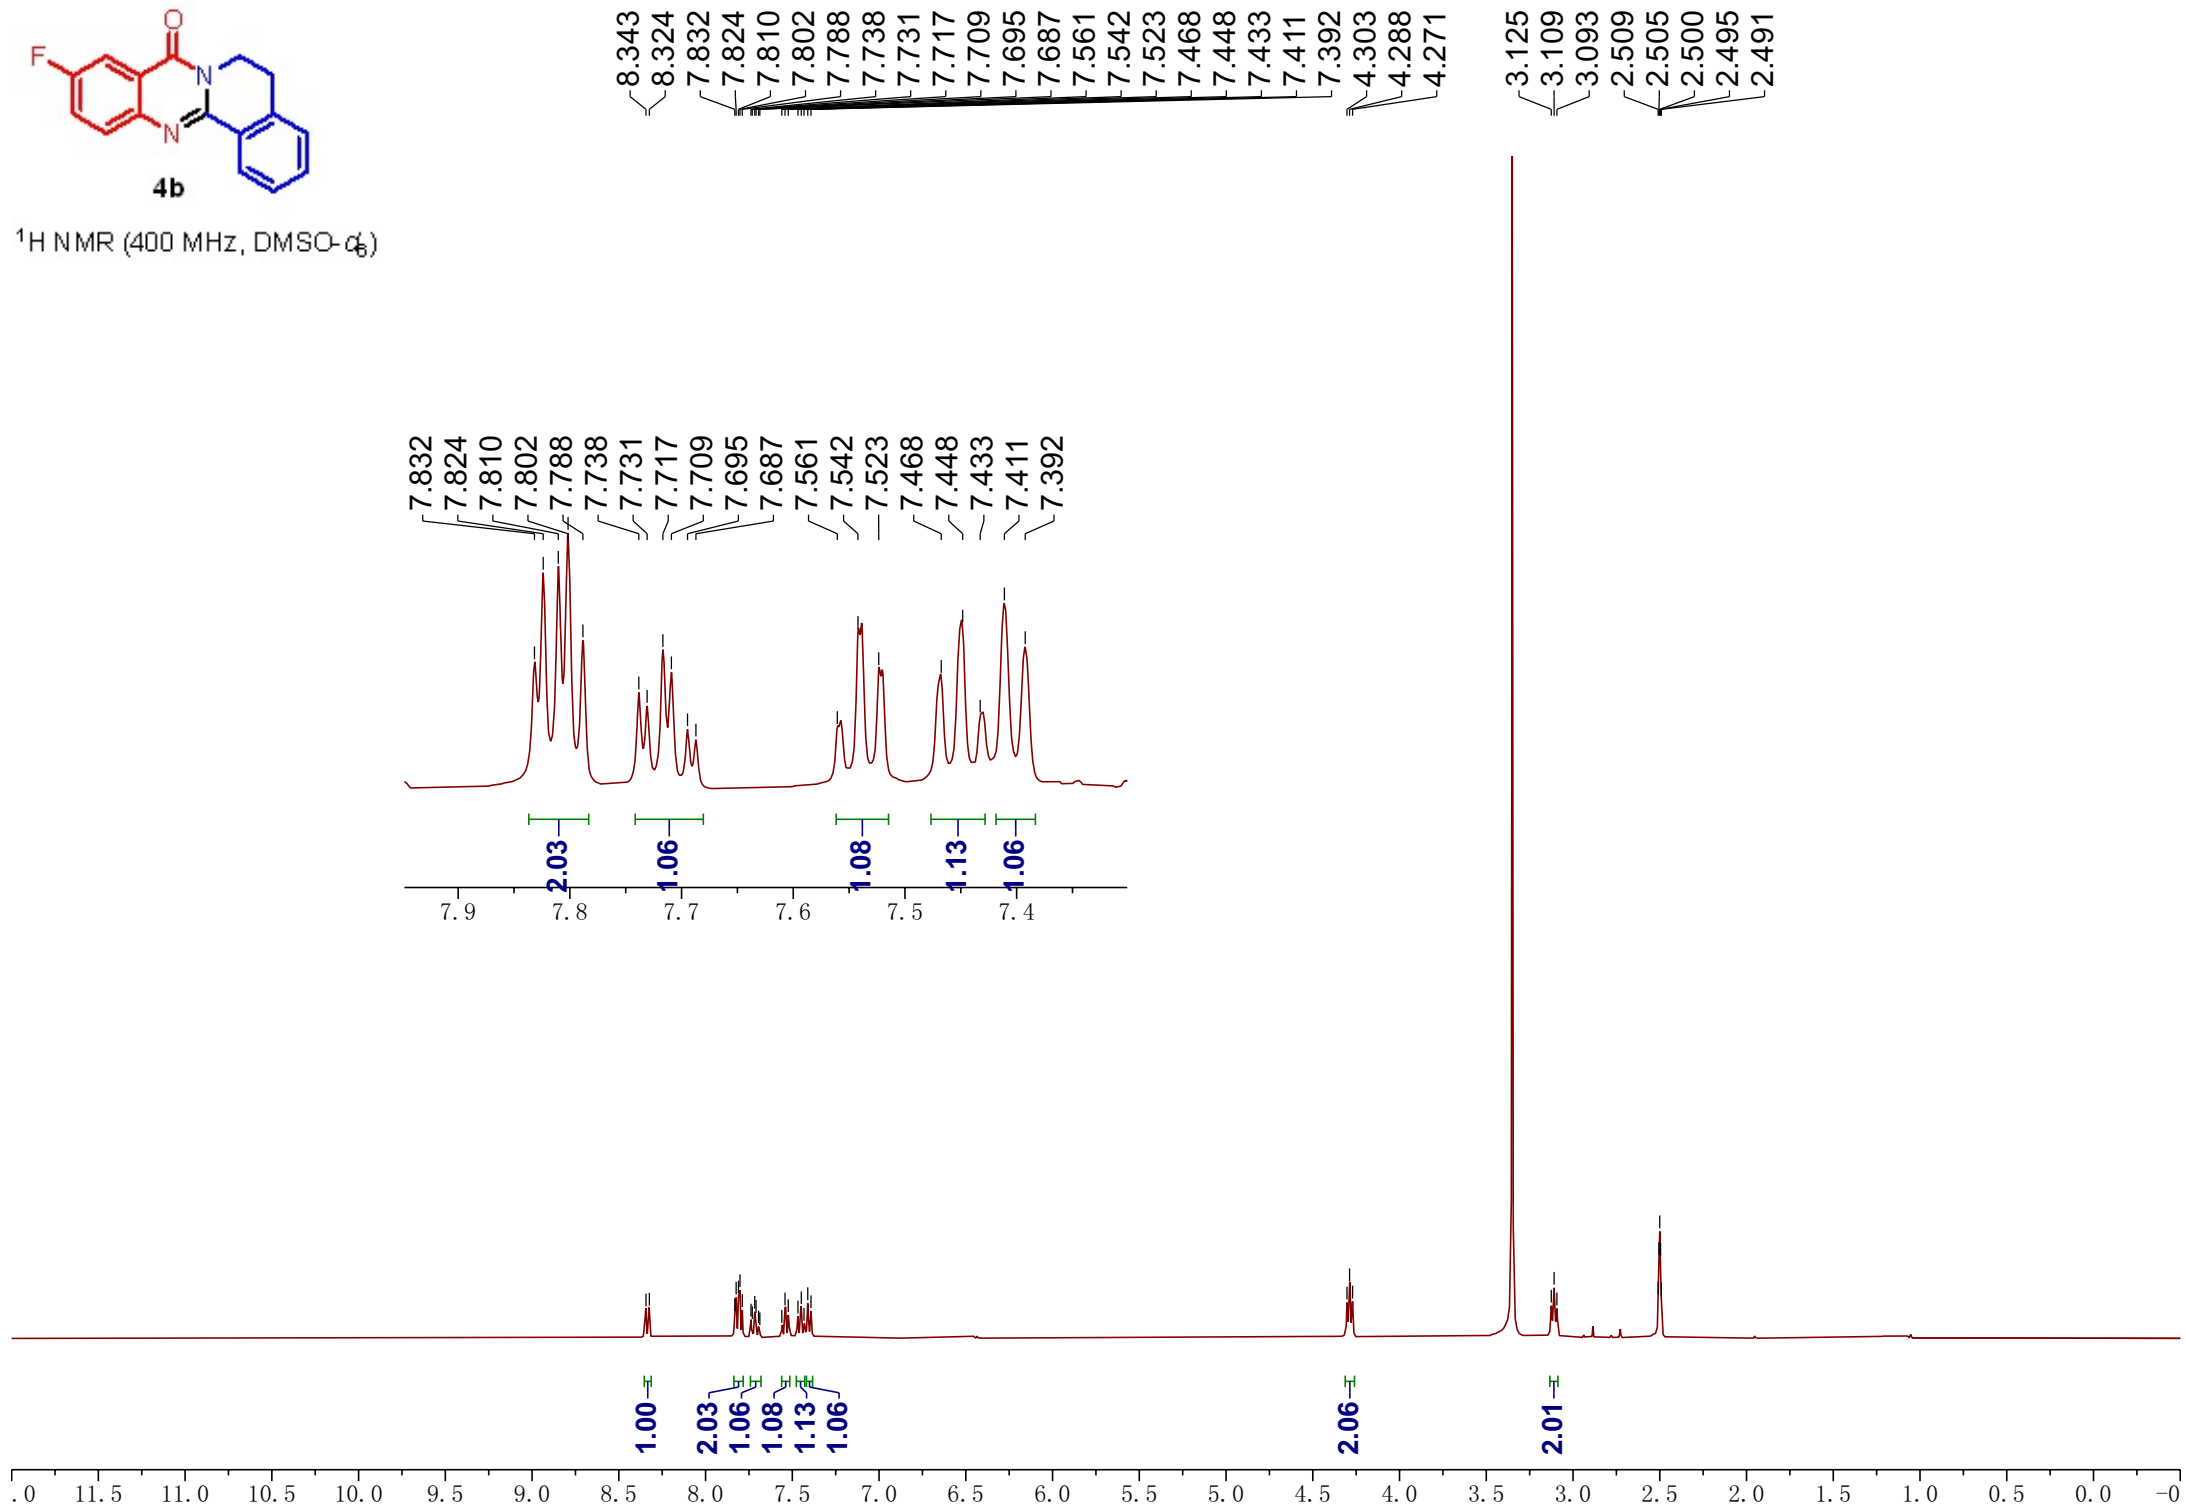



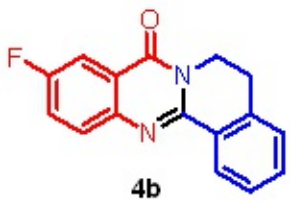

$^{13}\text{C}$  NMR (100 MHz,  $\text{CDCl}_3$ )

160.80  
148.61  
144.34  
136.76  
131.63  
129.85  
129.09  
127.68  
127.43  
122.79  
122.55  
121.68  
111.48  
111.25

77.48  
77.16  
76.84

39.60

27.15

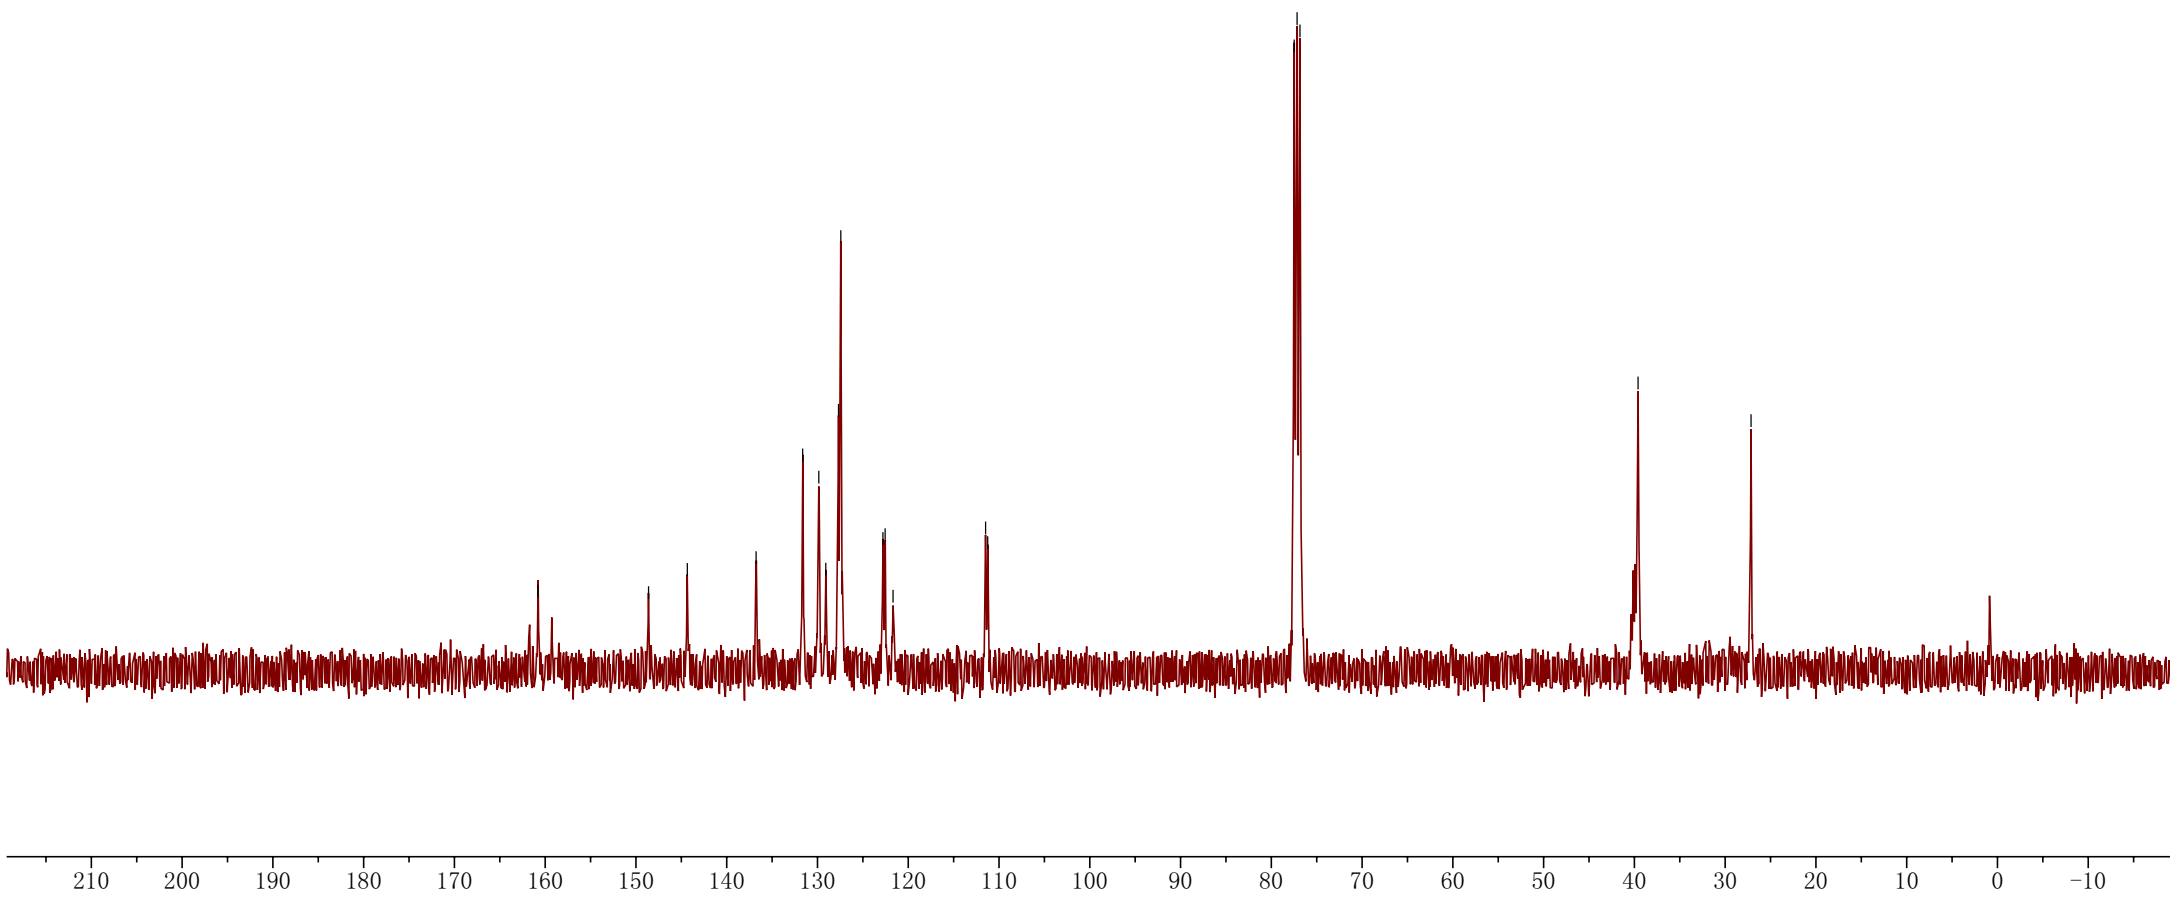

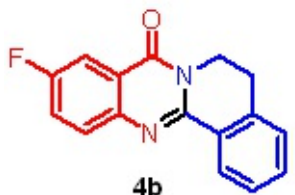

$^{19}\text{F}$  NMR (376 MHz,  $\text{CDCl}_3$ )

—113.21

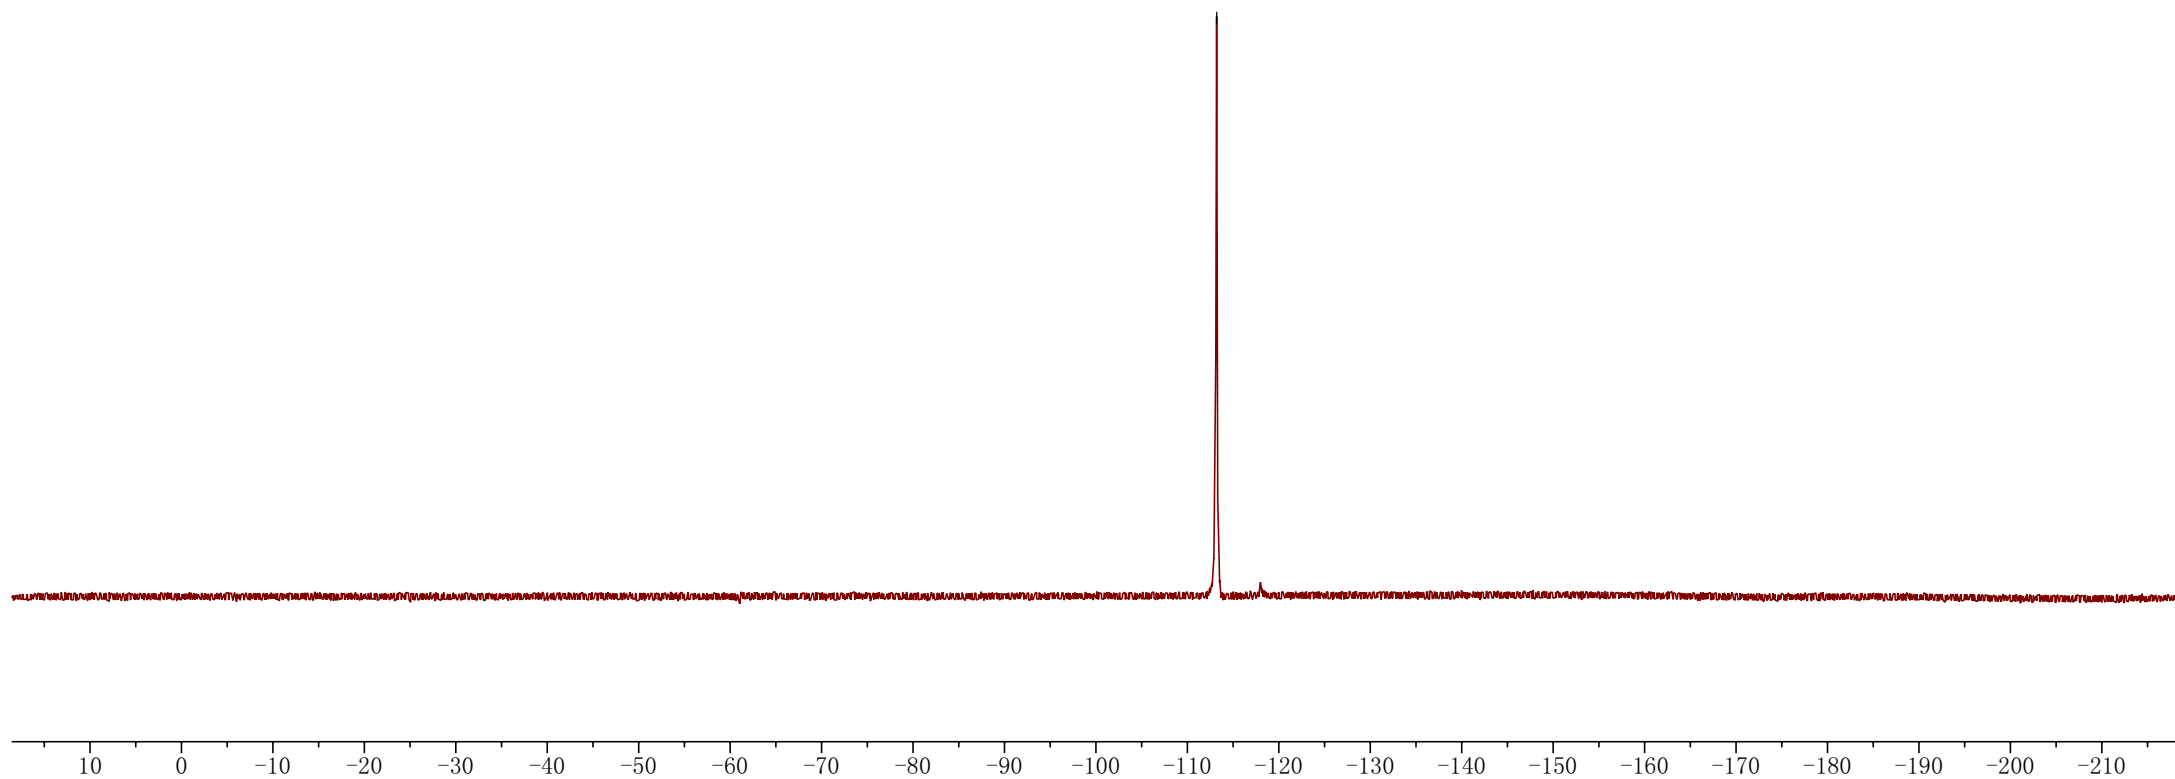

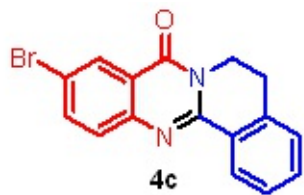

<sup>1</sup>H NMR (400 MHz, DMSO-*d*<sub>6</sub>)

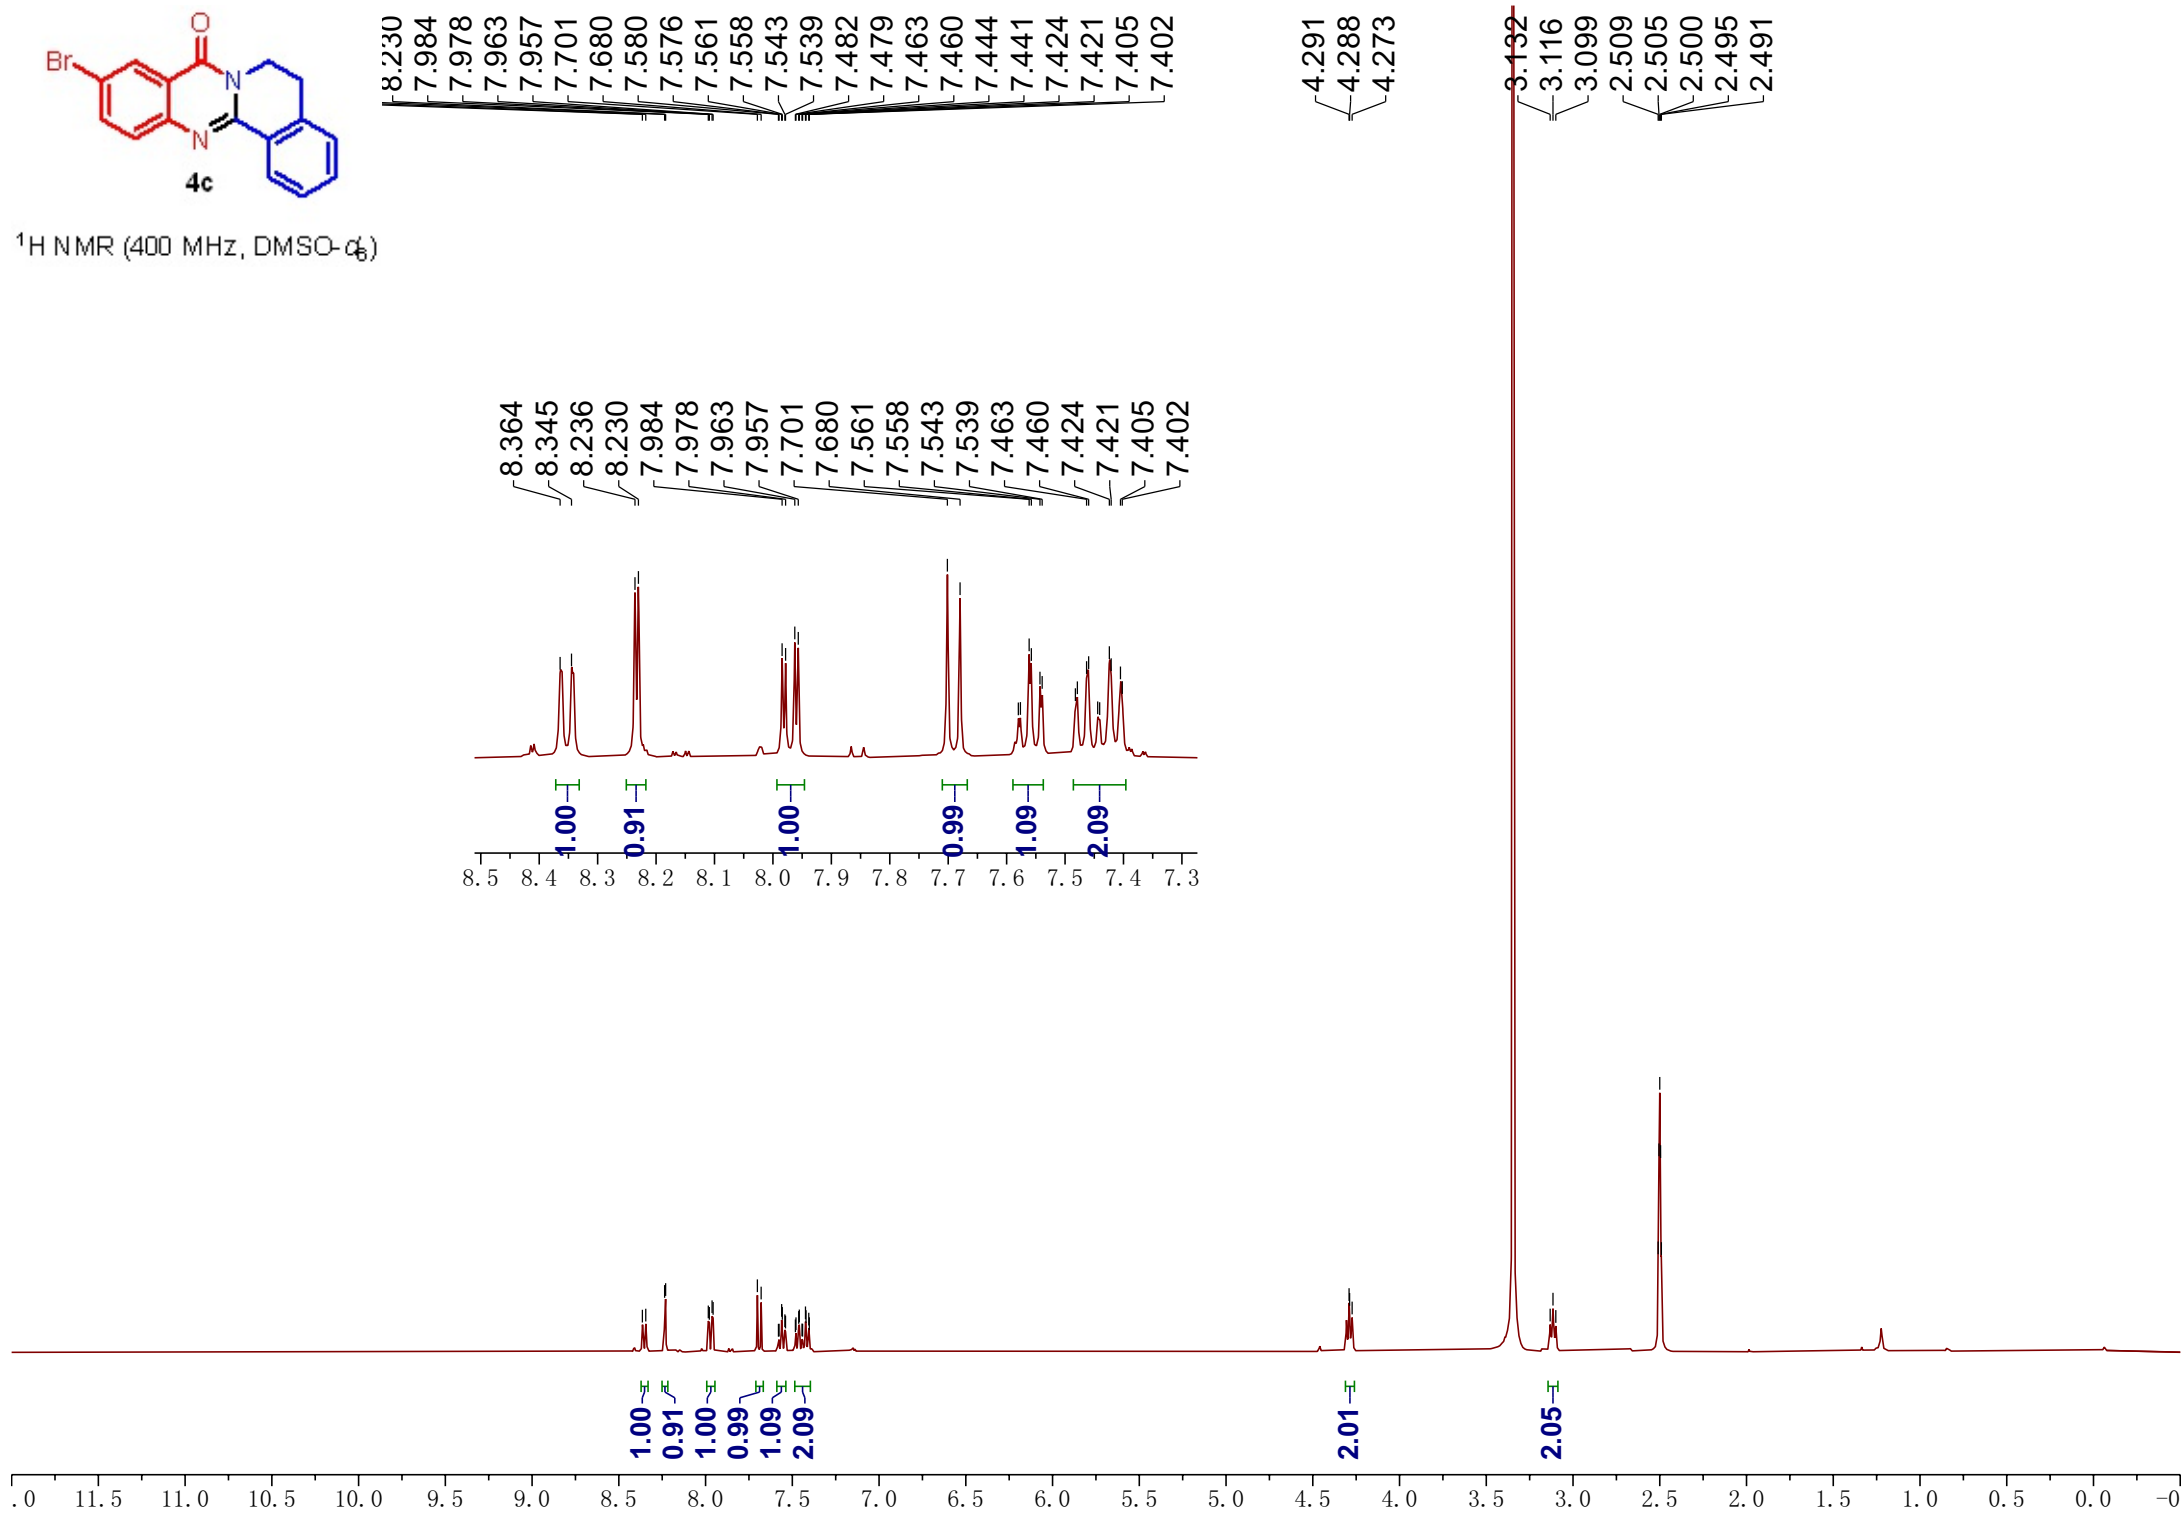

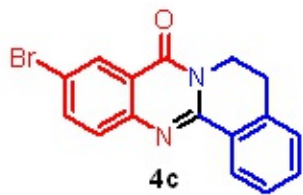

$^{13}\text{C}$  NMR (100 MHz,  $\text{CDCl}_3$ )

— 160.66  
— 149.84  
— 146.71  
— 137.49  
— 137.12  
— 132.08  
— 129.50  
— 129.47  
— 129.32  
— 128.13  
— 127.80  
— 127.67  
— 122.12  
— 120.03

{ 77.48  
— 77.16  
— 76.84

— 39.85

— 27.42

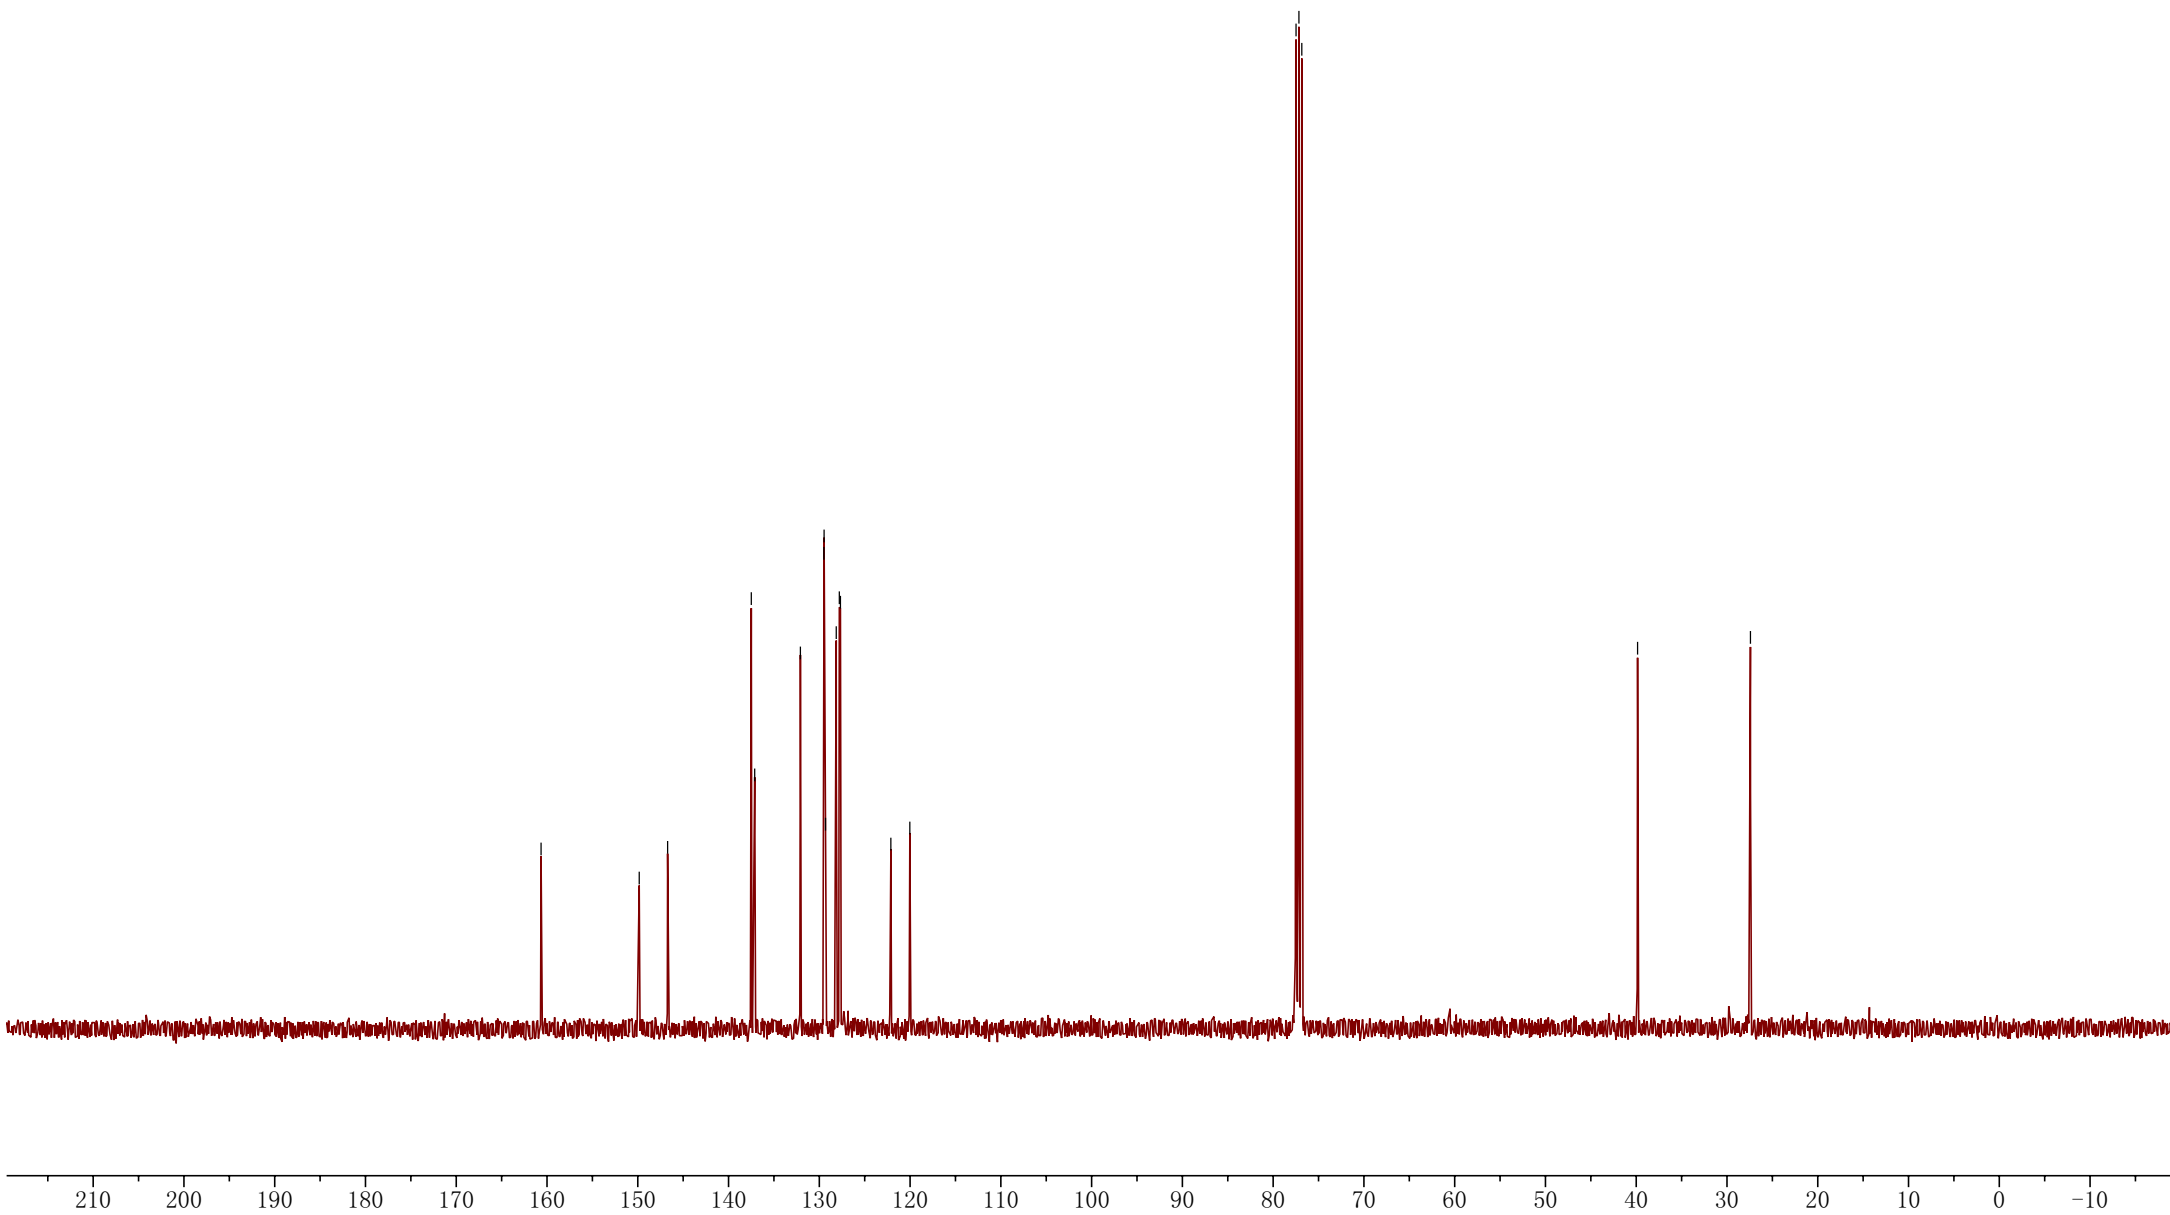

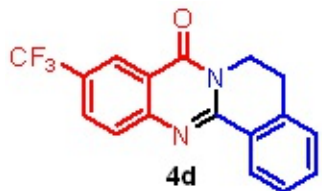

<sup>1</sup>H NMR (400 MHz, CDCl<sub>3</sub>)

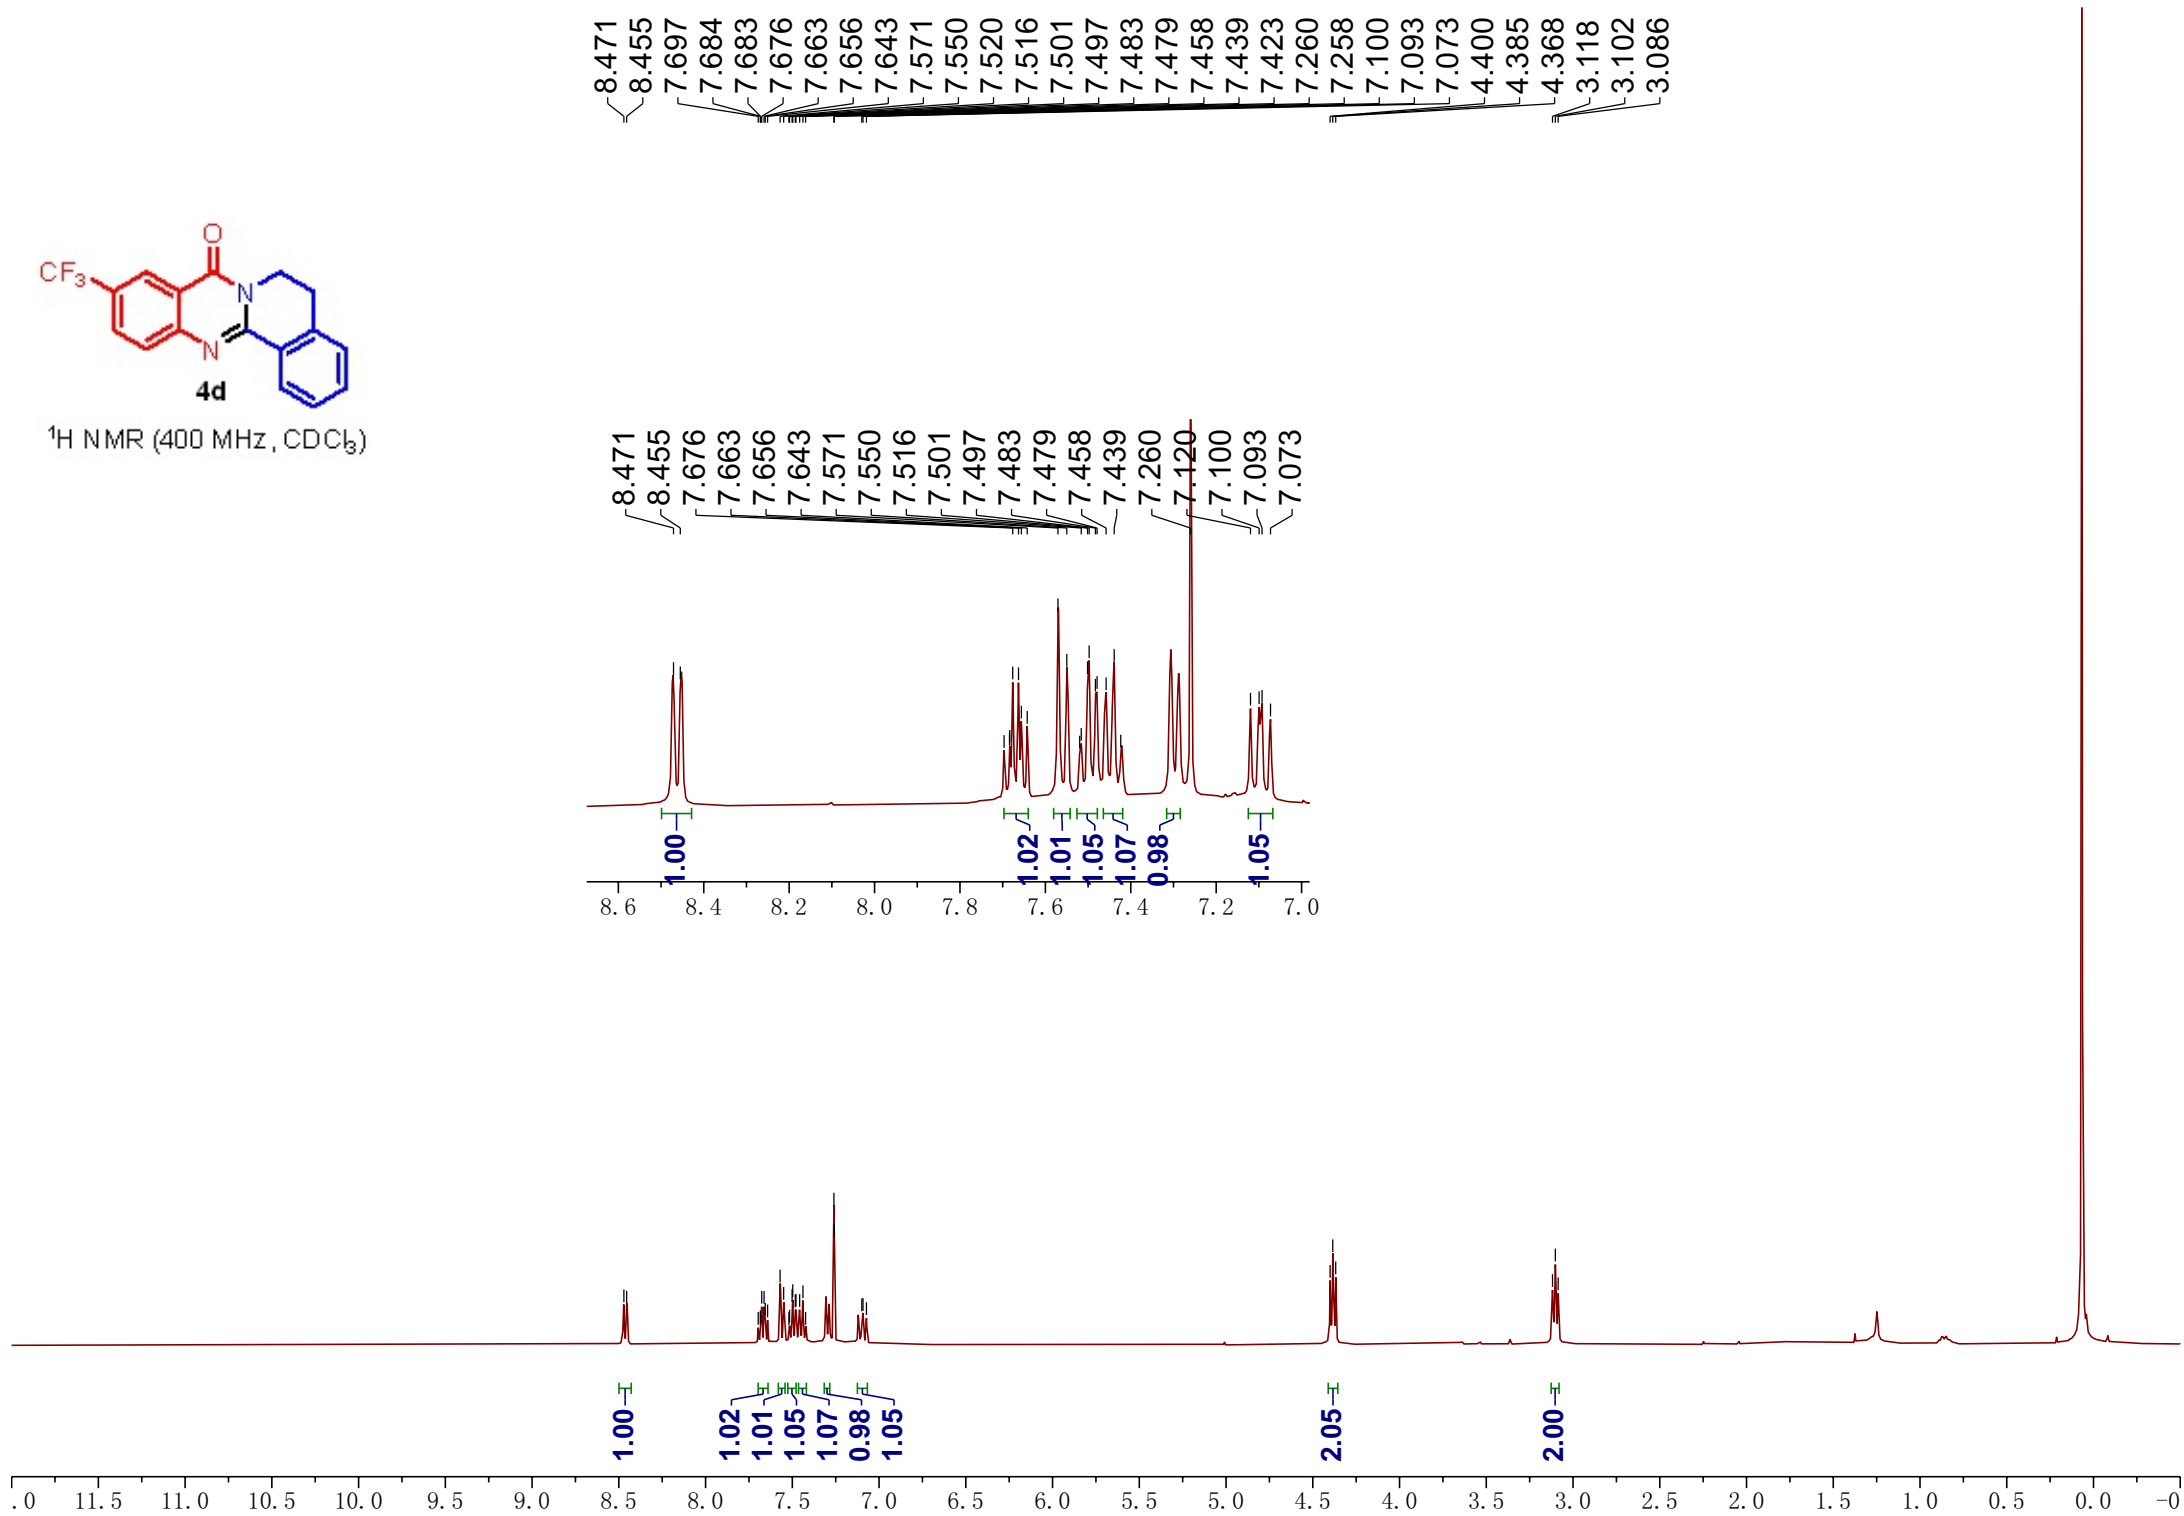

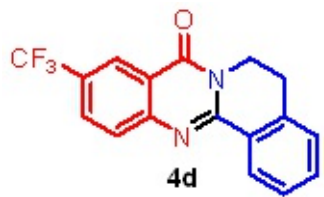

$^{13}\text{C}$  NMR (100 MHz,  $\text{CDCl}_3$ )

162.82  
160.18  
159.02  
158.98  
150.45  
150.44  
149.97  
137.38  
134.67  
134.57  
132.23  
129.24  
128.25  
127.82  
127.71  
123.69  
123.65  
113.21  
113.00  
110.61  
110.54

77.48  
77.16  
76.84

—39.36

—27.50

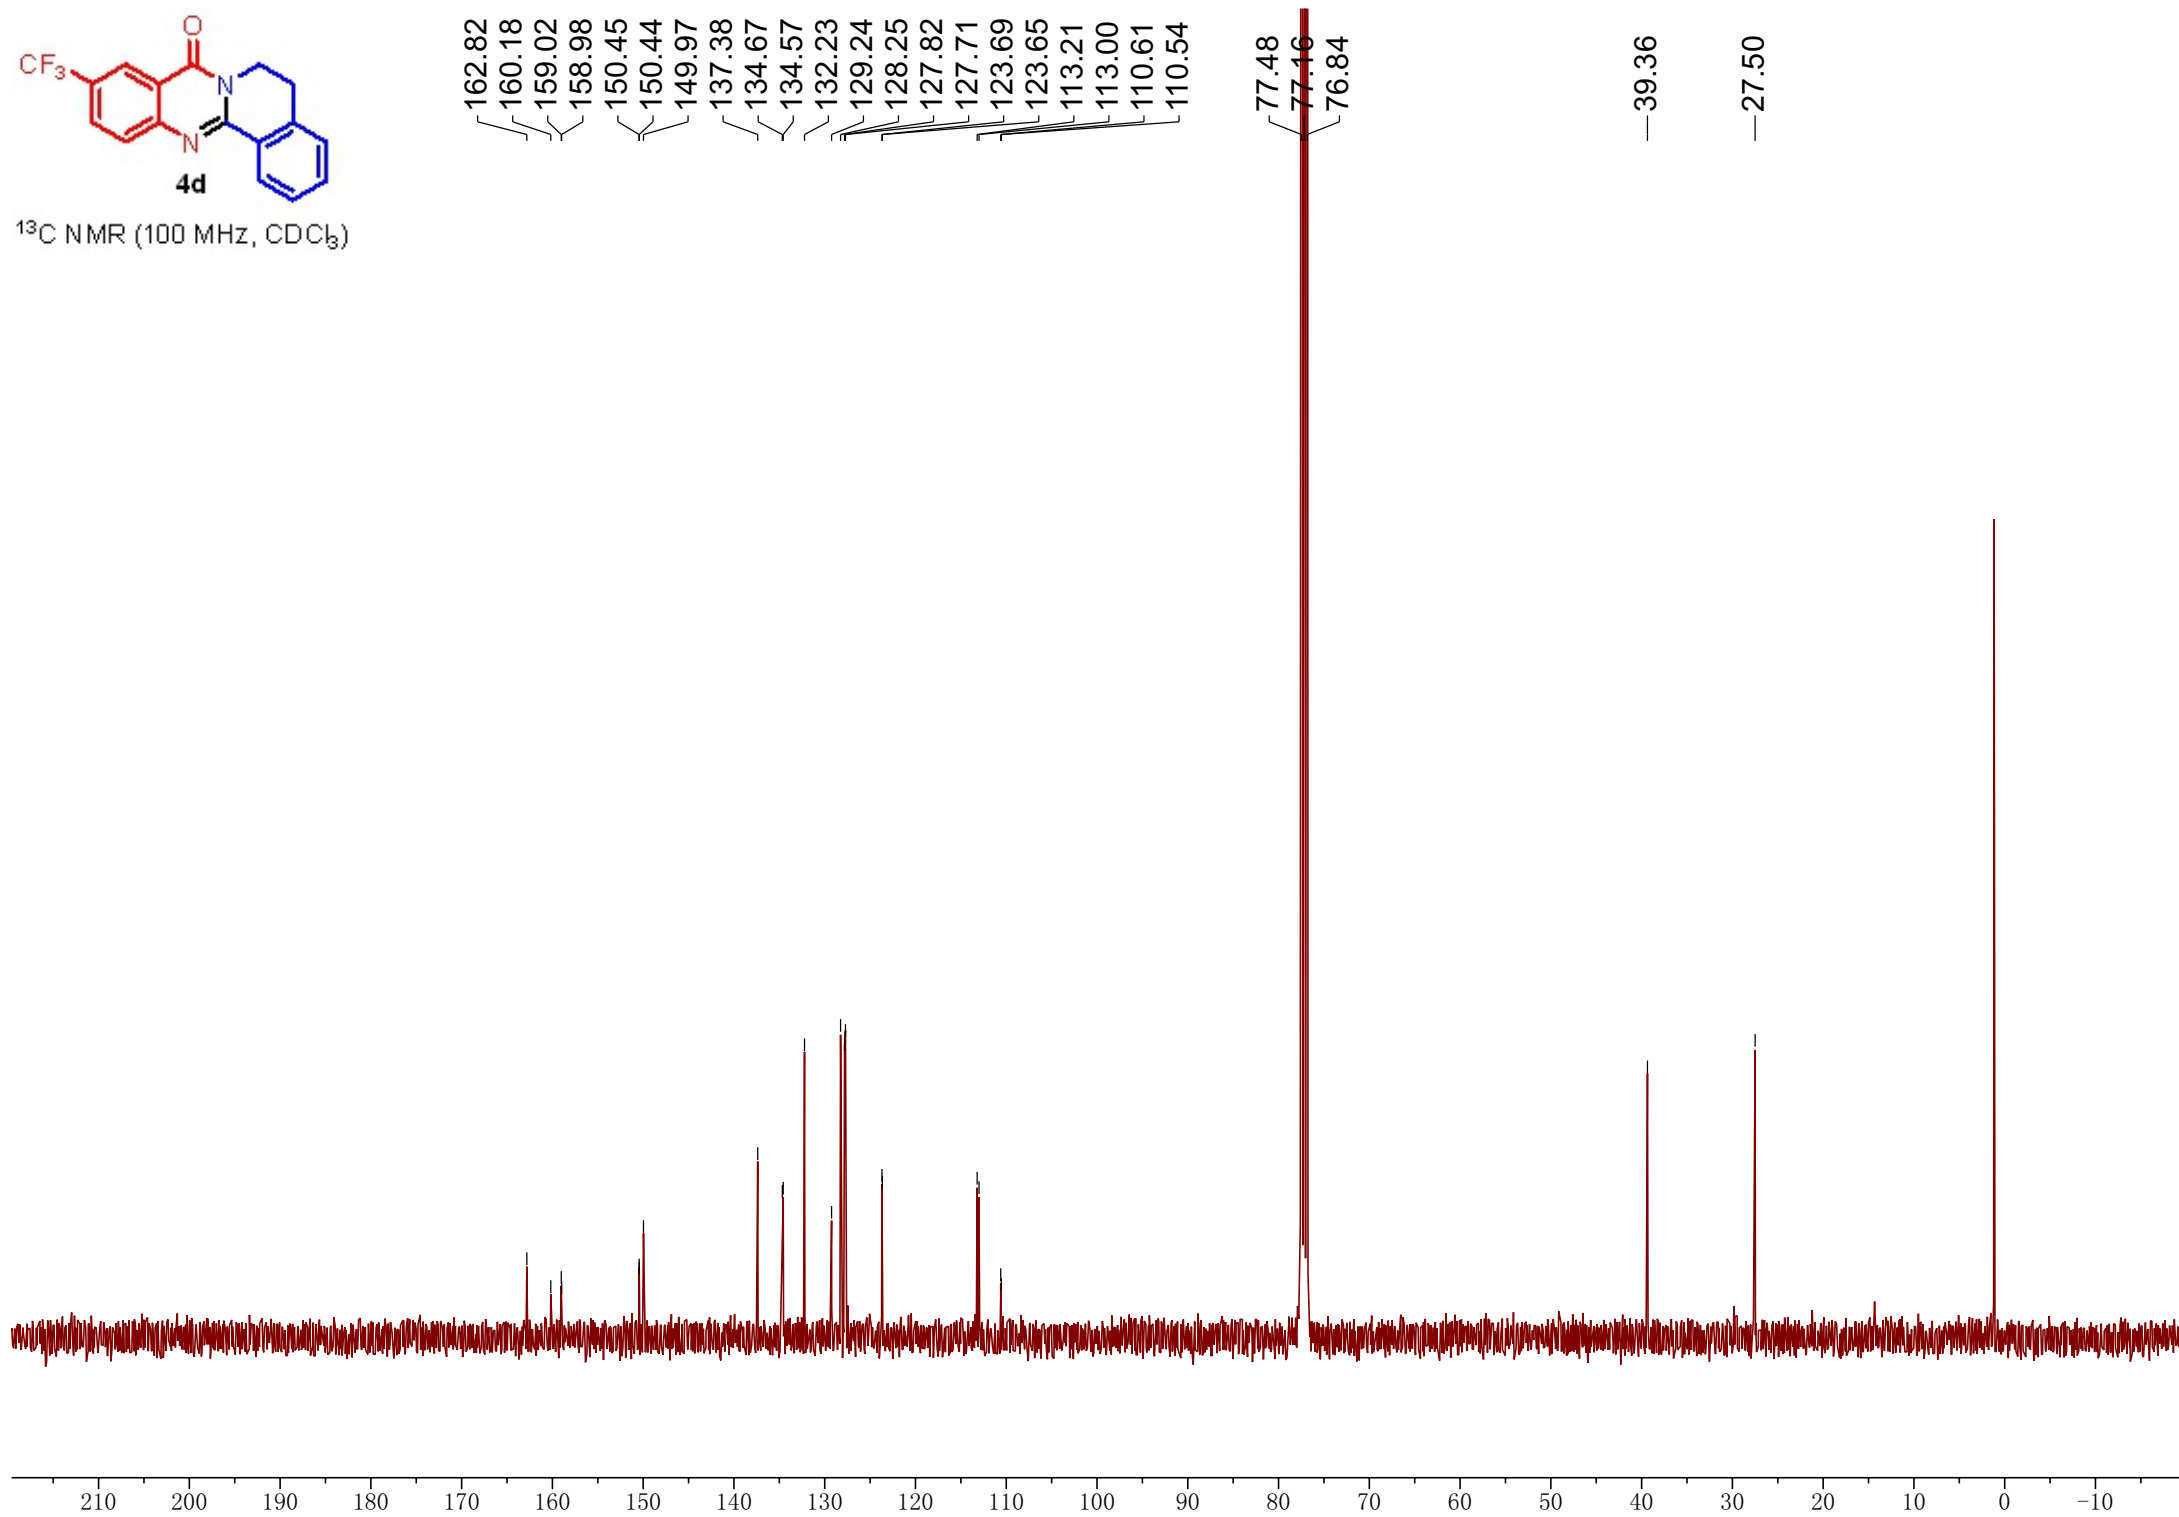

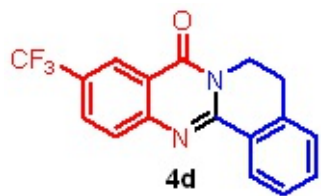

$^{19}\text{F}$  NMR (376 MHz,  $\text{CDCl}_3$ )

---111.813

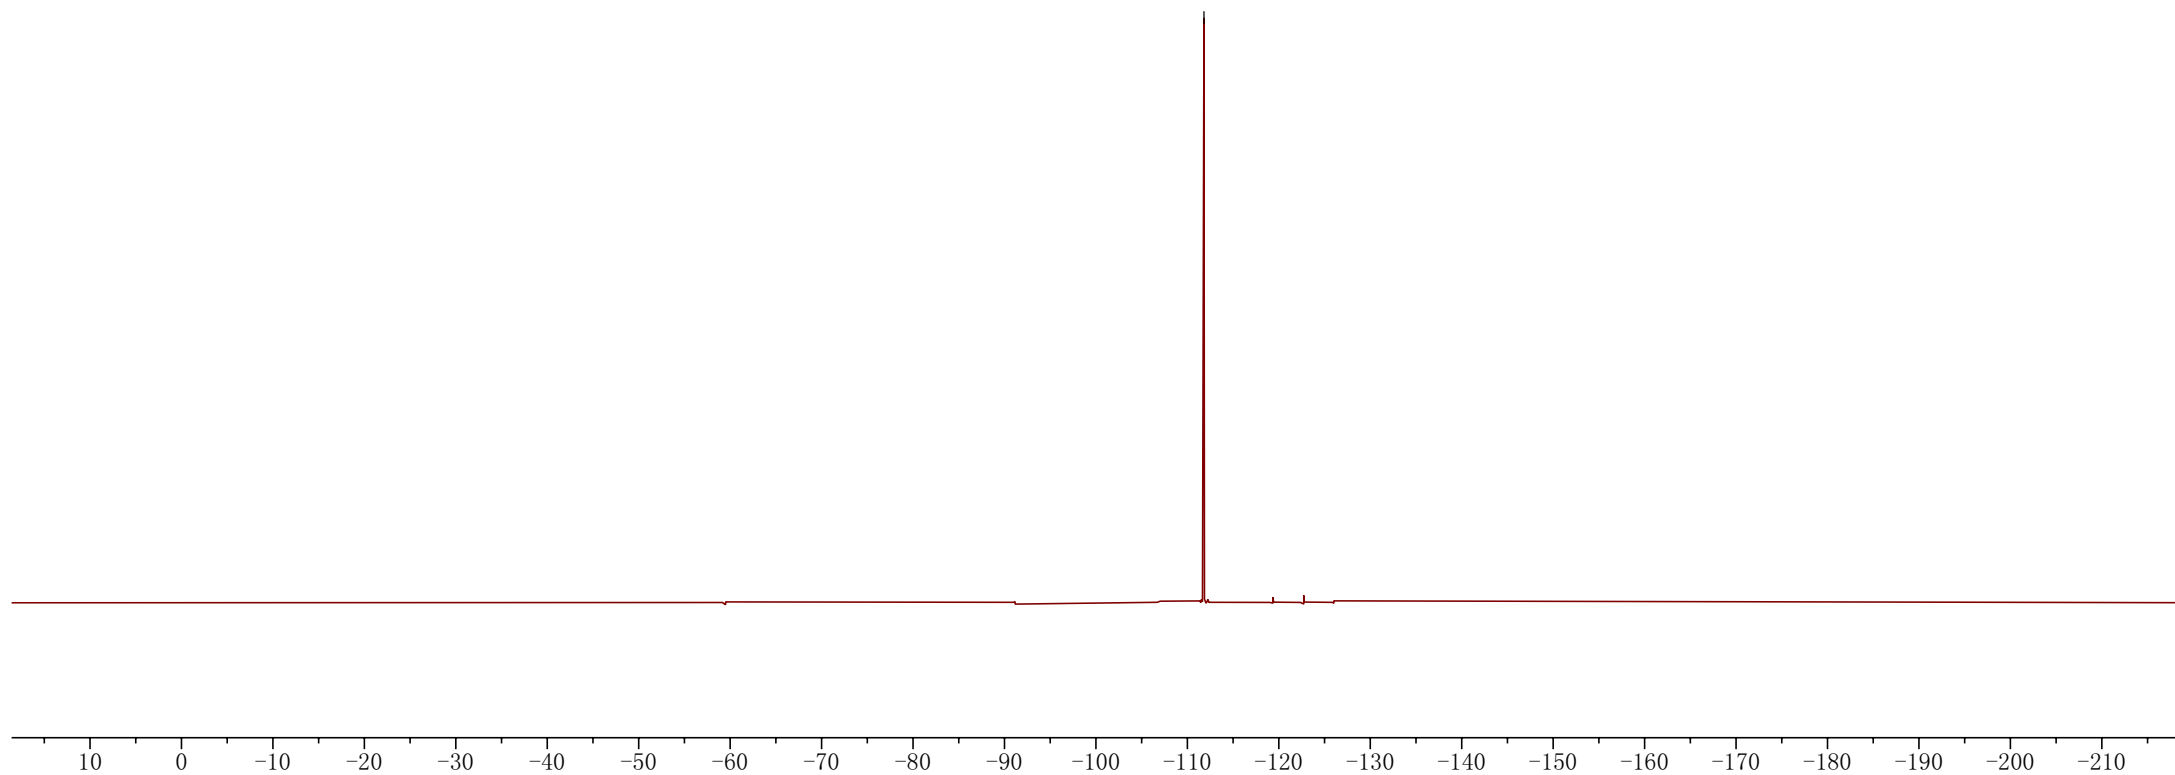

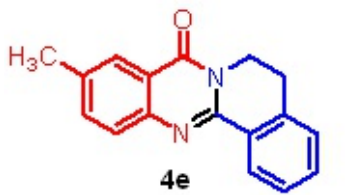

<sup>1</sup>H NMR (400 MHz, CDCl<sub>3</sub>)

8.547  
8.544  
8.529  
8.524  
8.170  
8.150  
7.607  
7.589  
7.492  
7.488  
7.473  
7.469  
7.456  
7.451  
7.436  
7.432  
7.418  
7.413  
7.361  
7.342  
7.323  
7.286  
7.272  
7.260  
4.427  
4.412  
4.395

3.116  
3.100  
3.084  
2.710

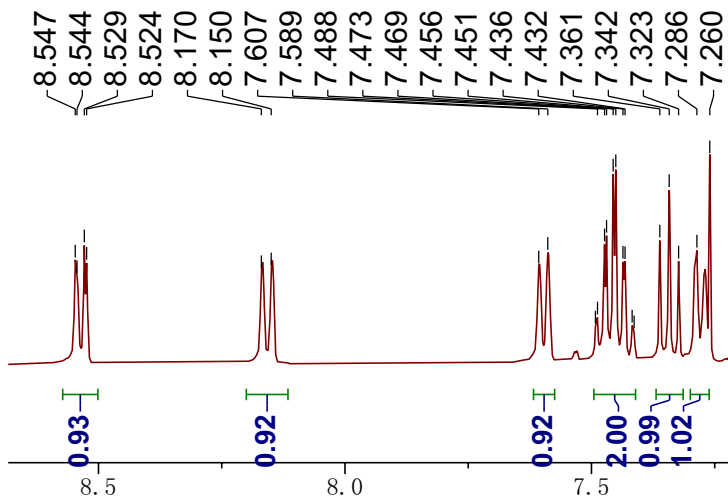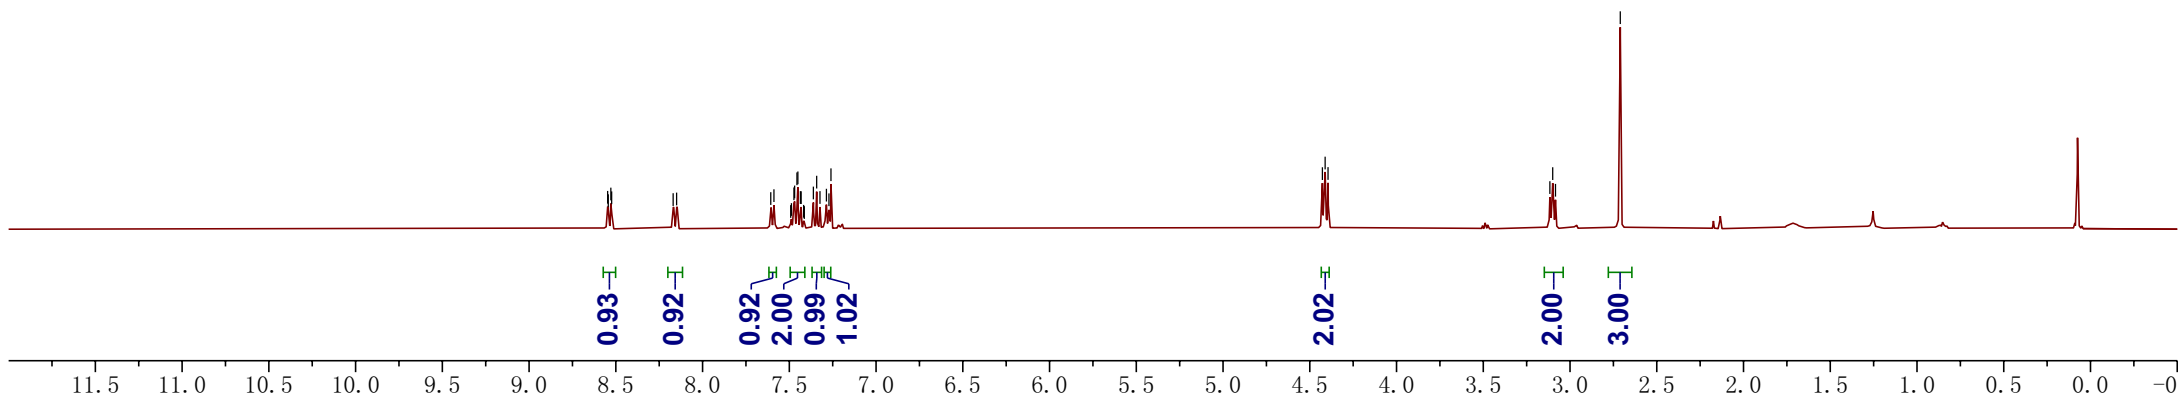



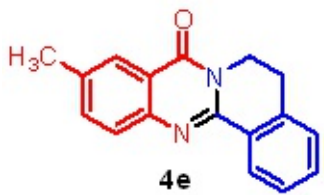

$^{13}\text{C}$  NMR (100 MHz,  $\text{CDCl}_3$ )

— 162.23

— 148.14

— 146.41

— 137.08

— 136.25

— 134.86

— 131.68

— 130.10

— 128.18

— 127.69

— 127.61

— 126.27

— 124.66

— 120.81

— 77.48

— 77.16

— 76.84

— 39.68

— 27.58

— 17.43

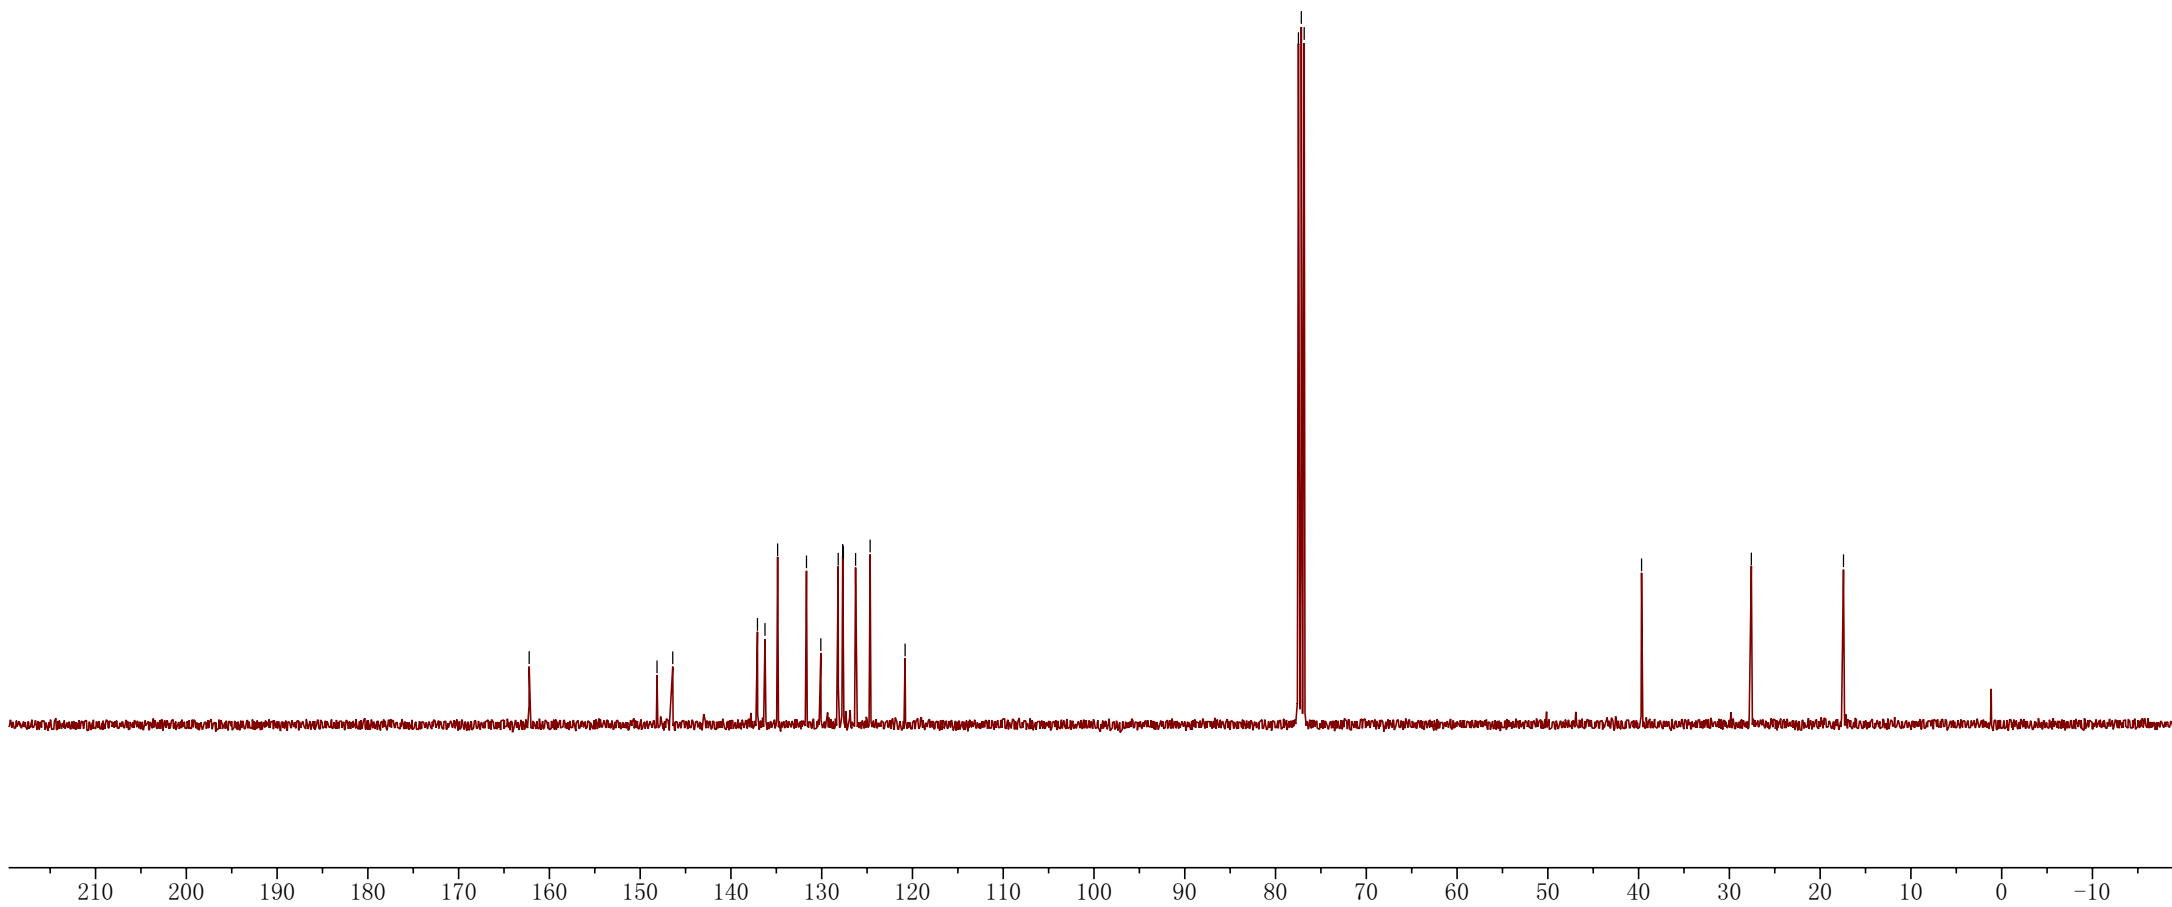

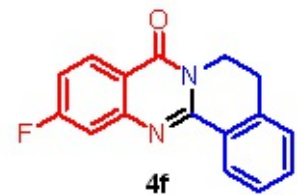

<sup>1</sup>H NMR (400 MHz, CDCl<sub>3</sub>)

8.469  
8.449  
8.323  
8.308  
8.301  
8.286  
7.507  
7.492  
7.488  
7.474  
7.470  
7.452  
7.433  
7.408  
7.402  
7.384  
7.378  
7.297  
7.278  
7.260  
7.187  
7.181  
7.166  
7.159  
7.145  
7.138  
4.409  
4.393  
4.376  
3.116  
3.100  
3.084

8.469  
8.449  
8.323  
8.308  
8.301  
8.286  
7.492  
7.488  
7.474  
7.470  
7.433  
7.408  
7.402  
7.384  
7.378  
7.297  
7.278  
7.260  
7.166  
7.159

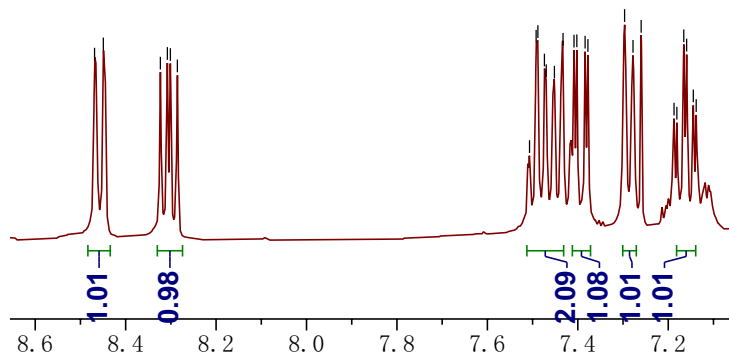

1.01  
0.98  
2.09  
1.08  
1.01  
1.01  
2.01  
2.00

11.5  
11.0  
10.5  
10.0  
9.5  
9.0  
8.5  
8.0  
7.5  
7.0  
6.5  
6.0  
5.5  
5.0  
4.5  
4.0  
3.5  
3.0  
2.5  
2.0  
1.5  
1.0  
0.5  
0.0

167.89  
165.37  
161.16  
150.69  
150.15  
150.02  
137.29  
132.19  
129.75  
129.64  
129.38  
128.30  
127.82  
127.68  
117.62  
117.60  
115.56  
115.33  
112.91  
112.69

77.48  
77.16  
76.84

39.68

27.50

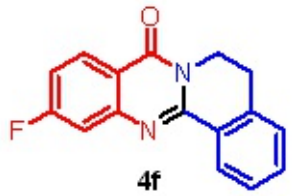

<sup>13</sup>C NMR (100 MHz, CDCl<sub>3</sub>)

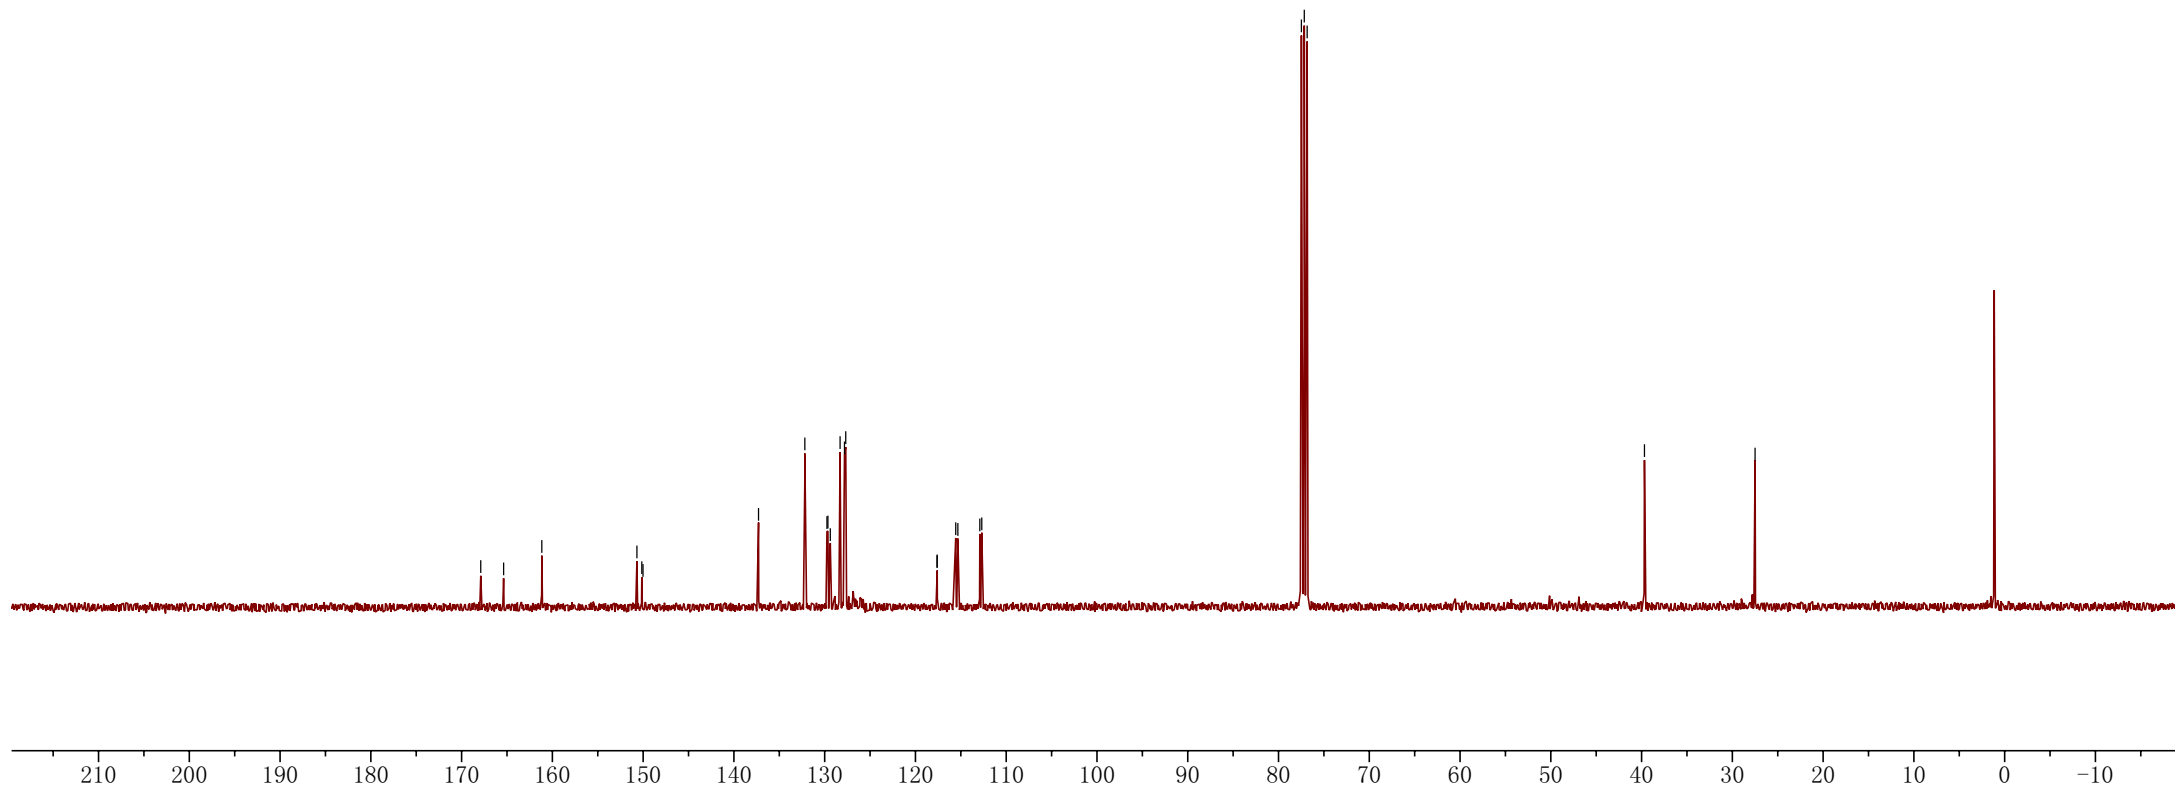

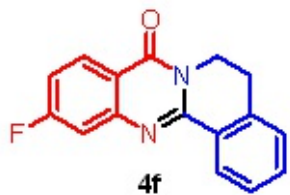

$^{19}\text{F}$  NMR (376 MHz,  $\text{CDCl}_3$ )

---103.88

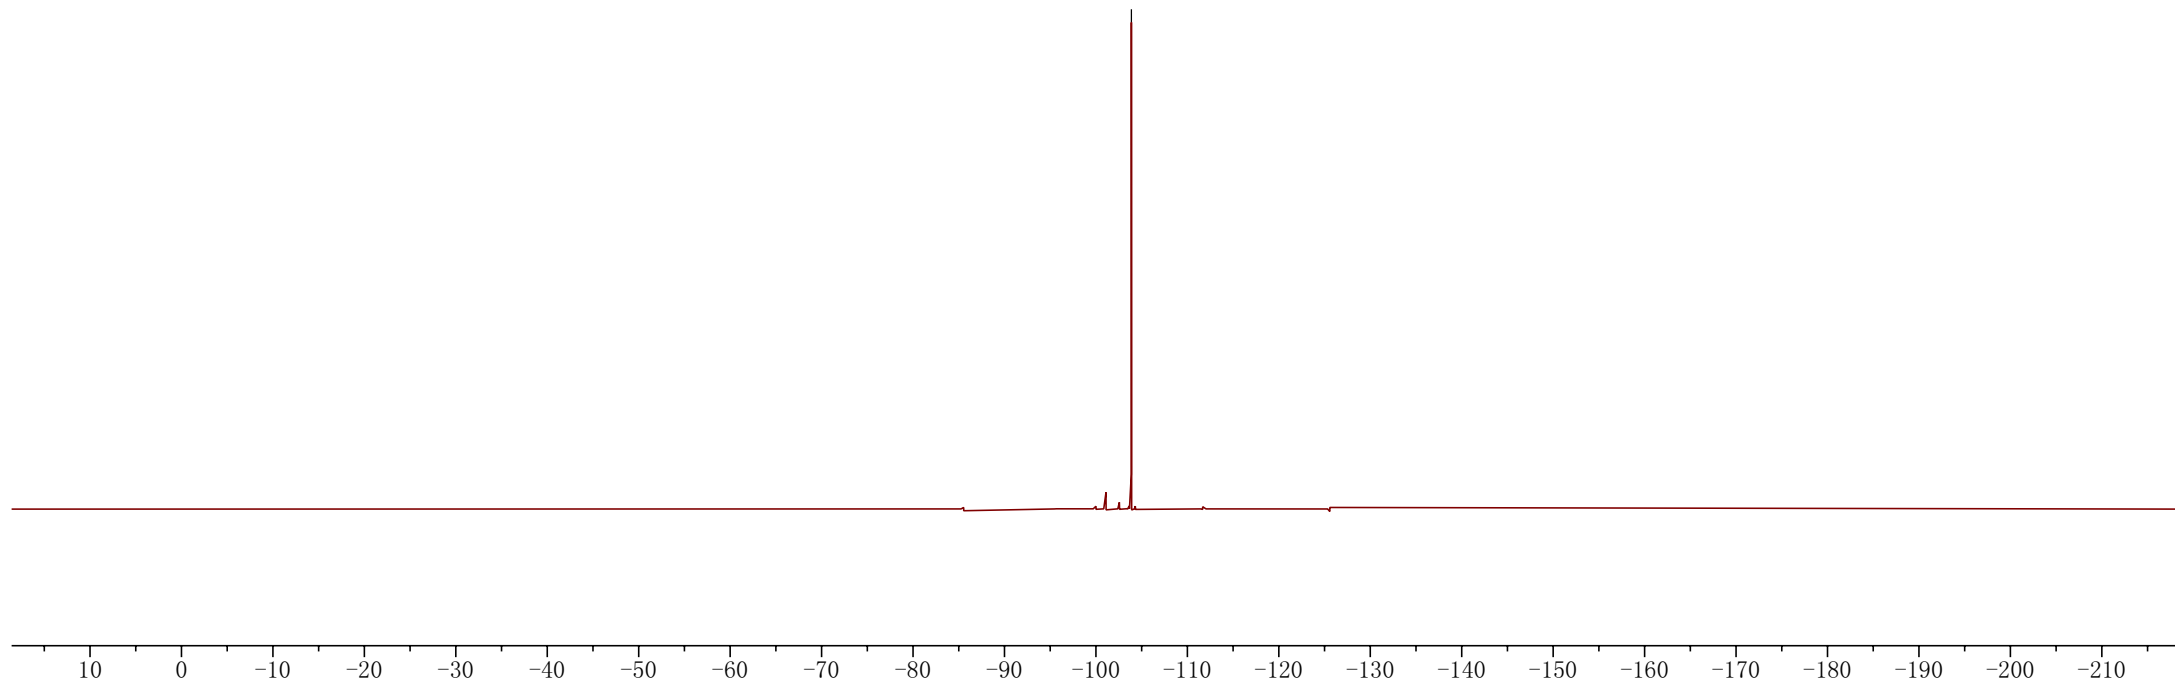

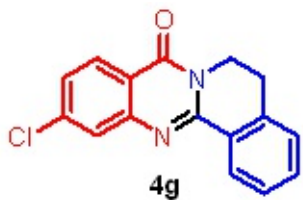

<sup>1</sup>H NMR (400 MHz, CDCl<sub>3</sub>)

8.456  
8.452  
8.437  
8.433  
8.228  
8.207  
7.753  
7.748  
7.509  
7.506  
7.491  
7.487  
7.473  
7.435  
7.431  
7.403  
7.398  
7.381  
7.376  
7.295  
7.276  
7.260  
4.404  
4.388  
4.371  
3.116  
3.099  
3.083

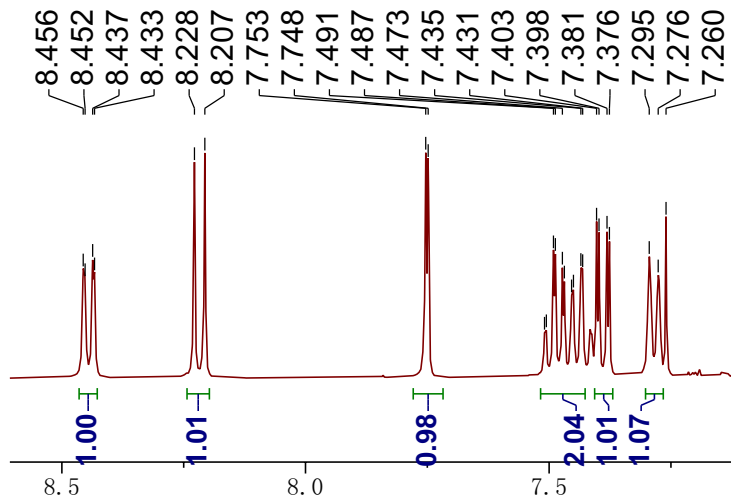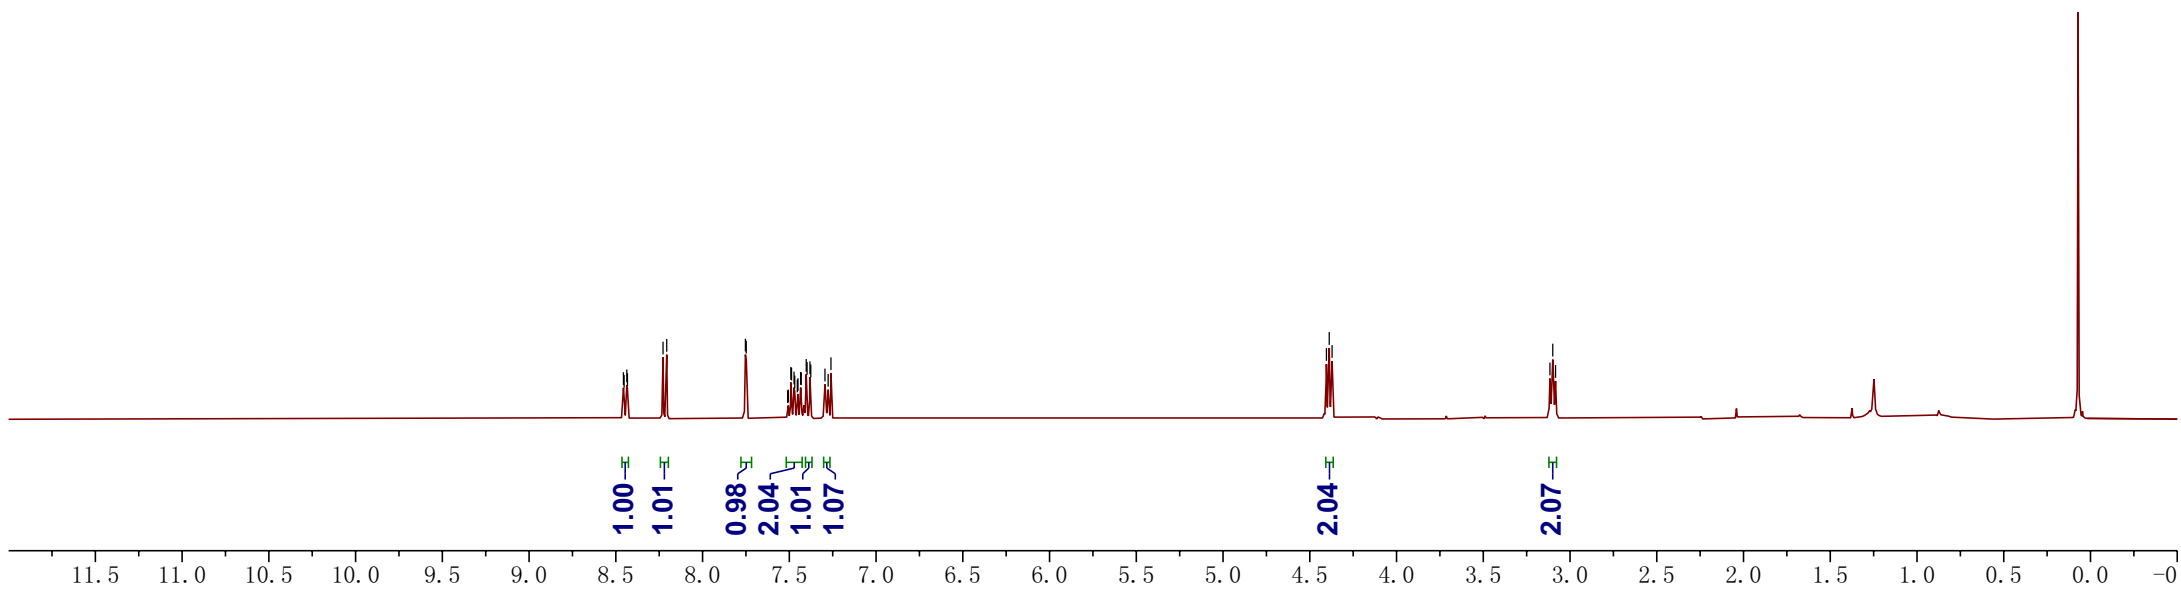

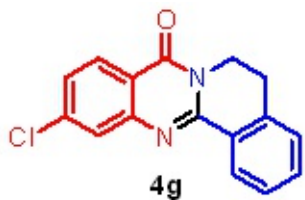

$^{13}\text{C}$  NMR (100 MHz,  $\text{CDCl}_3$ )

— 161.28  
— 150.65  
— 148.89  
— 140.49  
— 137.24  
— 132.21  
— 129.33  
— 128.47  
— 128.29  
— 127.83  
— 127.68  
— 127.20  
— 127.18  
— 119.29

— 77.48  
— 77.16  
— 76.84

— 39.74

— 27.45

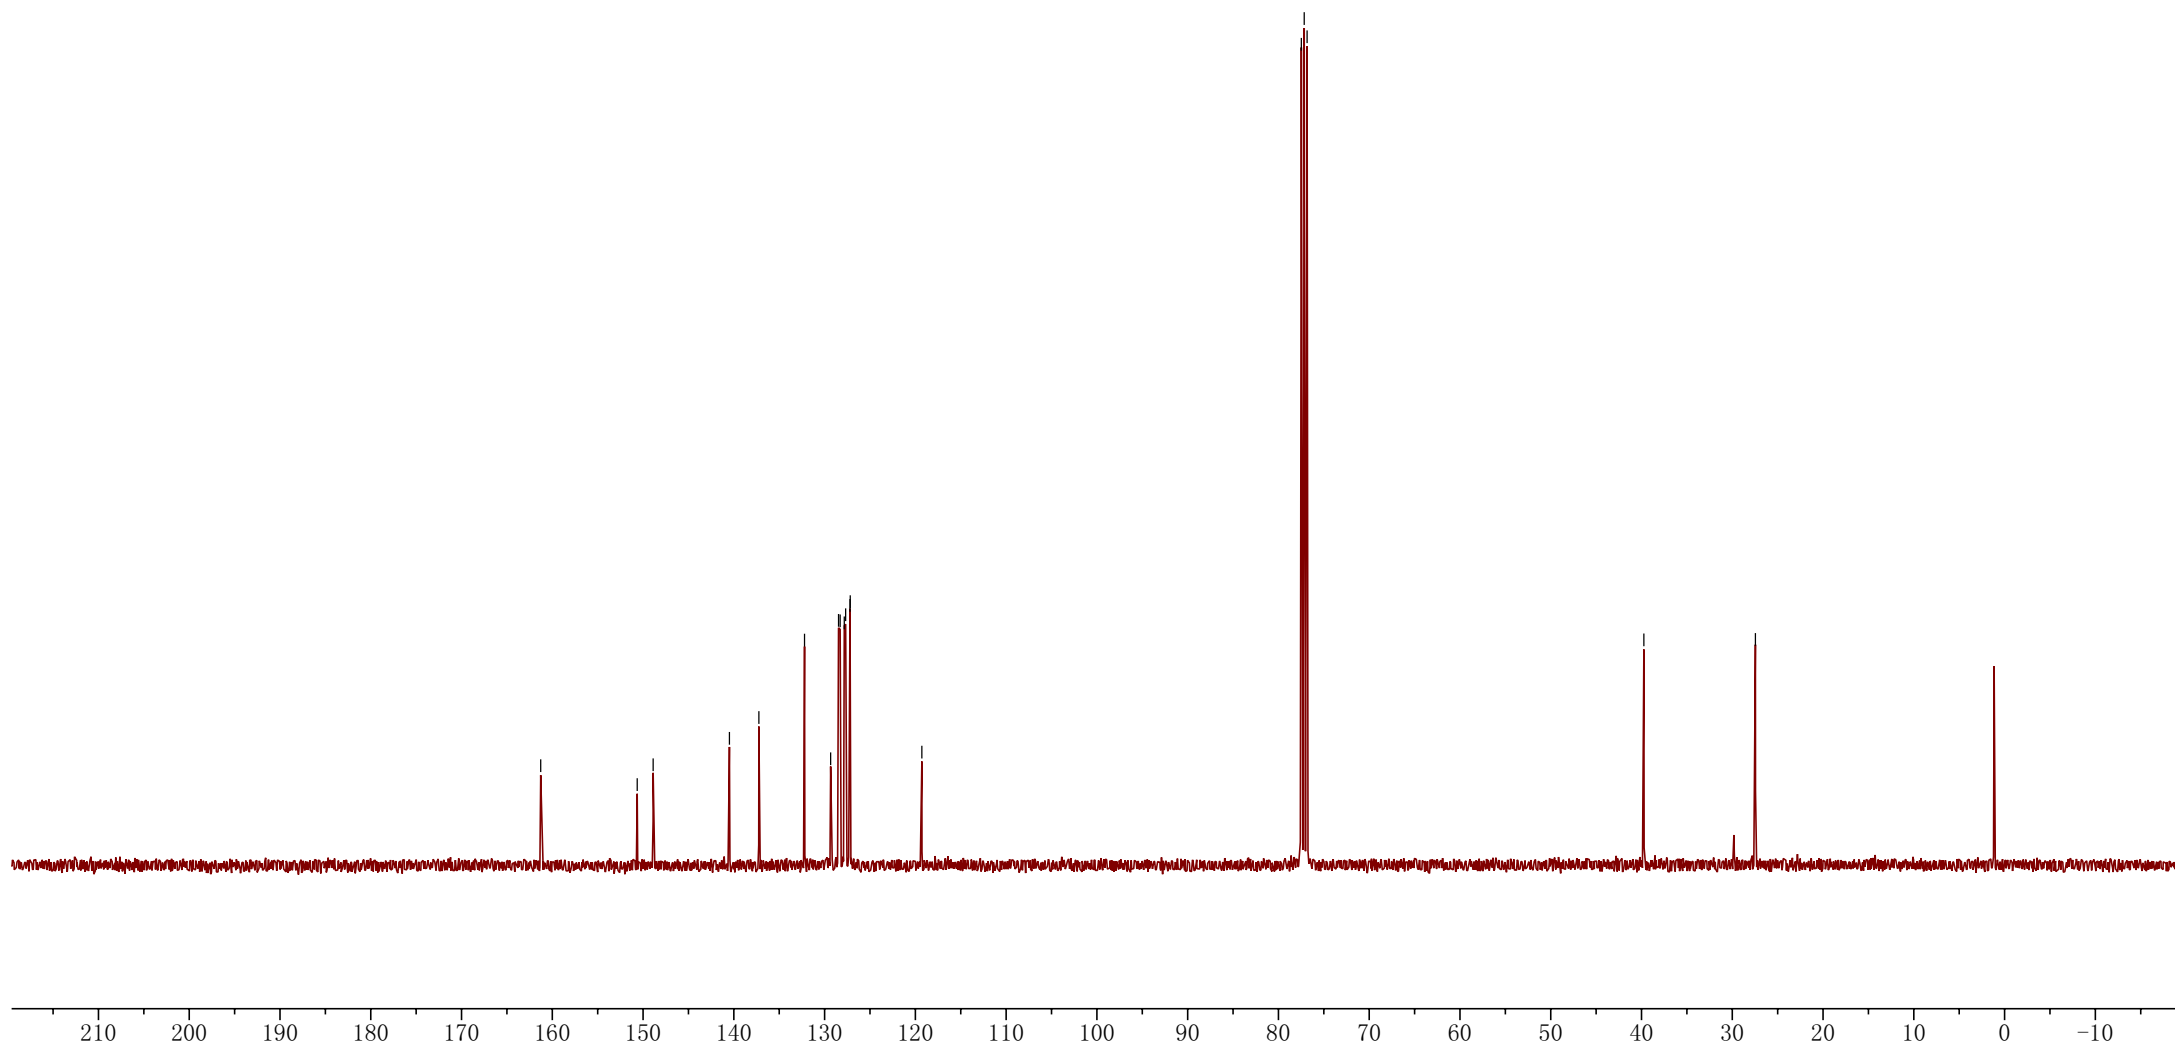

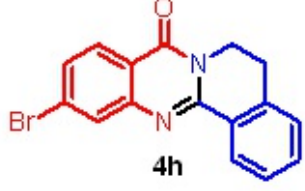

<sup>1</sup>H NMR (400 MHz, CDCl<sub>3</sub>)

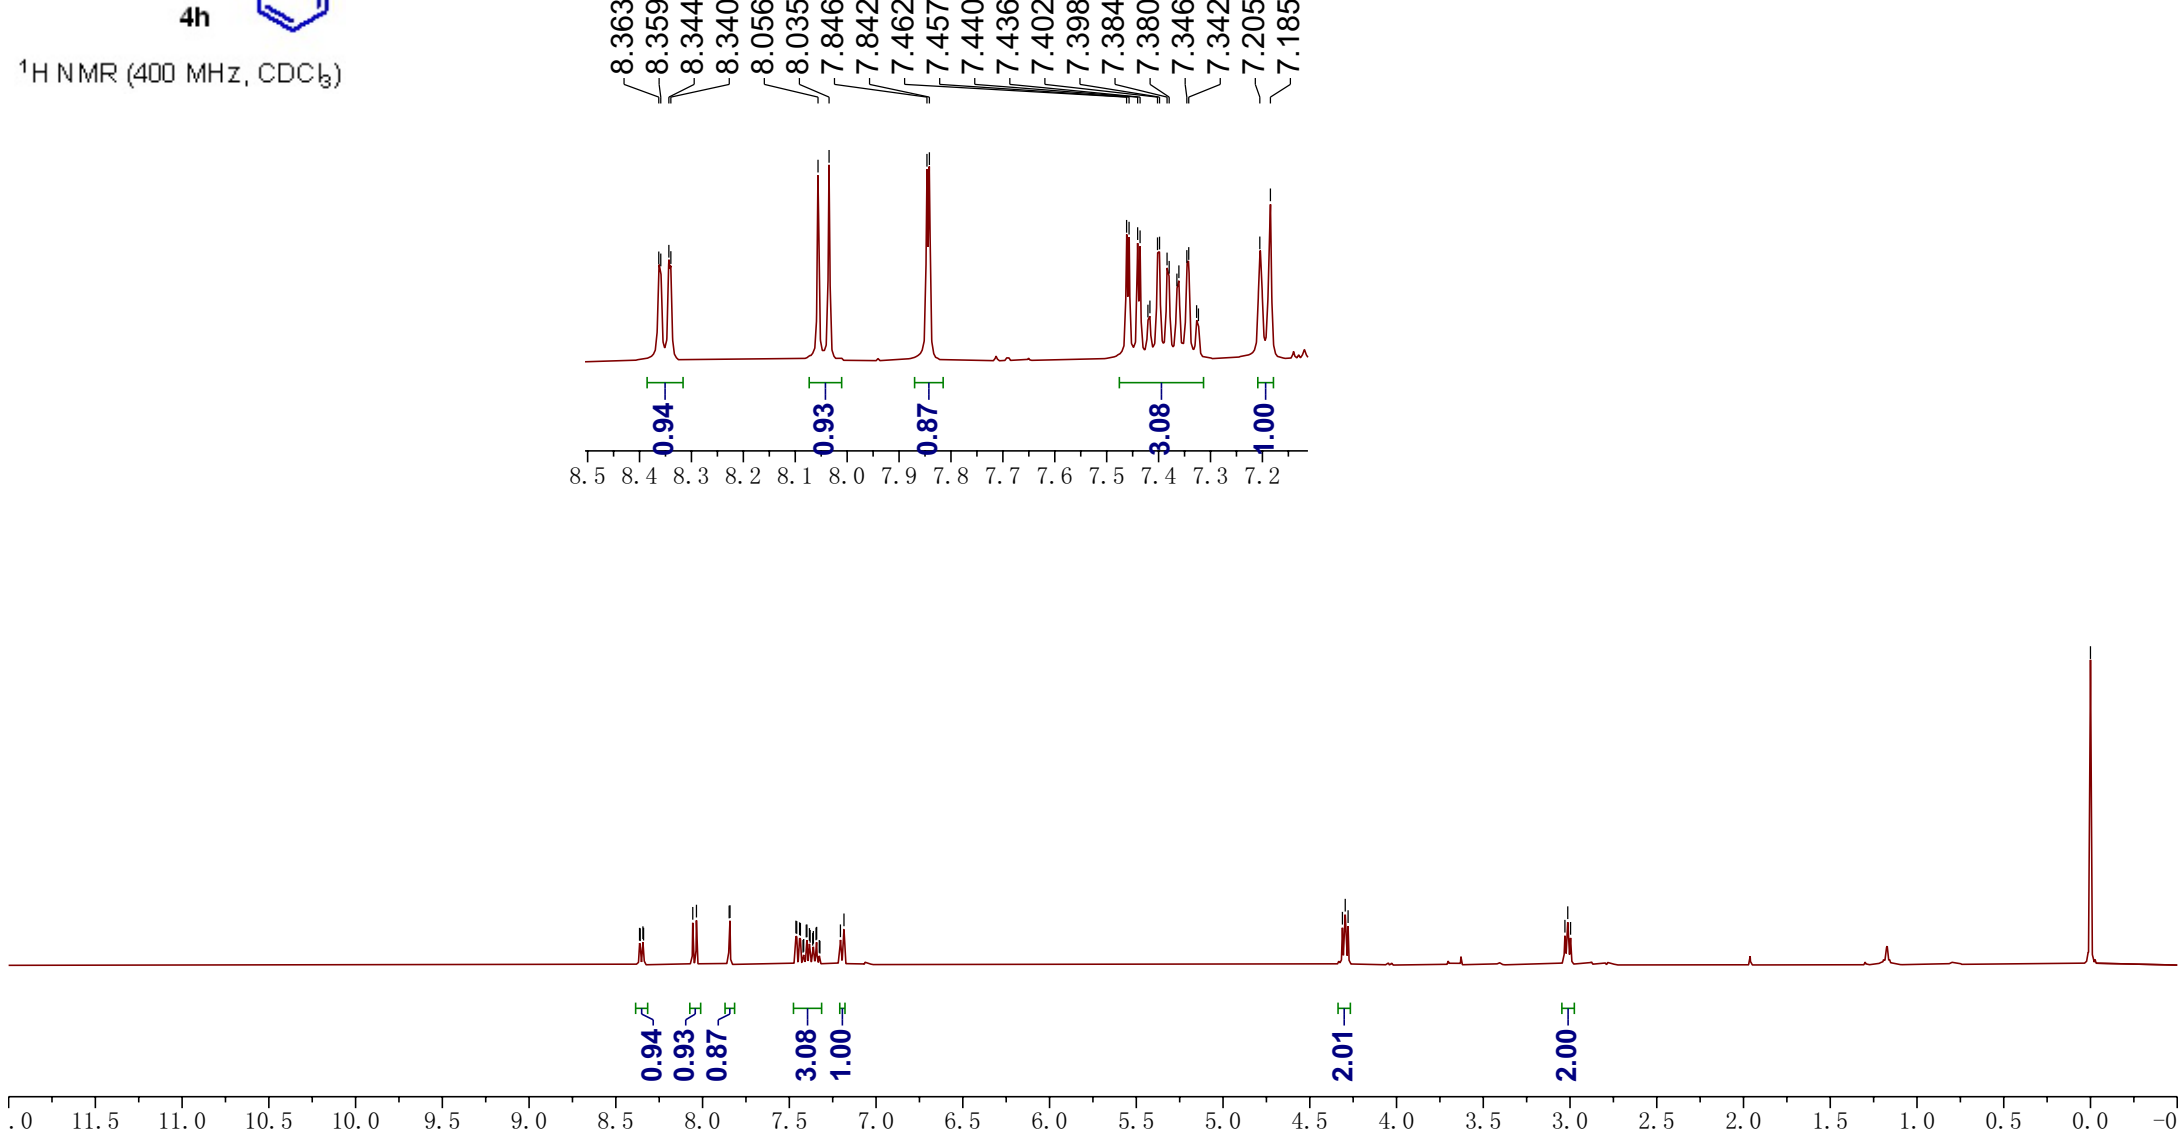

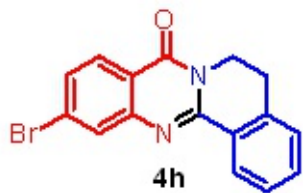

$^{13}\text{C}$  NMR (100 MHz,  $\text{CDCl}_3$ )

— 161.35  
— 150.56  
— 148.91  
— 137.20  
— 132.18  
— 130.34  
— 129.88  
— 129.30  
— 128.96  
— 128.44  
— 128.26  
— 127.79  
— 127.65  
— 119.62

— 77.48  
— 77.16  
— 76.84

— 39.73

— 27.41

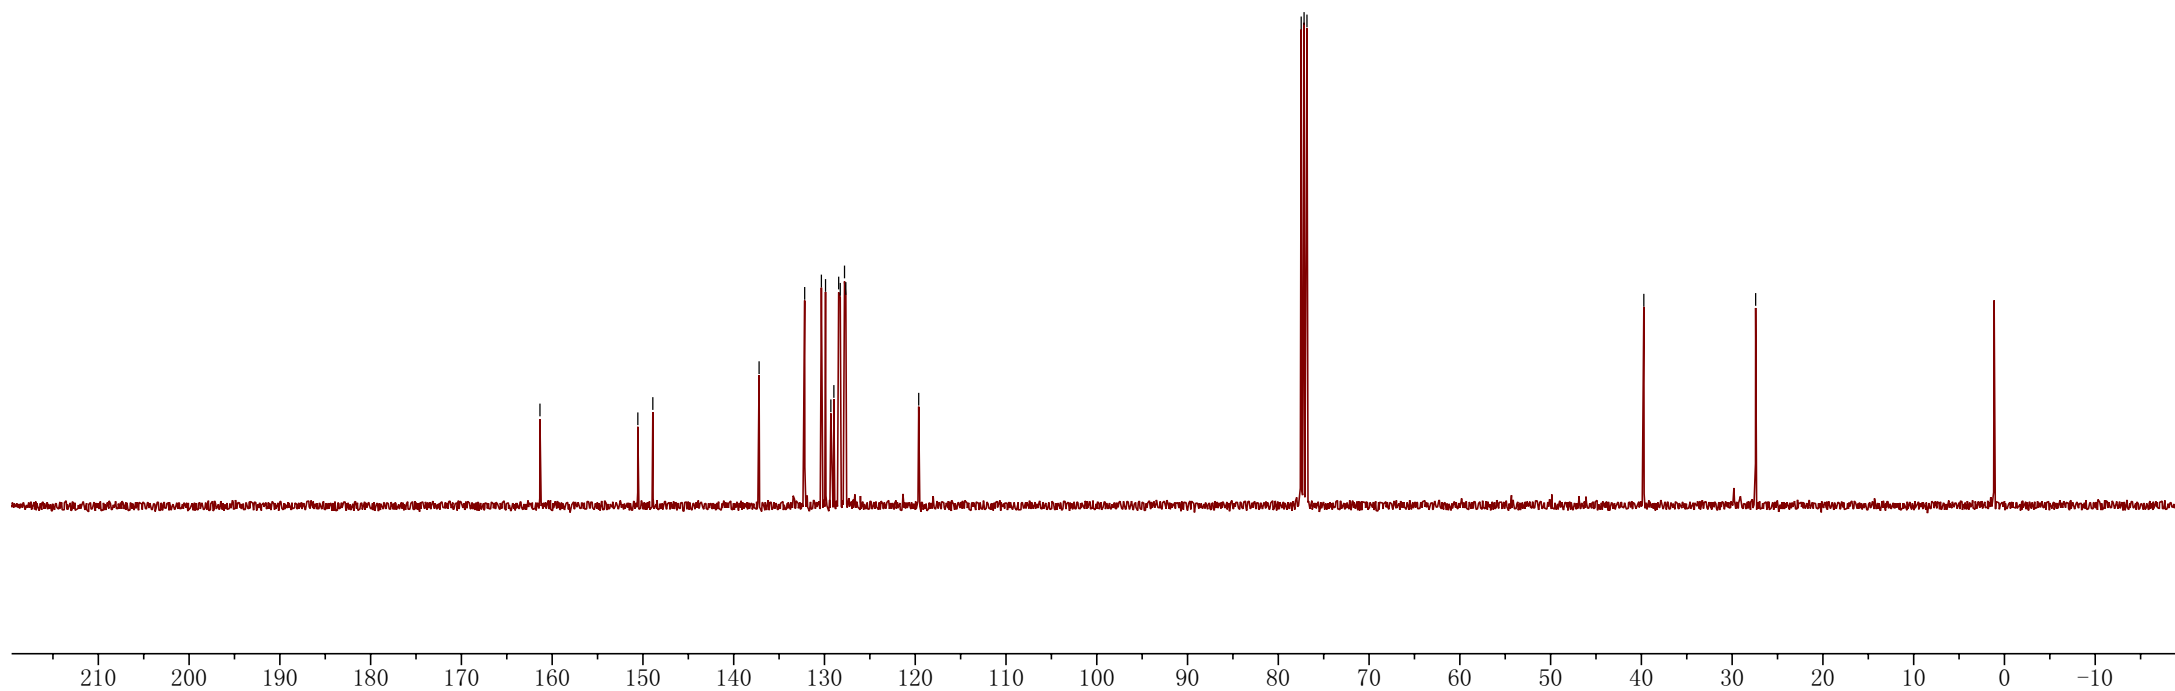



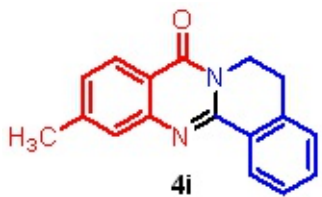

<sup>1</sup>H NMR (400 MHz, CDCl<sub>3</sub>)

8.479  
8.475  
8.460  
8.456  
8.199  
8.179  
7.569  
7.487  
7.483  
7.468  
7.464  
7.451  
7.446  
7.440  
7.425  
7.421  
7.407  
7.403  
7.284  
7.266  
7.260  
4.414  
4.397  
4.381

3.105  
3.089  
3.073

—2.507

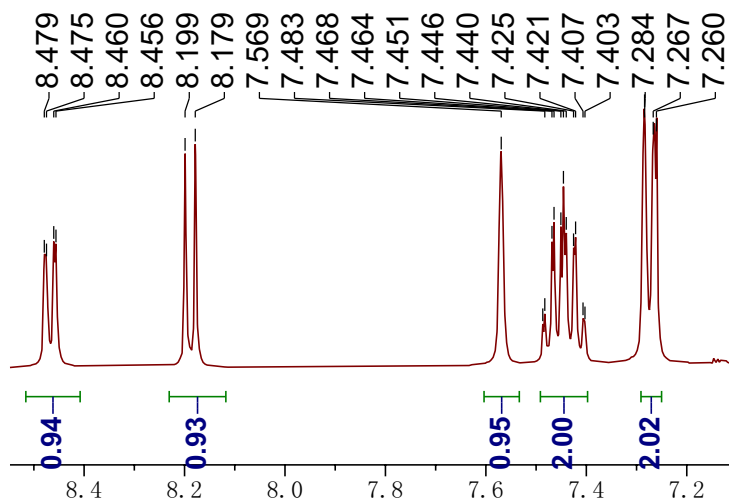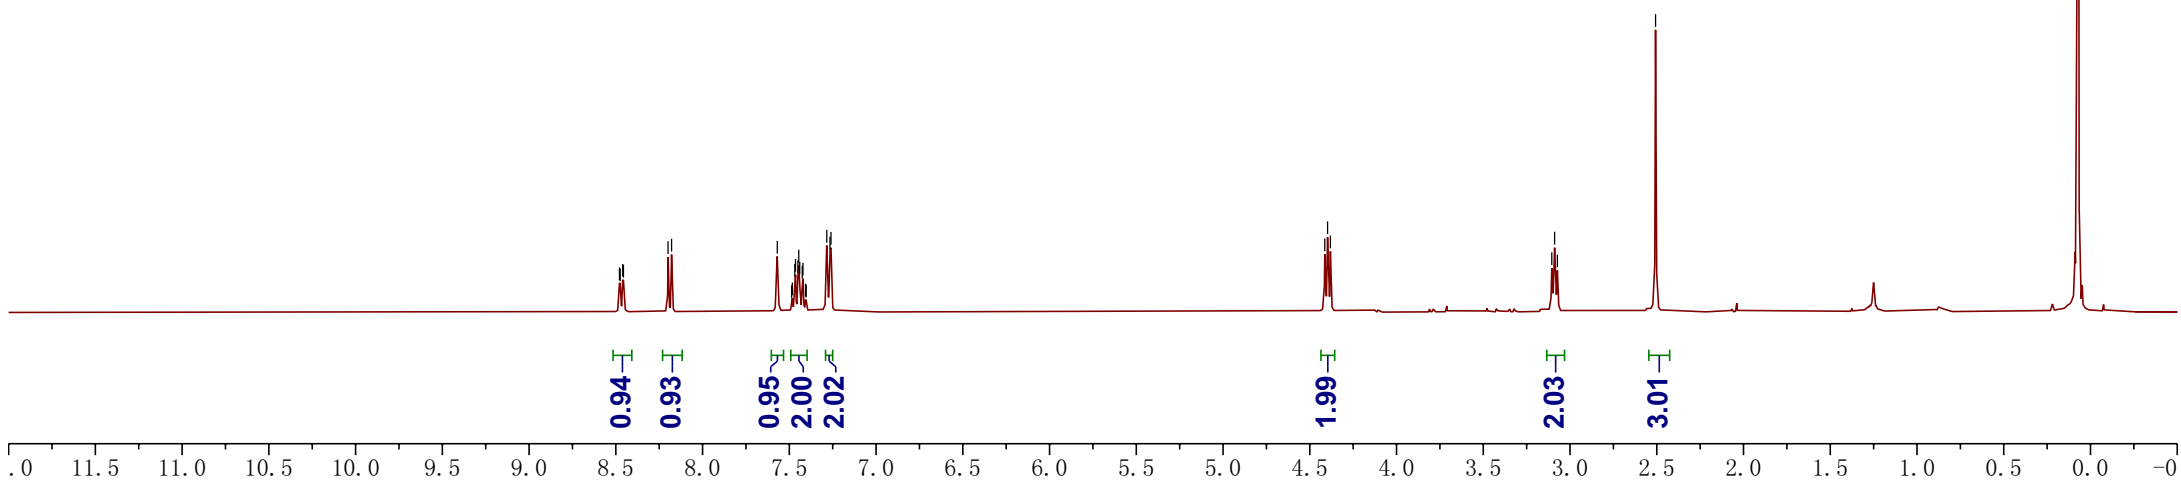

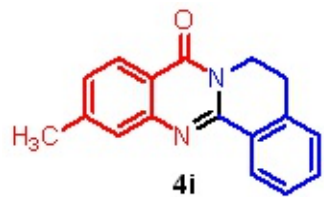

$^{13}\text{C}$  NMR (100 MHz,  $\text{CDCl}_3$ )

— 161.76  
— 149.58  
— 147.99  
— 145.28  
— 137.19  
— 131.76  
— 129.77  
— 128.33  
— 128.11  
— 127.72  
— 127.61  
— 127.41  
— 126.82  
— 118.50

— 77.48  
— 77.16  
— 76.84

— 39.63

— 27.63  
— 22.03

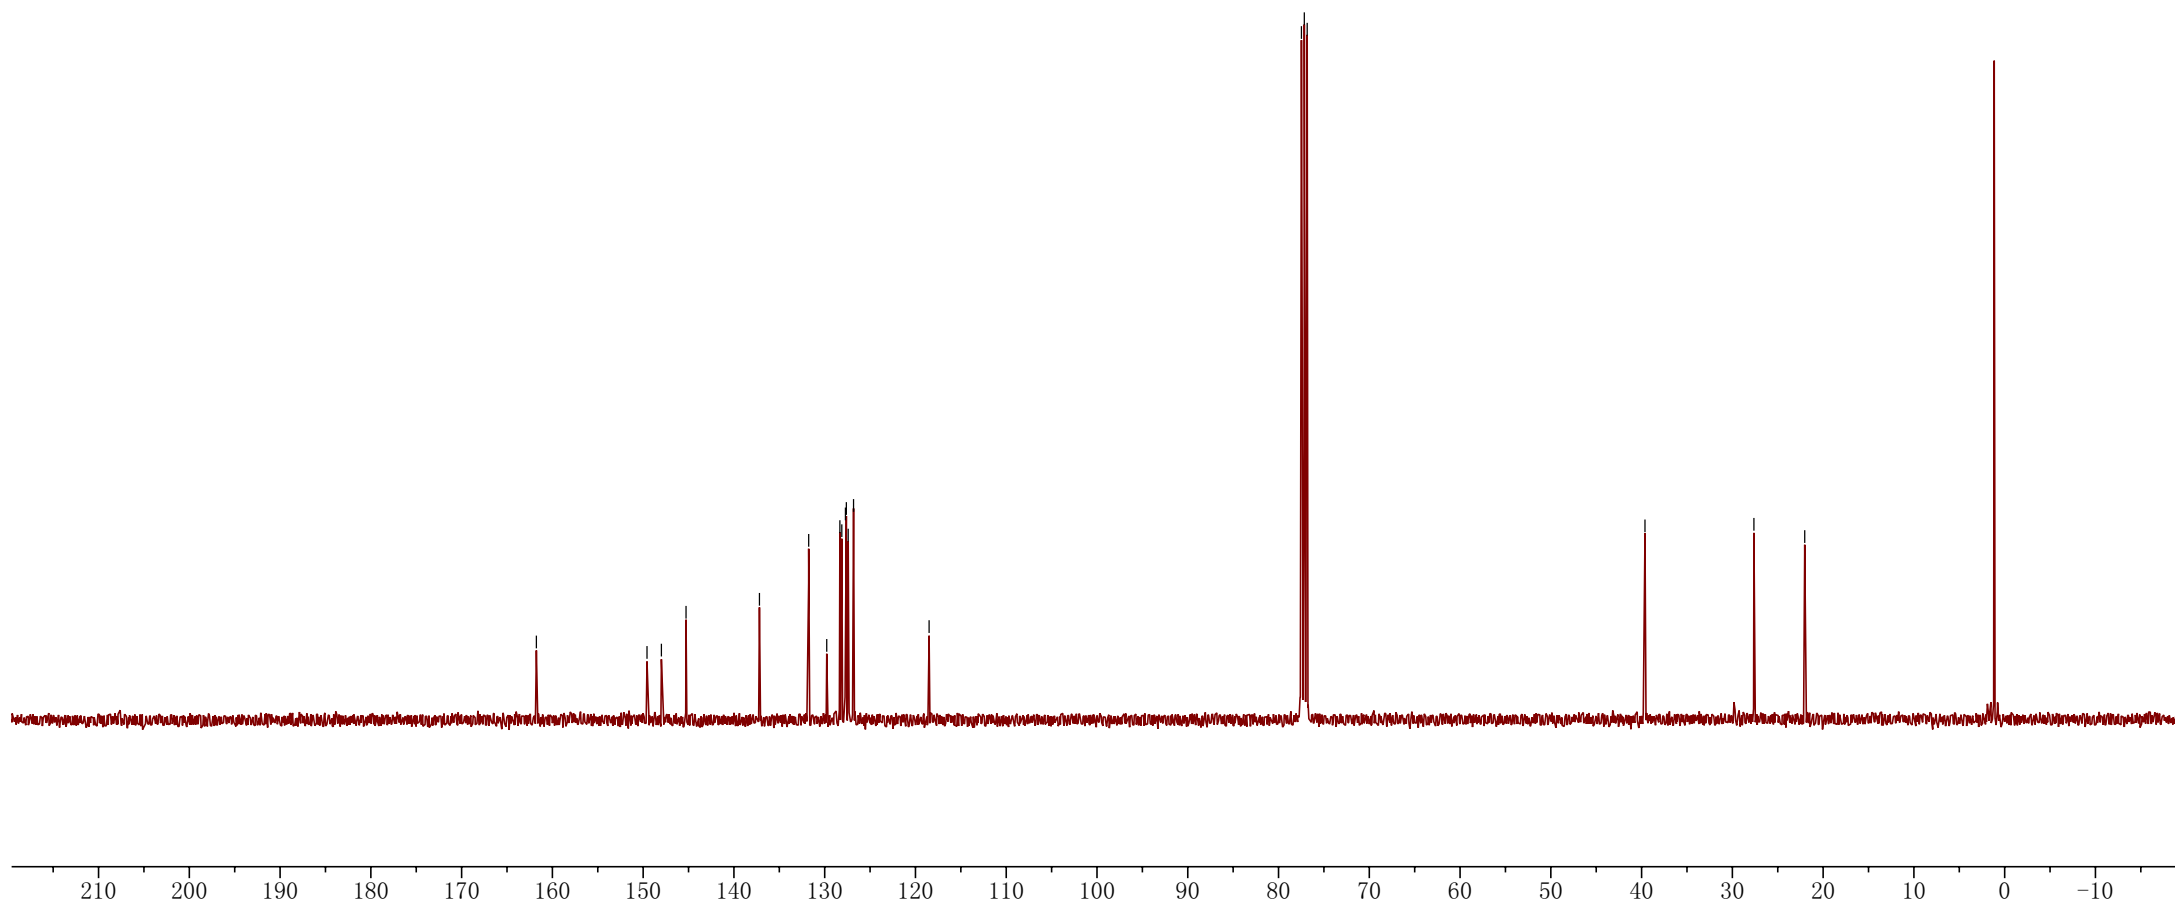

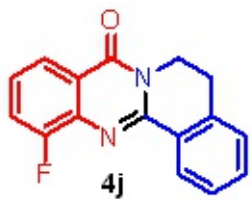

<sup>1</sup>H NMR (400 MHz, CDCl<sub>3</sub>)

8.557  
8.554  
8.538  
8.534  
8.102  
8.098  
8.096  
8.082  
8.079  
8.076  
7.513  
7.509  
7.495  
7.491  
7.477  
7.473  
7.468  
7.465  
7.461  
7.452  
7.448  
7.445  
7.442  
7.442  
7.413  
7.401  
7.393  
7.381  
7.373  
7.361  
7.260  
4.438  
4.422  
4.406  
3.134  
3.118  
3.101

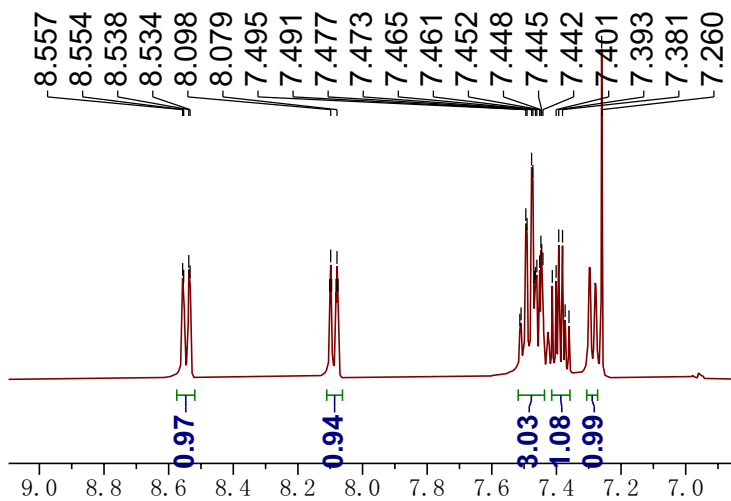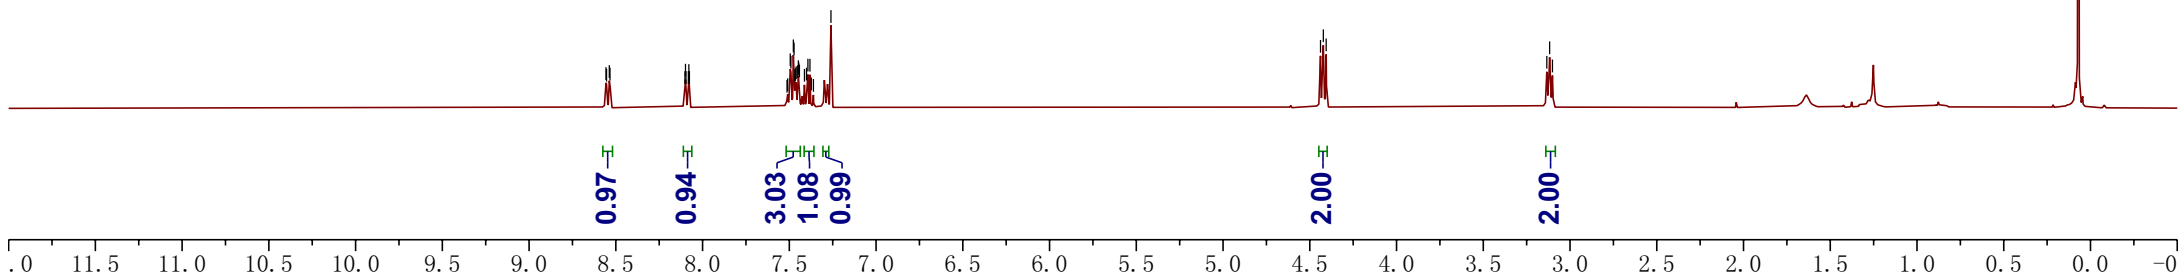

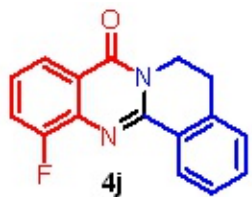

$^{13}\text{C}$  NMR (100 MHz,  $\text{CDCl}_3$ )

161.05  
161.02  
158.71  
156.16  
150.02  
137.70  
137.58  
137.12  
132.22  
129.46  
128.60  
127.93  
127.61  
126.58  
126.50  
122.79  
122.78  
122.54  
122.50  
119.78  
119.59  
77.48  
77.16  
76.84  
-39.91  
-27.48

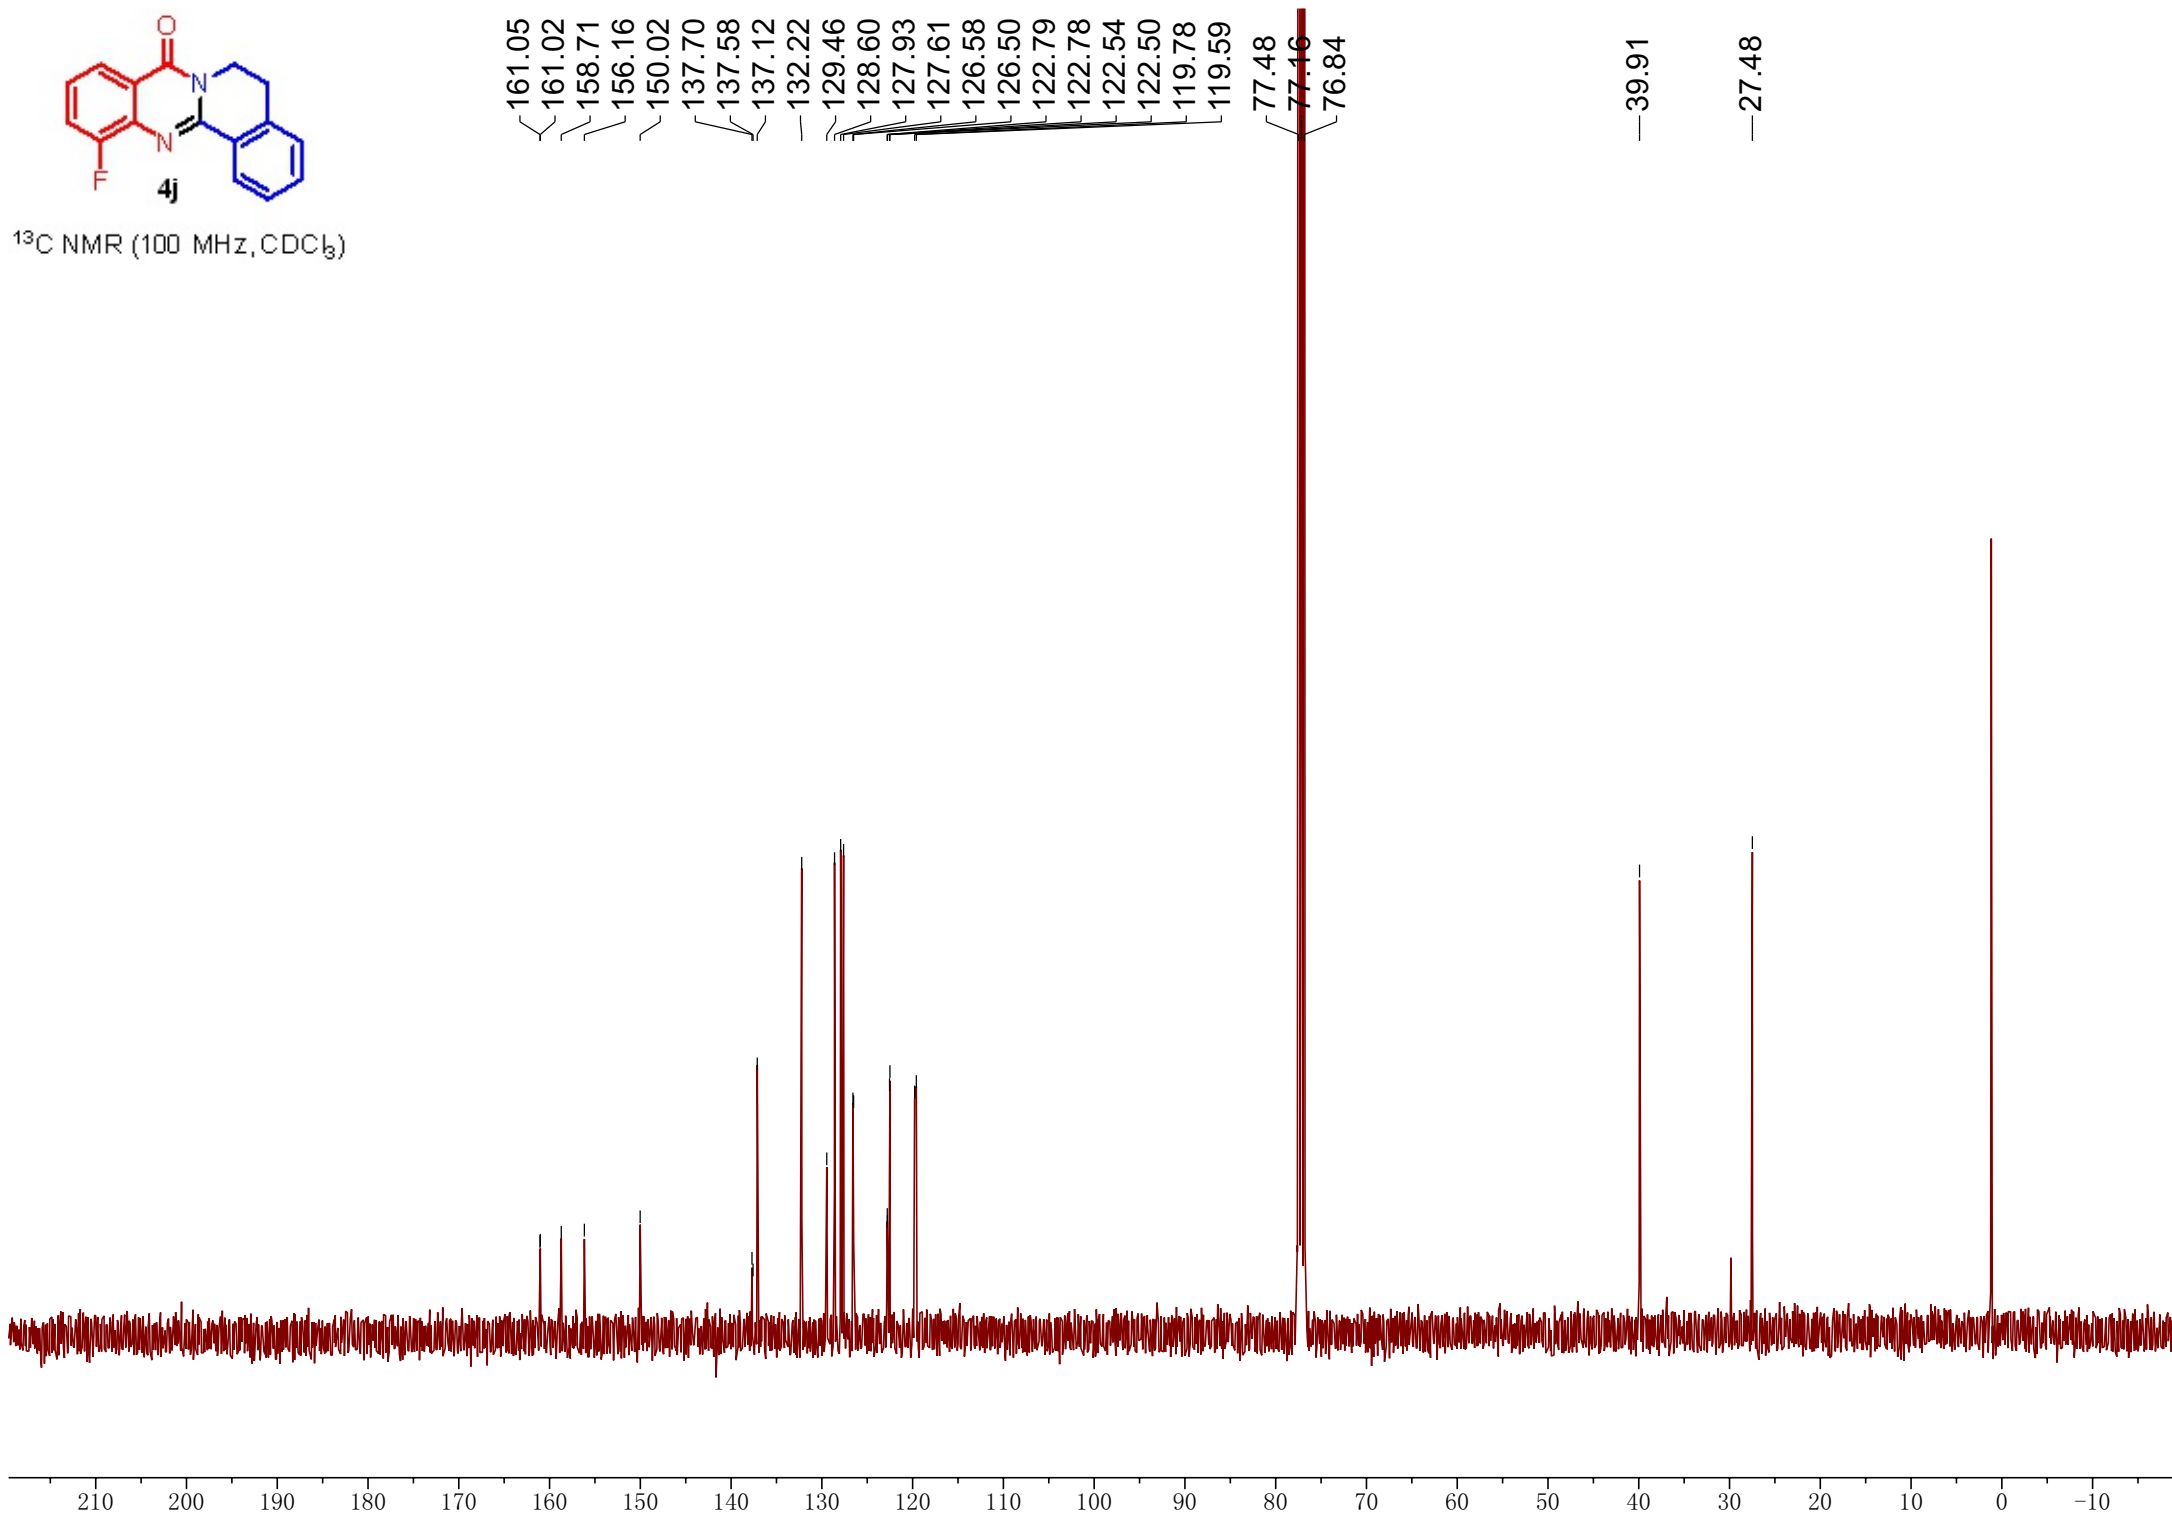

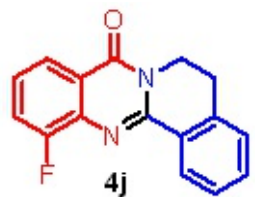

$^{19}\text{F}$  NMR (376 MHz,  $\text{CDCl}_3$ )

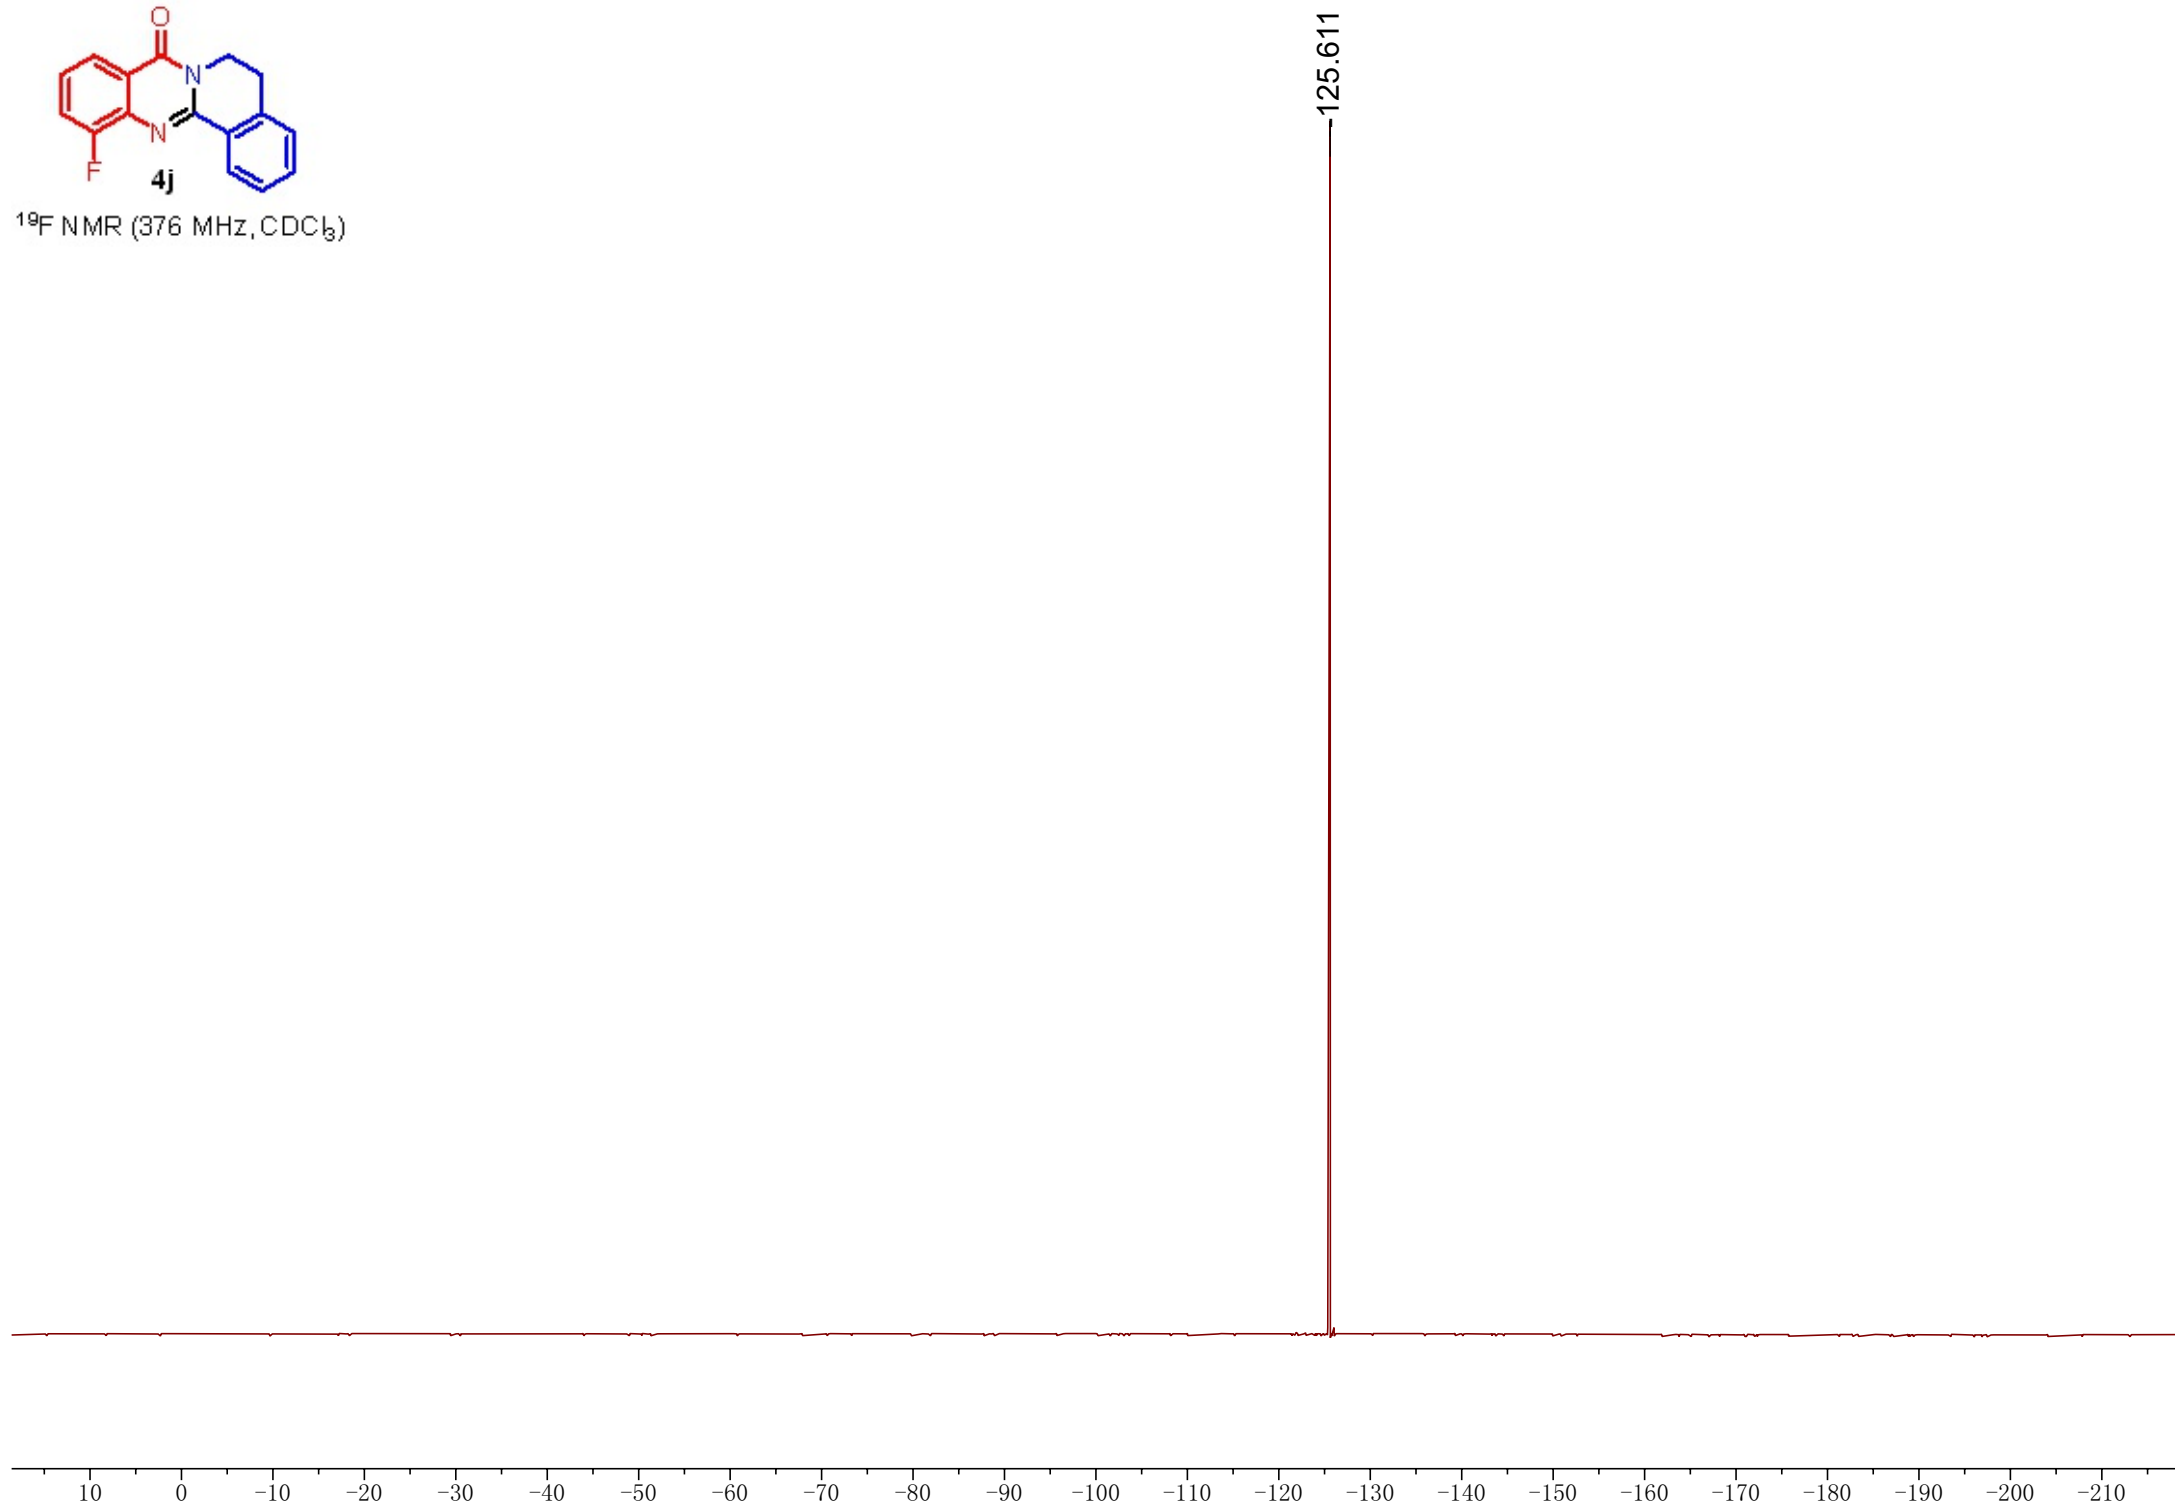

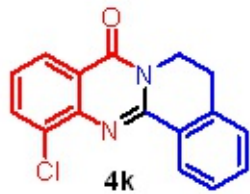

<sup>1</sup>H NMR (400 MHz, CDCl<sub>3</sub>)

8.448  
8.433  
8.253  
8.247  
7.703  
7.681  
7.670  
7.665  
7.649  
7.643  
7.499  
7.496  
7.481  
7.477  
7.463  
7.459  
7.446  
7.442  
7.426  
7.423  
7.408  
7.404  
7.286  
7.268  
7.260  
4.409  
4.392  
4.376  
3.112  
3.096  
3.079

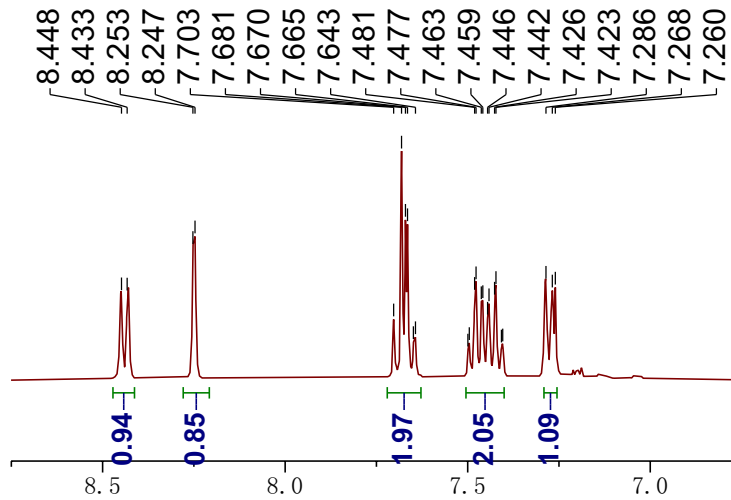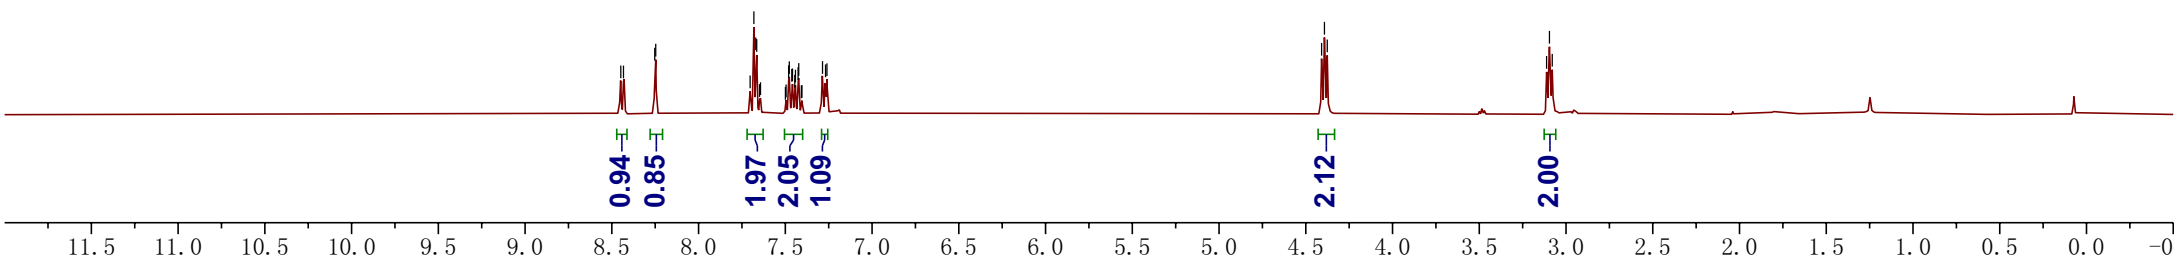

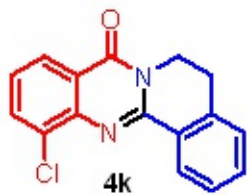

<sup>13</sup>C NMR (100 MHz, CDCl<sub>3</sub>)

— 160.85  
— 149.74  
— 146.45  
137.14  
134.79  
132.32  
132.07  
129.38  
128.17  
127.82  
127.69  
126.33  
121.83

77.48  
77.16  
76.84

— 39.89

— 27.47

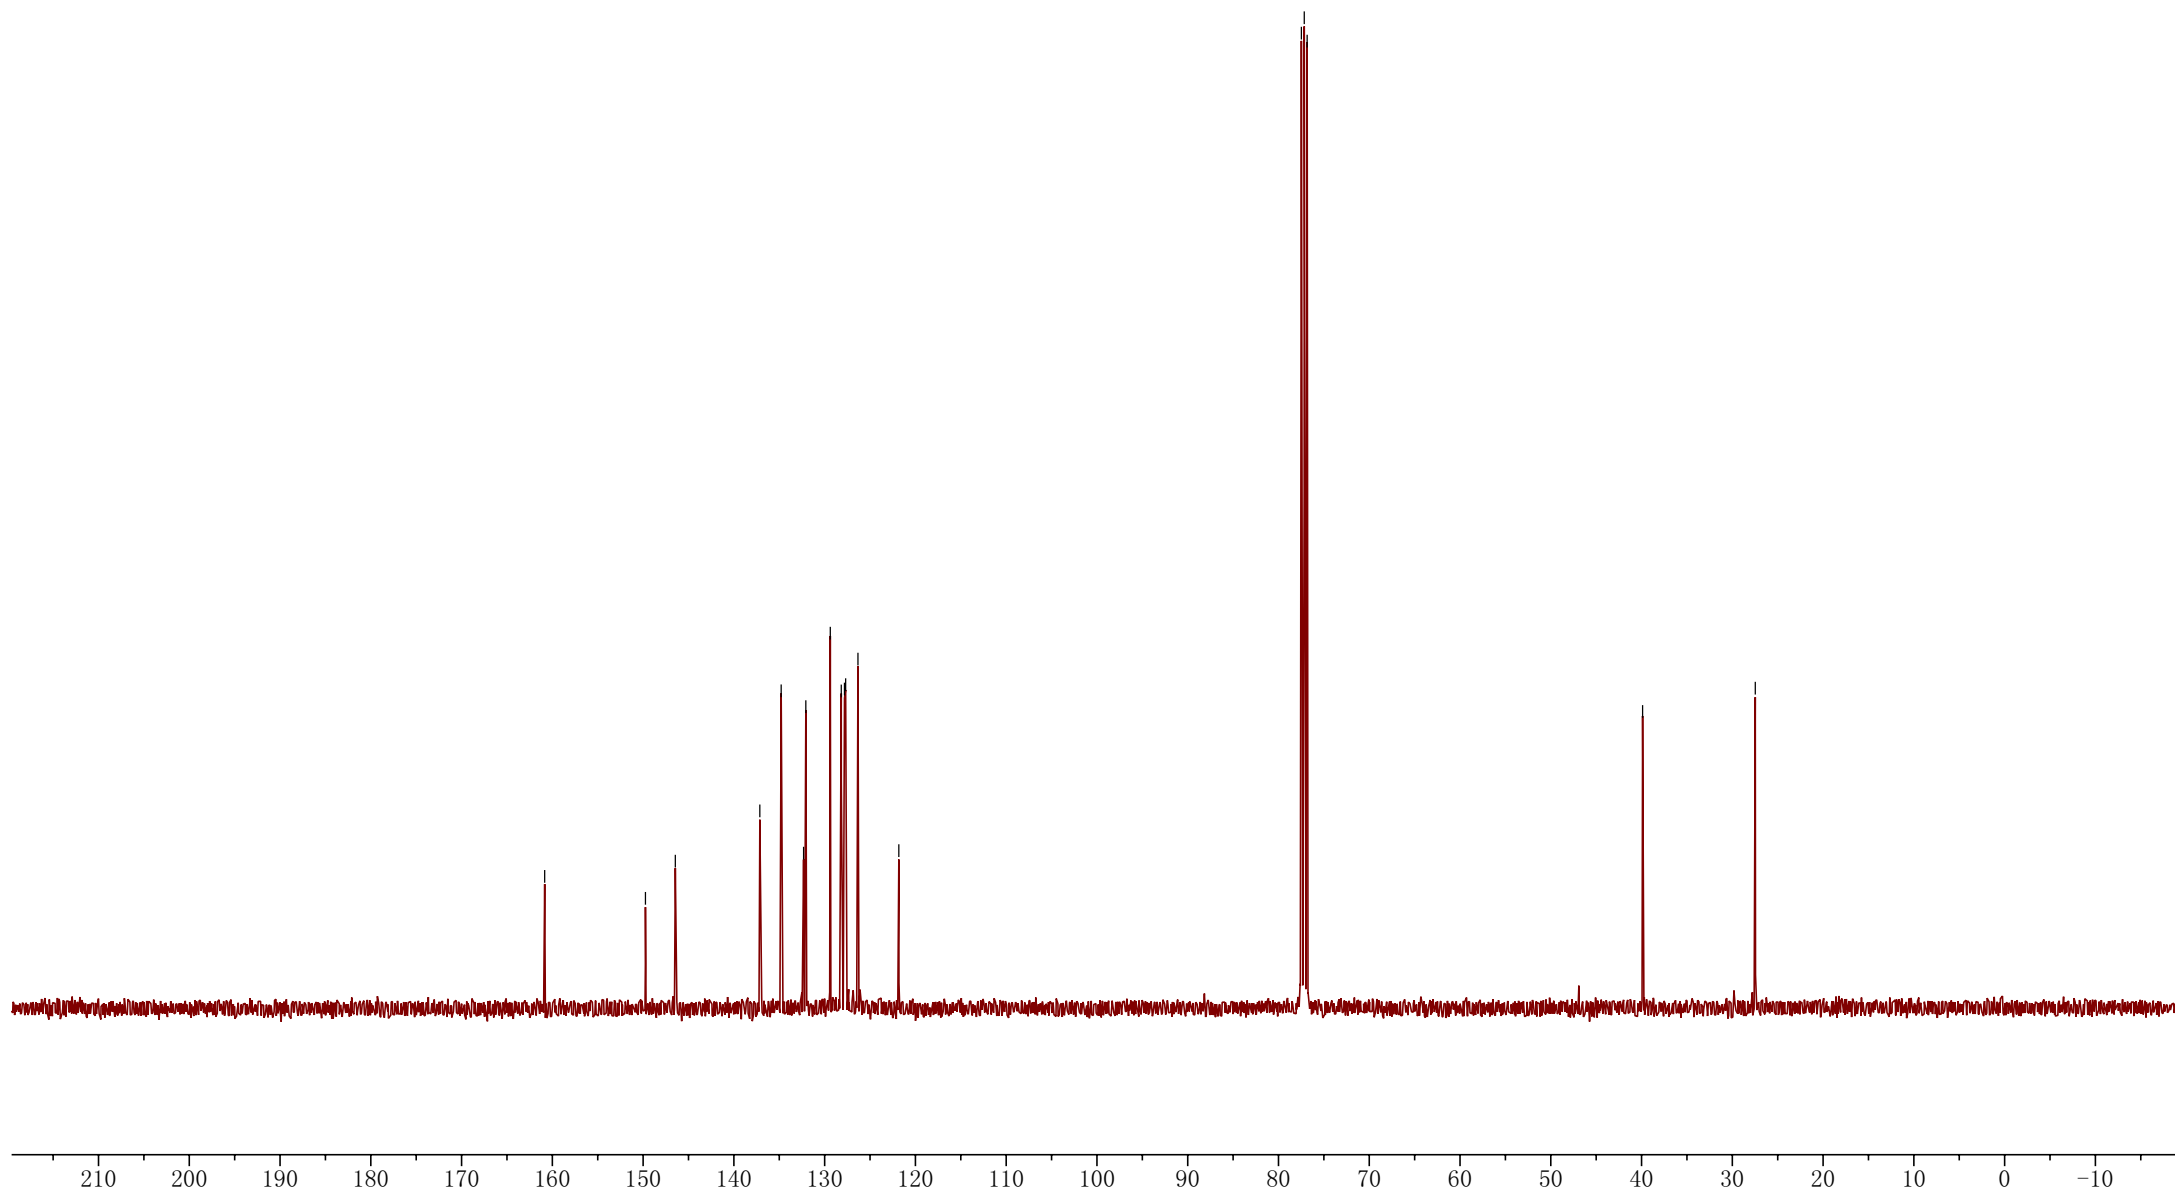

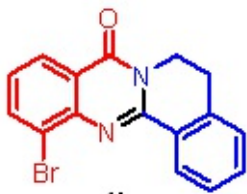

4I

$^1\text{H}$  NMR (400 MHz,  $\text{CDCl}_3$ )

8.343  
8.339  
8.323  
8.319  
8.303  
8.297  
7.705  
7.700  
7.684  
7.678  
7.515  
7.493  
7.399  
7.395  
7.380  
7.381  
7.377  
7.362  
7.358  
7.342  
7.338  
7.322  
7.319  
7.303  
7.300  
7.182  
7.164  
4.303  
4.287  
4.270  
3.010  
2.994  
2.978

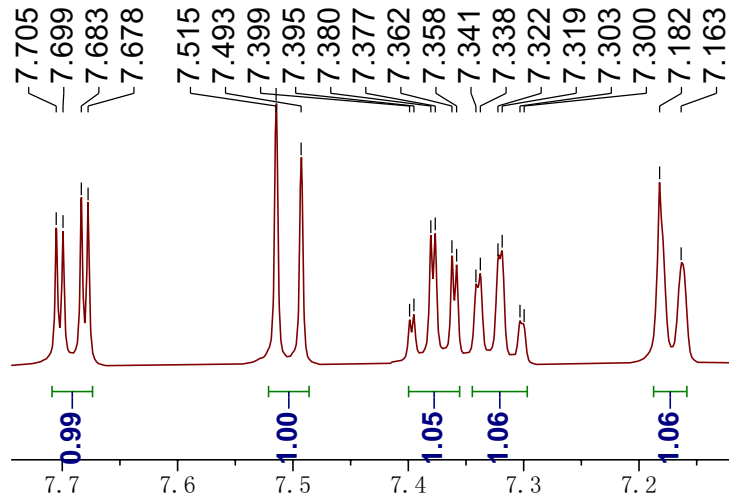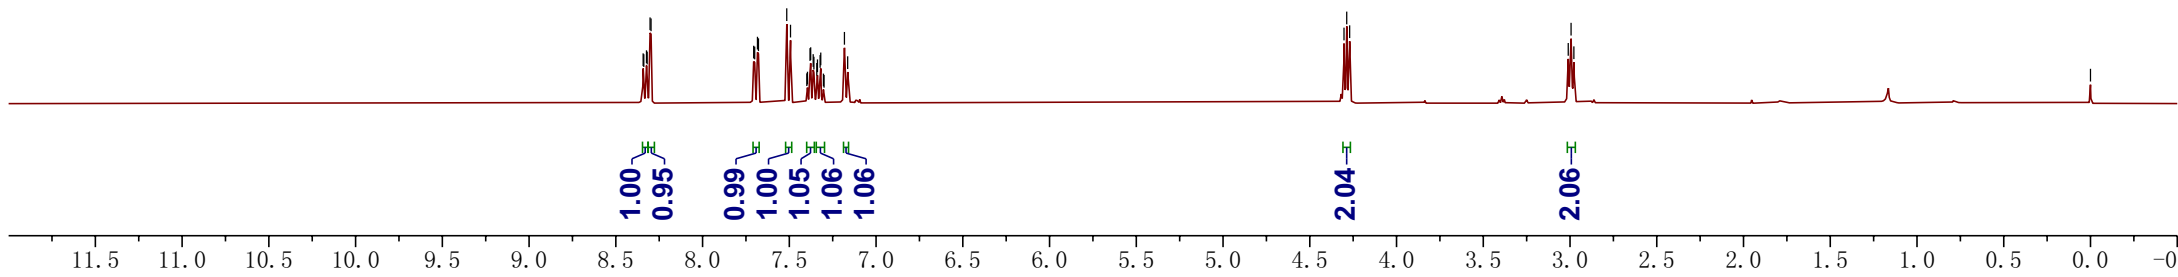



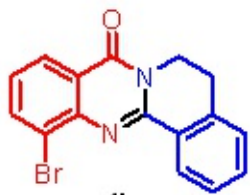

**4I**

$^{13}\text{C}$  NMR (100 MHz,  $\text{CDCl}_3$ )

— 160.59  
— 149.80  
— 146.69  
137.43  
137.09  
132.04  
129.46  
129.45  
129.30  
128.12  
127.75  
127.63  
122.11  
119.98

77.48  
77.16  
76.84

— 39.82

— 27.39

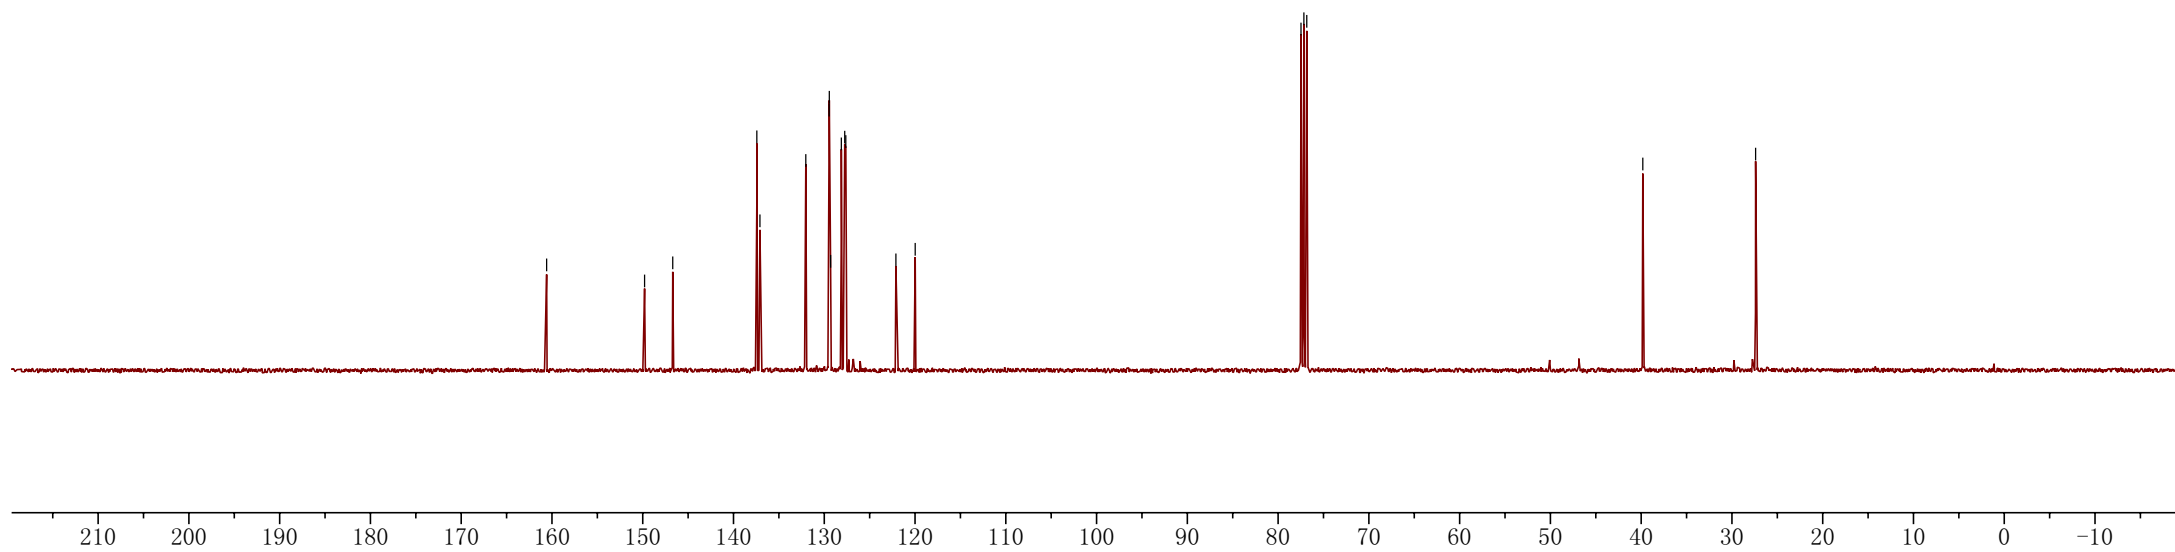

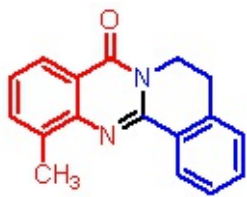

4m

<sup>1</sup>H NMR (400 MHz, CDCl<sub>3</sub>)

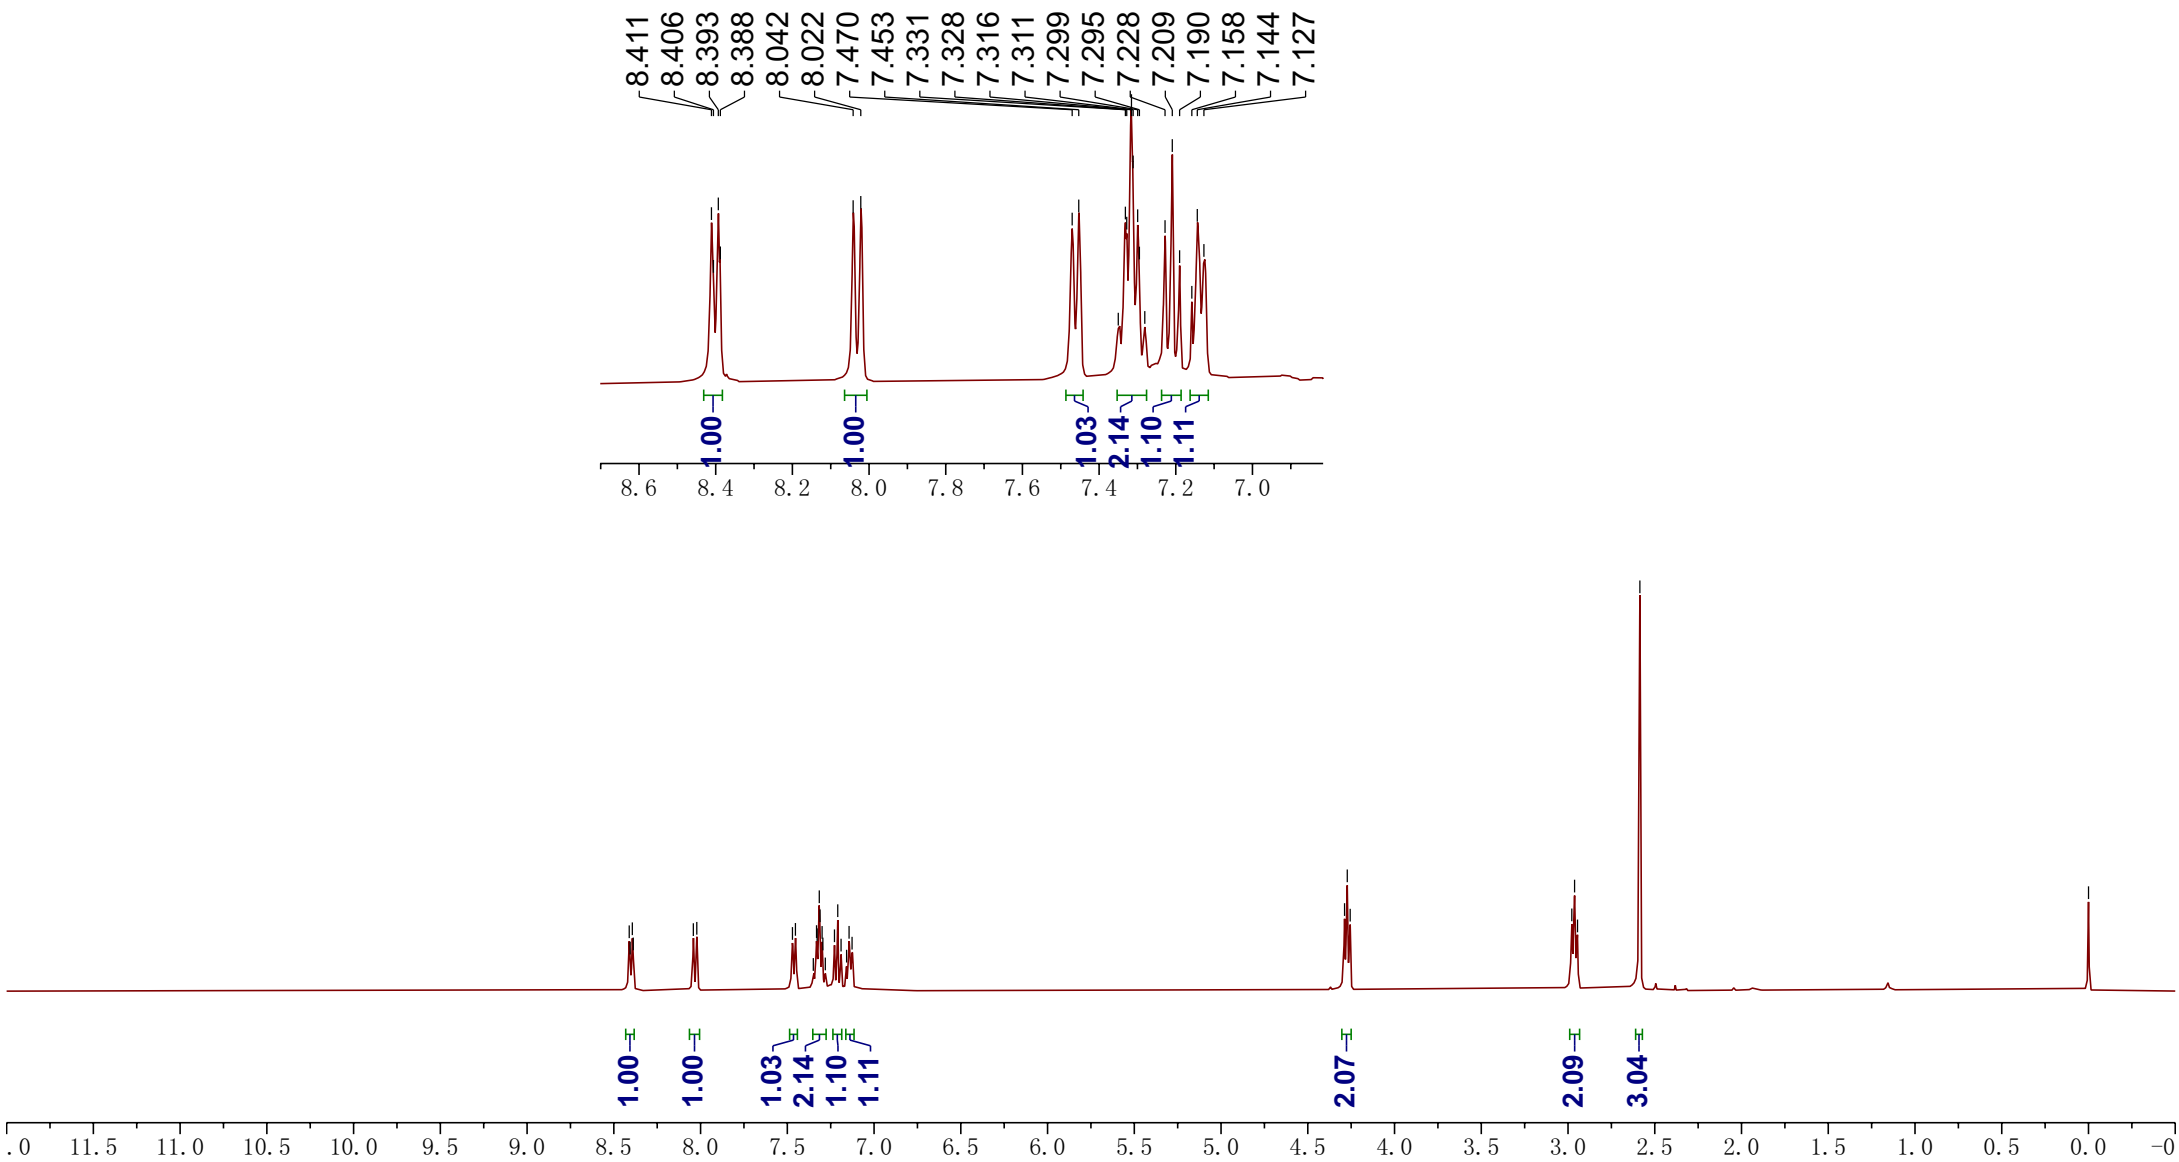

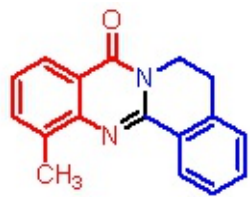

4m

$^{13}\text{C}$  NMR (100 MHz,  $\text{CDCl}_3$ )

—162.07

—148.01

—146.29

—136.97

—136.13

—134.73

—131.55

—129.97

—128.07

—127.56

—127.50

—126.14

—124.56

—120.71

—77.48

—77.16

—76.84

—39.55

—27.46

—17.35

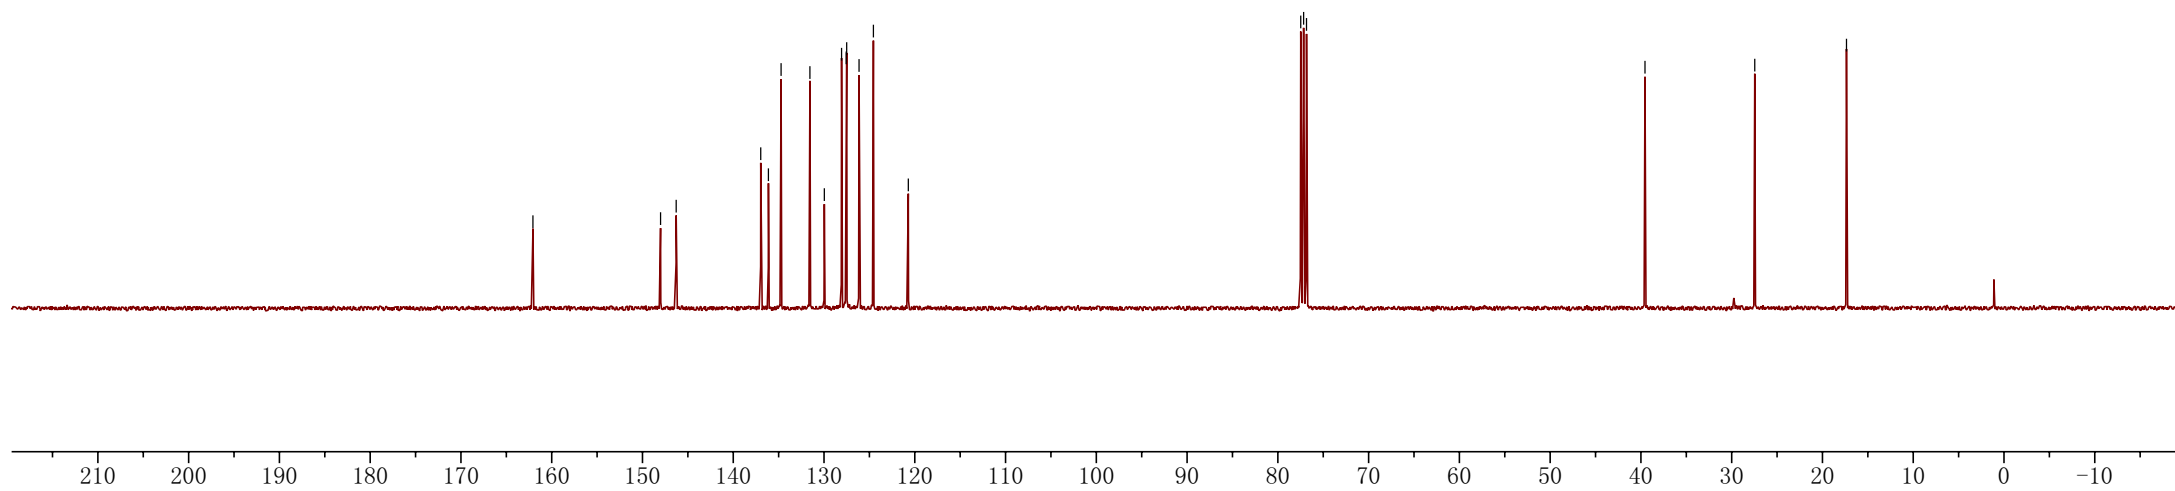

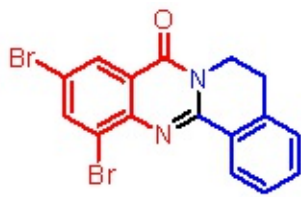

4n

$^1\text{H NMR}$  (400 MHz,  $\text{CDCl}_3$ )

8.596  
8.592  
8.577  
8.573  
8.396  
8.391  
8.135  
8.130  
7.535  
7.531  
7.516  
7.512  
7.498  
7.494  
7.486  
7.482  
7.467  
7.463  
7.448  
7.444  
7.301  
7.281  
7.260  
4.415  
4.399  
4.383

3.132  
3.116  
3.100

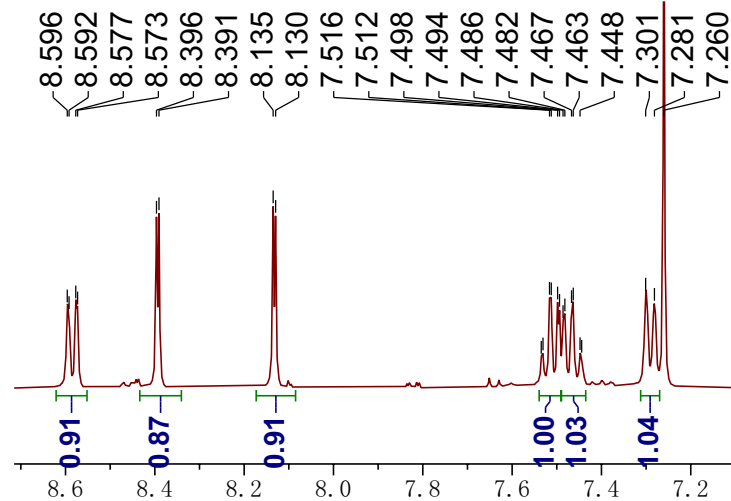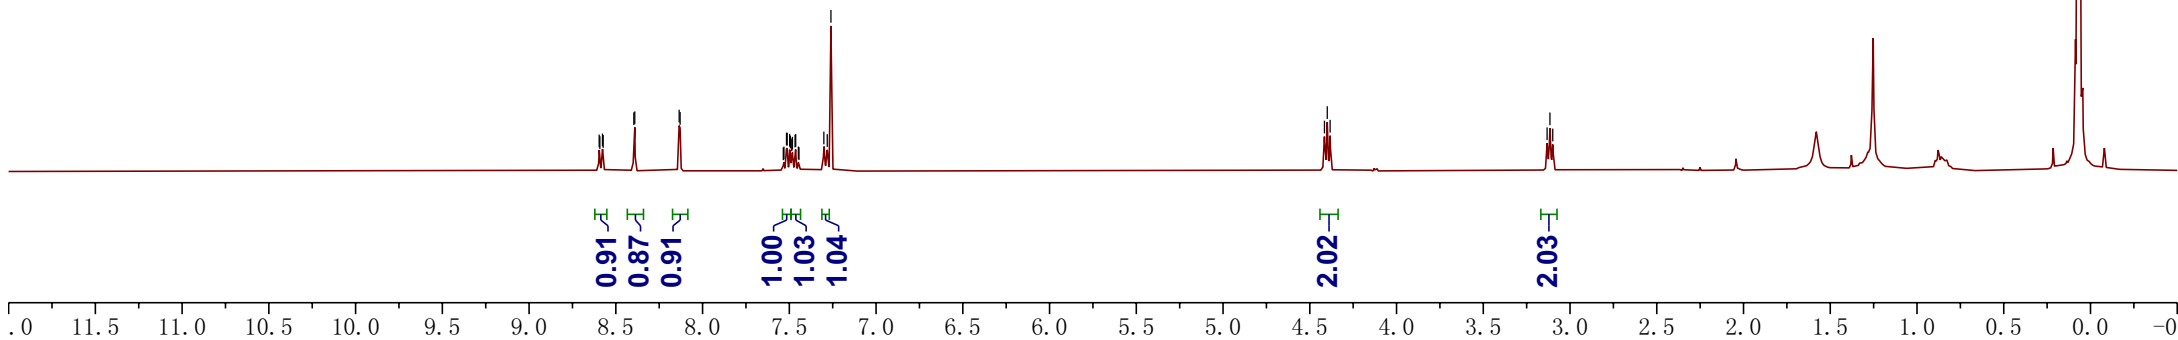

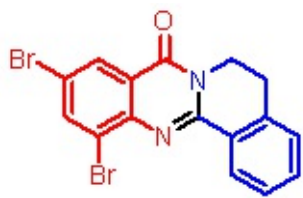

**4n**

$^{13}\text{C}$  NMR (100 MHz,  $\text{CDCl}_3$ )

160.34  
150.47  
144.67  
140.36  
137.10  
132.58  
129.58  
129.20  
128.84  
128.07  
127.69  
124.05  
122.97  
119.57

77.48  
77.16  
76.84

40.11

27.31

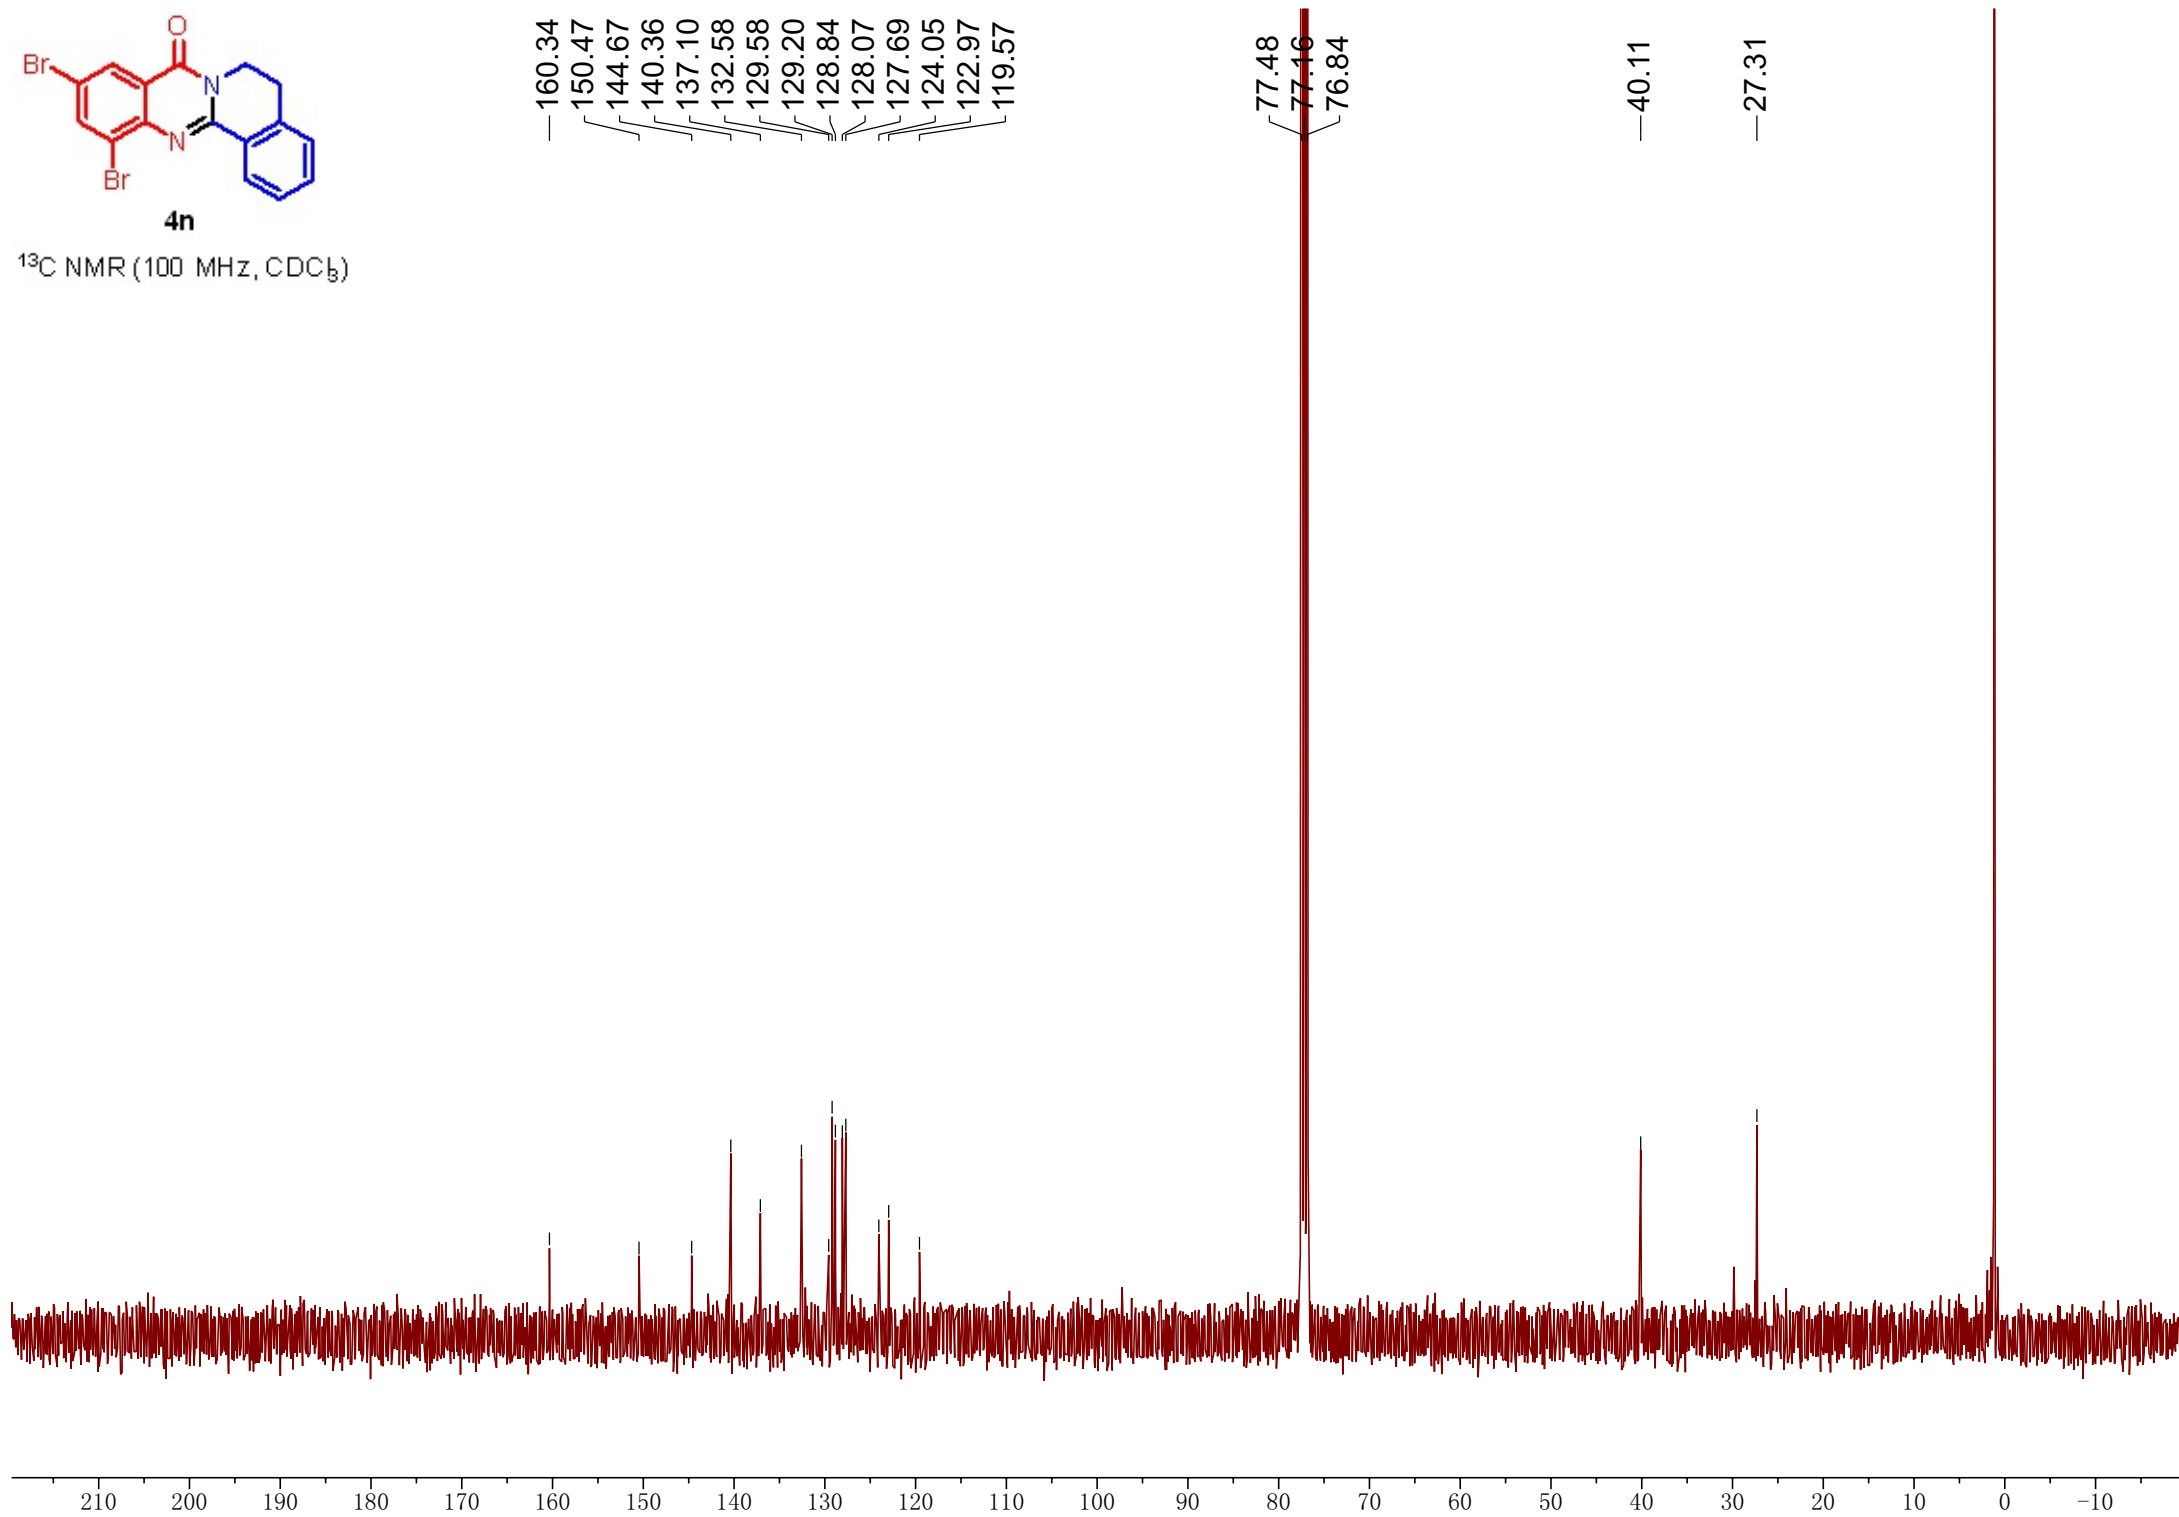

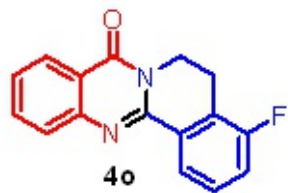

<sup>1</sup>H NMR (400 MHz, CDCl<sub>3</sub>)

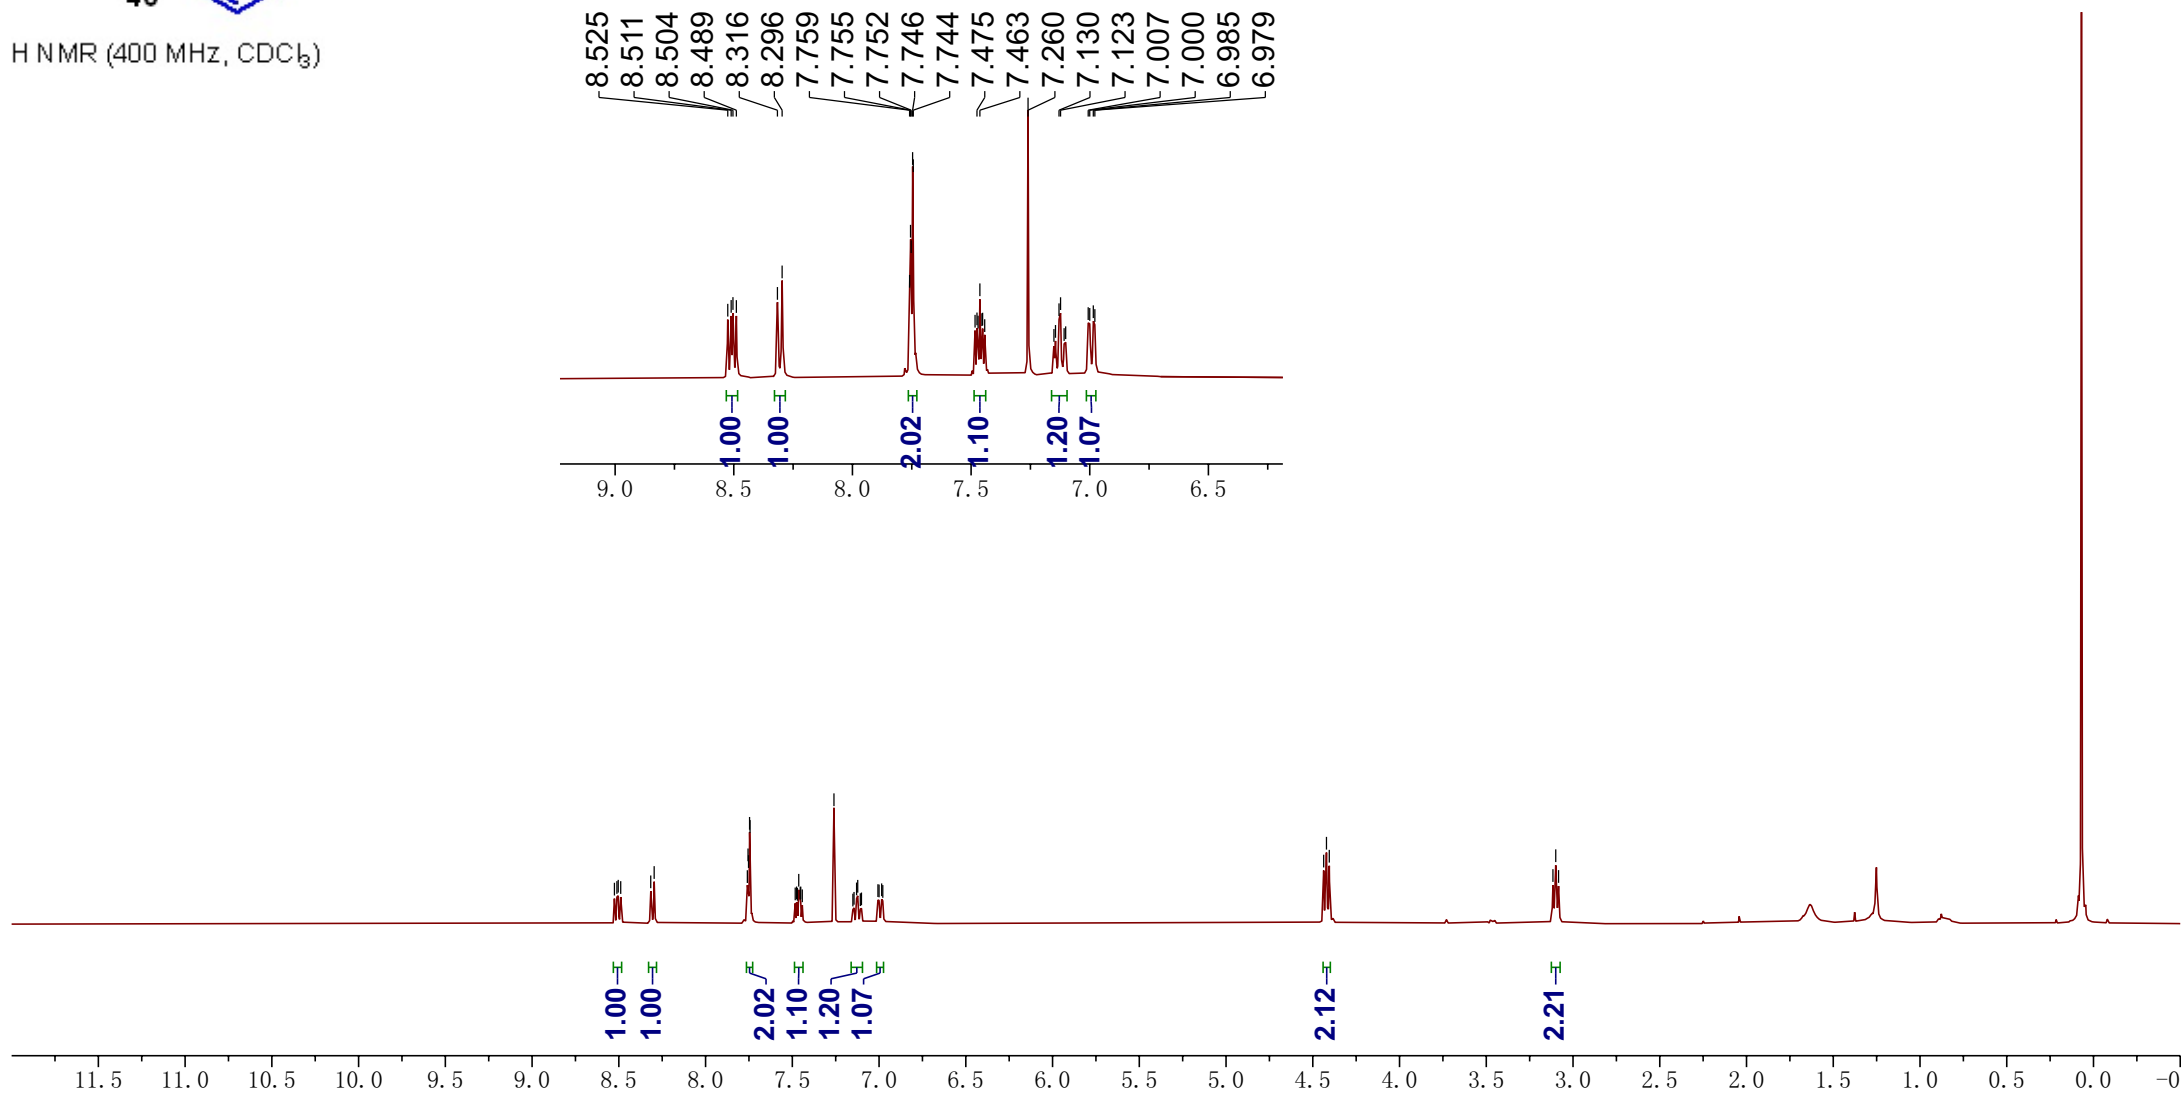

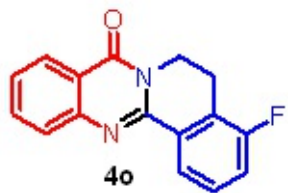

$^{13}\text{C}$  NMR (100 MHz,  $\text{CDCl}_3$ )

166.17  
163.65  
161.77

148.77  
147.85  
139.89  
139.80  
134.48  
130.98  
130.88  
127.67  
127.06  
126.73  
126.04  
125.99  
125.96  
125.92  
120.77  
115.37  
115.16  
114.54  
114.32

77.48  
77.16  
76.84

39.56

27.65

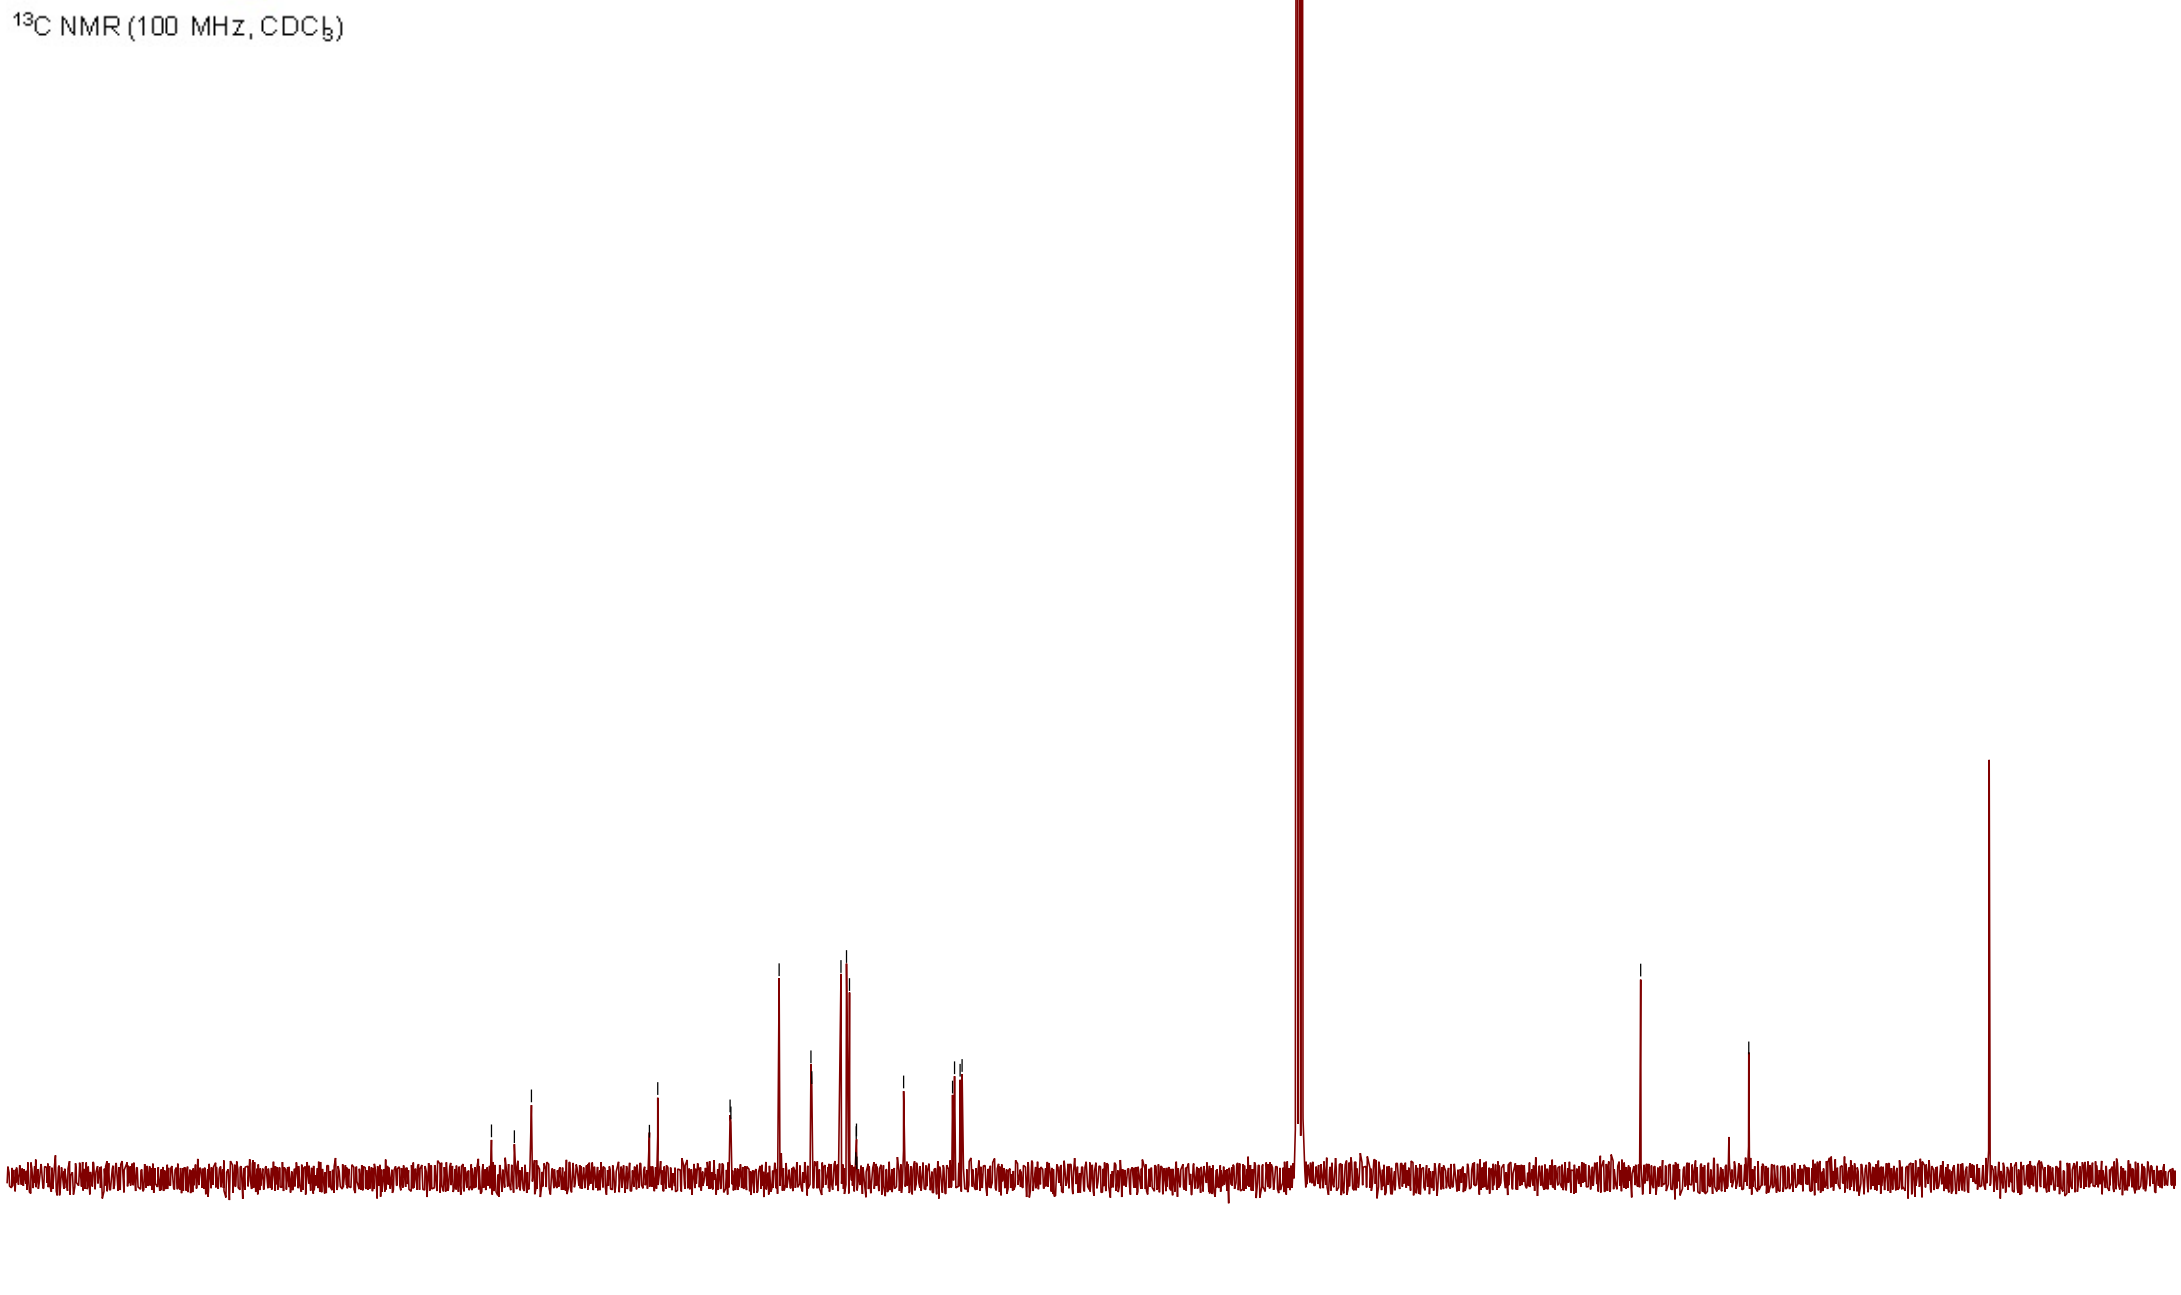

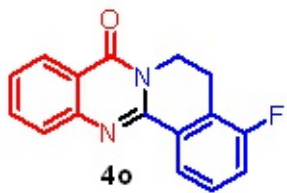

$^{19}\text{F}$  NMR (376 MHz,  $\text{CDCl}_3$ )

---107.579

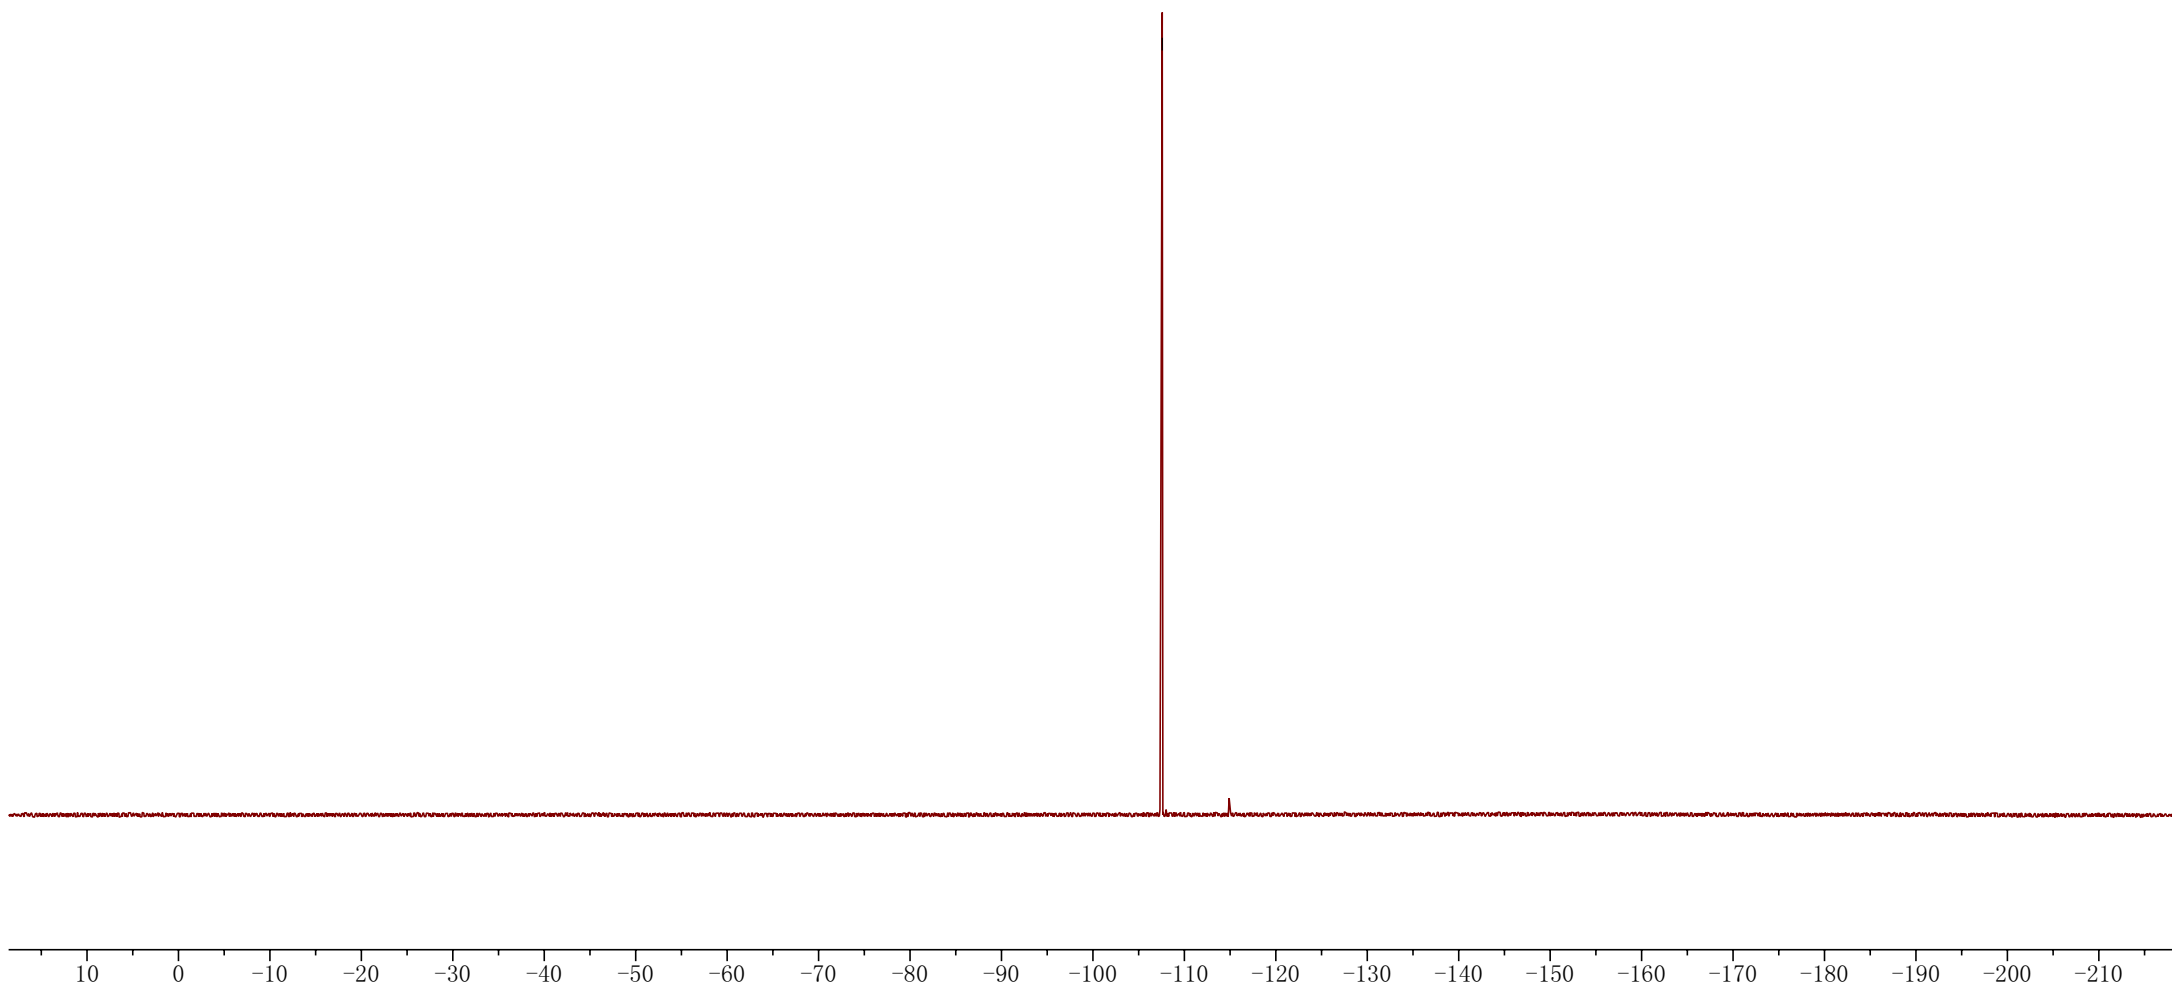



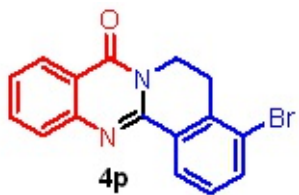

<sup>1</sup>H NMR (400 MHz, CDCl<sub>3</sub>)

8.518  
8.498  
8.333  
8.313  
7.799  
7.784  
7.780  
7.769  
7.765  
7.747  
7.744  
7.727  
7.724  
7.509  
7.503  
7.494  
7.489  
7.484  
7.484  
7.474  
7.468  
7.344  
7.324  
7.304  
7.260  
4.436  
4.420  
4.404  
3.244  
3.227  
3.211

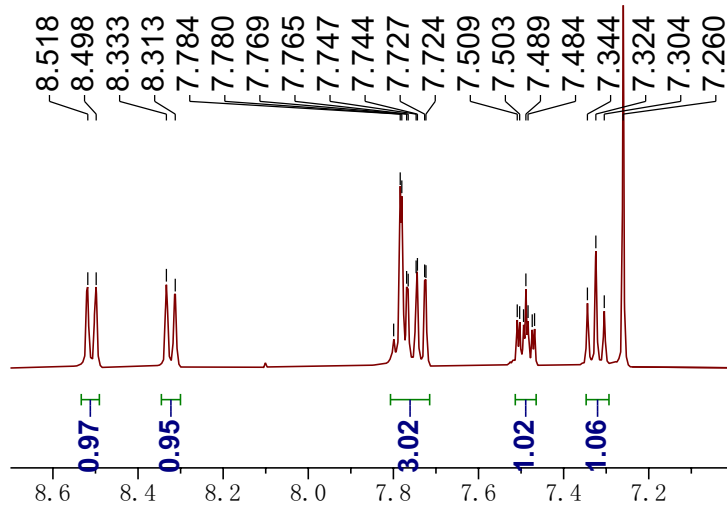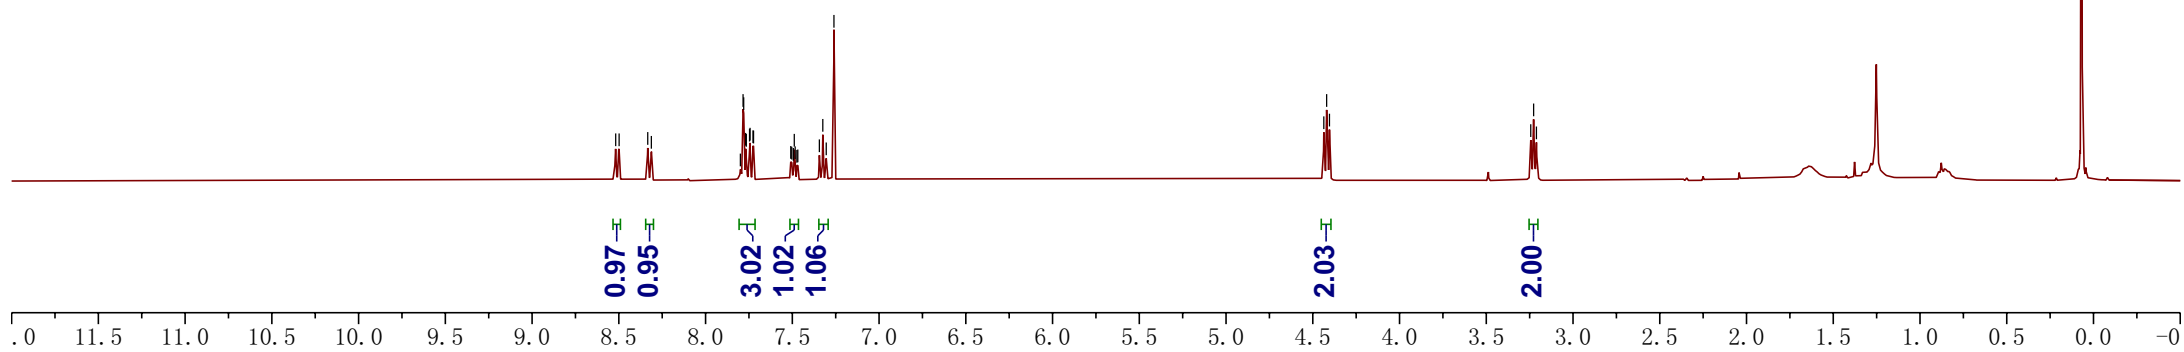

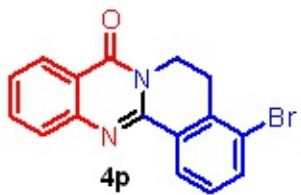

$^{13}\text{C}$  NMR (100 MHz,  $\text{CDCl}_3$ )

—161.66  
—147.80  
—136.91  
—135.62  
—134.54  
—131.85  
—128.82  
—127.87  
—127.51  
—127.07  
—127.05  
—123.47  
—120.90

77.48  
77.16  
76.84

—39.15

—27.55

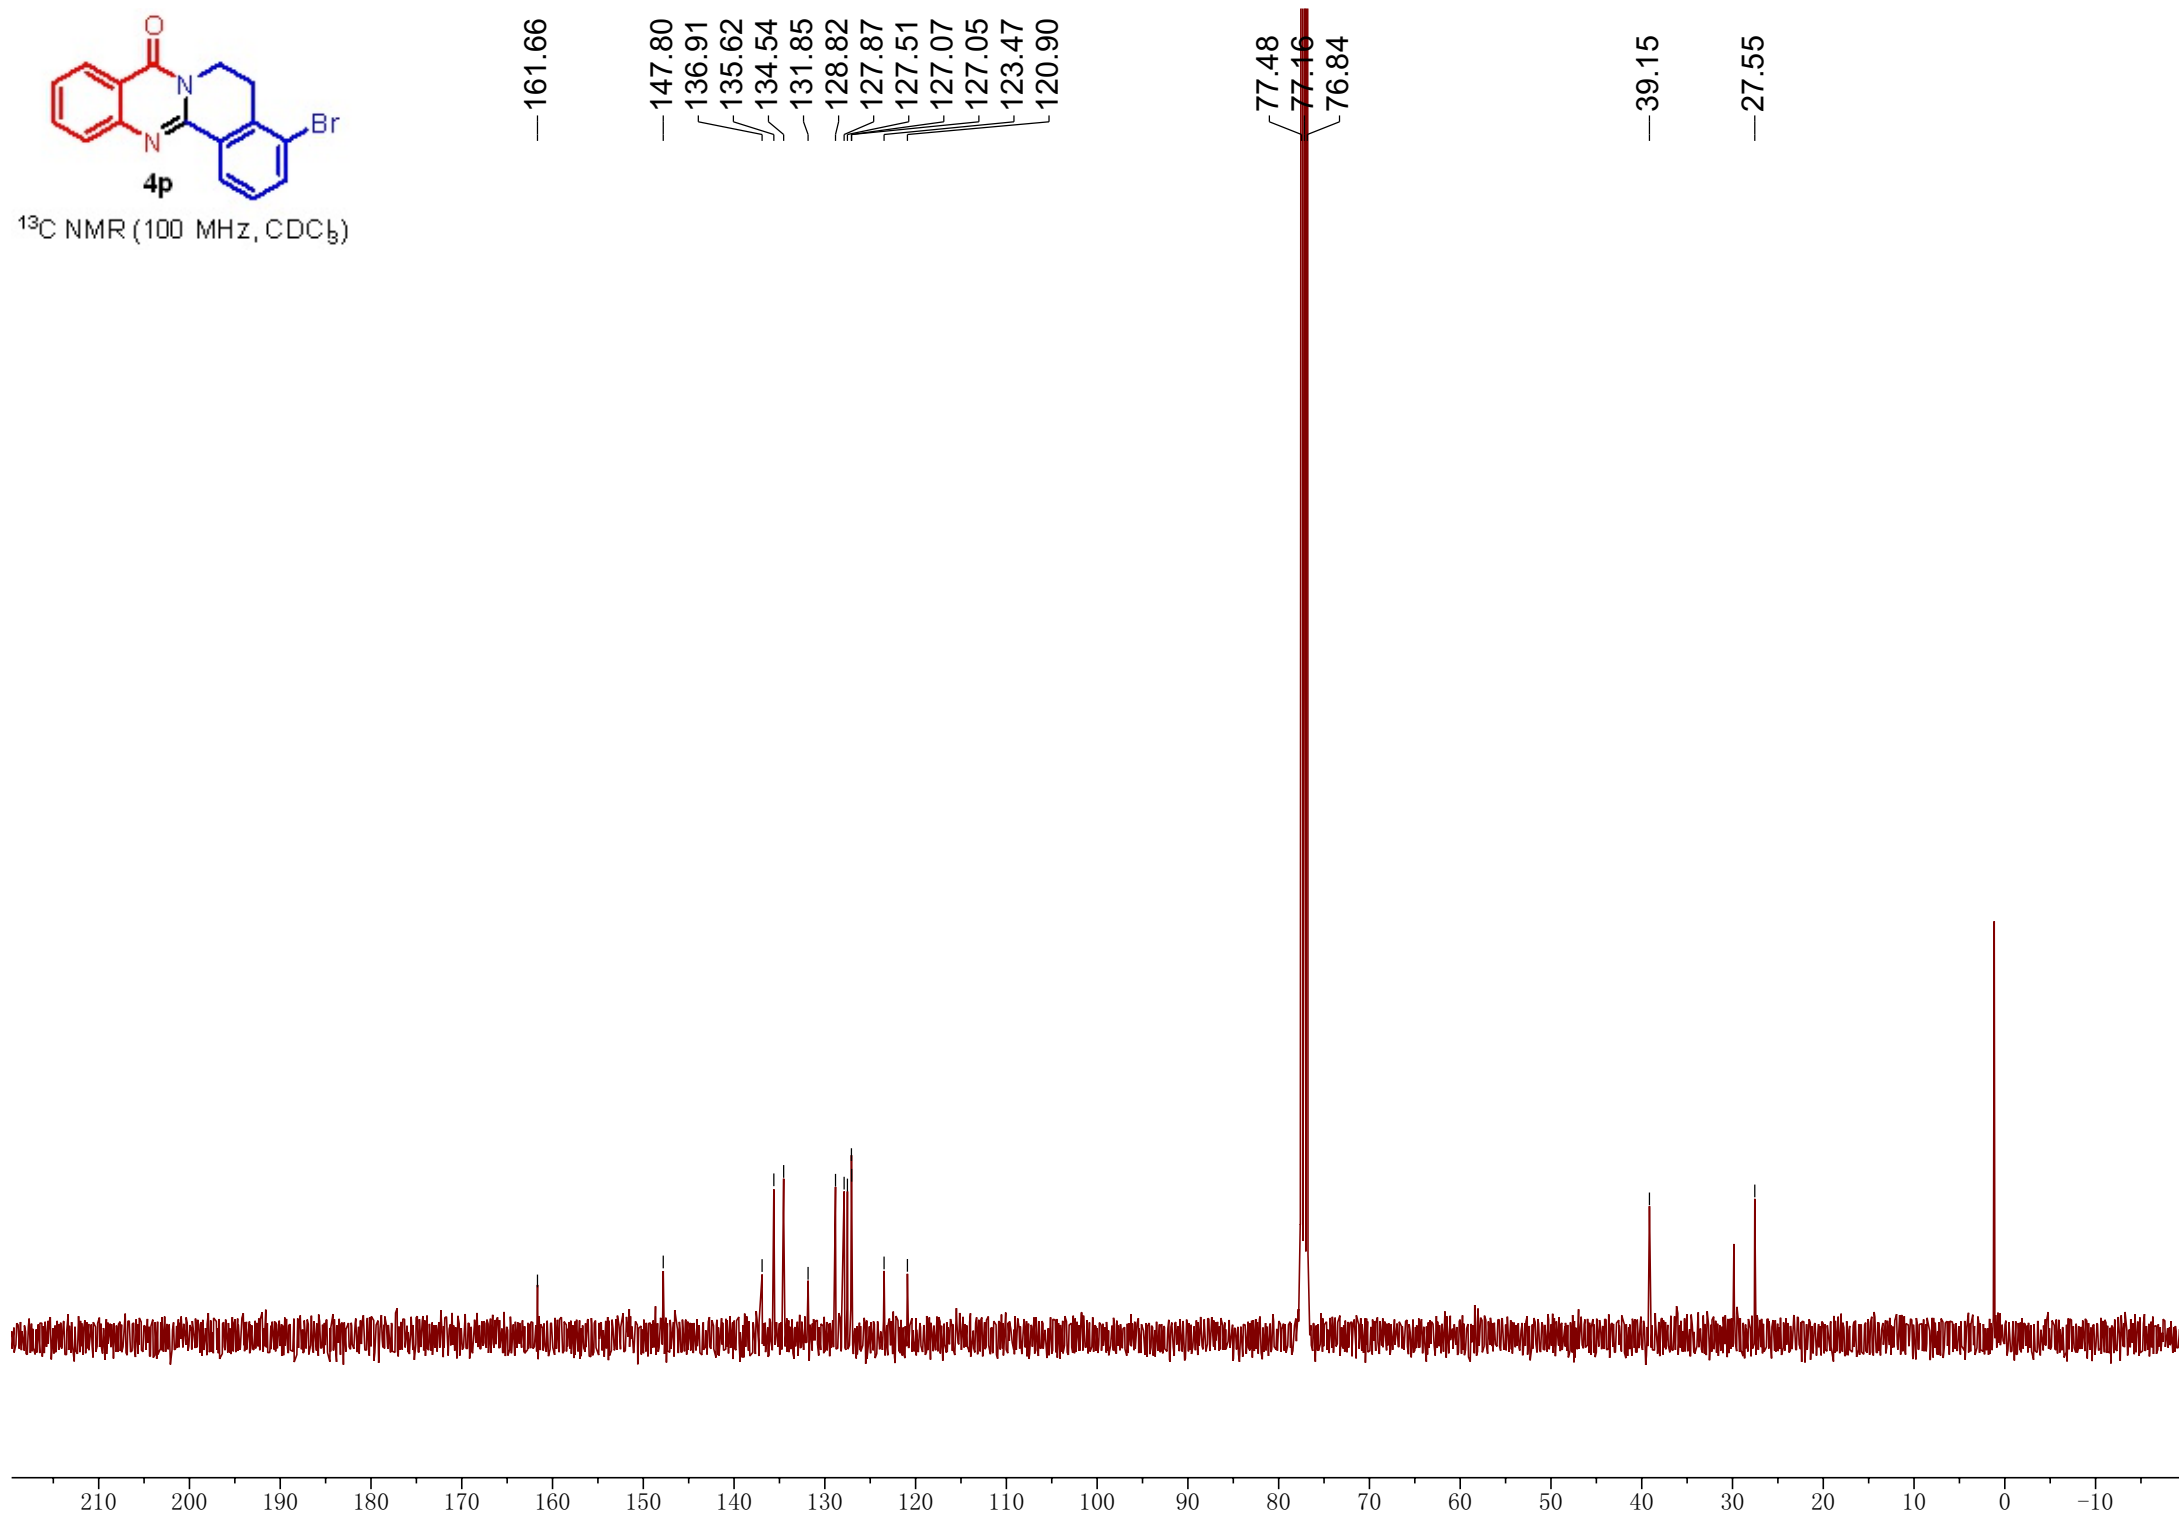

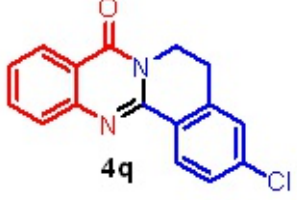

<sup>1</sup>H NMR (400 MHz, DMSO-d<sub>6</sub>)

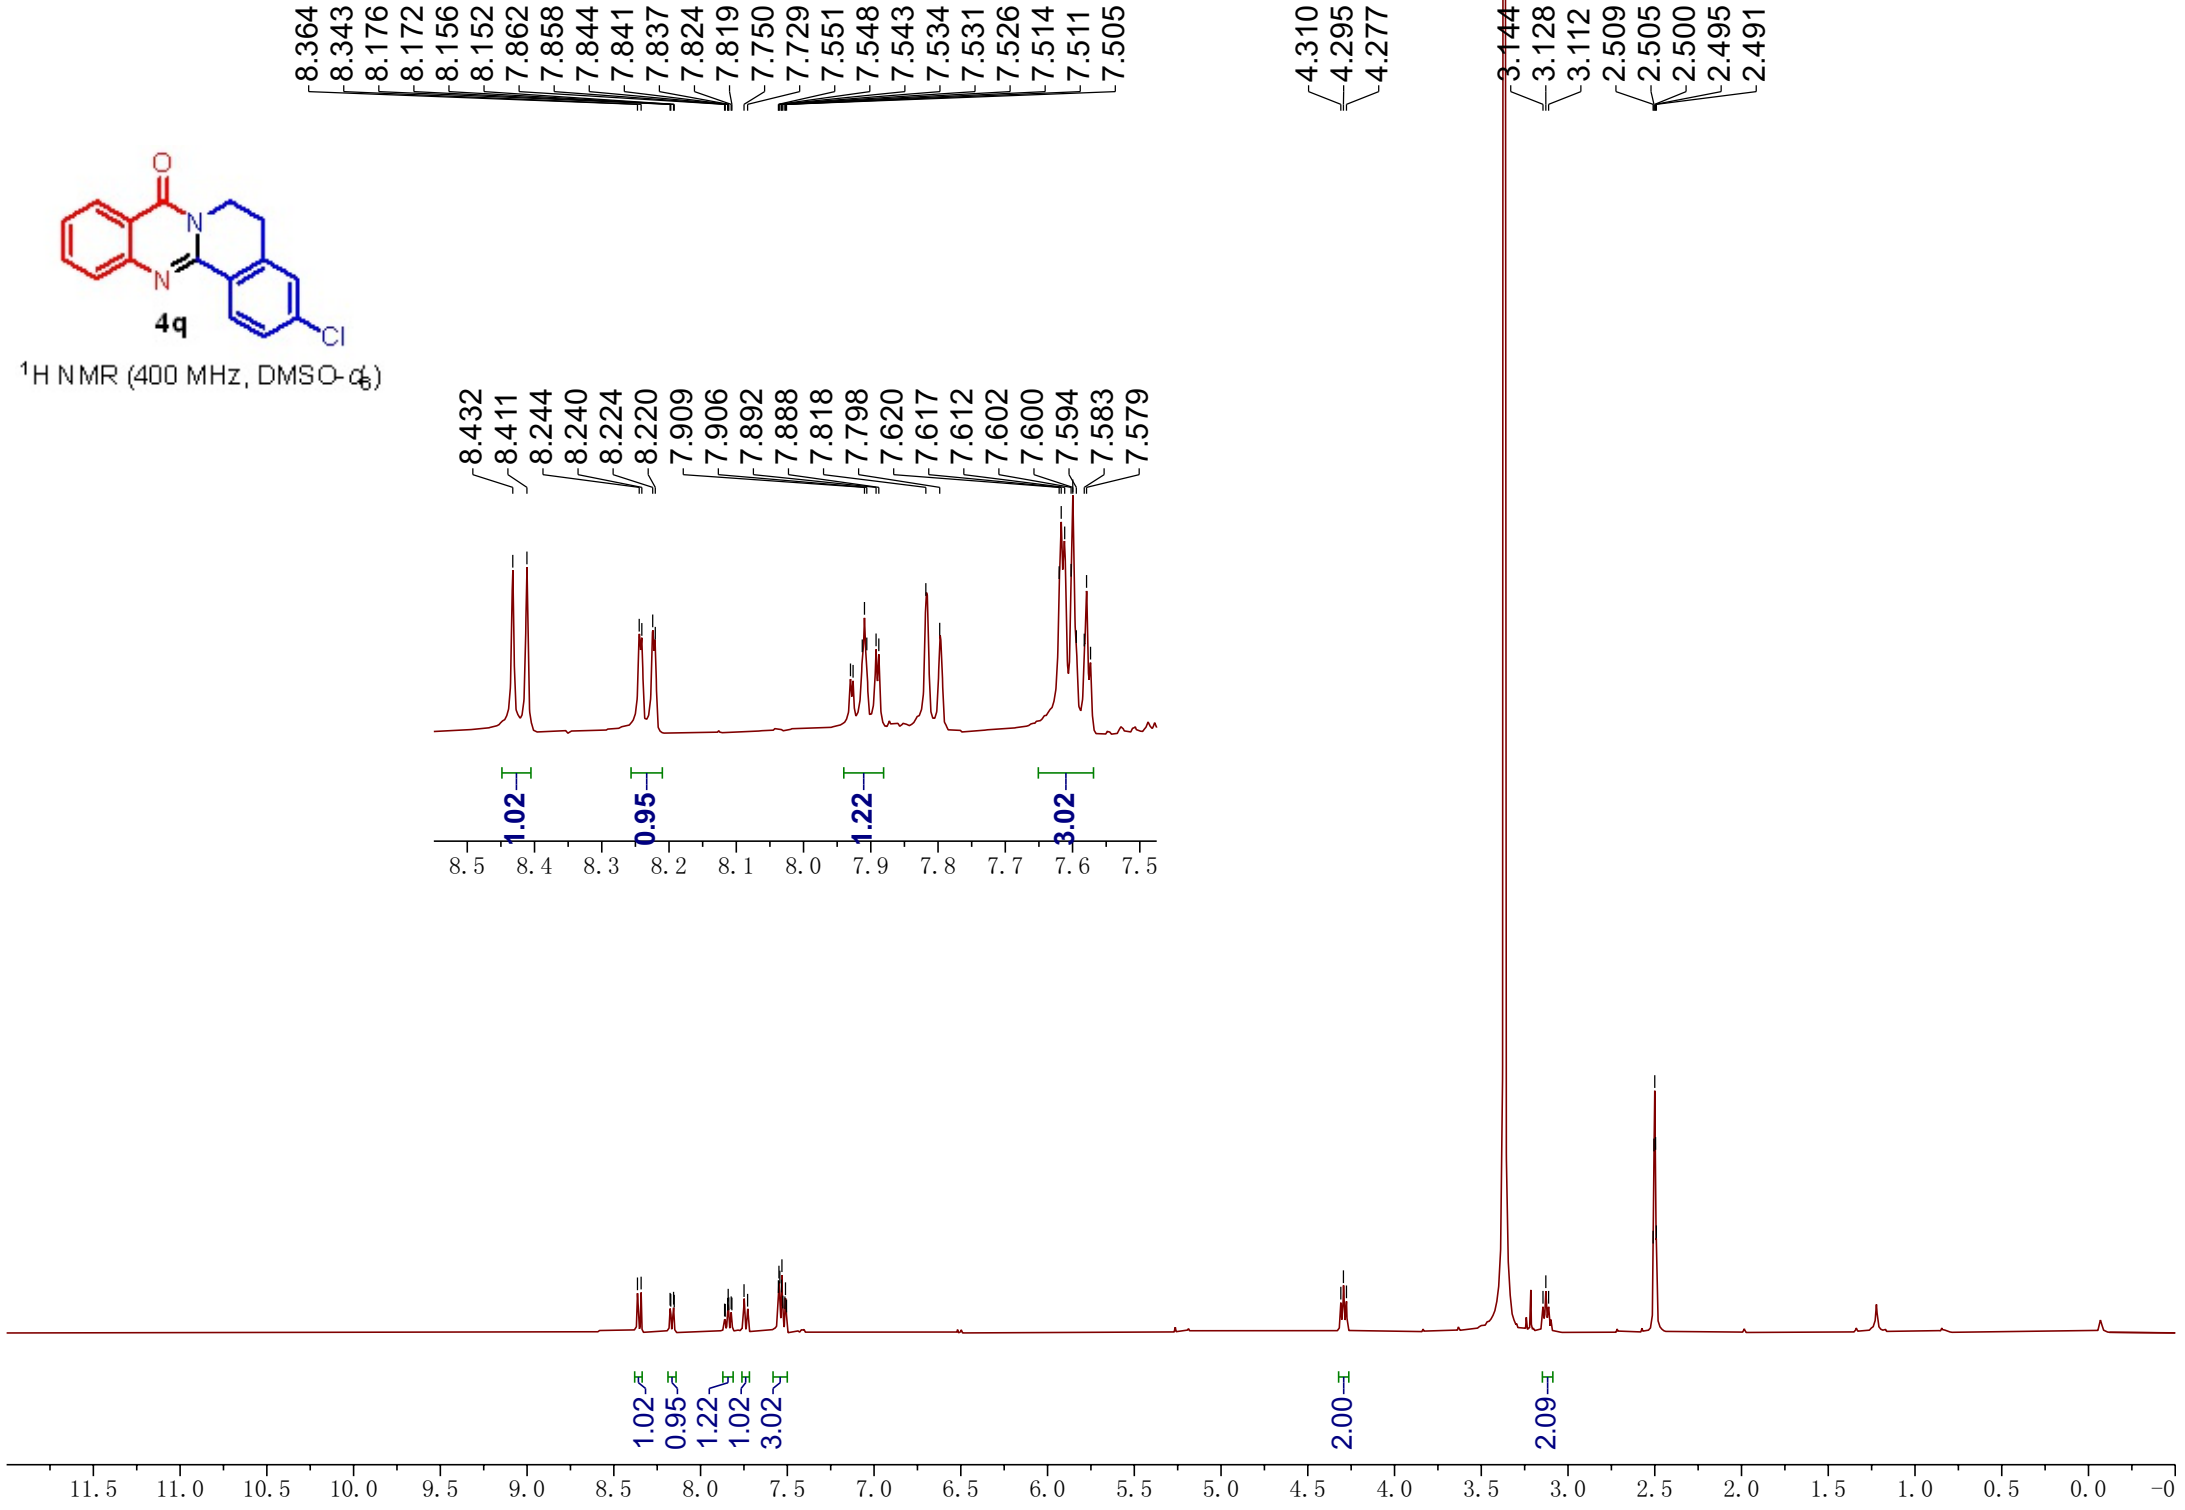

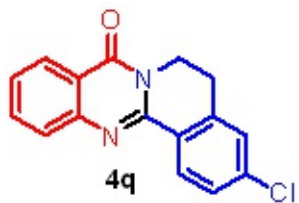

$^{13}\text{C}$  NMR (100 MHz,  $\text{CDCl}_3$ )

— 161.69  
— 148.68  
— 147.73  
— 138.72  
— 137.98  
— 134.50  
— 129.71  
— 128.20  
— 128.14  
— 127.71  
— 127.66  
— 127.05  
— 126.89  
— 120.84

— 77.48  
— 77.16  
— 76.84

— 39.52

— 27.40

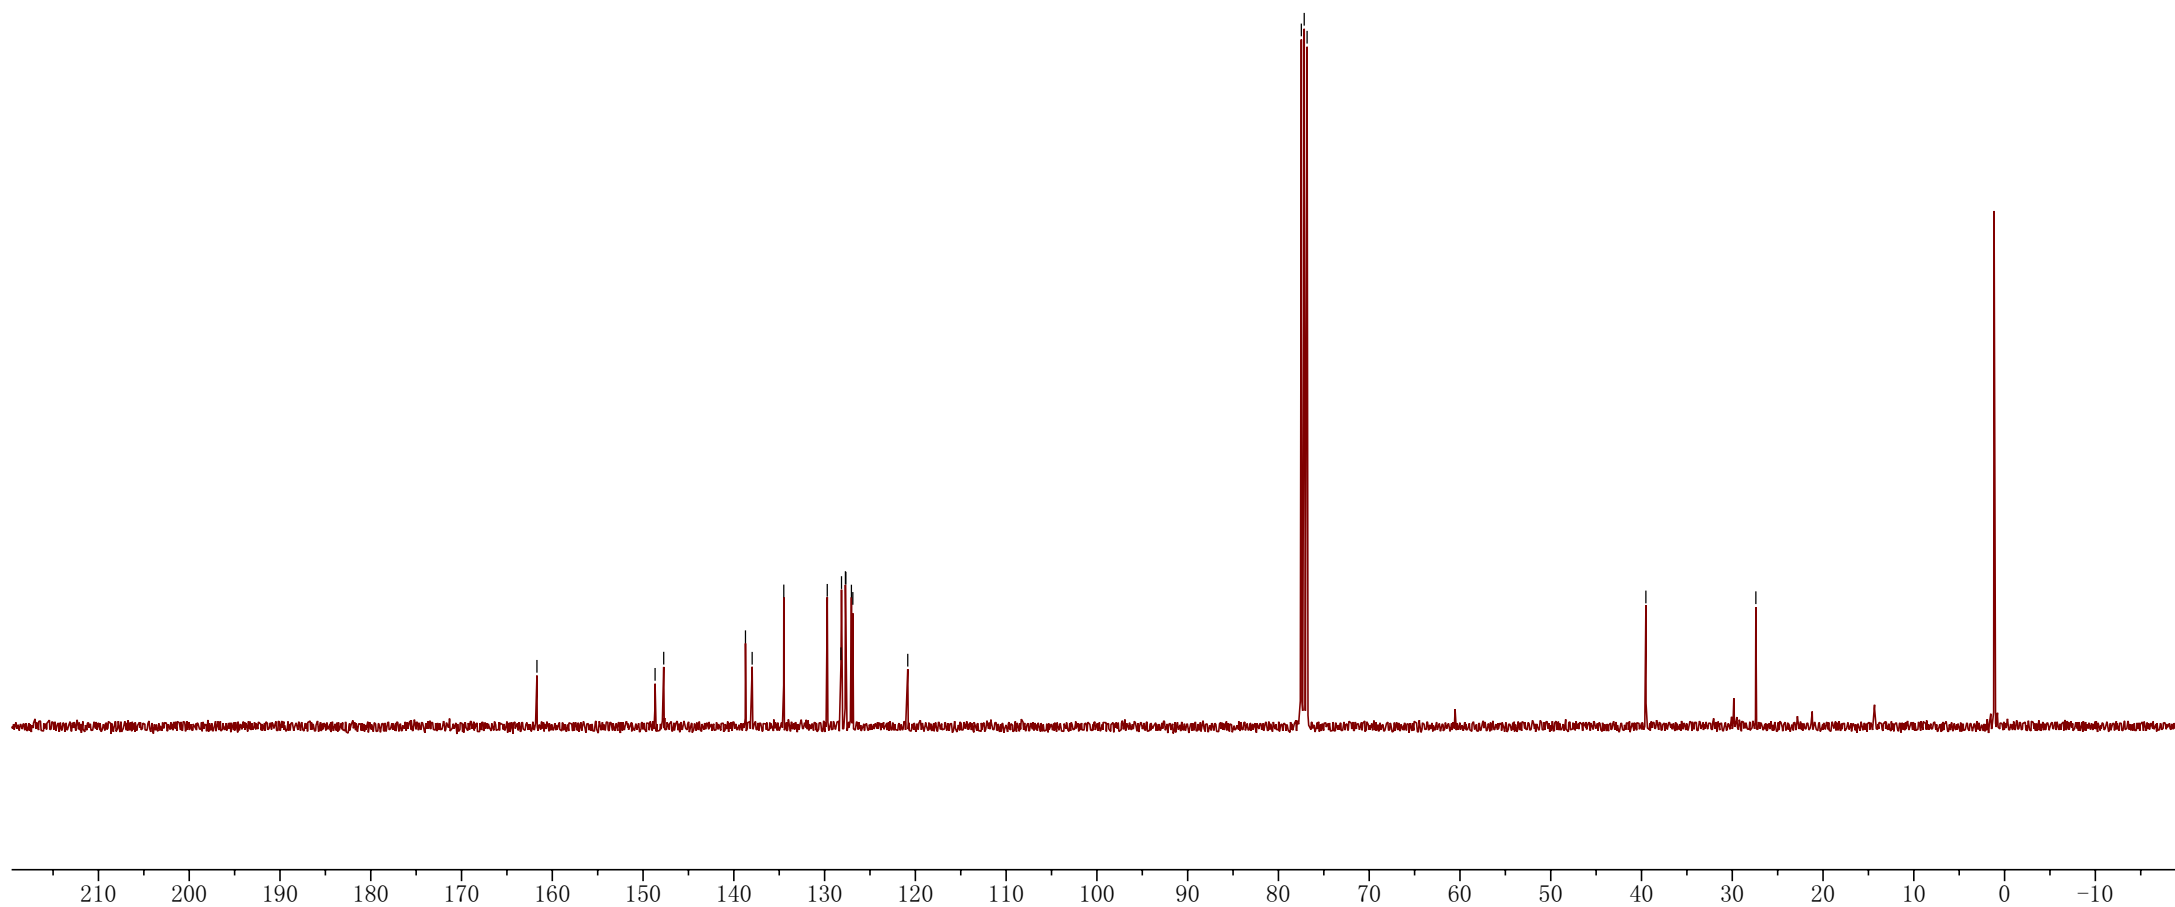

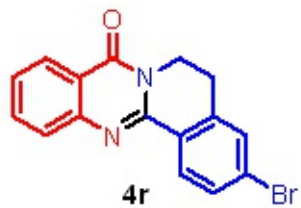

<sup>1</sup>H NMR (400 MHz, CDCl<sub>3</sub>)

8.367  
8.346  
8.314  
8.294  
7.763  
7.759  
7.756  
7.750  
7.748  
7.579  
7.574  
7.558  
7.553  
7.494  
7.485  
7.482  
7.474  
7.463  
7.453  
7.260  
4.422  
4.407  
4.390

3.103  
3.087  
3.070

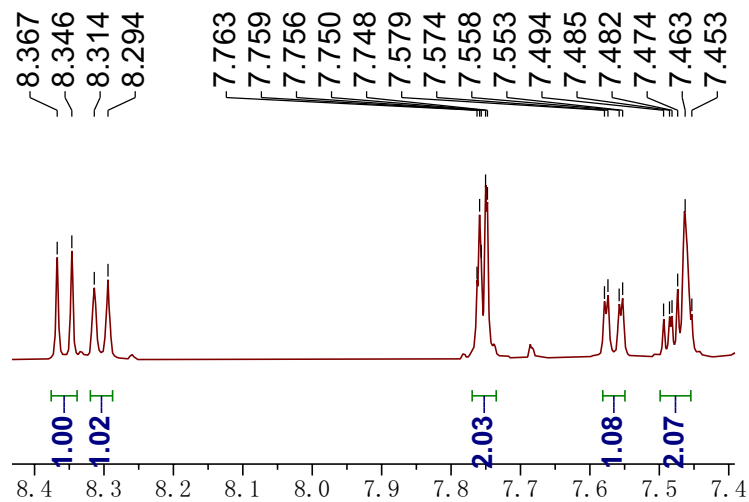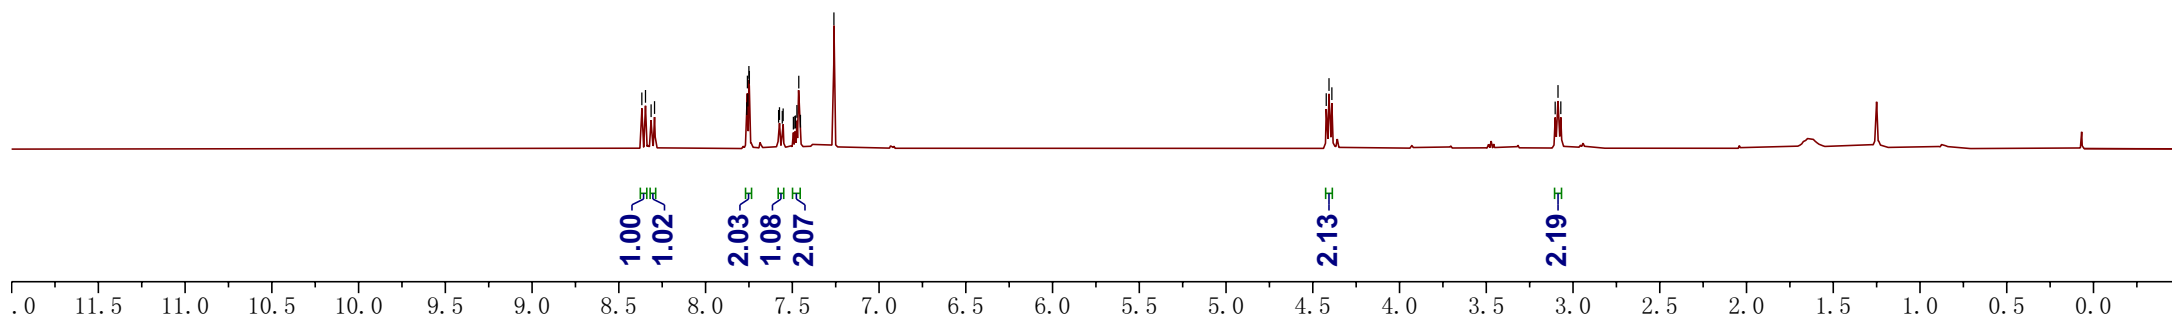

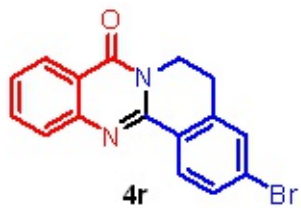

$^{13}\text{C}$  NMR (100 MHz,  $\text{CDCl}_3$ )

—161.70  
148.78  
147.76  
138.92  
134.51  
131.10  
130.65  
129.85  
128.70  
127.76  
127.08  
126.93  
126.56  
120.91

77.48  
77.16  
76.84

—39.55

—27.36

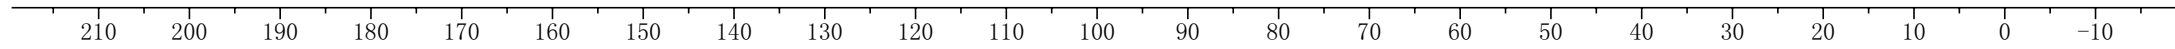

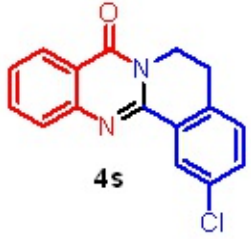

<sup>1</sup>H NMR (400 MHz, DMSO-d<sub>6</sub>)

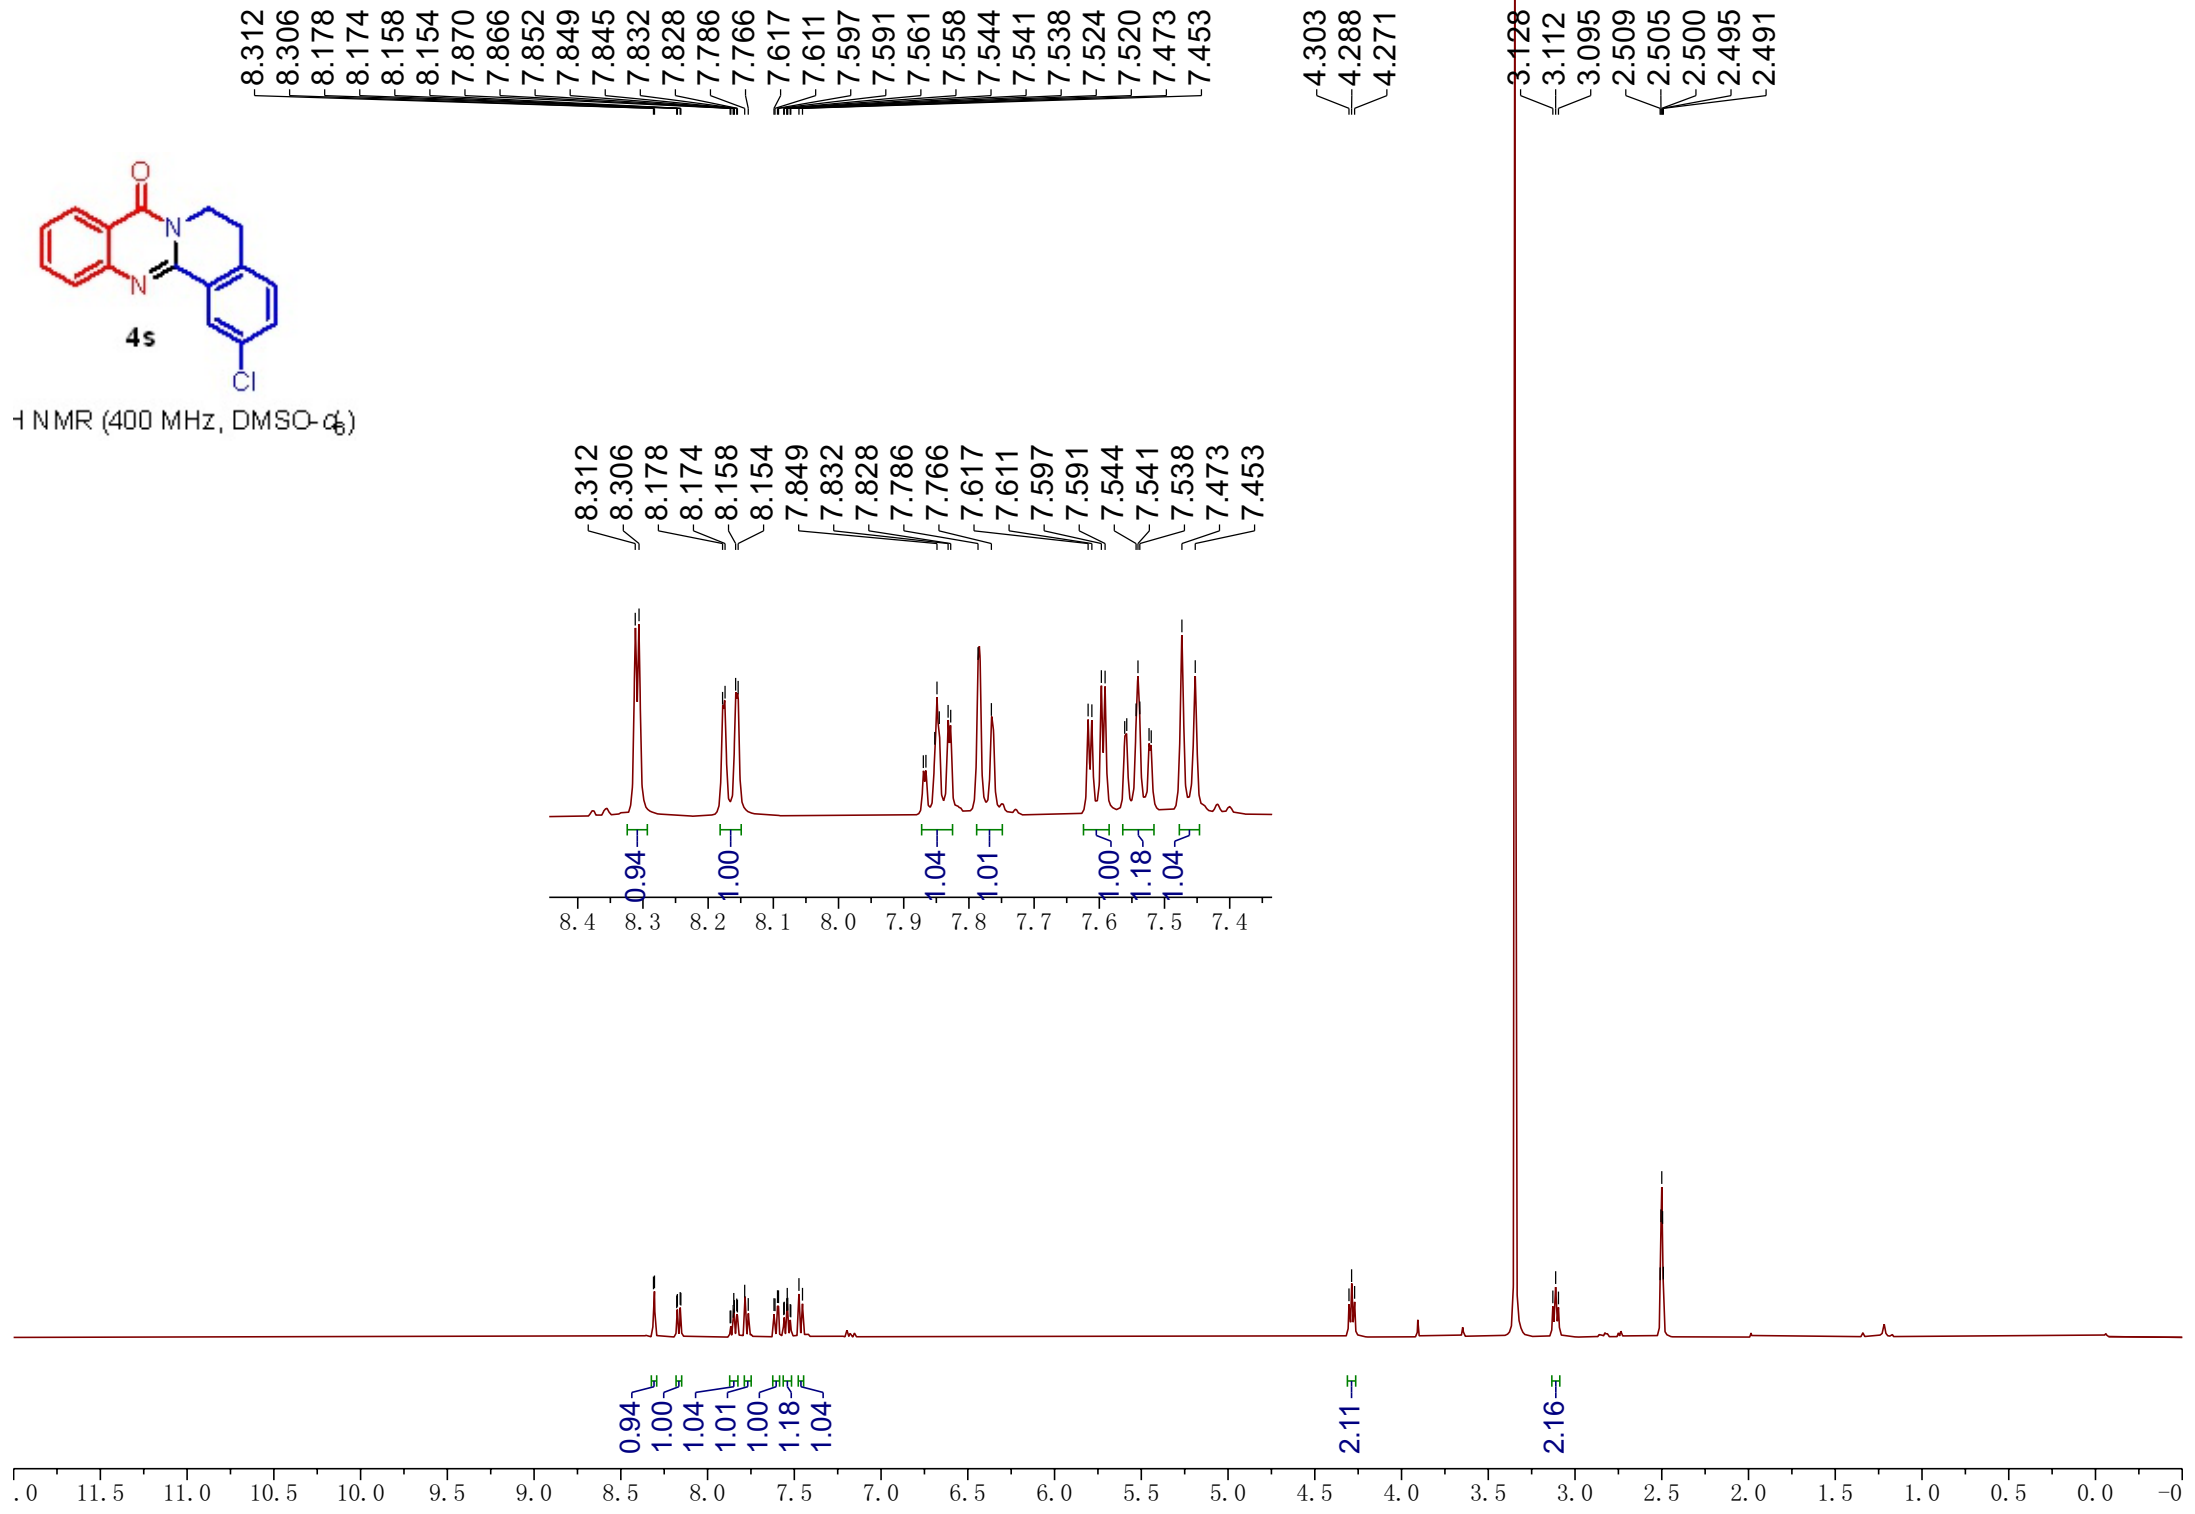

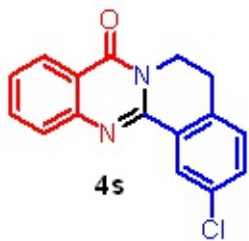

$^{13}\text{C}$  NMR (100 MHz,  $\text{CDCl}_3$ )

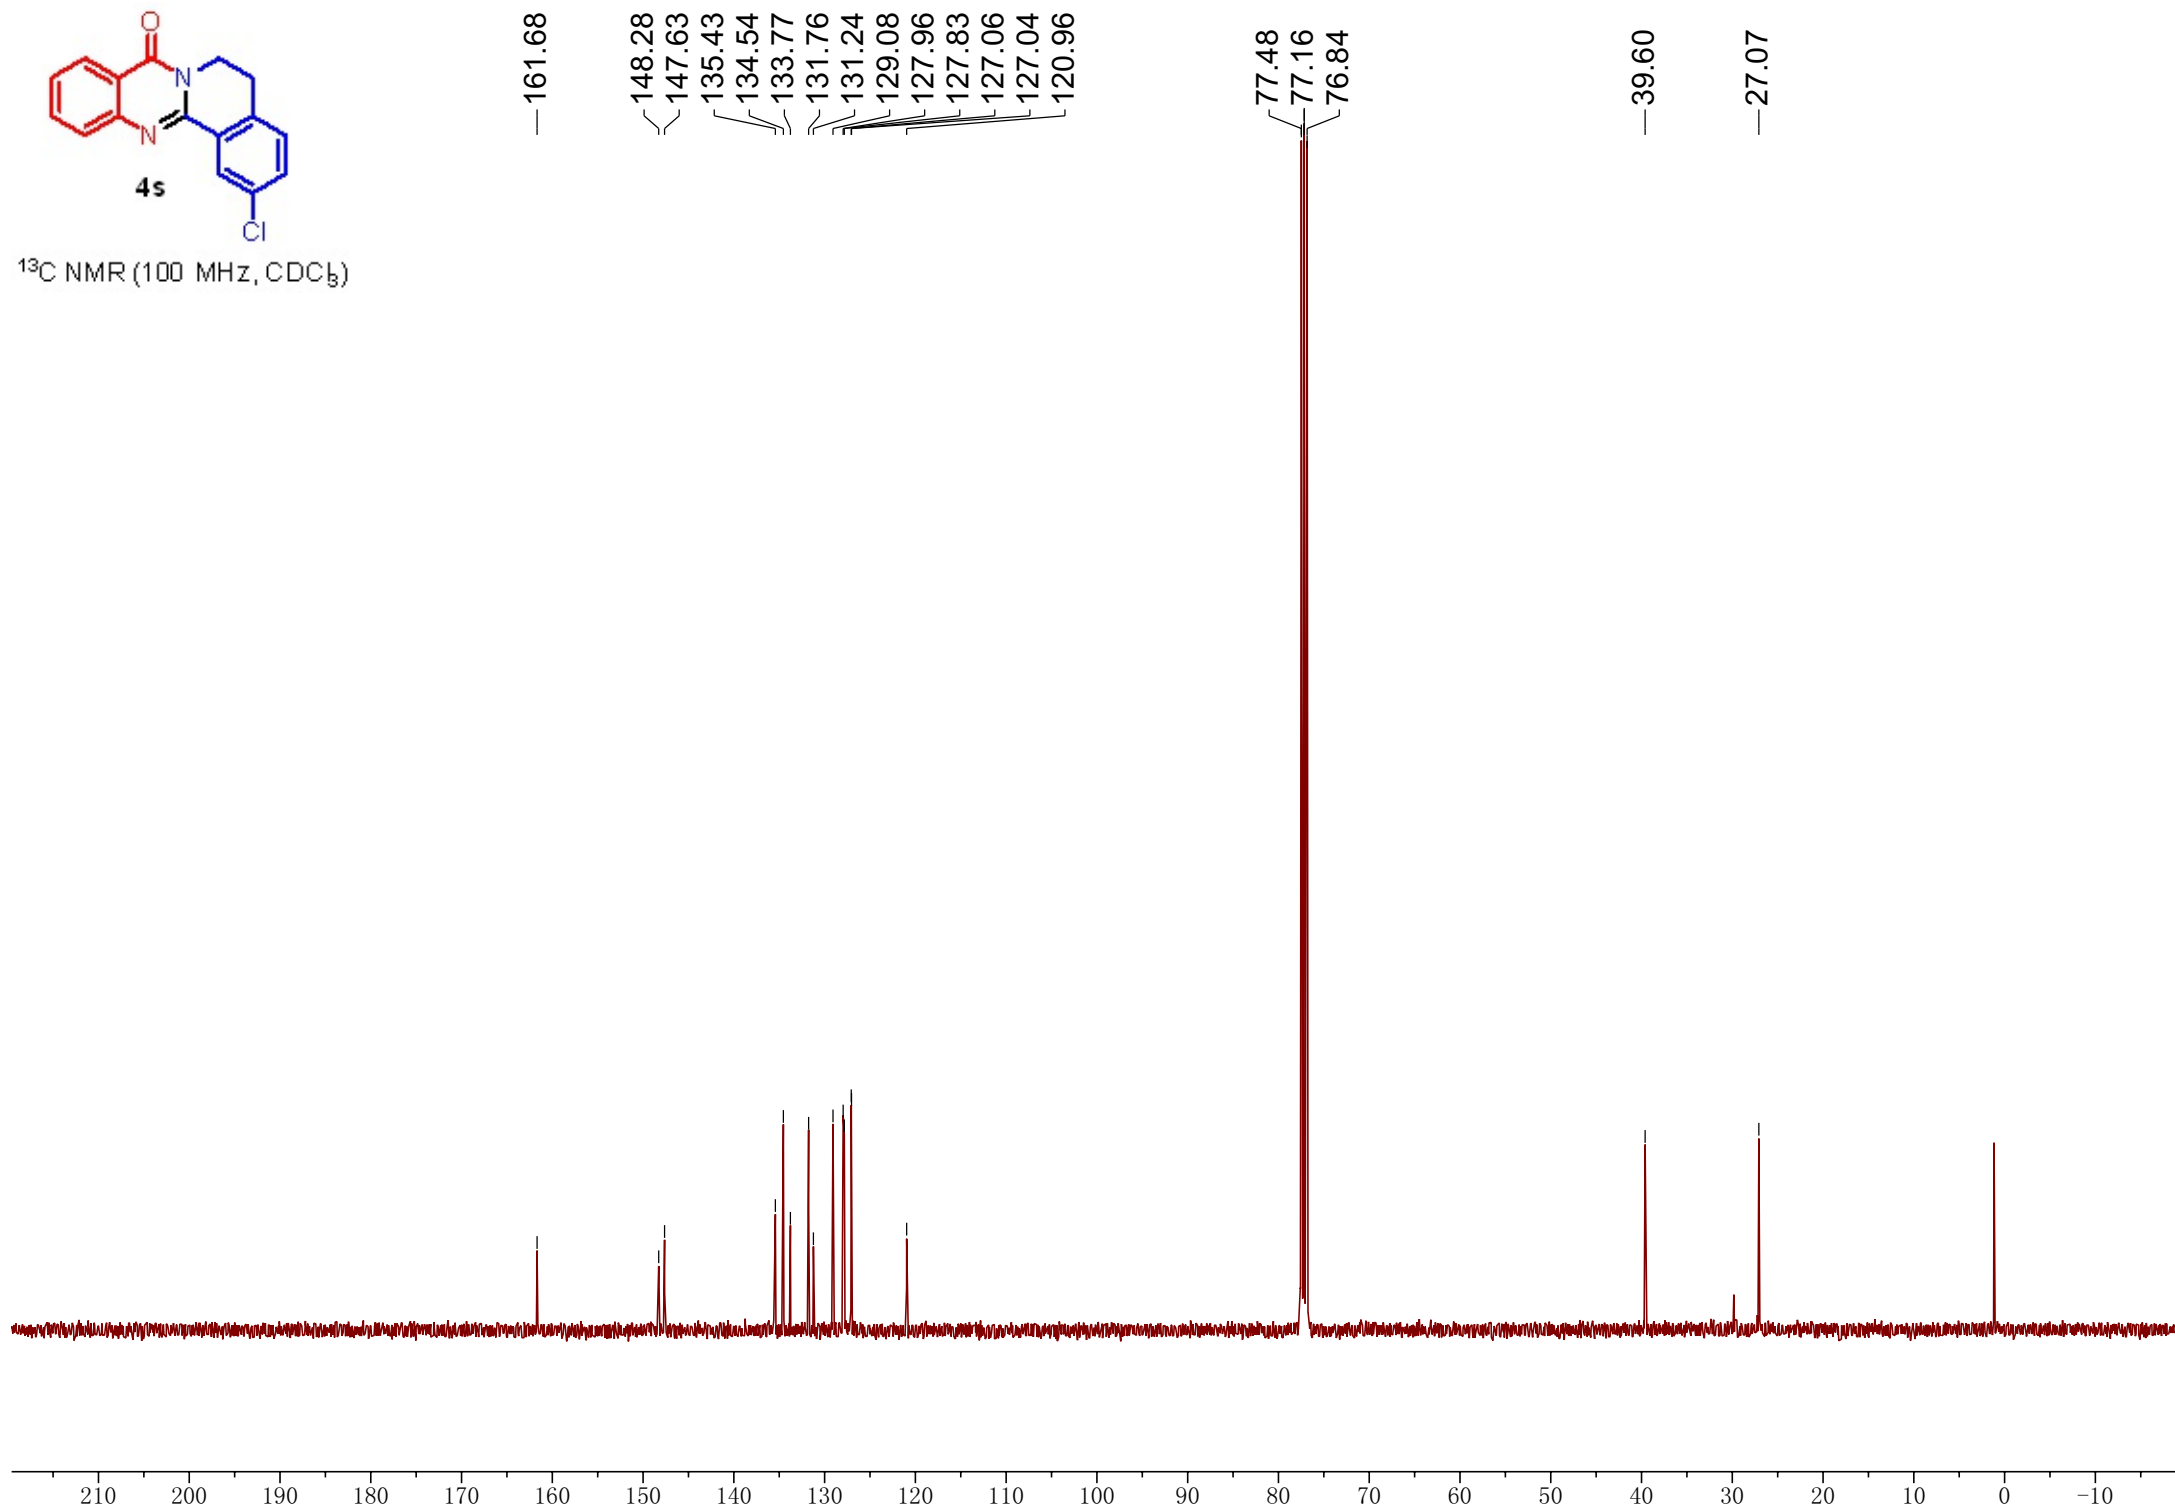



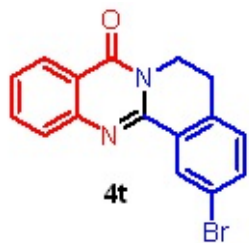

<sup>1</sup>H NMR (400 MHz, CDCl<sub>3</sub>)

8.635  
8.630  
8.317  
8.297  
7.779  
7.768  
7.600  
7.594  
7.580  
7.574  
7.503  
7.494  
7.491  
7.483  
7.475  
7.470  
7.462  
7.260  
7.185  
7.165  
4.418  
4.402  
4.386

3.078  
3.062  
3.045

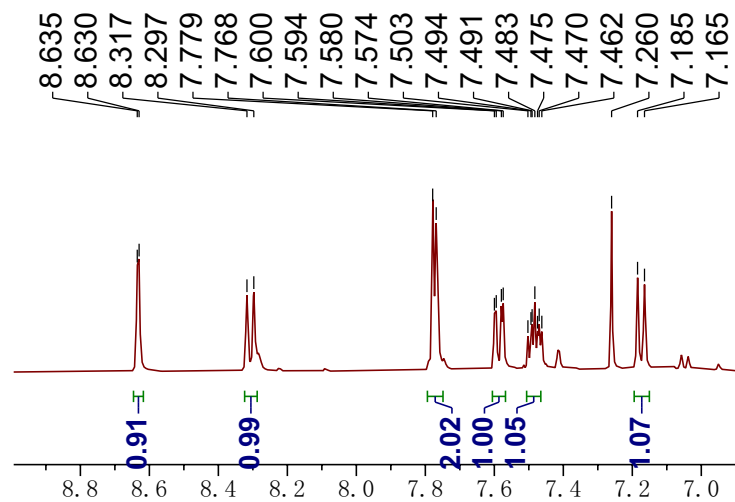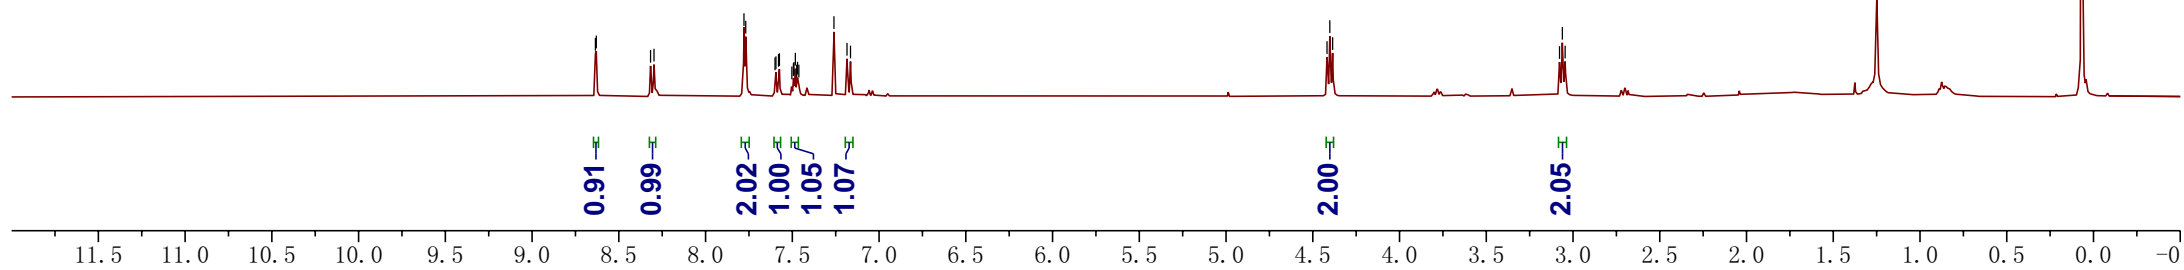

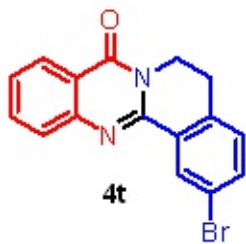

$^{13}\text{C}$  NMR (100 MHz,  $\text{CDCl}_3$ )

—161.68  
148.14  
147.65  
135.92  
134.65  
134.56  
131.53  
130.92  
129.32  
127.86  
127.08  
127.05  
121.59  
120.98

77.48  
77.16  
76.84

—39.56

—27.17

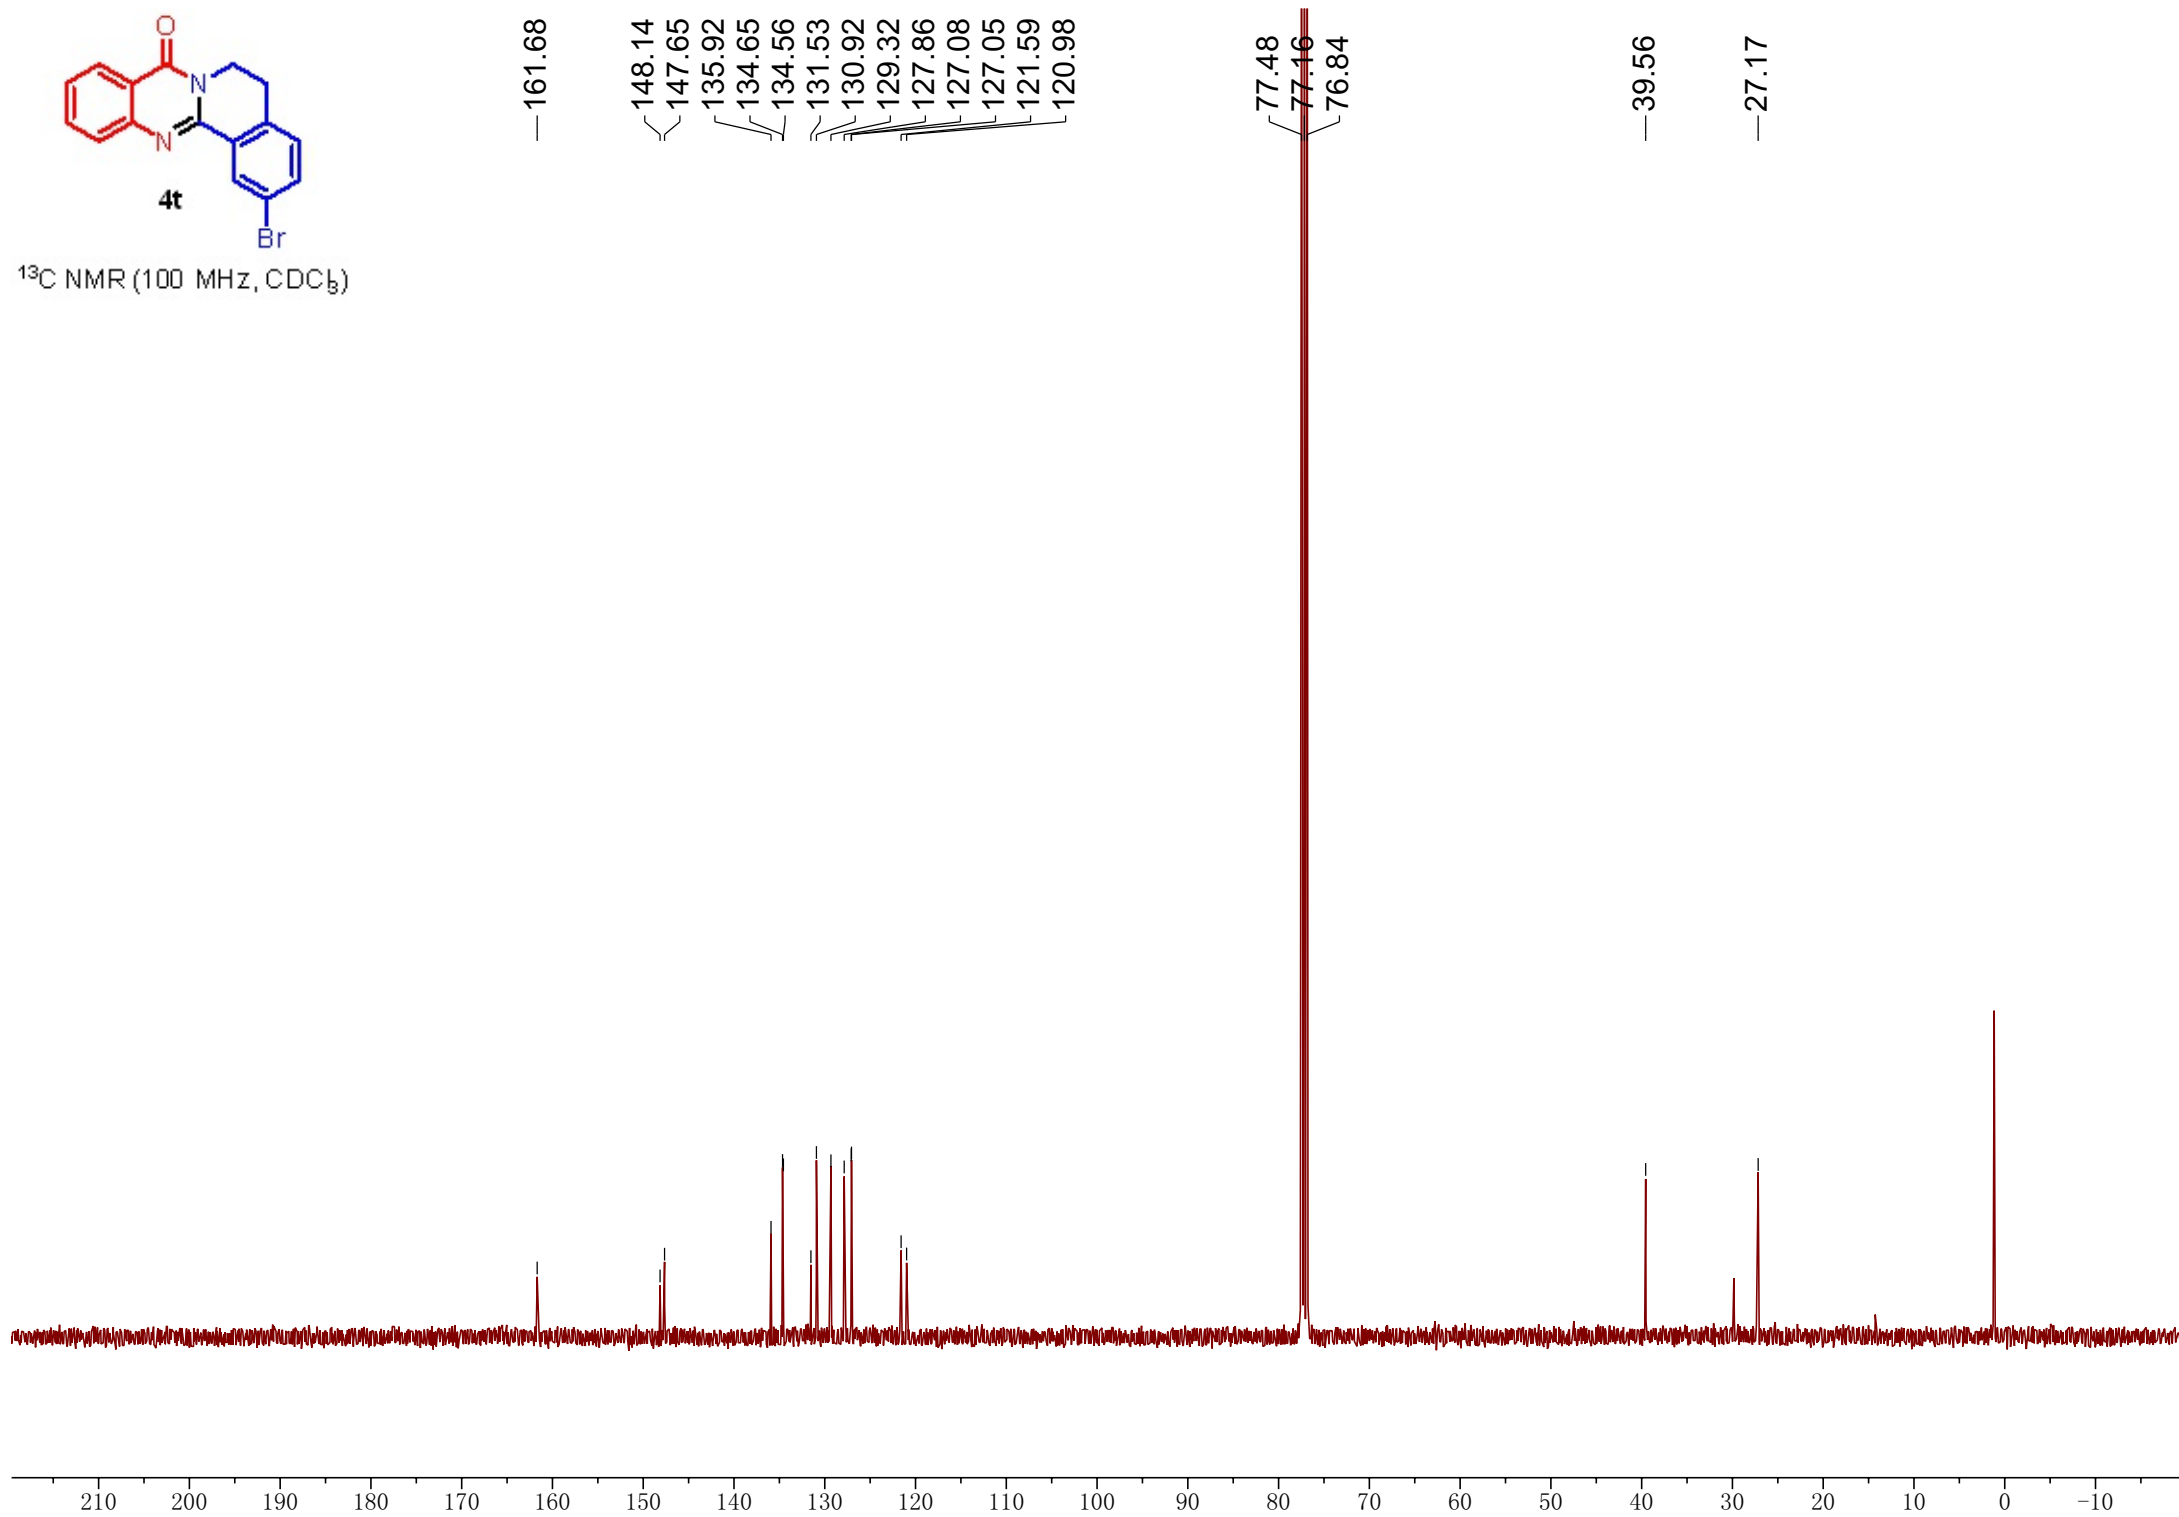

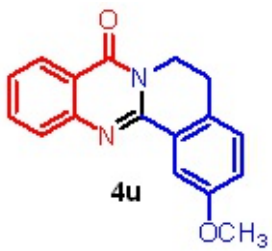

<sup>1</sup>H NMR (400 MHz, CDCl<sub>3</sub>)

8.328  
8.309  
8.011  
8.004  
7.800  
7.783  
7.755  
7.739  
7.472  
7.468  
7.464  
7.260  
7.064  
7.057  
7.043  
7.036

4.415  
4.398  
4.382  
—  
3.939

3.055  
3.039  
3.023

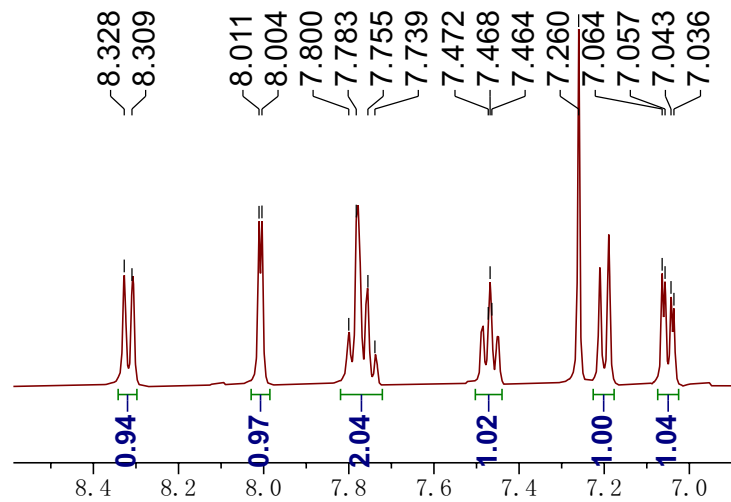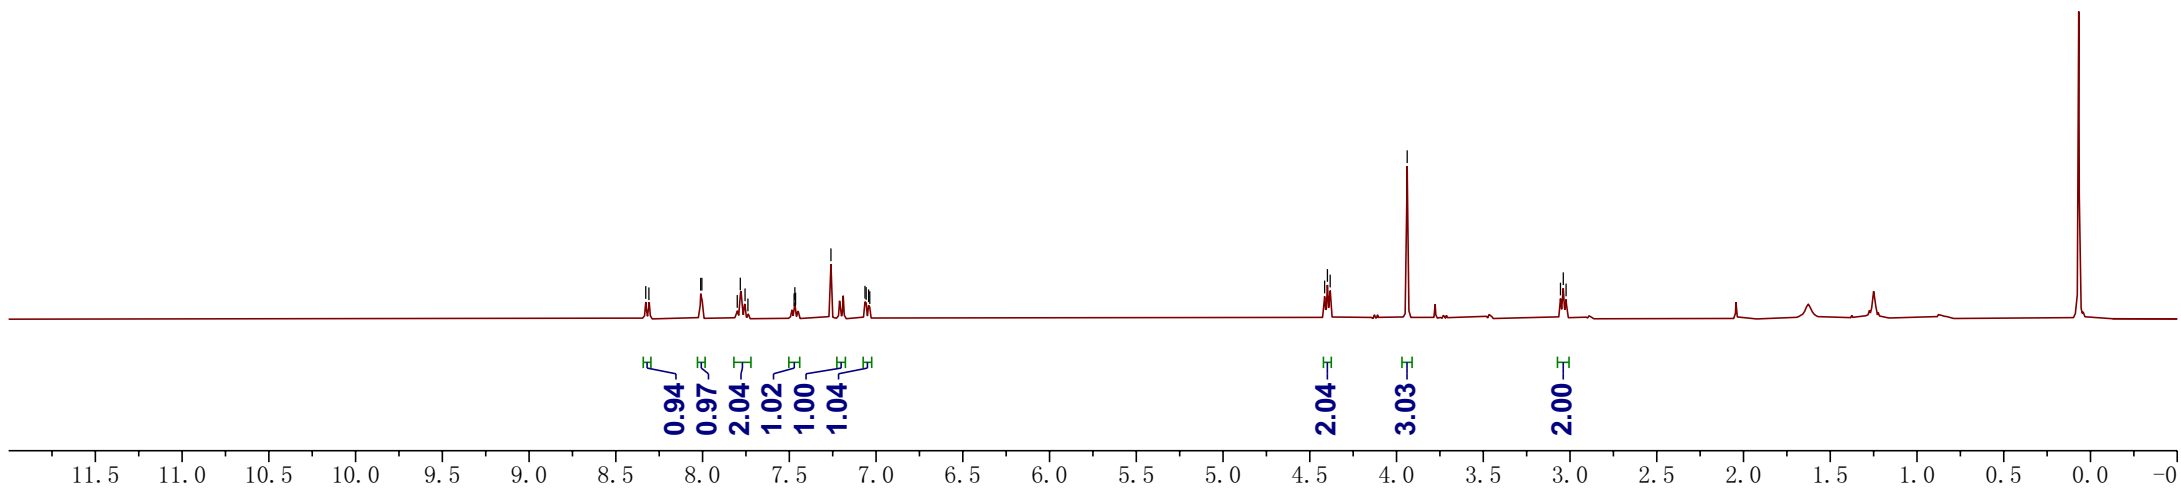

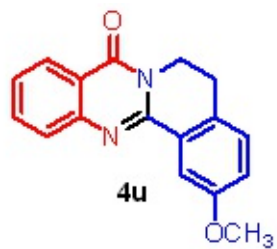

$^{13}\text{C}$  NMR (100 MHz,  $\text{CDCl}_3$ )

161.91  
159.20  
149.46  
147.83  
134.37  
130.57  
129.60  
128.78  
127.72  
127.02  
126.72  
120.92  
119.42  
111.40

77.48  
77.16  
76.84

55.78

40.04

26.76

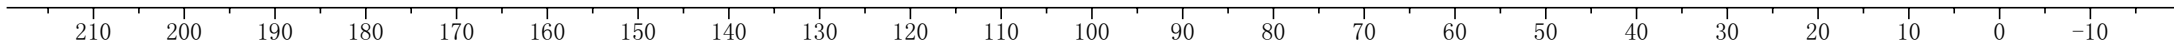

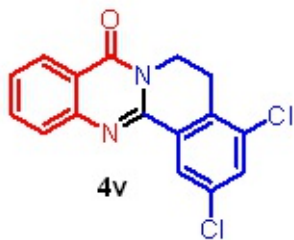

<sup>1</sup>H NMR (400 MHz, CDCl<sub>3</sub>)

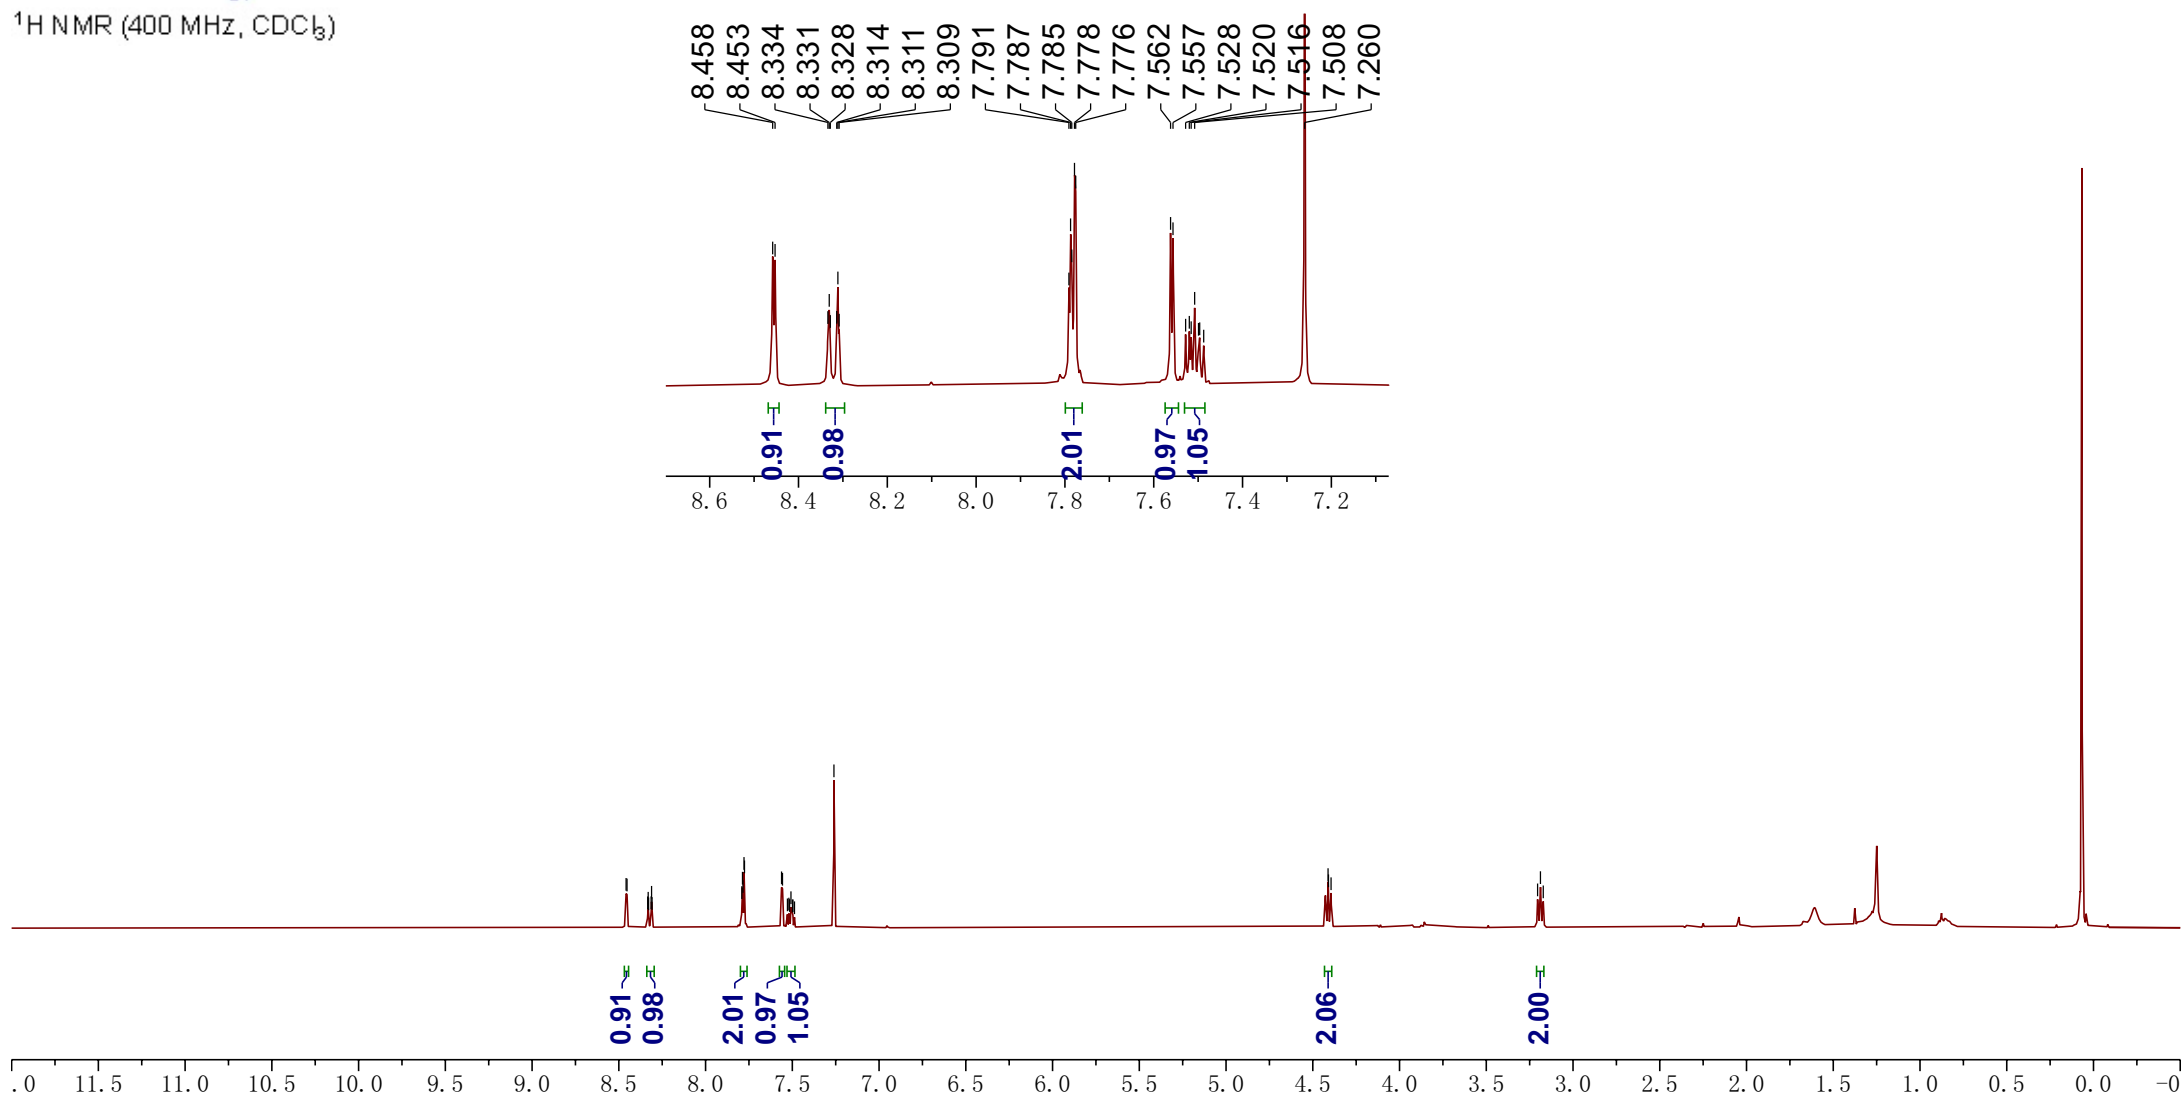

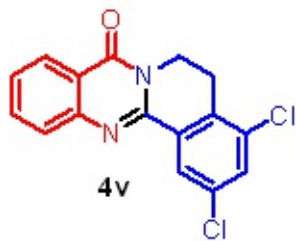

$^{13}\text{C}$  NMR (100 MHz,  $\text{CDCl}_3$ )

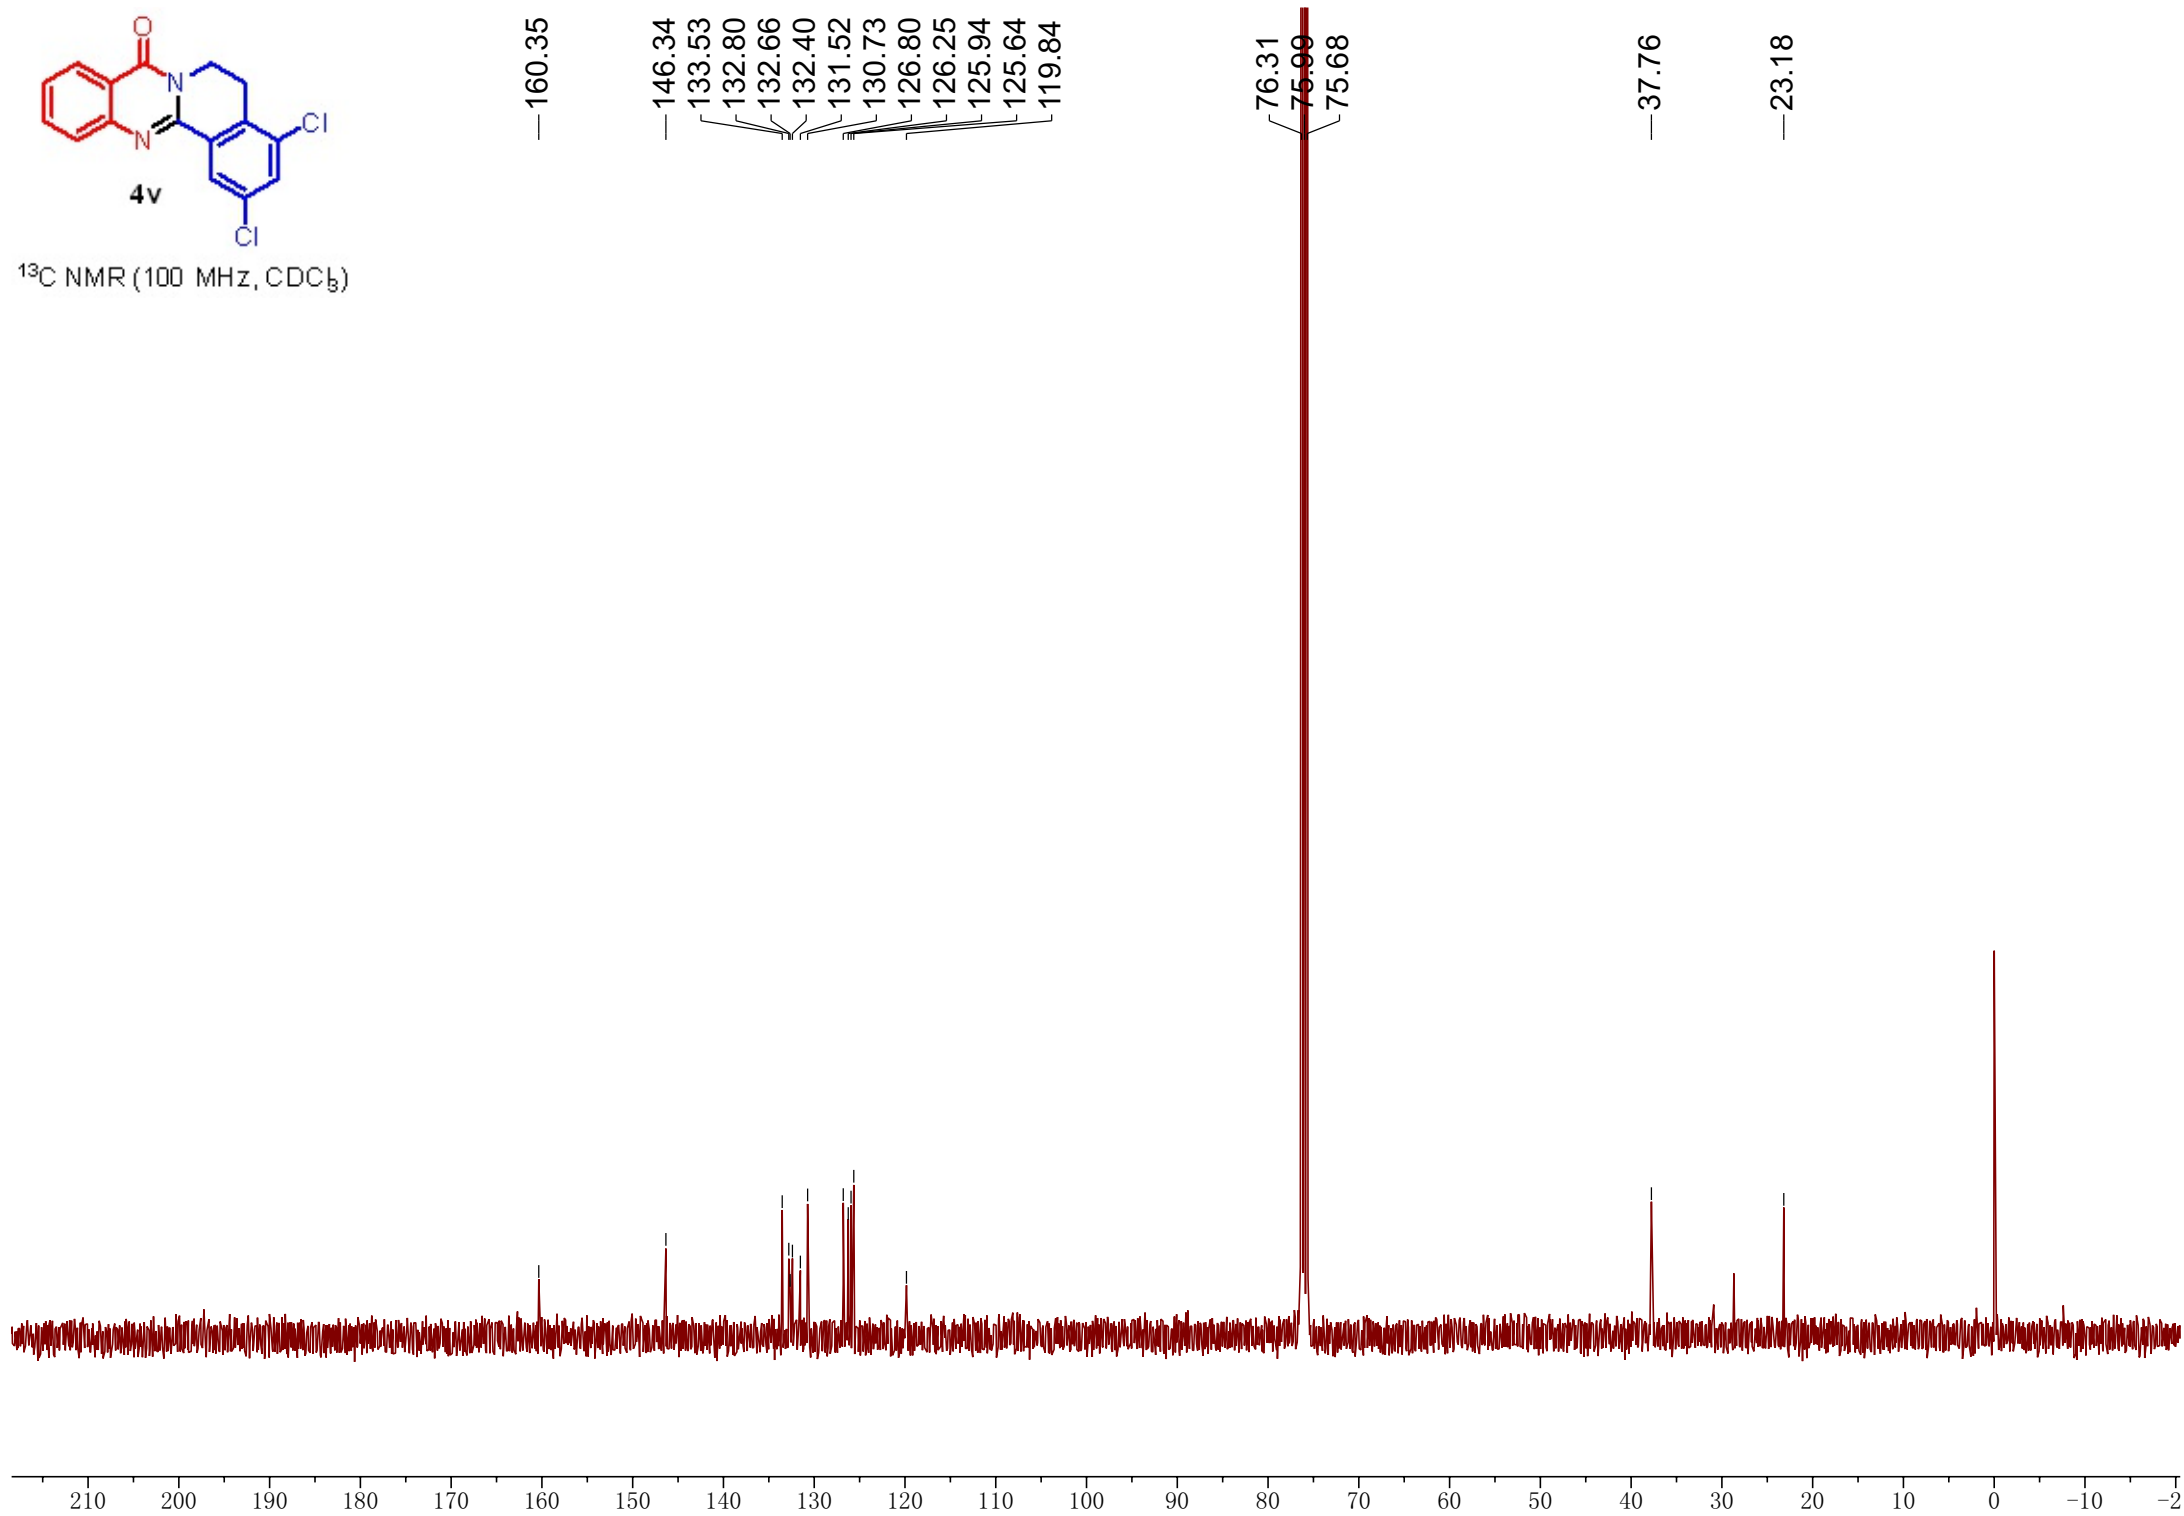

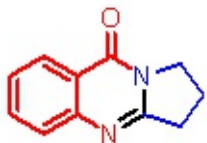

4w

$^1\text{H}$  NMR (400 MHz,  $\text{CDCl}_3$ )

7.673  
7.671  
7.668  
7.655  
7.652  
7.650  
7.536  
7.534  
7.520  
7.518  
7.515  
7.506  
7.503  
7.488  
7.485  
7.469  
7.466  
7.260

1.332  
1.282  
1.251

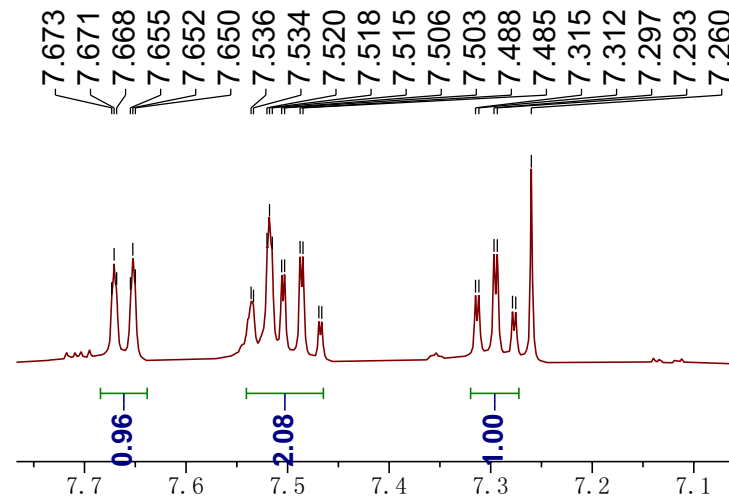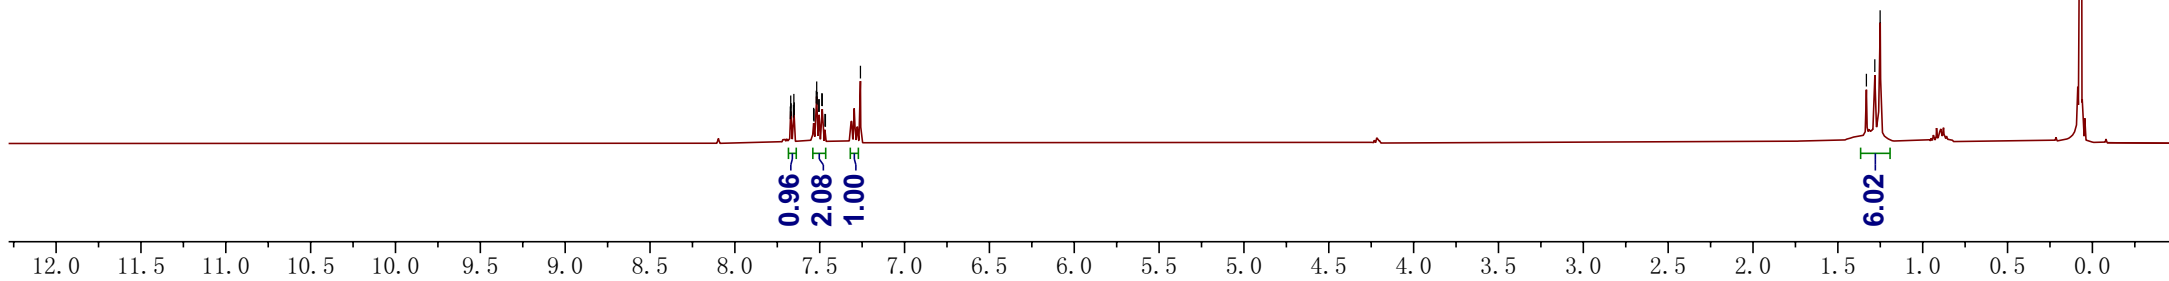

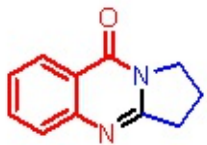

4w

$^{13}\text{C}$  NMR (100 MHz,  $\text{CDCl}_3$ )

— 144.59

— 134.85

— 134.31

— 129.24

— 124.49

— 120.46

— 77.48

— 77.16

— 76.84

— 31.58

— 30.33

— 29.85

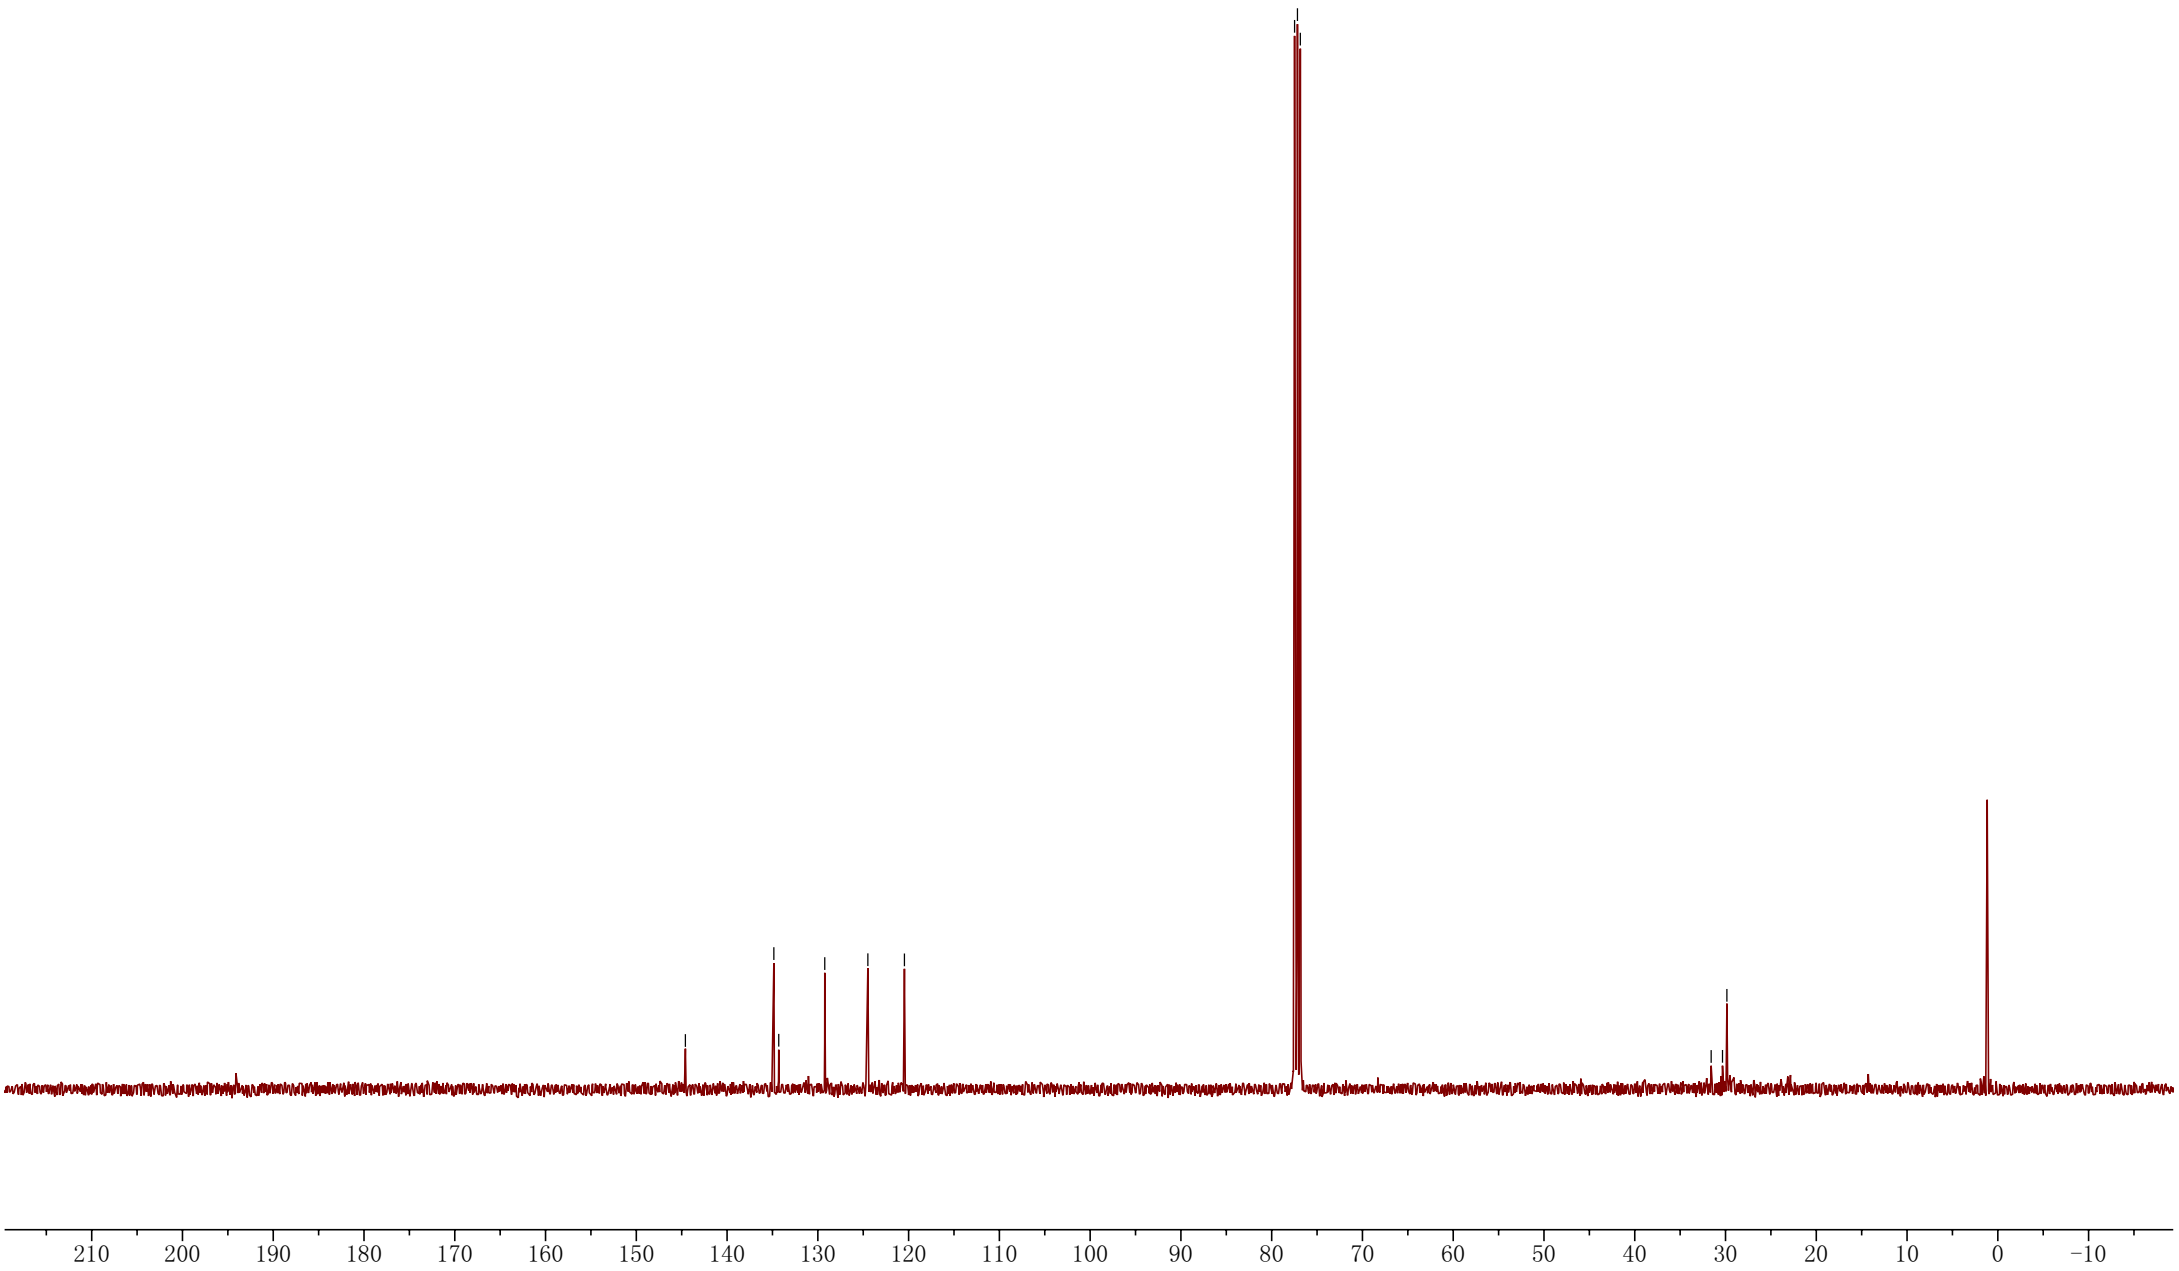



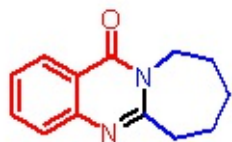

4x

<sup>1</sup>H NMR (400 MHz, CDCl<sub>3</sub>)

8.266  
8.262  
8.246  
8.242  
7.733  
7.729  
7.716  
7.712  
7.709  
7.695  
7.691  
7.622  
7.602  
7.456  
7.453  
7.438  
7.435  
7.260

4.406  
4.393  
4.383

3.090  
3.079  
3.064

1.888  
1.866  
1.855  
1.838  
1.827  
1.810

8.266  
8.262  
8.246  
8.242  
7.733  
7.729  
7.716  
7.712  
7.709  
7.695  
7.691  
7.622  
7.602  
7.456  
7.453  
7.438  
7.435  
7.433  
7.418  
7.415

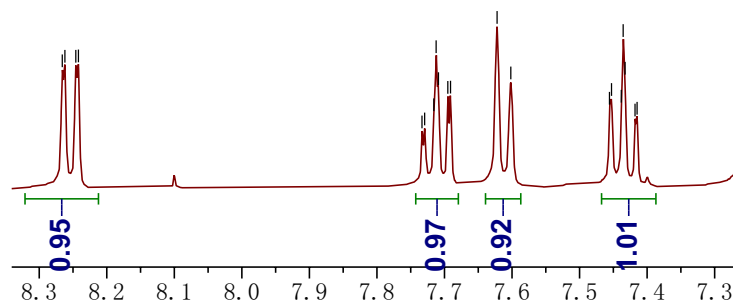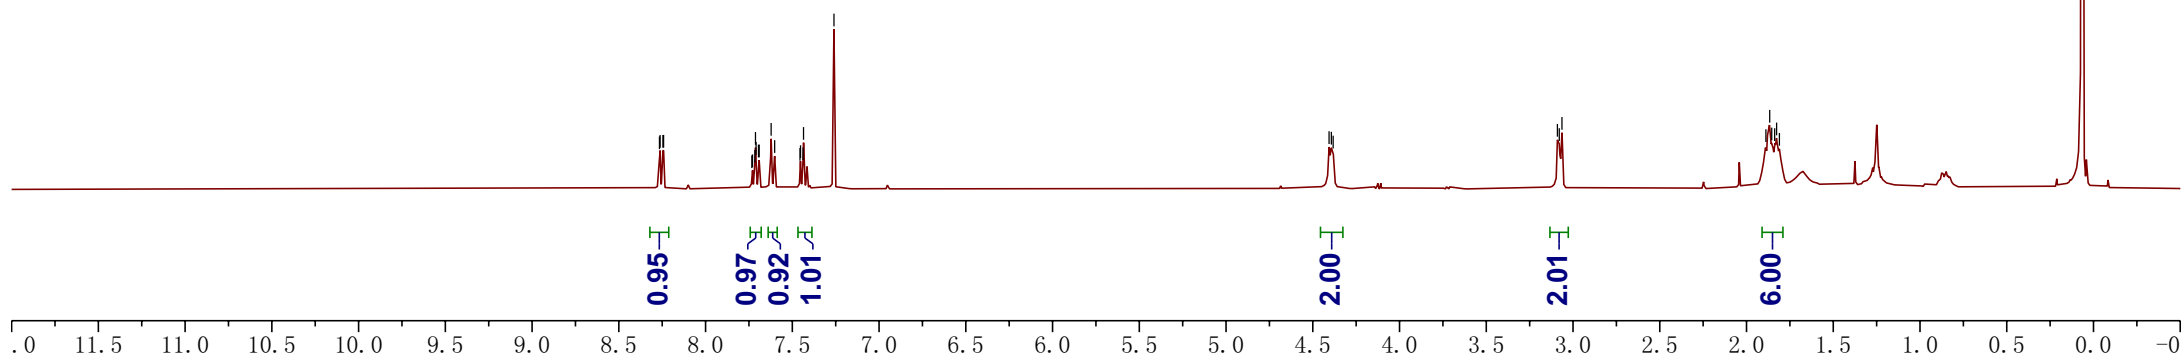

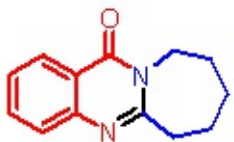

4x

$^{13}\text{C}$  NMR (100 MHz,  $\text{CDCl}_3$ )

~162.06  
~159.99

~134.37  
~127.20  
~126.80  
~126.61  
~120.34

77.48  
77.16  
76.84

~43.08  
~37.79  
~29.72  
~28.22  
~25.55

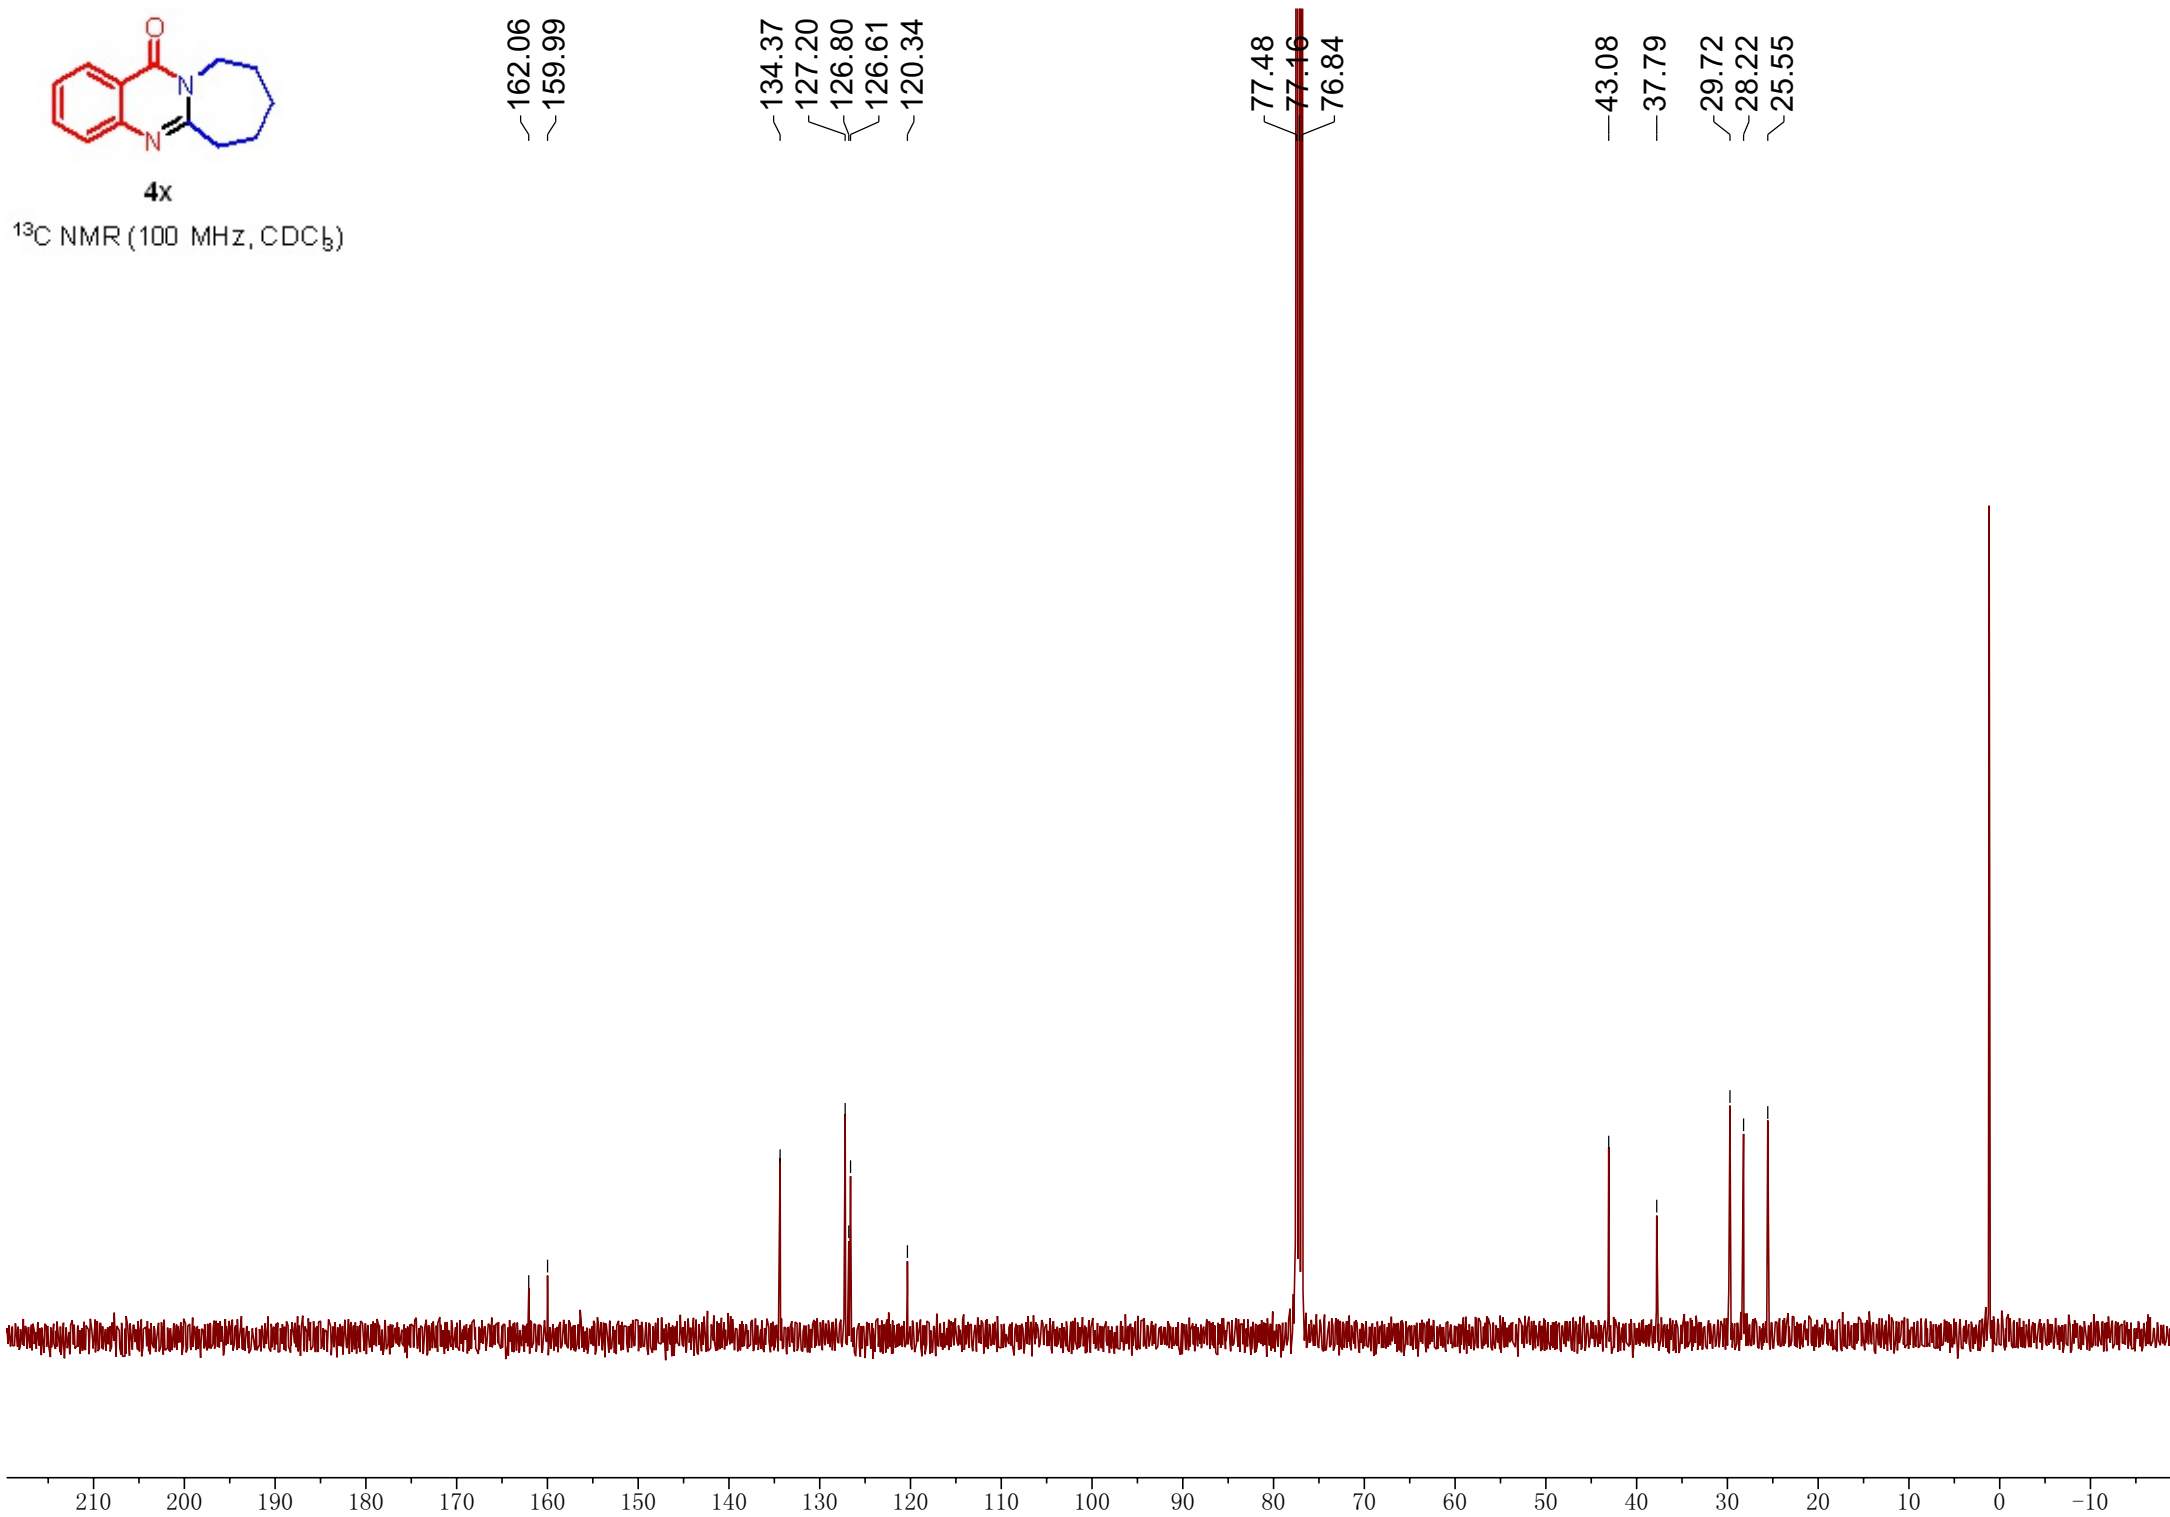

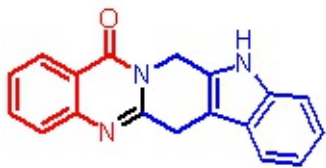

—9.592

<sup>1</sup>H NMR (400 MHz, CDCl<sub>3</sub>)

8.336  
8.333  
8.316  
8.313  
7.723  
7.719  
7.705  
7.702  
7.699  
7.685  
7.681  
7.655  
7.638  
7.619  
7.444  
7.441  
7.427  
7.424  
7.421  
7.407  
7.404  
7.373  
7.353  
7.326  
7.309  
7.288  
7.260  
7.193  
7.174  
7.156  
4.609  
4.592  
4.574  
3.251  
3.234  
3.217

8.336  
8.333  
8.316  
8.313  
7.705  
7.702  
7.685  
7.681  
7.655  
7.638  
7.619  
7.427  
7.424  
7.421  
7.353  
7.326  
7.309  
7.260  
7.193  
7.174

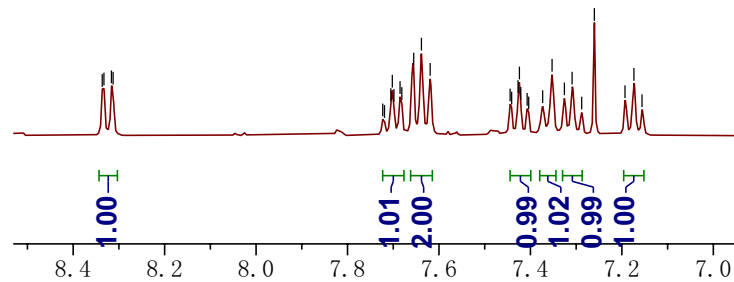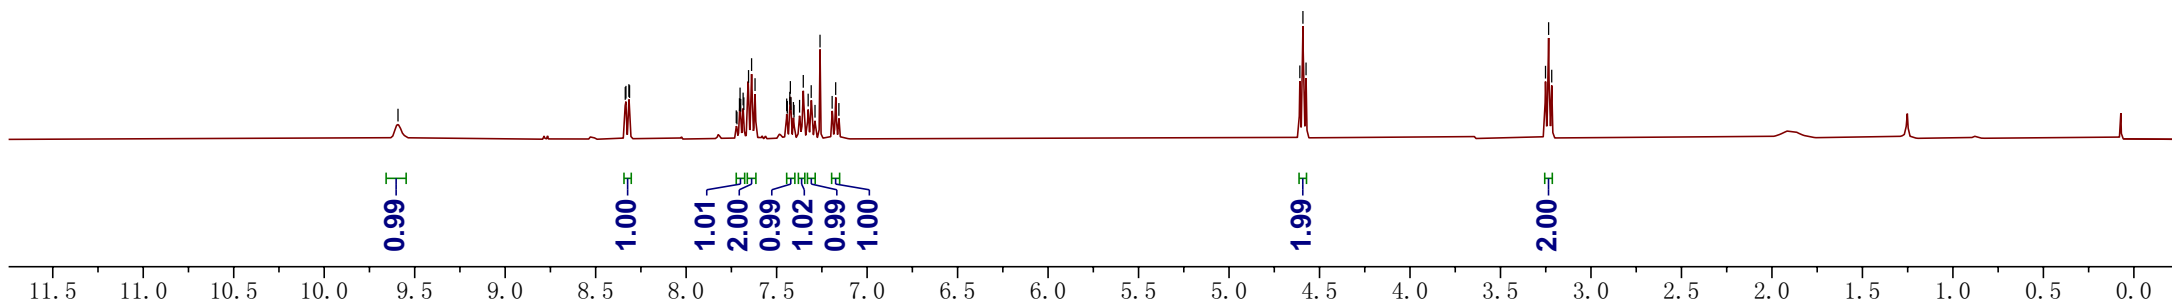

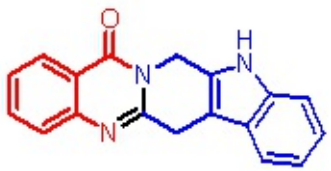

$^{13}\text{C}$  NMR (100 MHz,  $\text{CDCl}_3$ )

161.74  
147.53  
145.28  
138.49  
134.53  
127.40  
127.23  
126.62  
126.38  
125.71  
125.69  
121.26  
120.72  
120.20  
118.61  
112.27

77.48  
77.16  
76.84

41.29

19.79

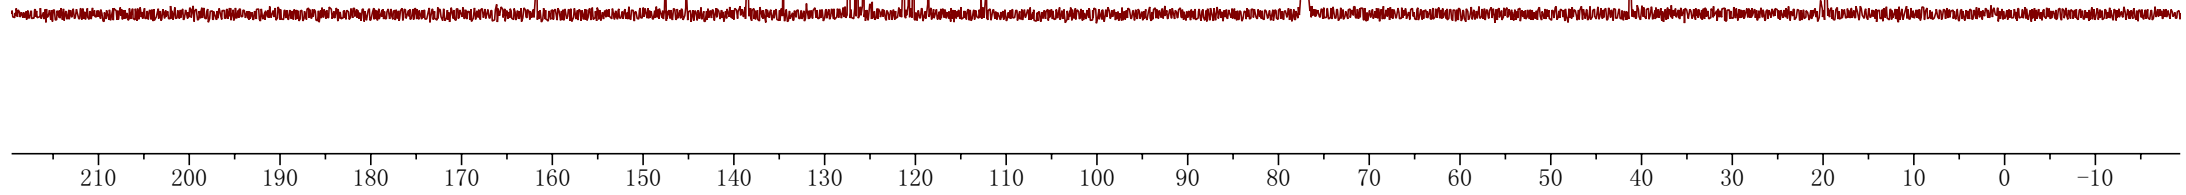

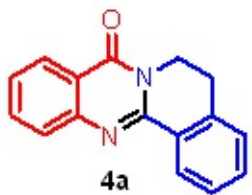

<sup>1</sup>H NMR (400 MHz, CDCl<sub>3</sub>)

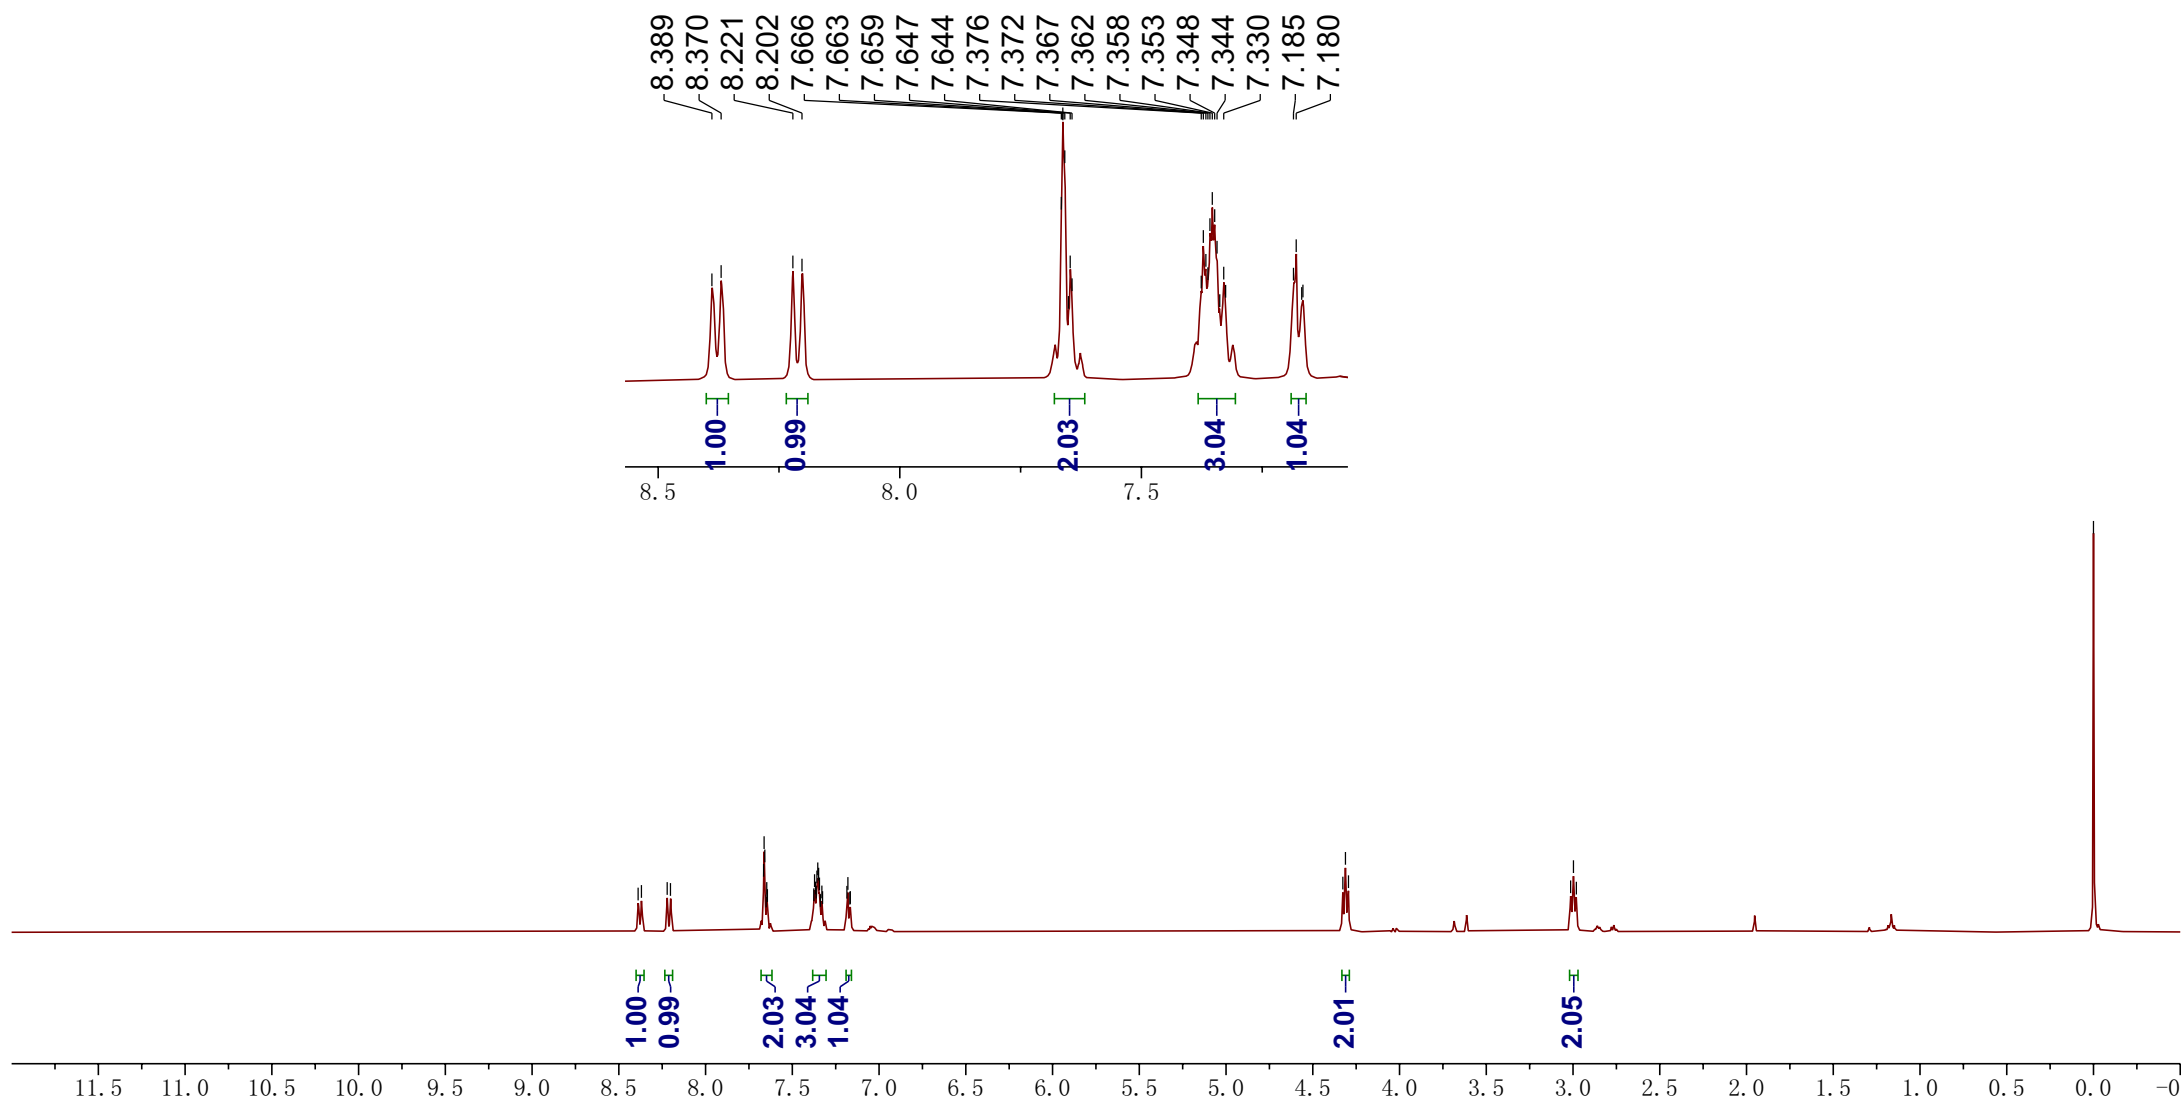

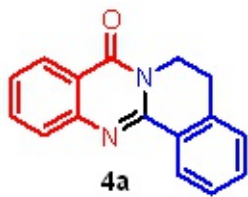

$^{13}\text{C}$  NMR (100 MHz,  $\text{CDCl}_3$ )

—160.64  
—148.29  
—146.71  
—135.99  
—133.17  
—130.65  
—128.47  
—126.93  
—126.56  
—126.53  
—126.45  
—125.79  
—125.47  
—119.66

—76.36  
—76.04  
—75.72

—38.52

—26.37

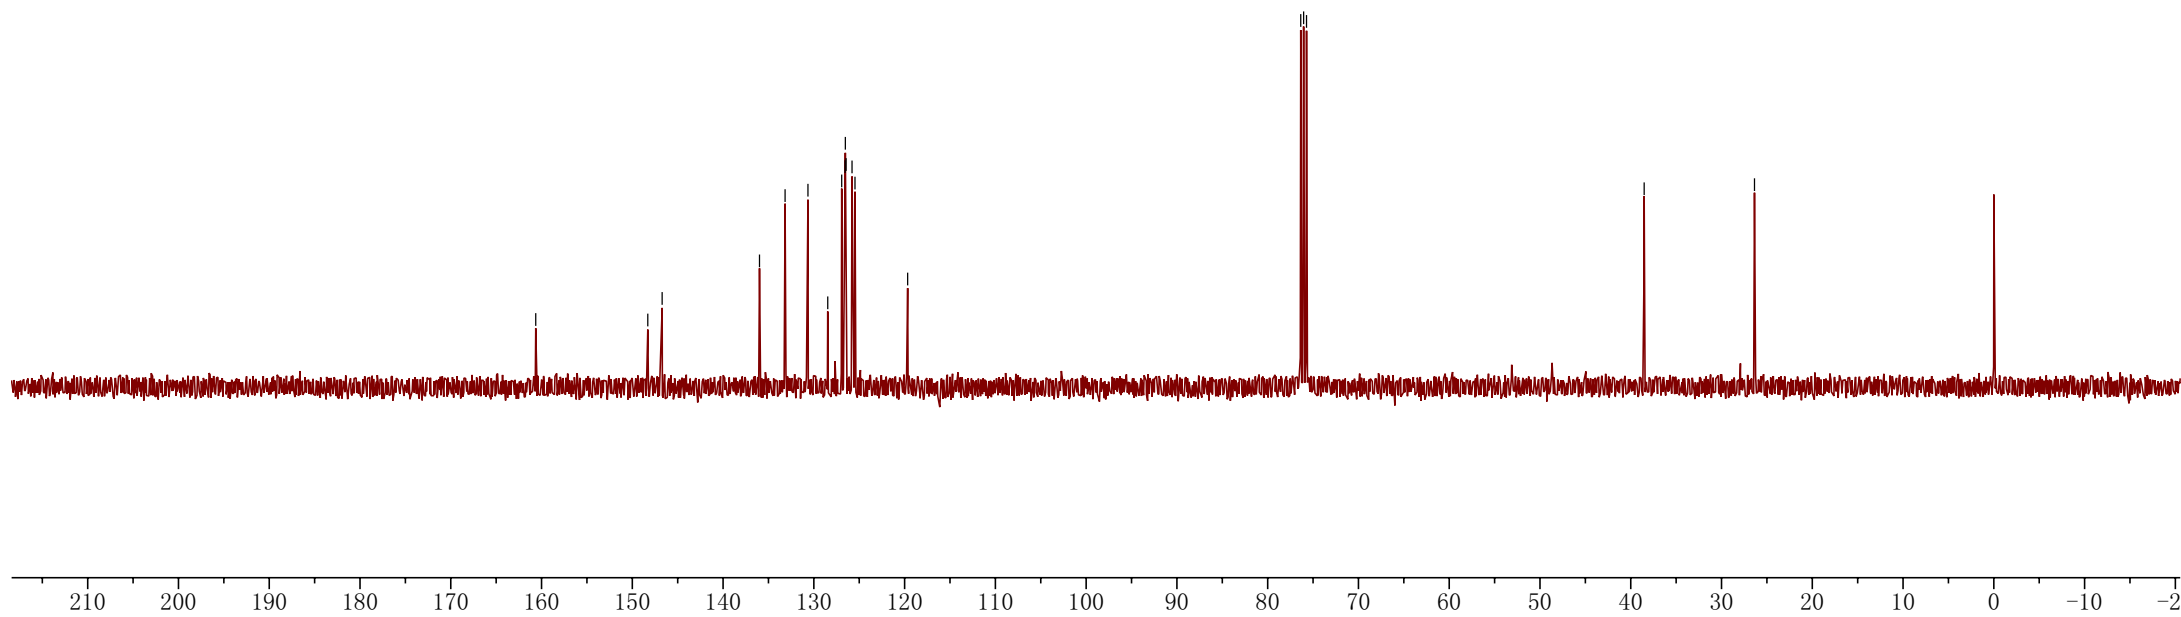

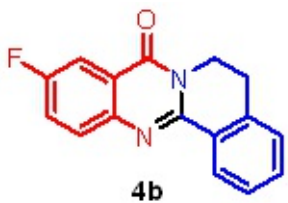

<sup>1</sup>H NMR (400 MHz, CDCl<sub>3</sub>)

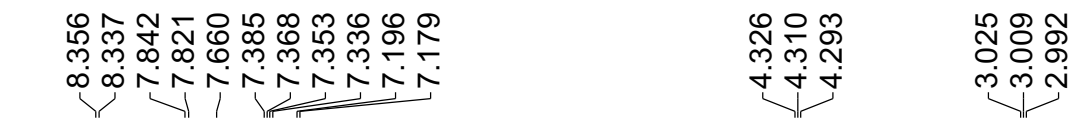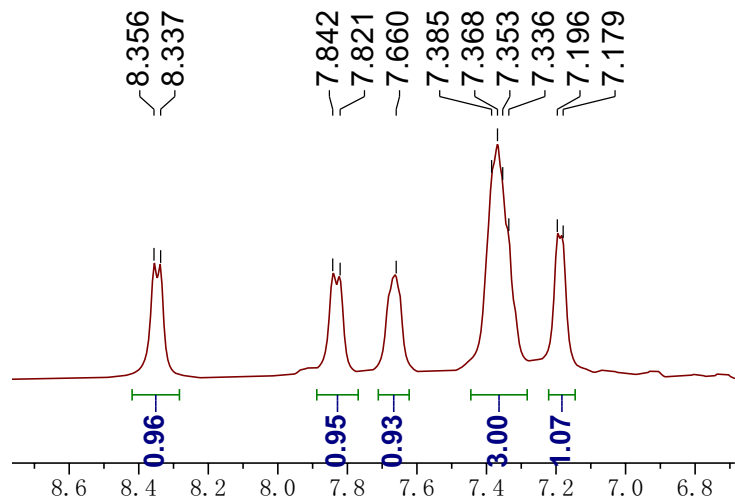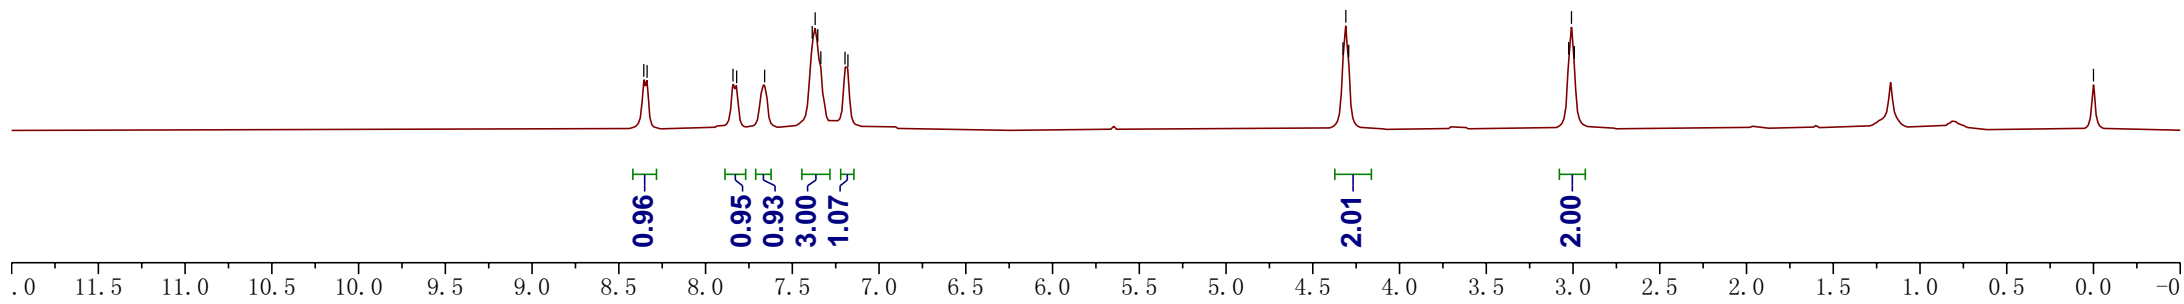

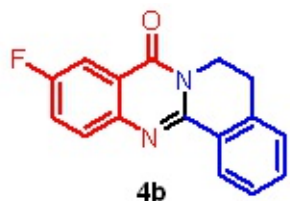

4b

$^{13}\text{C}$  NMR (100 MHz,  $\text{CDCl}_3$ )

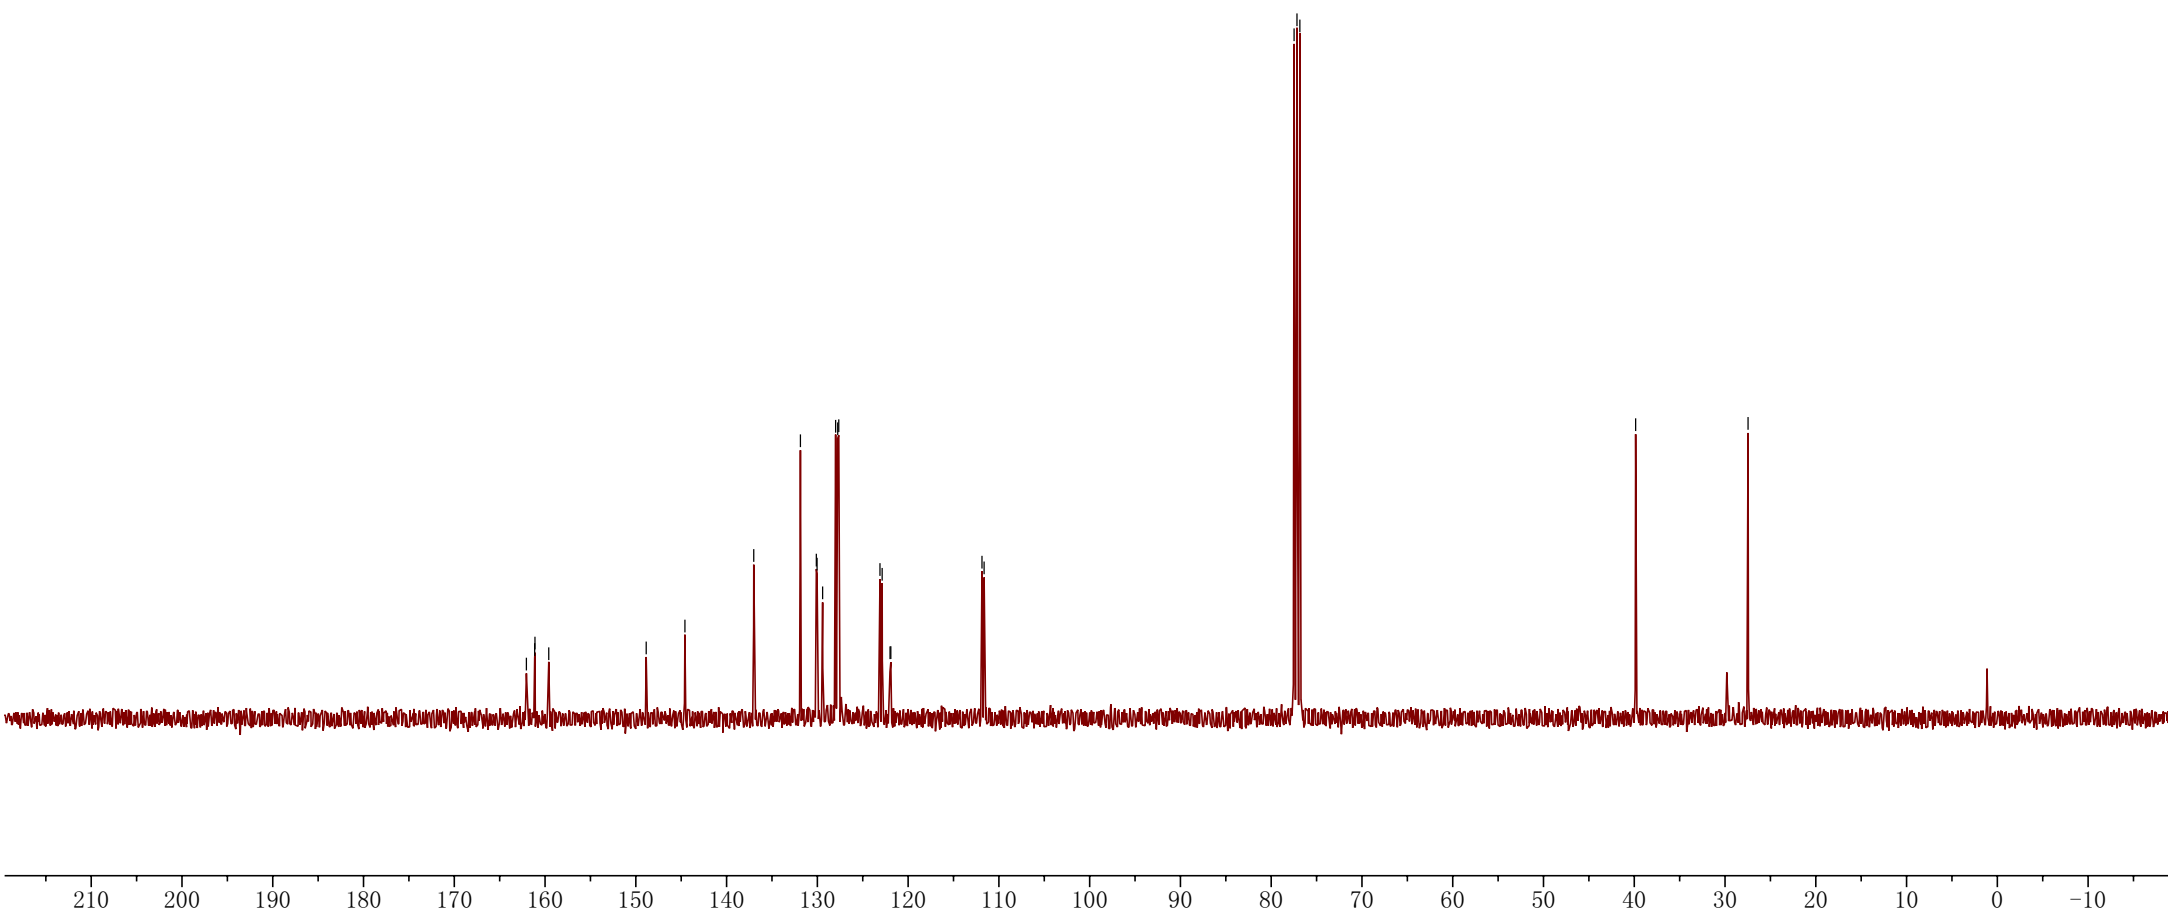



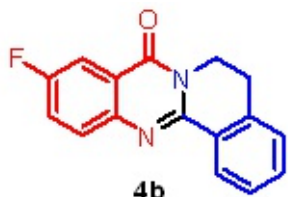

$^{19}\text{F}$  NMR (376 MHz,  $\text{CDCl}_3$ )

---112.98

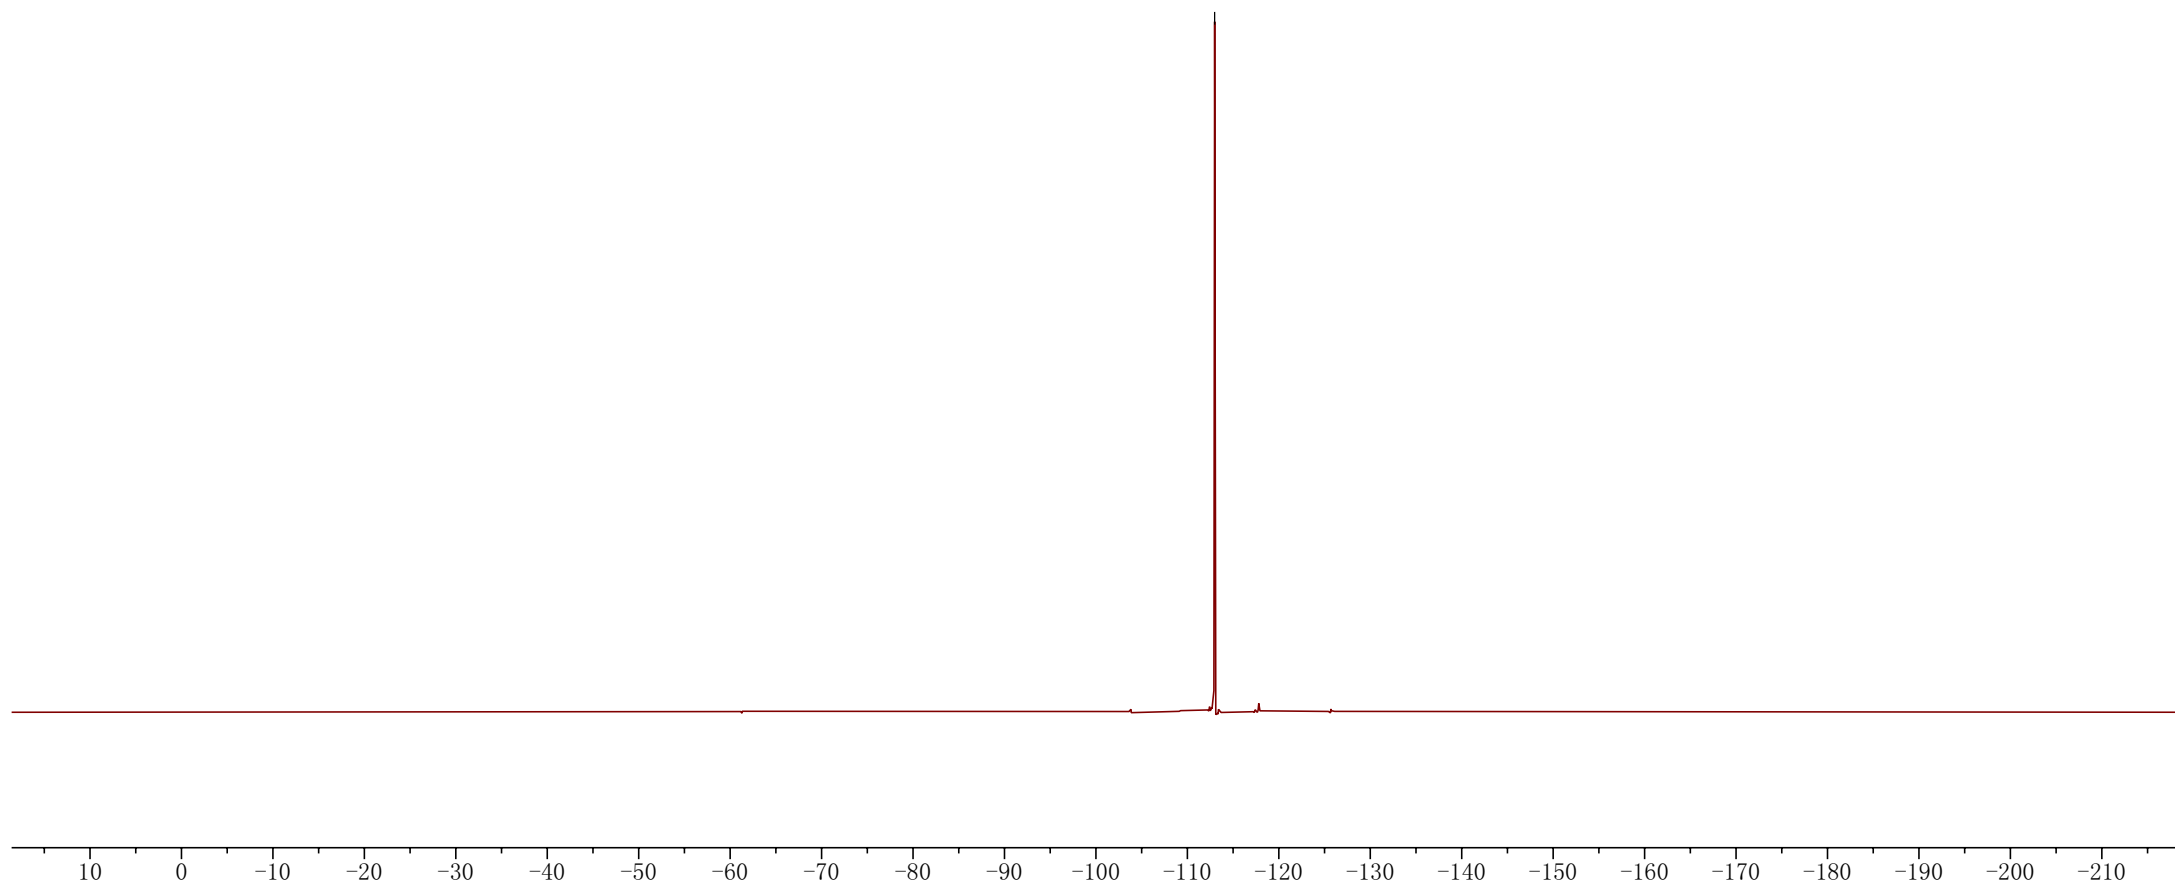

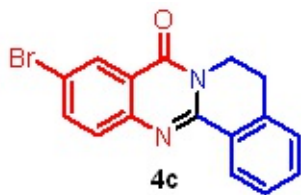

<sup>1</sup>H NMR (400 MHz, CDCl<sub>3</sub>)

8.469  
8.451  
8.441  
8.435  
7.835  
7.829  
7.813  
7.807  
7.651  
7.629  
7.517  
7.499  
7.481  
7.460  
7.441  
7.422  
7.260

4.425  
4.409  
4.393

3.126  
3.110  
3.093

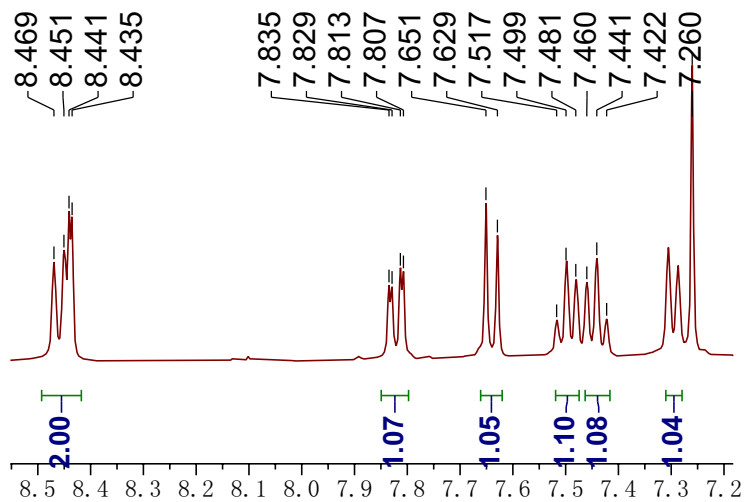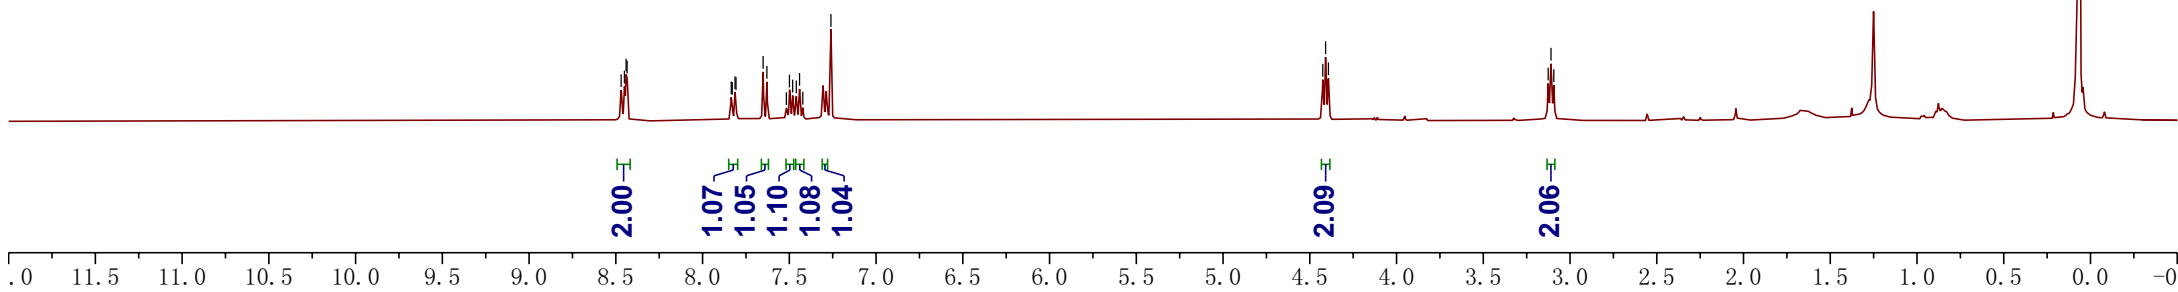

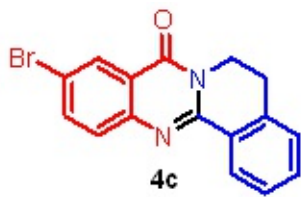

$^{13}\text{C}$  NMR (100 MHz,  $\text{CDCl}_3$ )

— 160.75  
— 149.94  
— 146.81  
137.59  
137.20  
132.16  
129.58  
129.43  
128.24  
127.88  
127.74  
122.22  
120.12

77.48  
77.16  
76.84

— 39.93

— 27.51

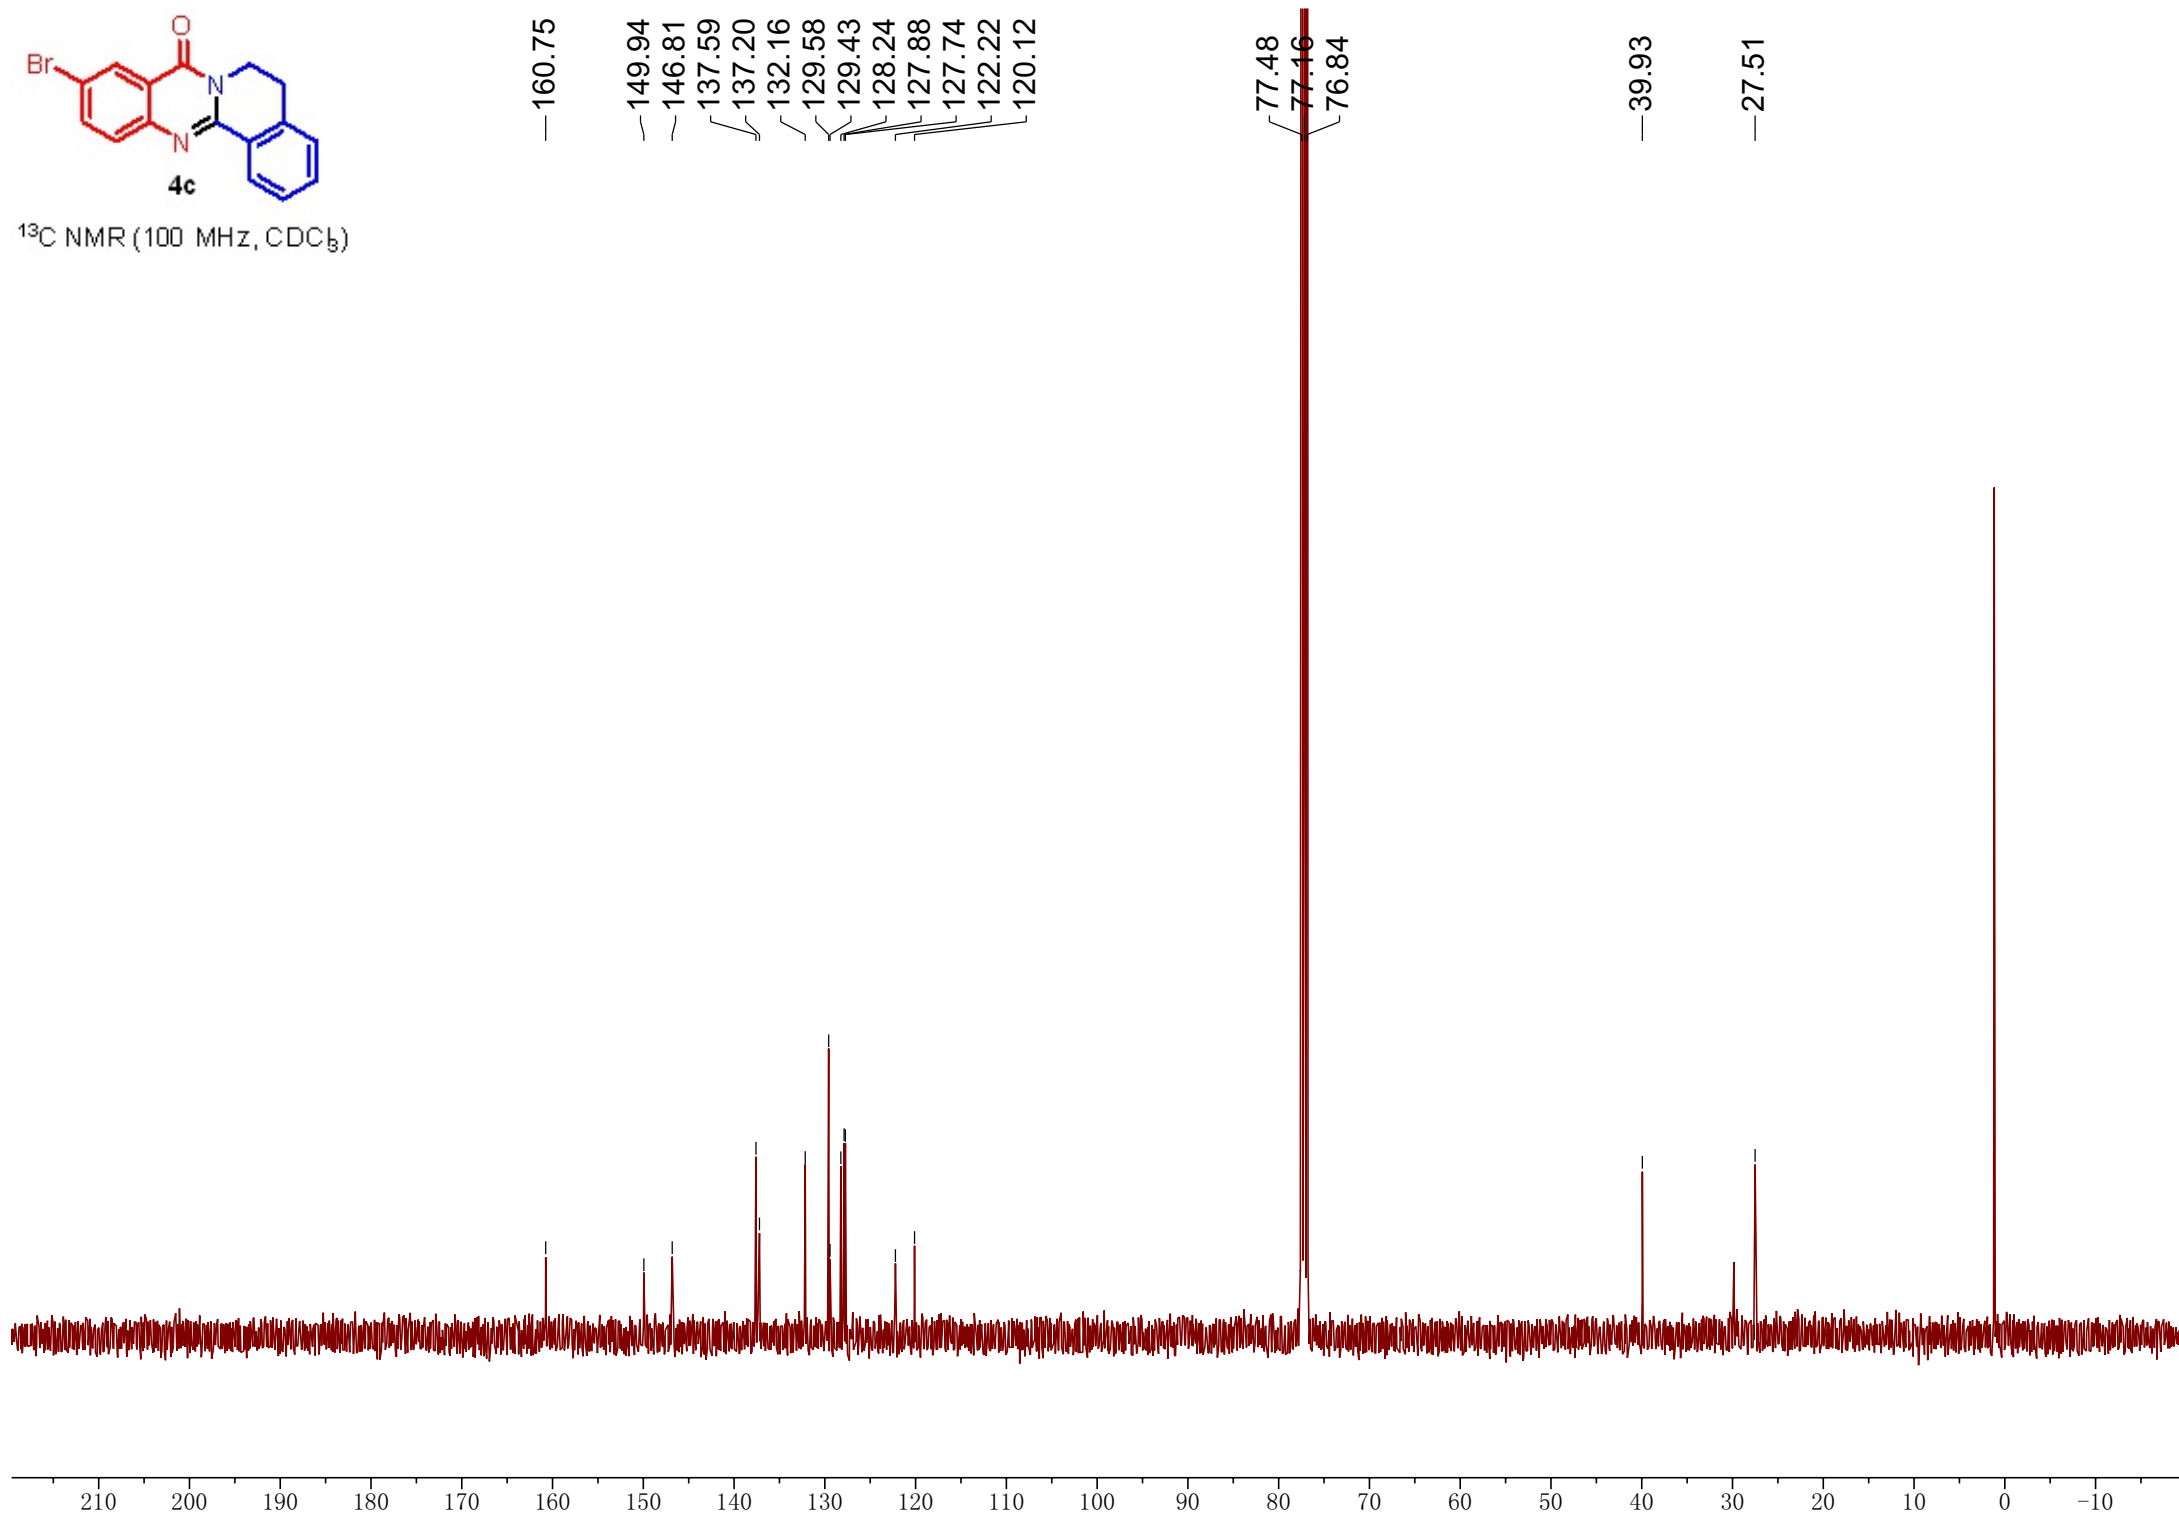

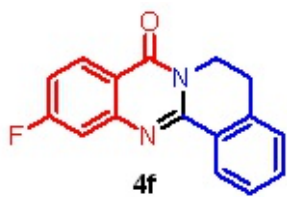

<sup>1</sup>H NMR (400 MHz, CDCl<sub>3</sub>)

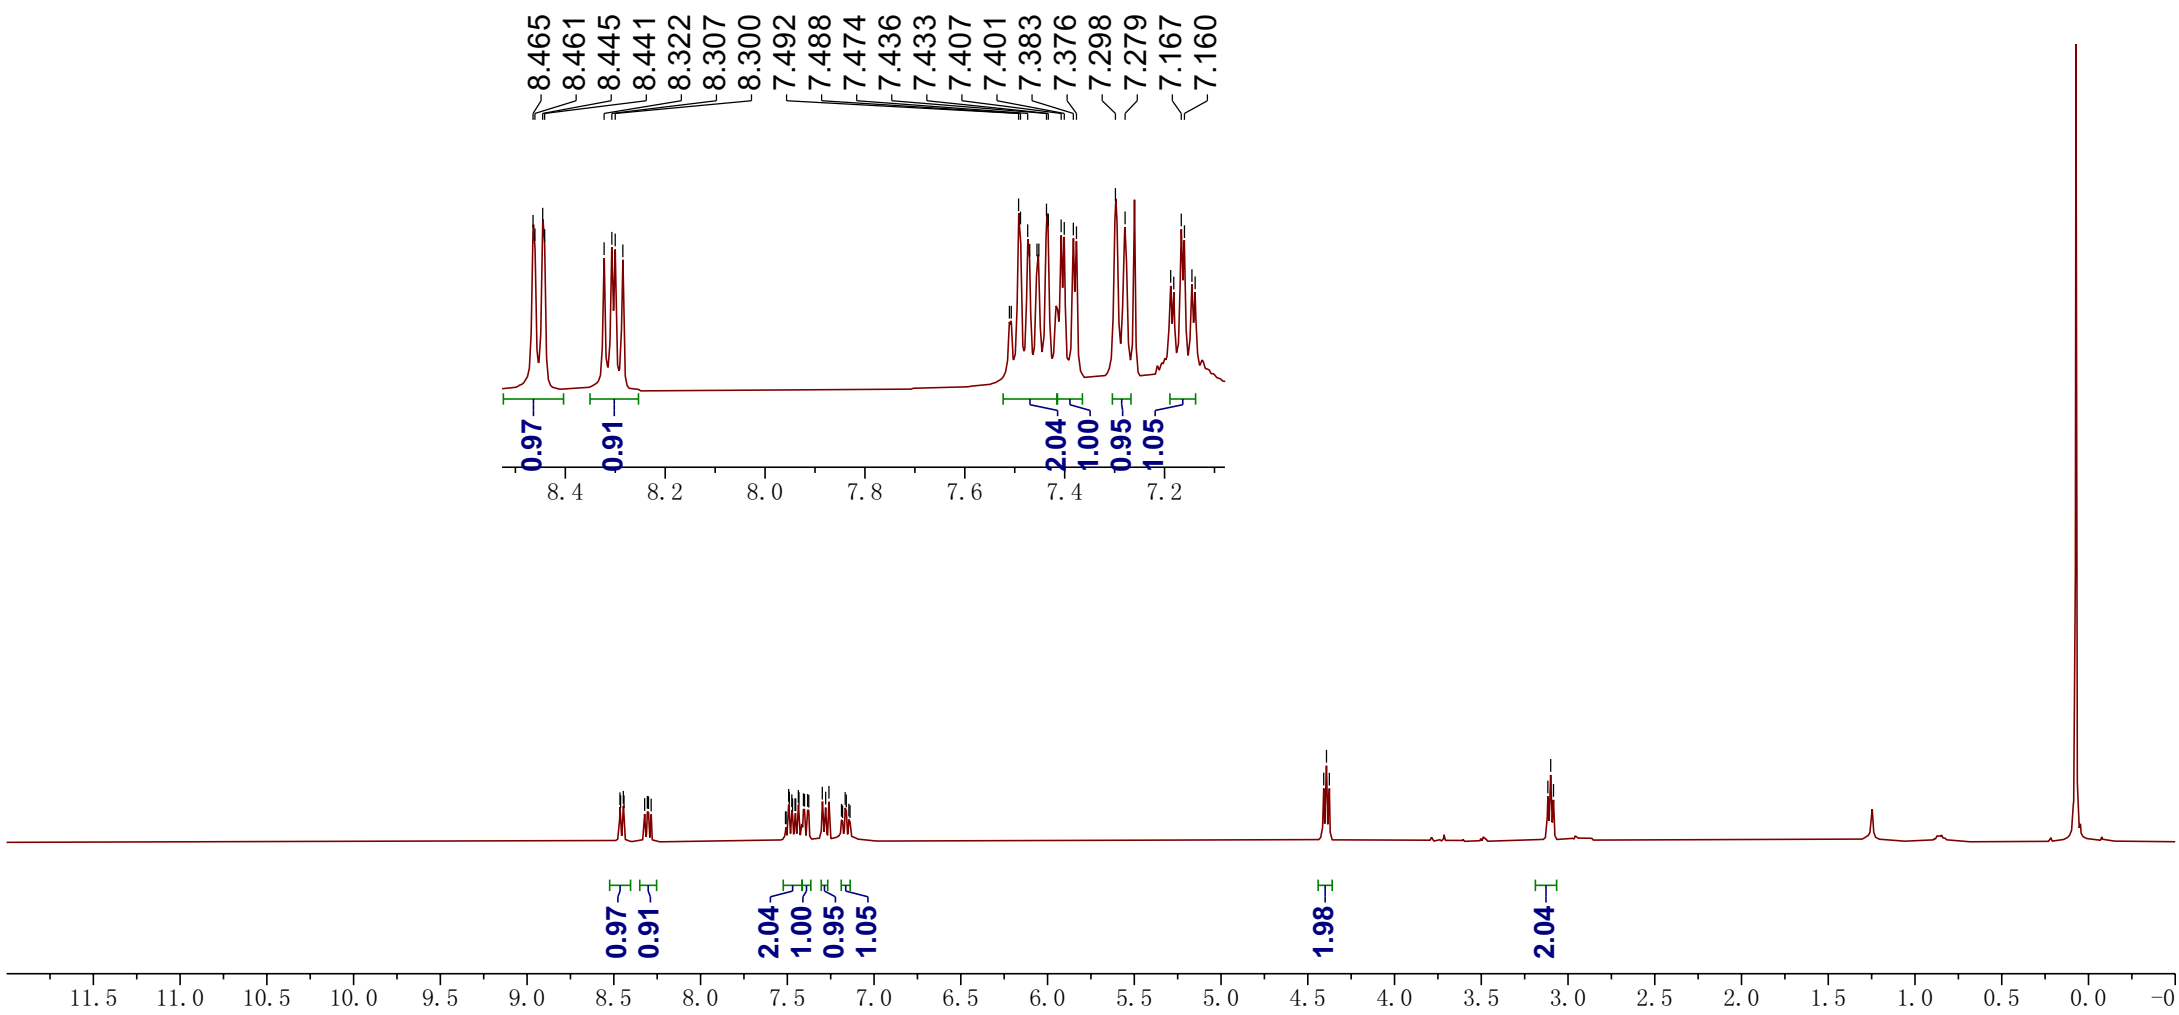

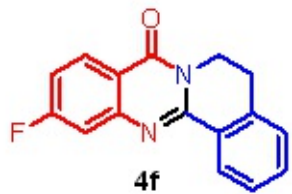

$^{13}\text{C}$  NMR (100 MHz,  $\text{CDCl}_3$ )

- 167.87
- 165.35
- 161.16
- 150.67
- 150.12
- 149.98
- 137.28
- 132.19
- 129.74
- 129.63
- 129.35
- 128.27
- 127.82
- 127.68
- 117.59
- 117.57
- 115.56
- 115.33
- 112.89
- 112.68
- 77.48
- 77.16
- 76.84
- 39.66
- 27.47

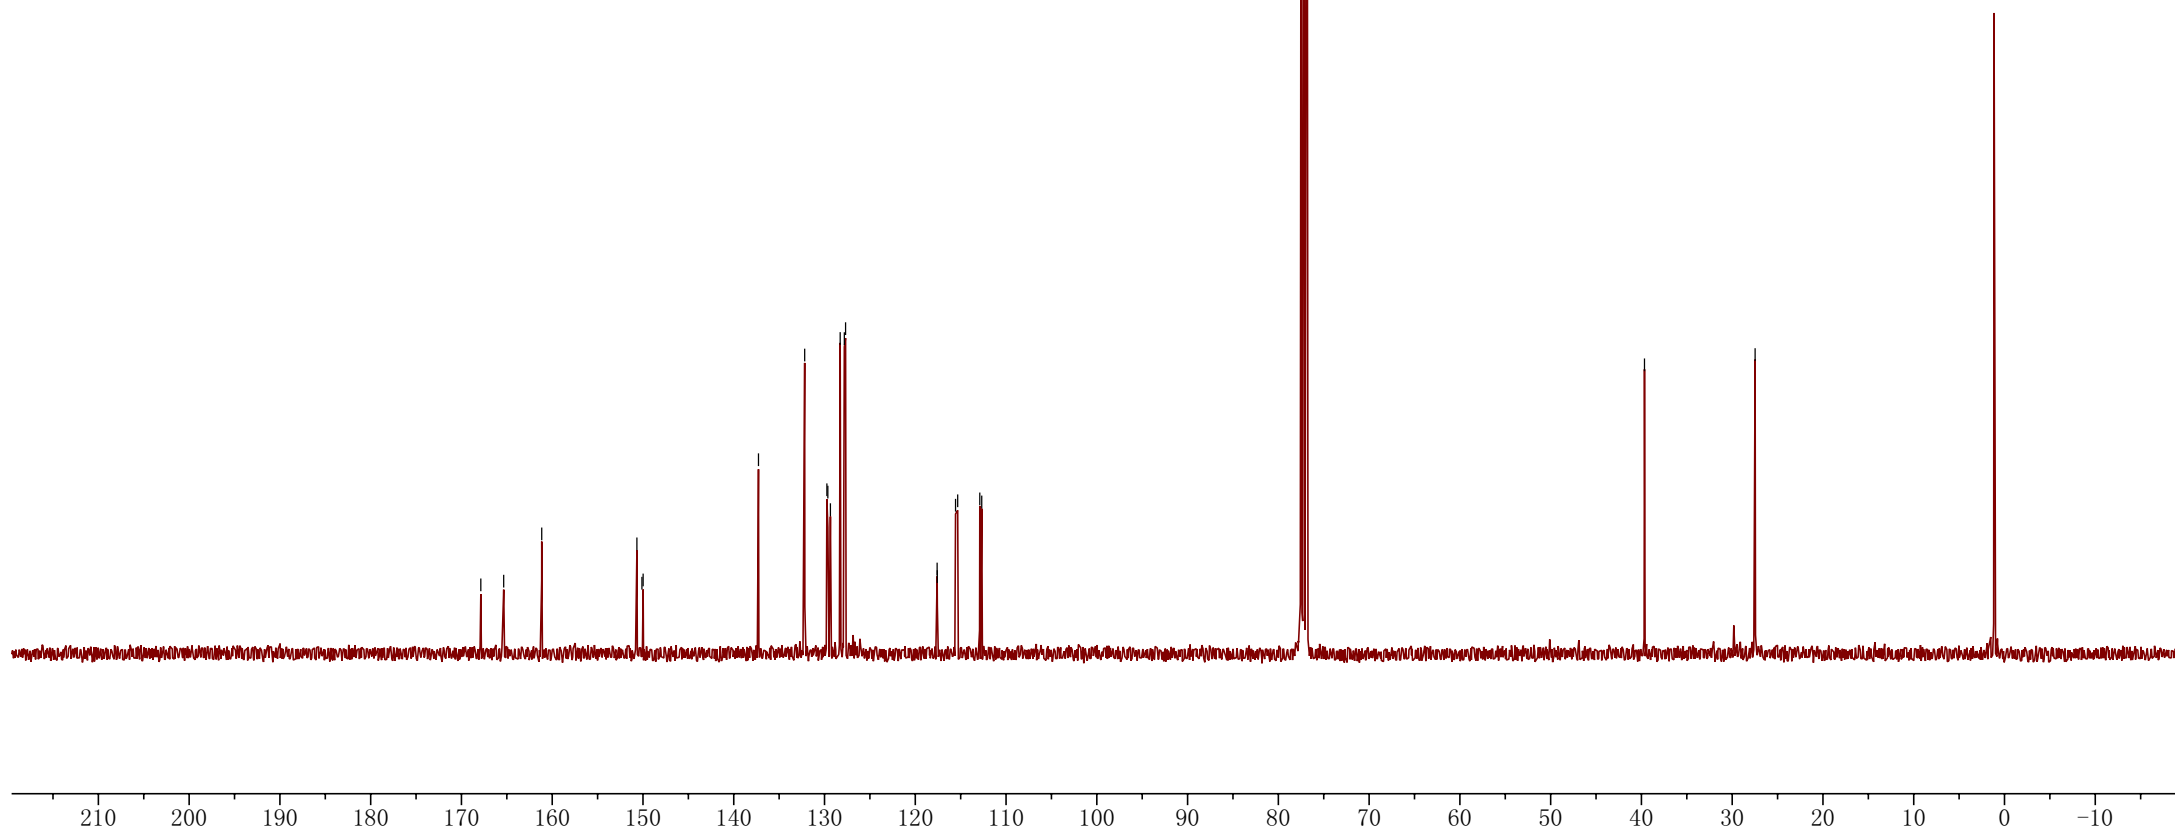

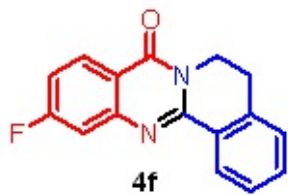

$^{19}\text{F}$  NMR (376 MHz,  $\text{CDCl}_3$ )

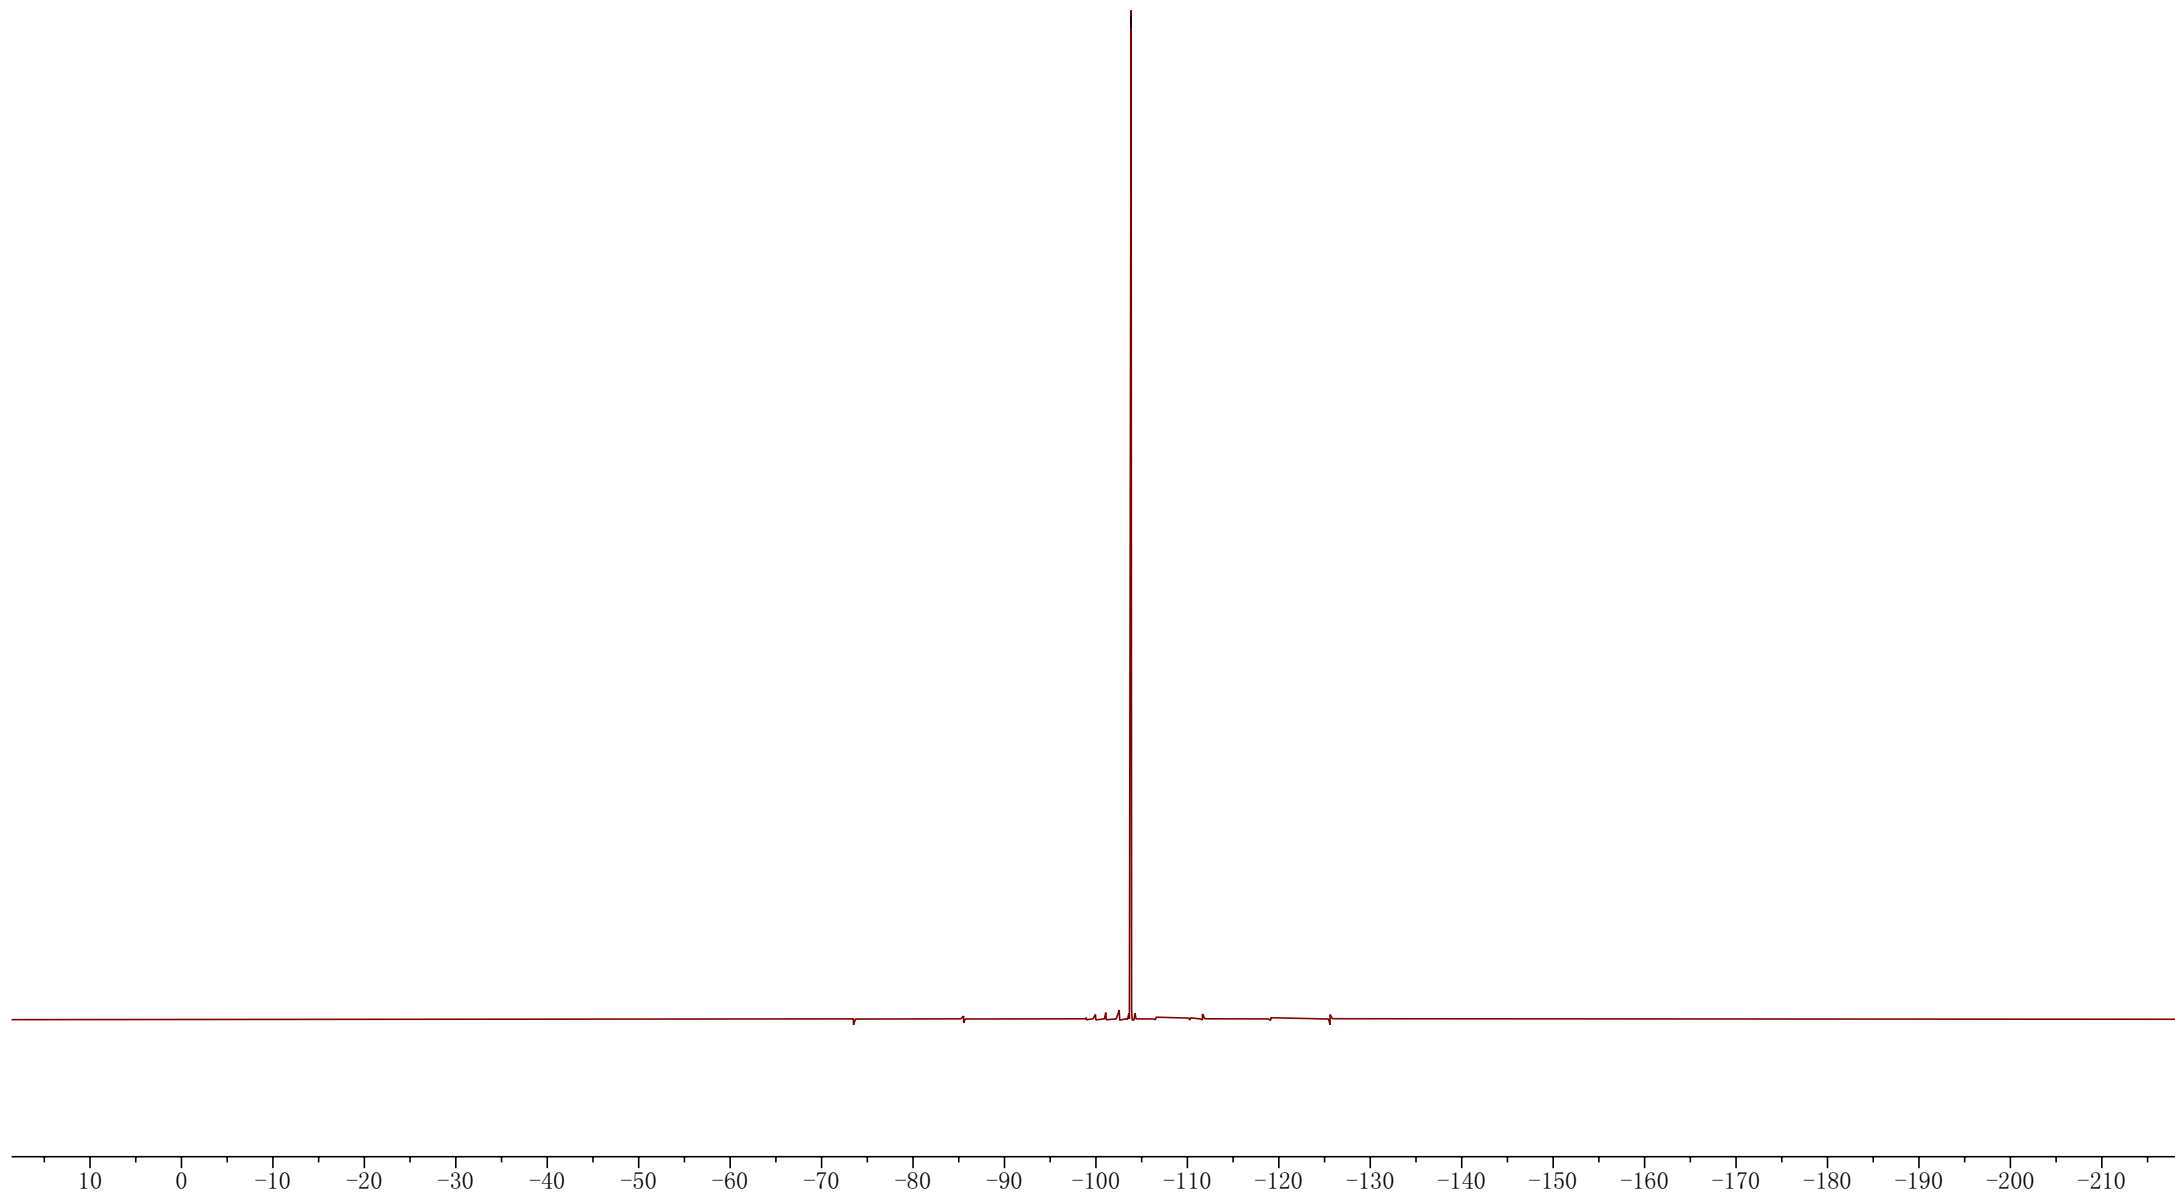

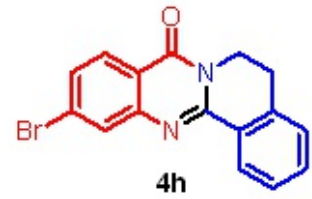

<sup>1</sup>H NMR (400 MHz, CDCl<sub>3</sub>)

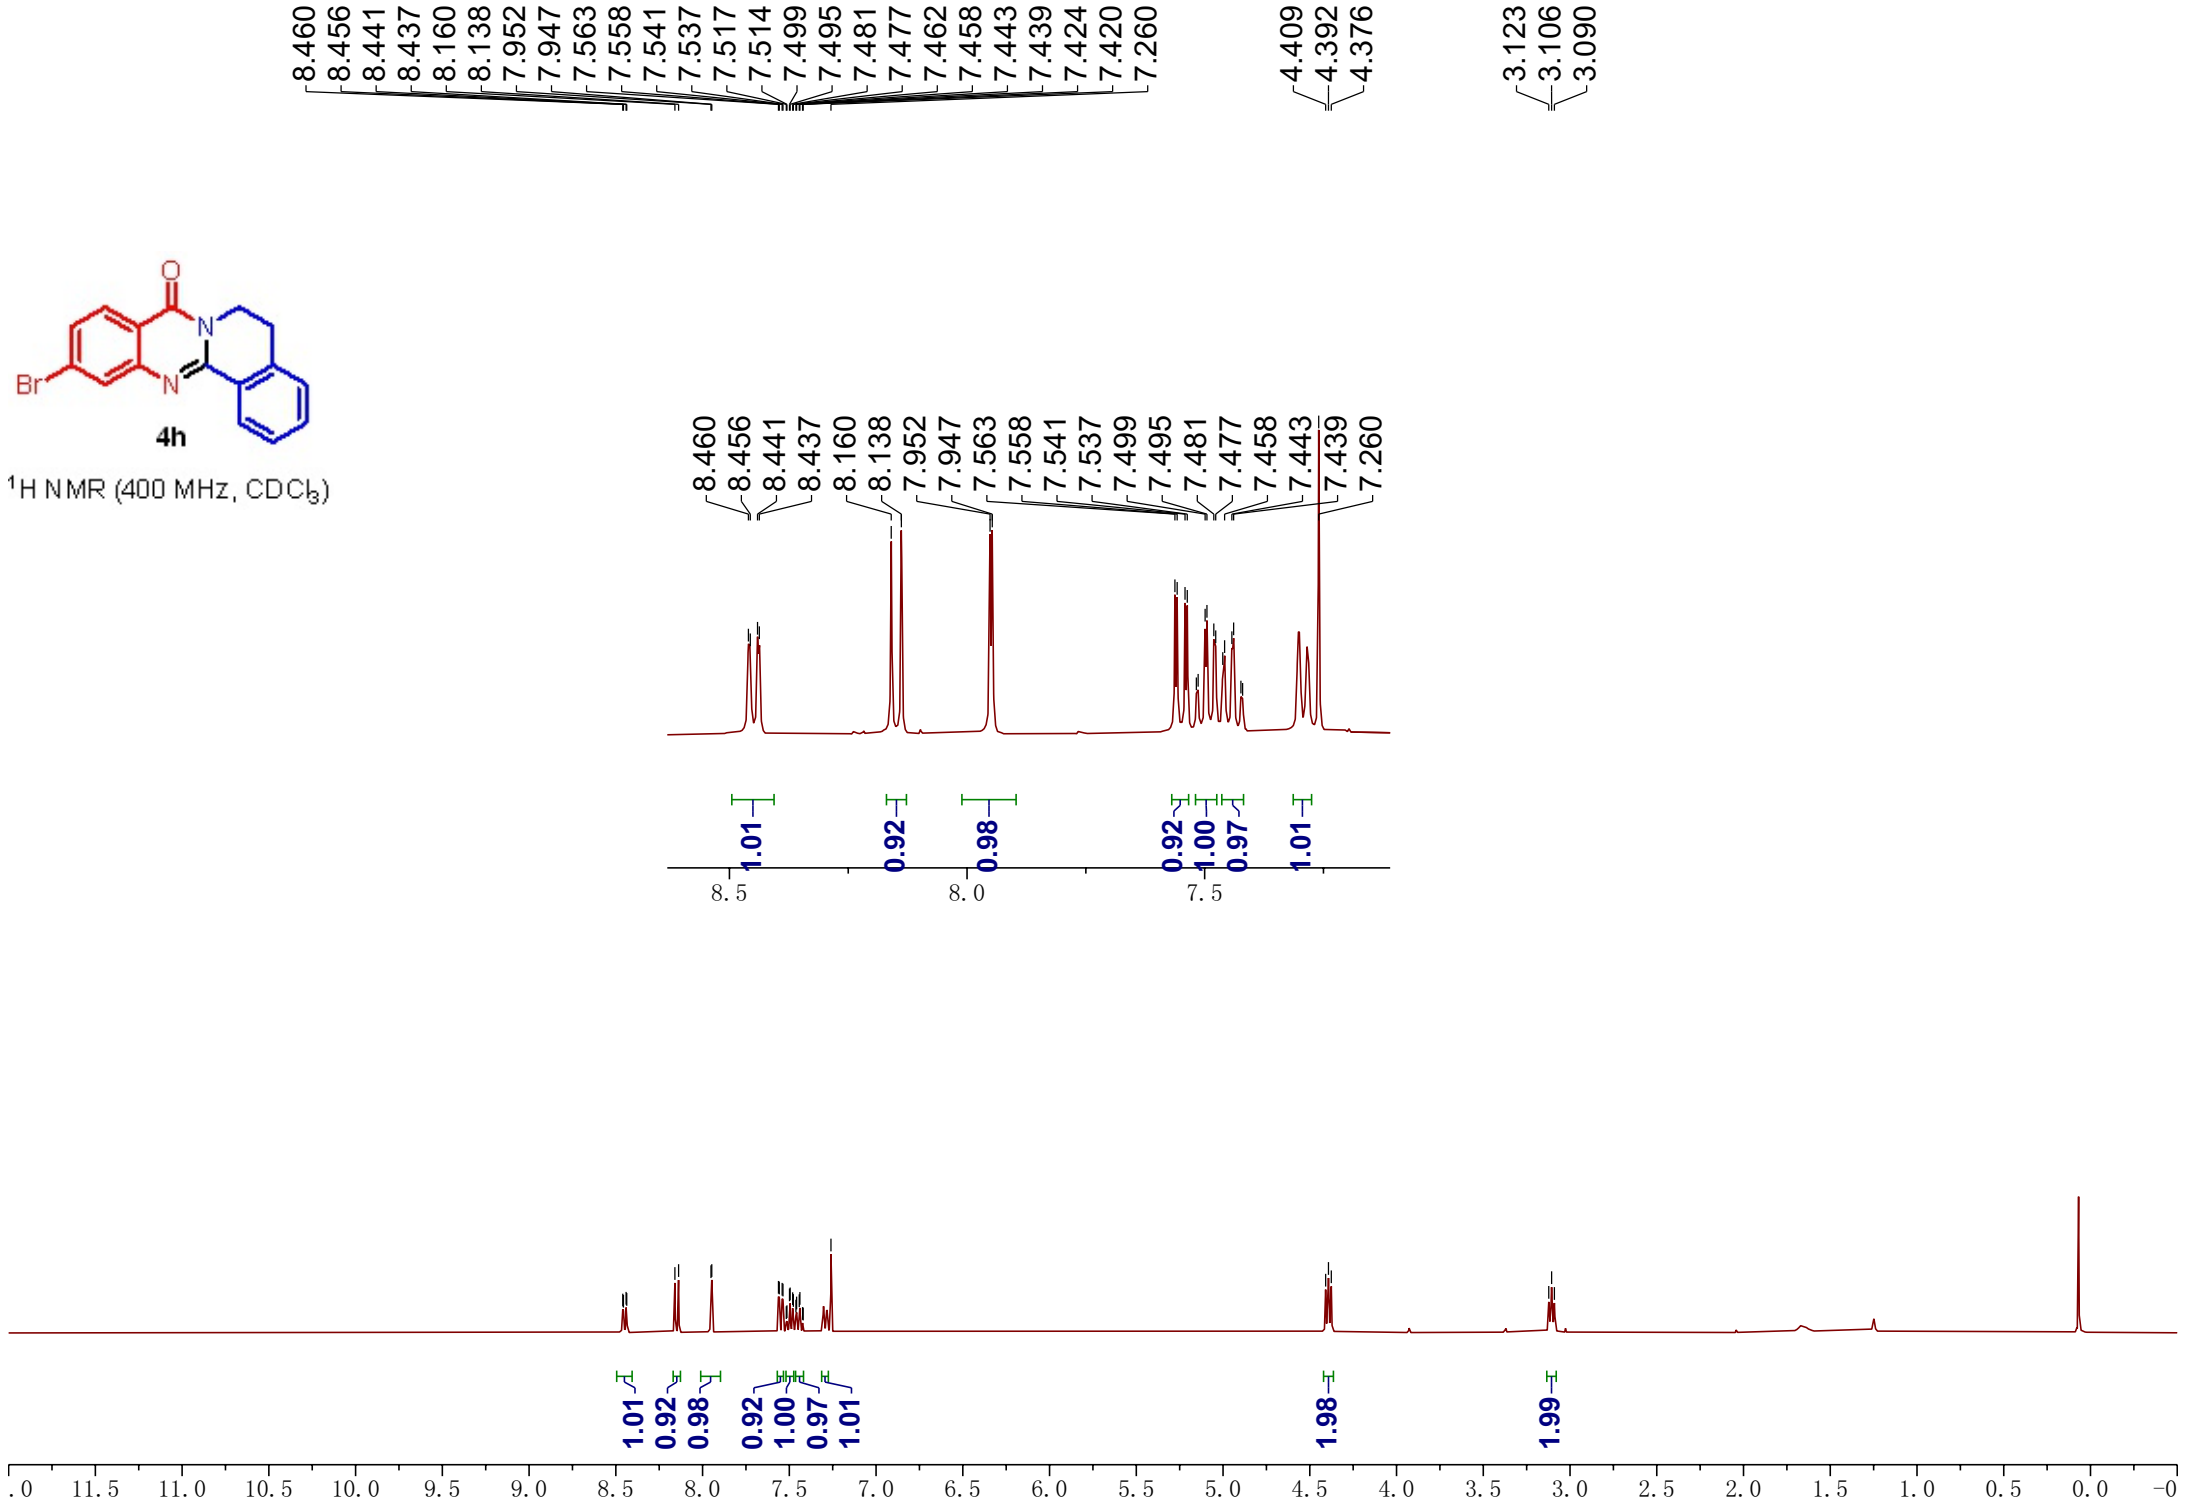

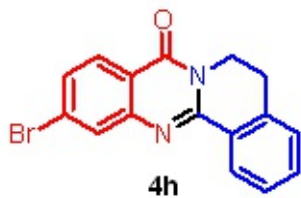

$^{13}\text{C}$  NMR (100 MHz,  $\text{CDCl}_3$ )

161.43  
150.63  
148.97  
137.25  
132.24  
130.40  
129.96  
129.35  
129.03  
128.50  
128.31  
127.86  
127.70  
119.67

77.48  
77.16  
76.84

39.79

27.46

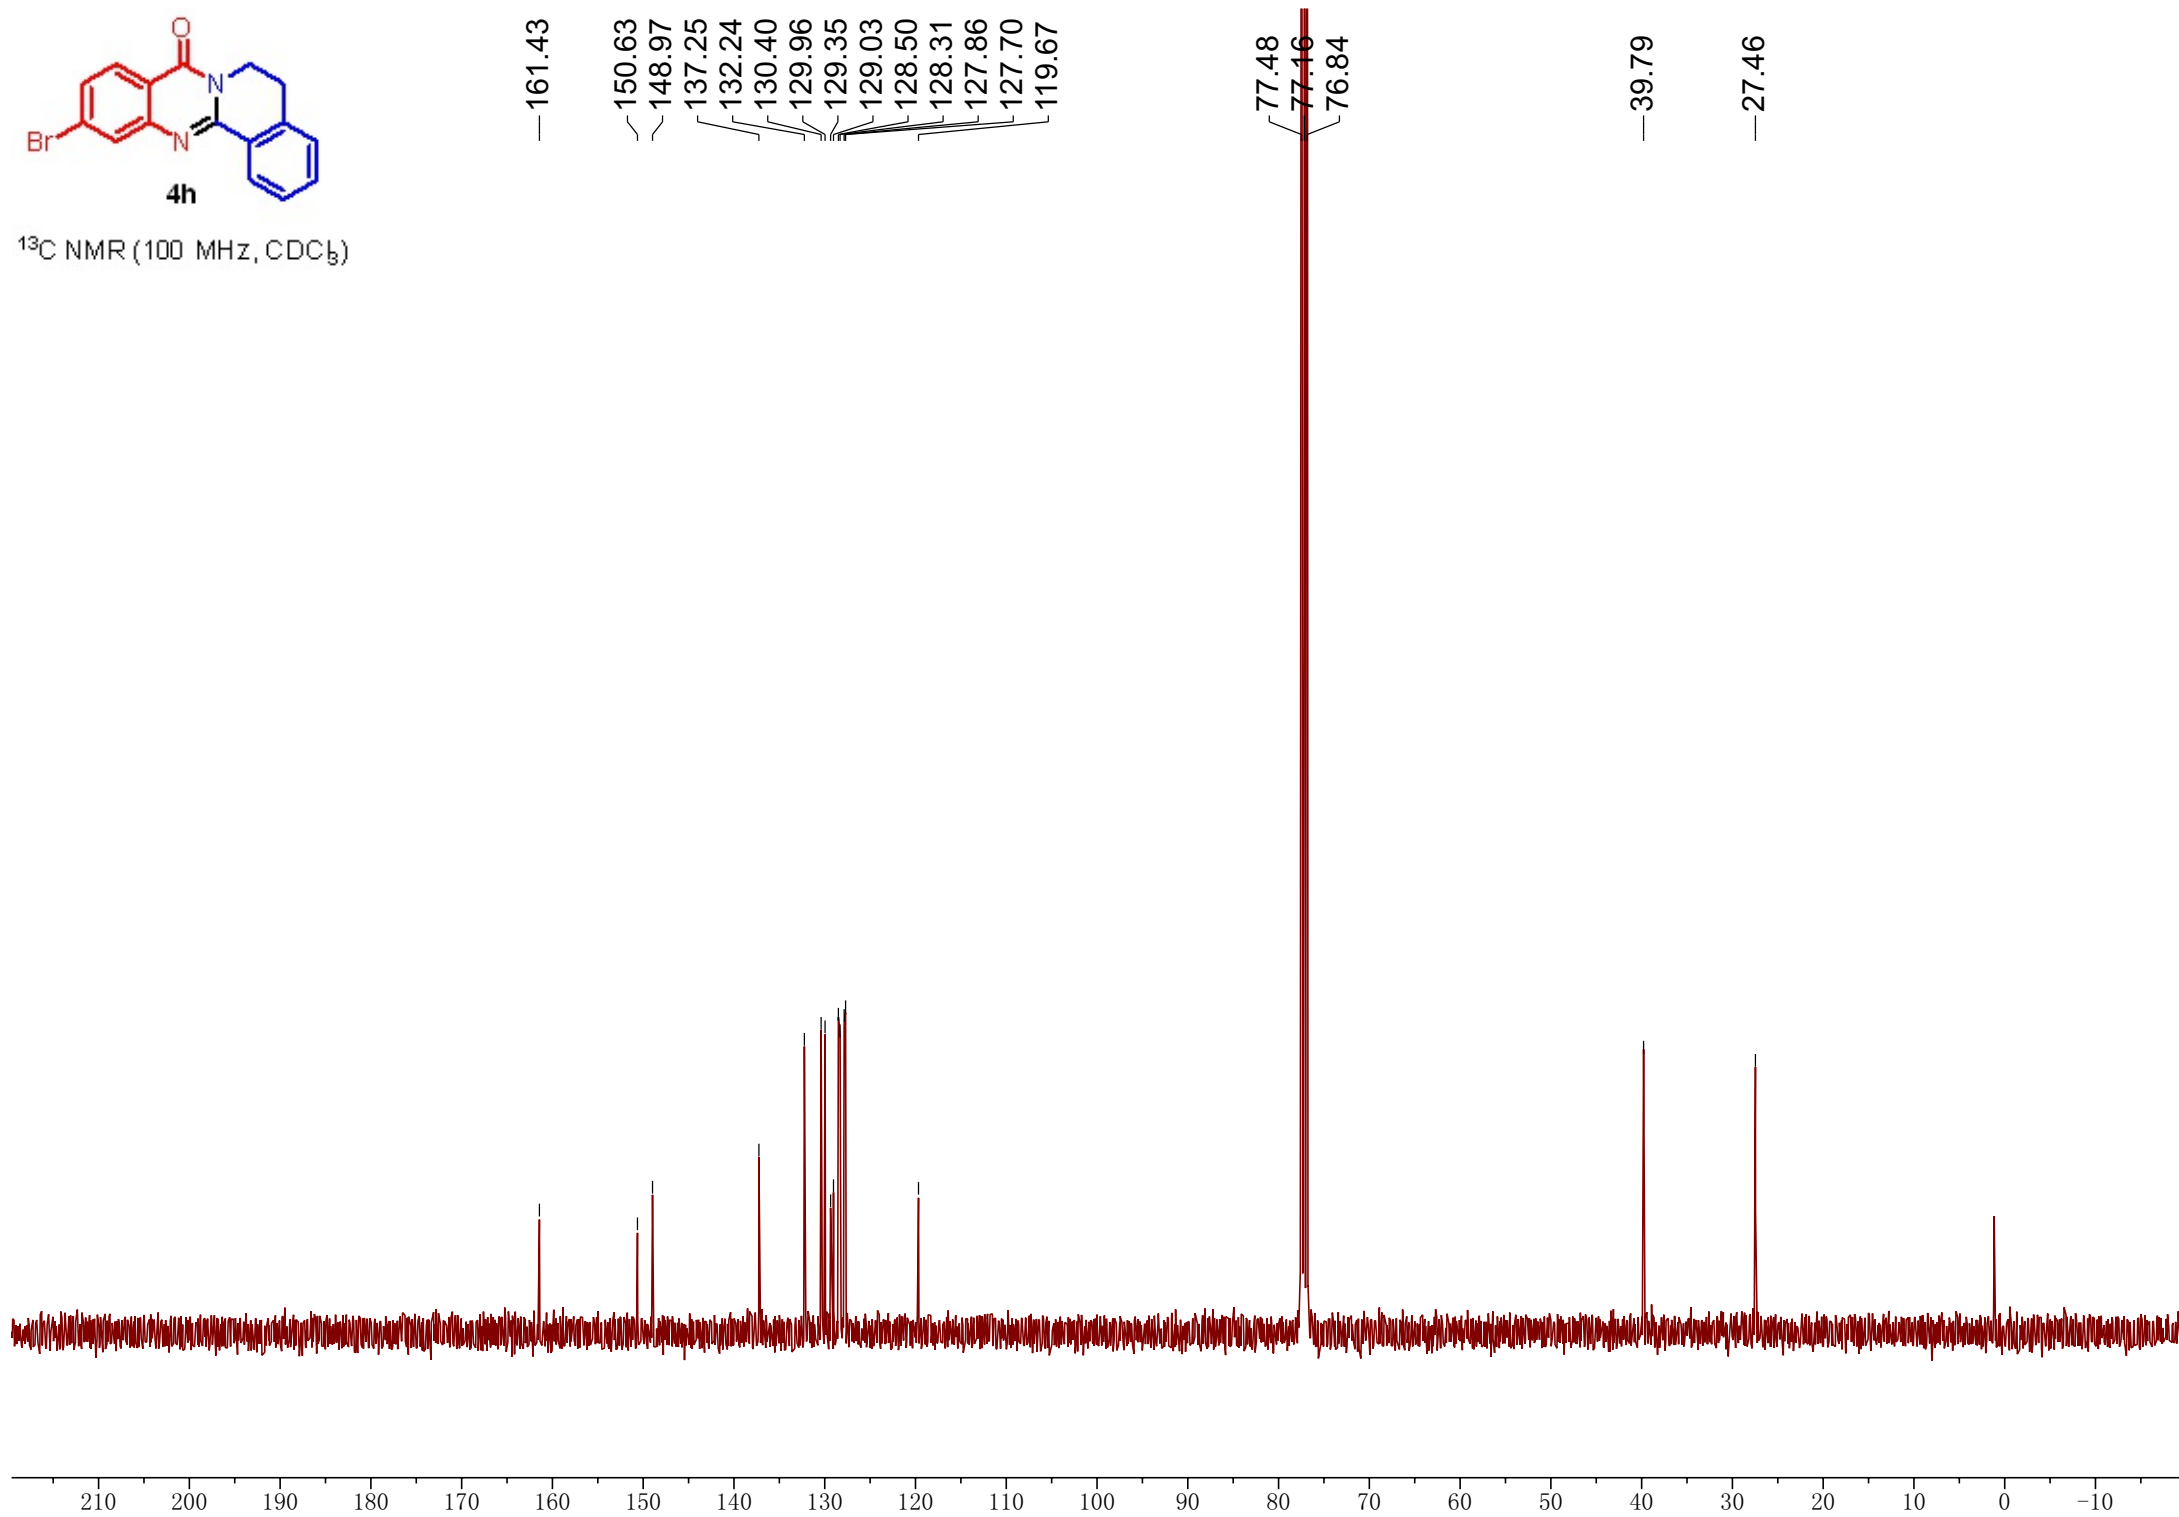



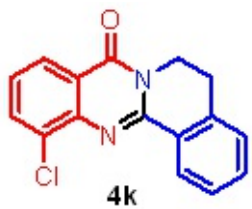

<sup>1</sup>H NMR (400 MHz, CDCl<sub>3</sub>)

8.460  
8.441  
8.263  
8.257  
7.713  
7.691  
7.680  
7.674  
7.658  
7.652  
7.507  
7.504  
7.489  
7.485  
7.471  
7.467  
7.454  
7.450  
7.435  
7.431  
7.416  
7.412  
7.298  
7.278  
7.260  
4.417  
4.401  
4.385  
3.120  
3.103  
3.087

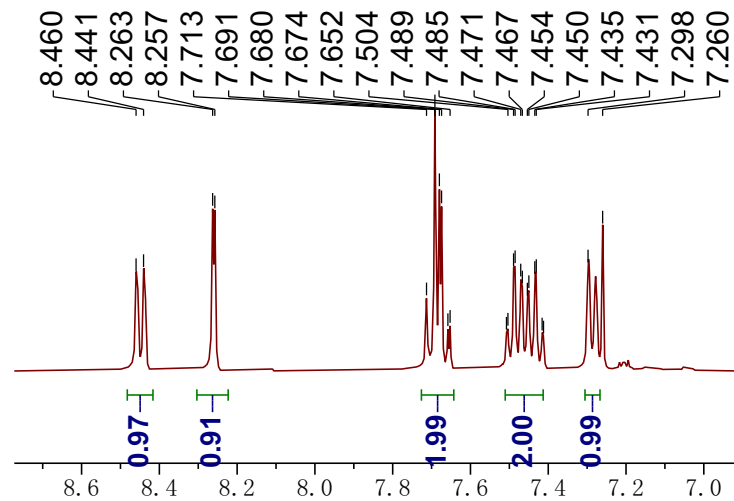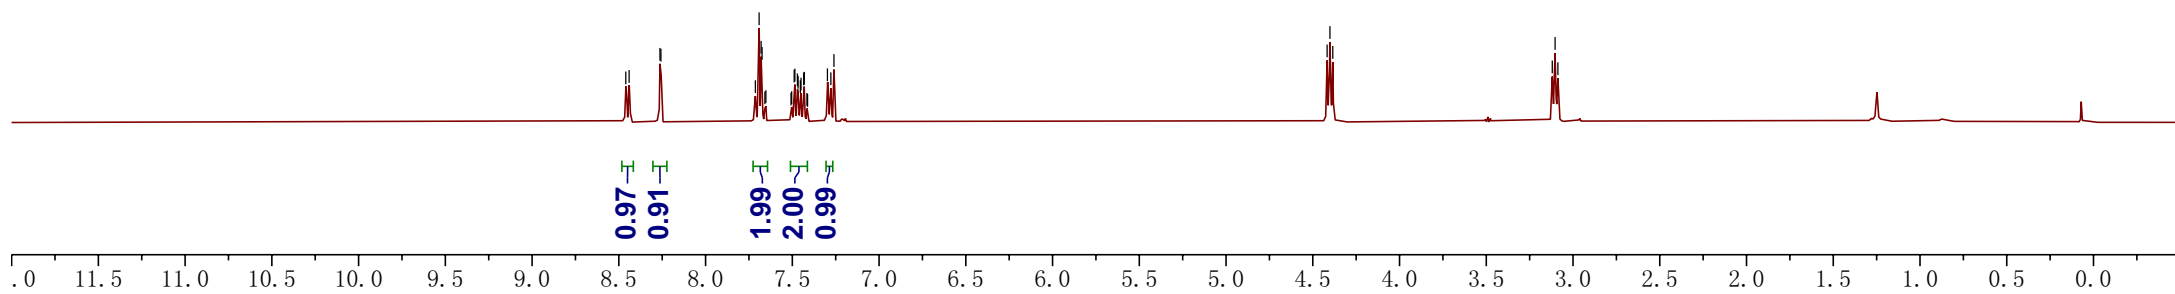

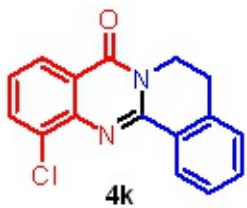

4k

$^{13}\text{C}$  NMR (100 MHz,  $\text{CDCl}_3$ )

161.41  
150.07  
144.63  
137.12  
134.61  
132.29  
132.24  
129.48  
128.71  
127.97  
127.60  
126.57  
125.85  
122.38

77.48  
77.16  
76.84

39.90

27.40

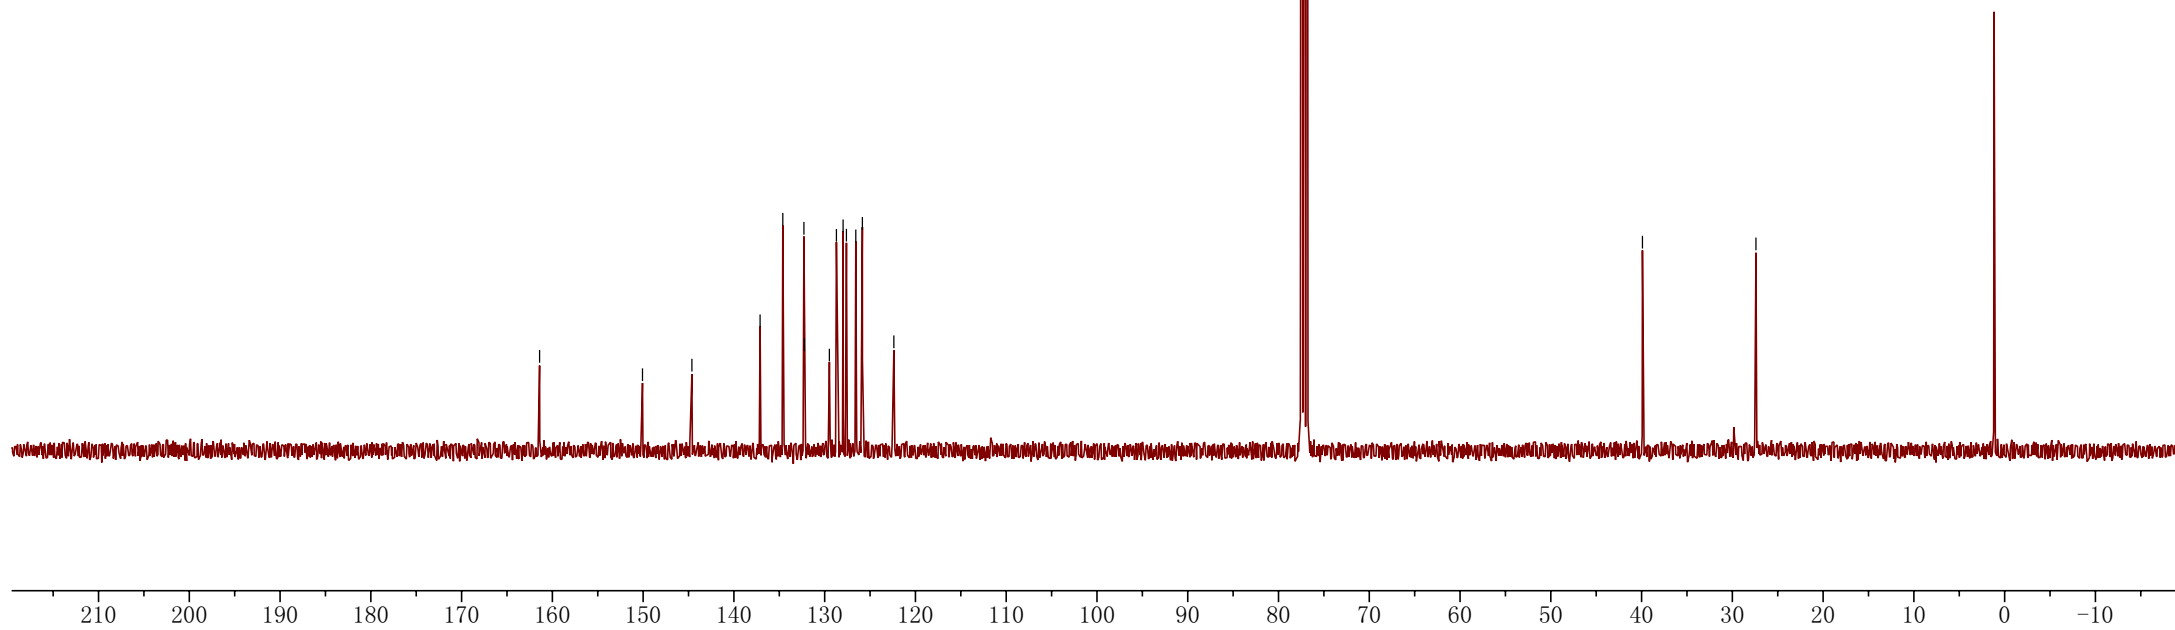

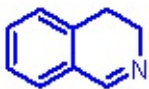

5

<sup>1</sup>H NMR (400 MHz, CDCl<sub>3</sub>)

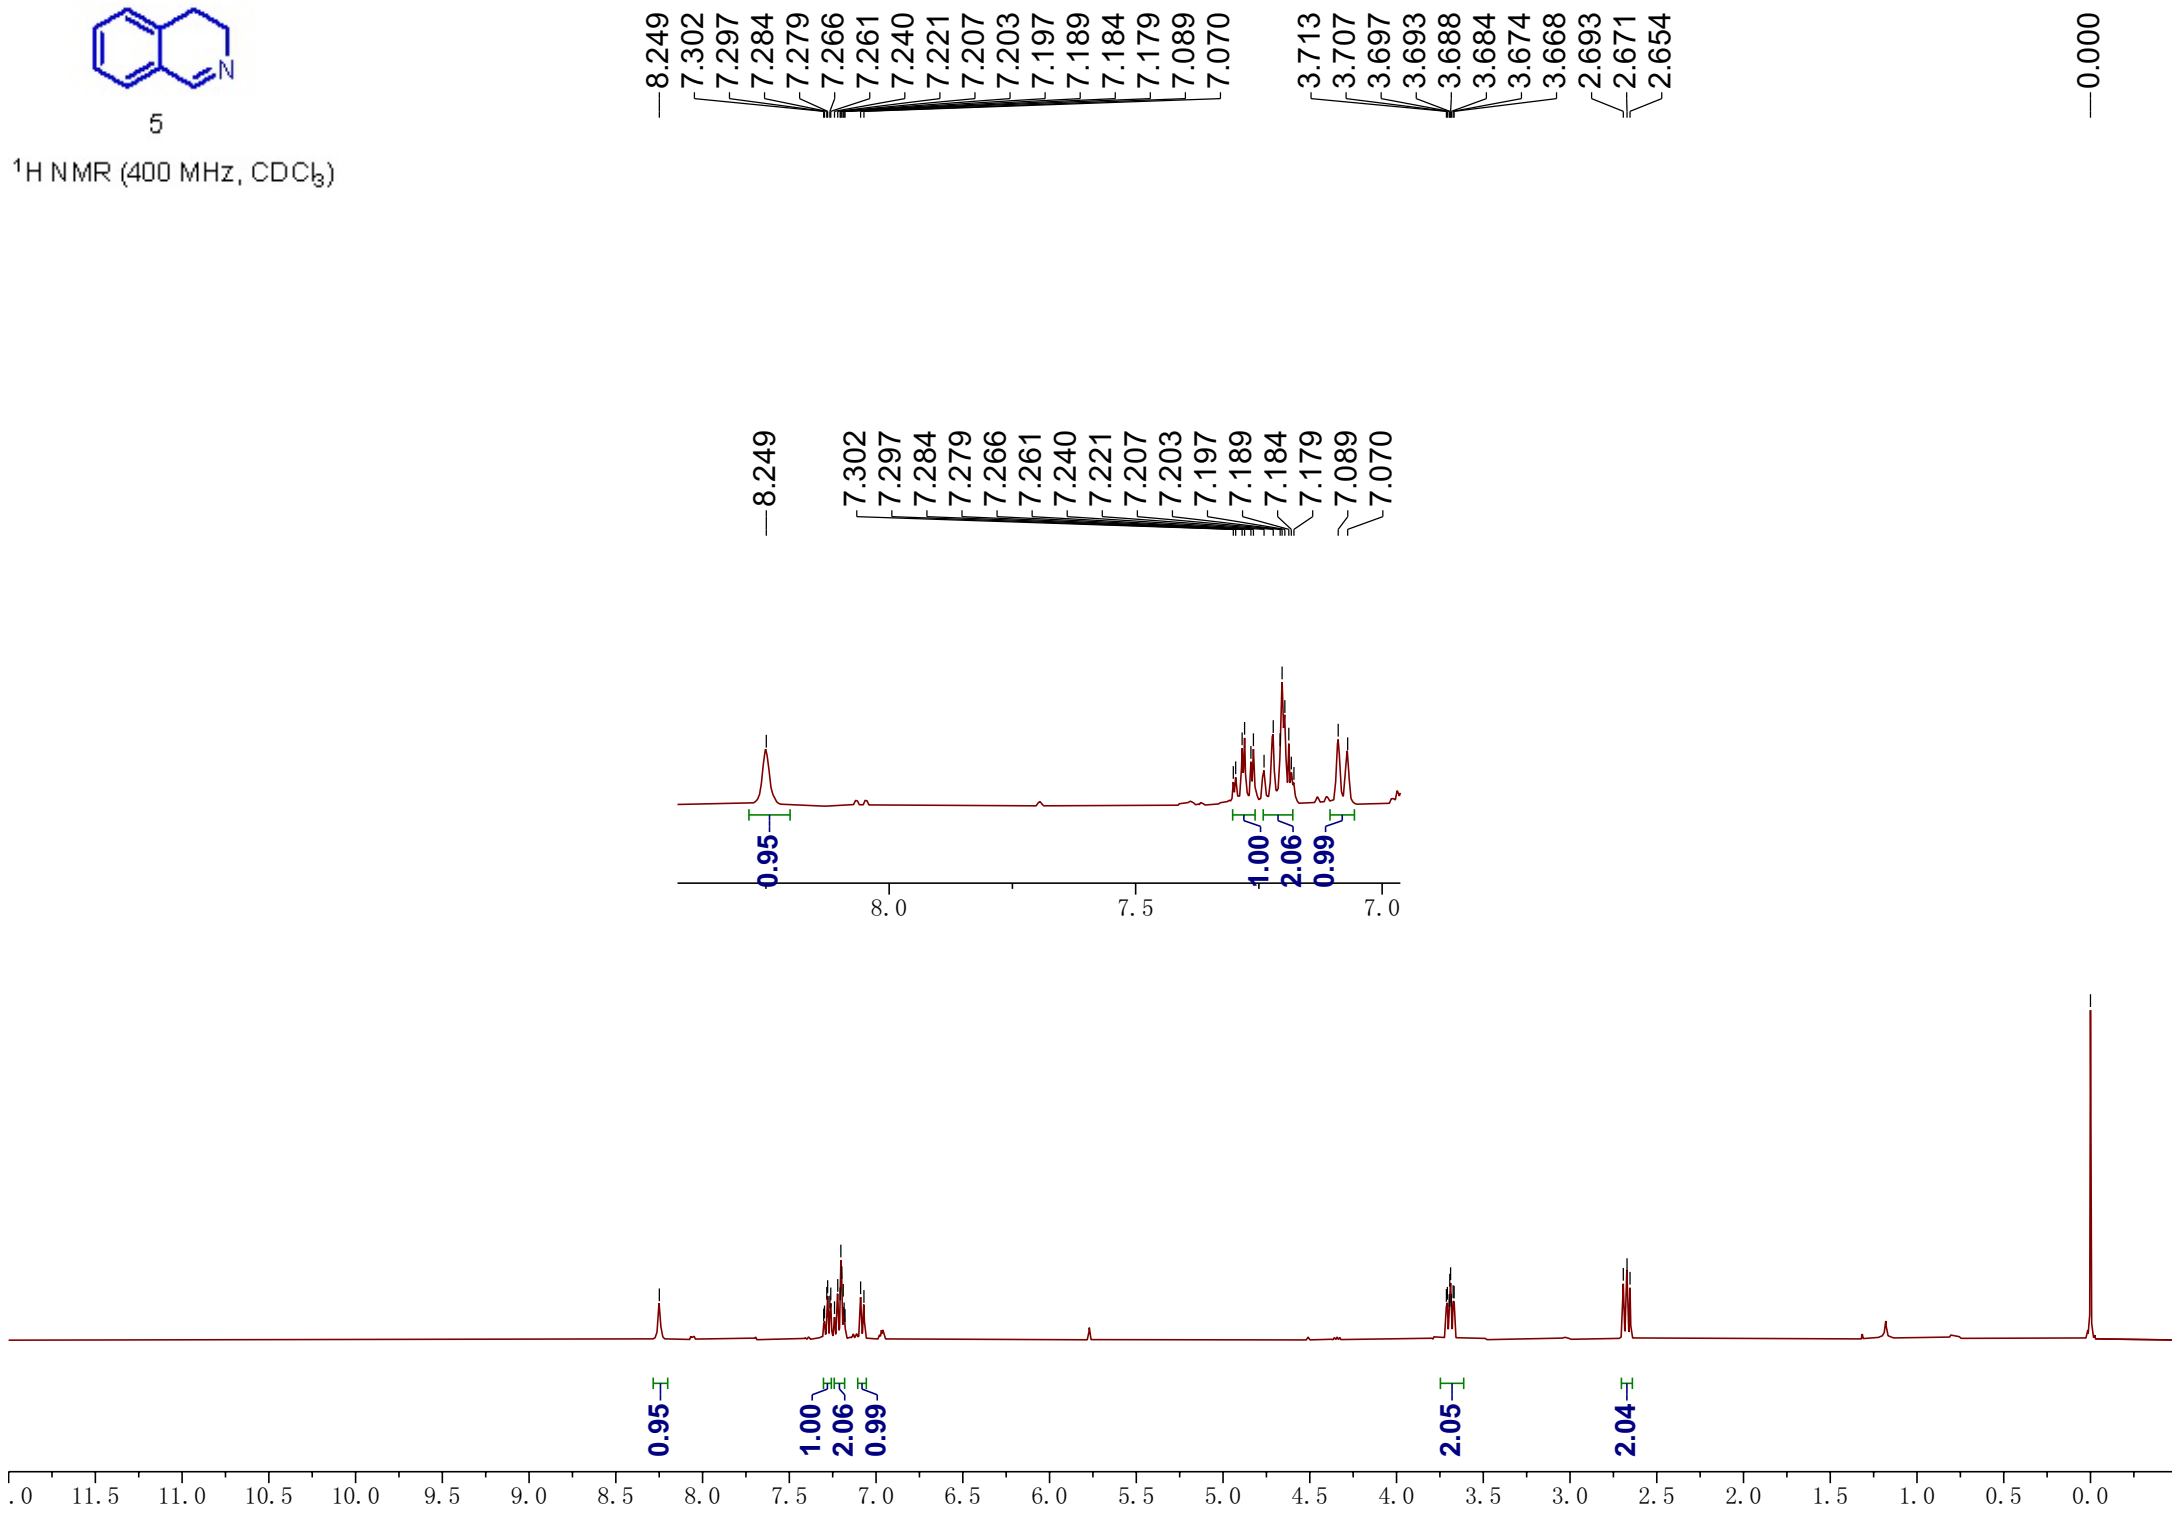

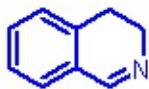

5

$^{13}\text{C}$  NMR (100 MHz,  $\text{CDCl}_3$ )

—160.14

136.09  
130.86  
128.26  
127.23  
127.00  
126.88

77.48  
77.16  
76.84

—47.17

—24.80

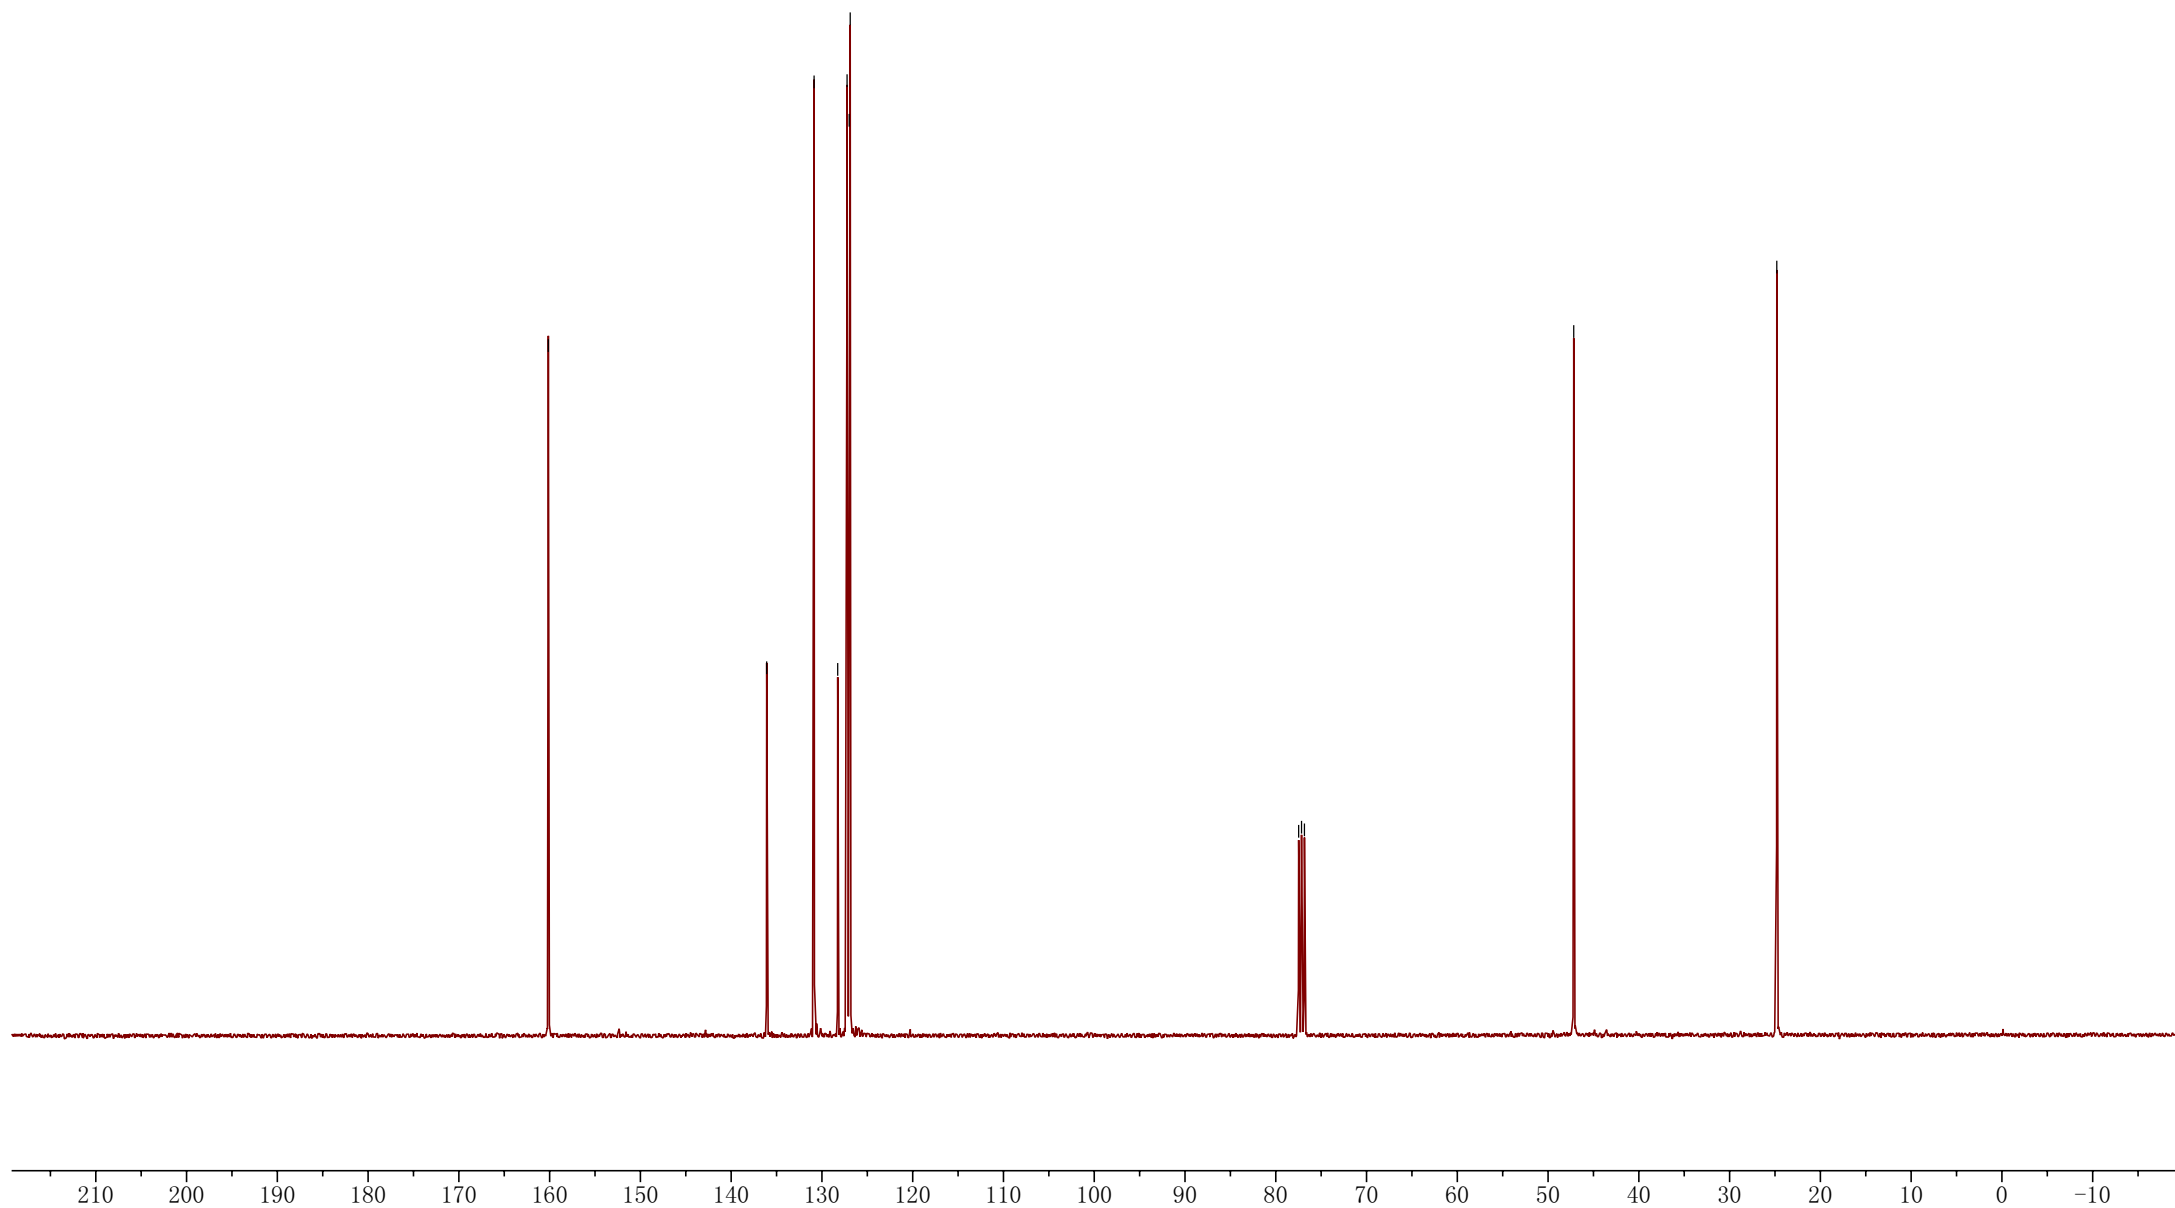

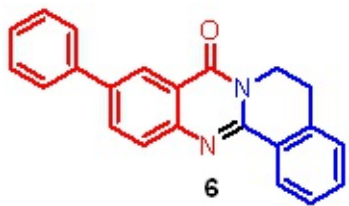

<sup>1</sup>H NMR (400 MHz, CDCl<sub>3</sub>)

8.556  
8.518  
8.499  
8.033  
8.011  
7.854  
7.836  
7.739  
7.720  
7.506  
7.492  
7.472  
7.453  
7.435  
7.412  
7.393  
7.373  
7.314  
7.296  
7.260  
4.467  
4.452  
4.438  
3.145  
3.128  
3.112

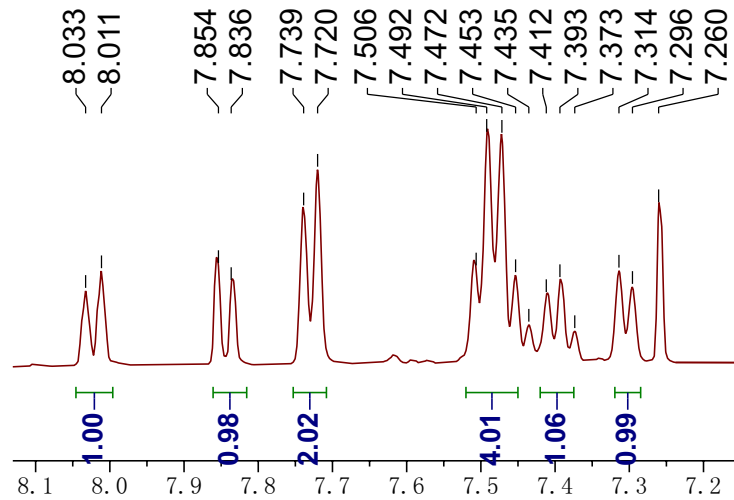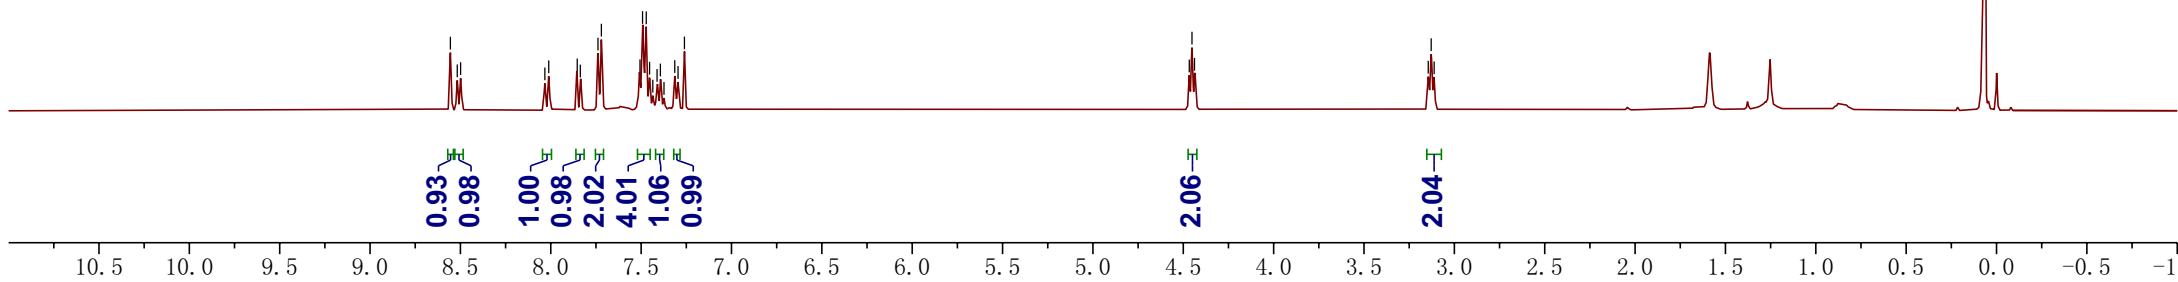

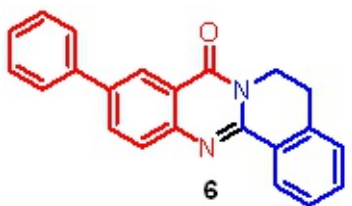

$^{13}\text{C}$  NMR (100 MHz,  $\text{CDCl}_3$ )

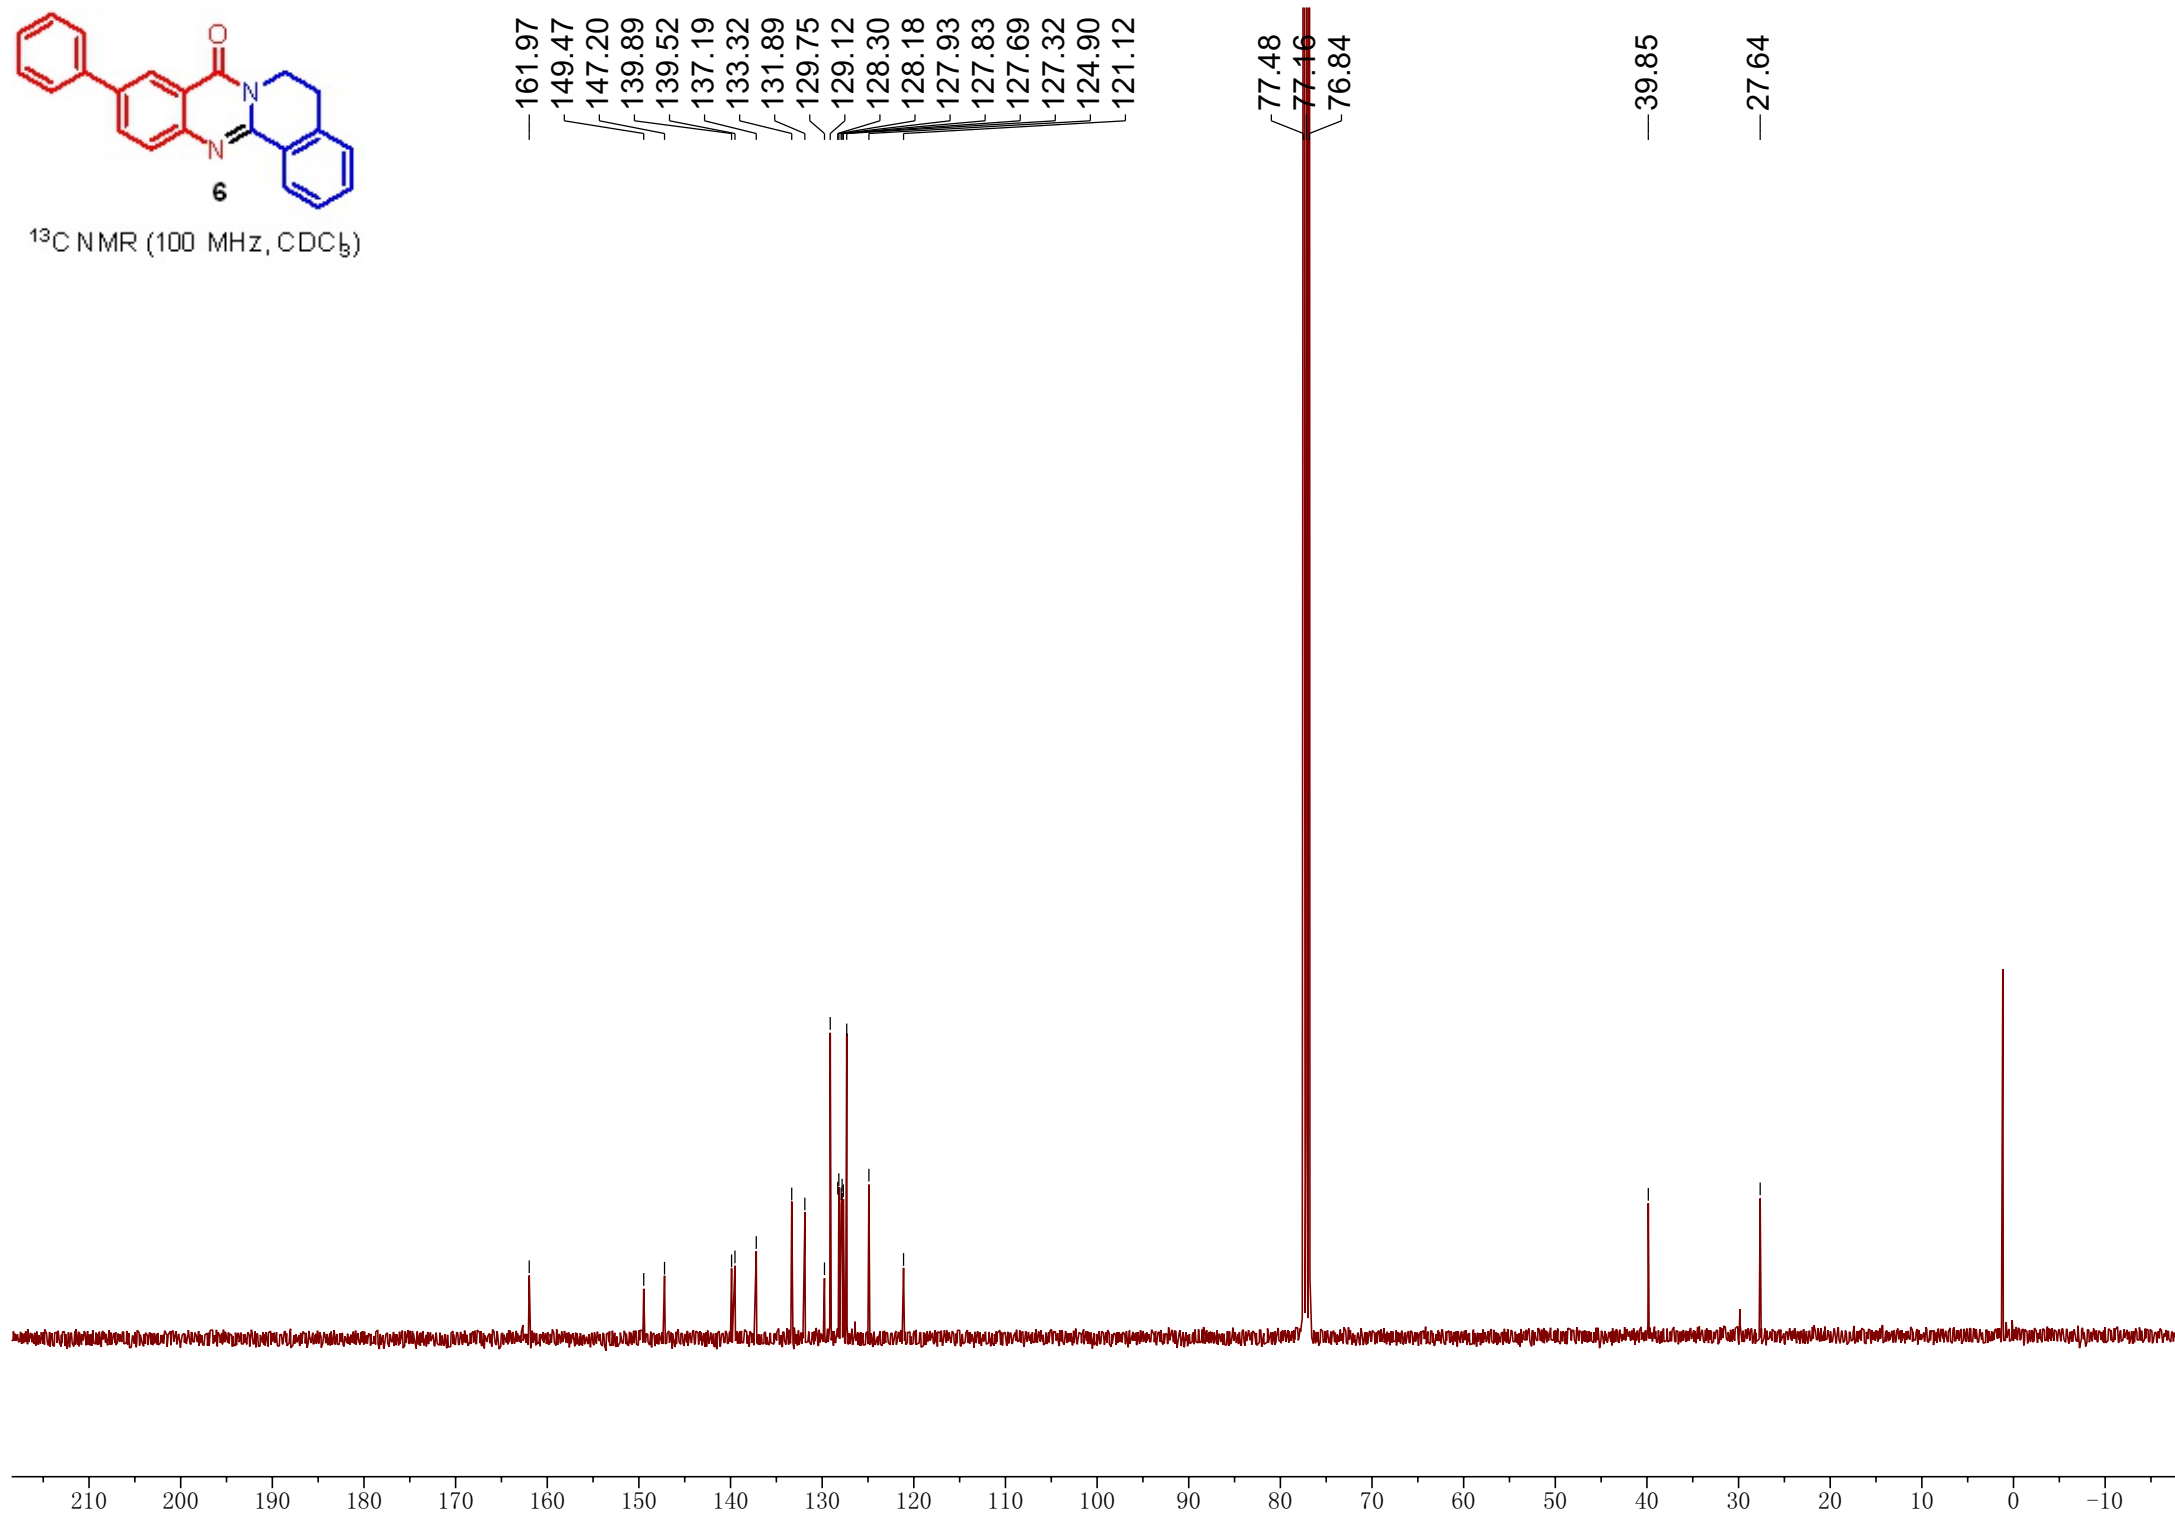

Supplement: d4ra06539e1.pdf [file d4ra06539e1.pdf]
